# Supplementary material for: Transition-metal-free access to benzyl ethers via aerobic cross-dehydrogenative coupling of benzylic C(sp3)–H bonds with alcohols
Source: Royal Society of Chemistry journal article supplement (doi:10.1039/d3gc04070d), 2024-01-01

## *Supporting Information*

# Transition-metal-free Access to Benzyl Ethers via Aerobic Cross Dehydrogenative Coupling of Benzylic C(sp<sup>3</sup>)-H with Alcohols

Xiao Zhang,<sup>a</sup> Wenjie Li,<sup>a</sup> Yang Yu,<sup>a</sup> Min Luo,<sup>a</sup> Hua Bai,<sup>a</sup> Lei Shi,<sup>b</sup>  
and Hao Li<sup>\*,a</sup>

<sup>a</sup>State Key Laboratory of Bioreactor Engineering, Shanghai Key Laboratory of New  
Drug Design, and School of Pharmacy, East China University of Science and  
Technology, 130 Mei-long Road, Shanghai, 200237, China

<sup>b</sup>Döhler Food & Beverage Ingredients (Shanghai) Co., Ltd., 739 Shennan Road,  
Shanghai 201108, China

## Table of contents

|              |                                                                                                     |            |
|--------------|-----------------------------------------------------------------------------------------------------|------------|
| <b>I.</b>    | <b>General Information.....</b>                                                                     | <b>S2</b>  |
| <b>II.</b>   | <b>General procedure for the preparation of substrates .....</b>                                    | <b>S3</b>  |
| <b>III.</b>  | <b>Optimization of alkoxylation reactions of benzylic C(sp<sup>3</sup>)-H<br/>Bond.....</b>         | <b>S14</b> |
| <b>IV.</b>   | <b>Synthesis of benzyl ethers via direct alkoxylation of benzylic C(sp<sup>3</sup>)-<br/>H.....</b> | <b>S15</b> |
| <b>V.</b>    | <b>Applications.....</b>                                                                            | <b>S36</b> |
| <b>VI.</b>   | <b>Gram-scale reaction.....</b>                                                                     | <b>S37</b> |
| <b>VII.</b>  | <b>Mechanistic Study.....</b>                                                                       | <b>S37</b> |
| <b>VIII.</b> | <b>Reference.....</b>                                                                               | <b>S45</b> |
| <b>IX.</b>   | <b><sup>1</sup>H and <sup>13</sup>C-NMR Spectra Data.....</b>                                       | <b>S46</b> |

## 1. General Information

Unless otherwise noted, all reagents were obtained commercially and used without further purification. Unless otherwise specified, all other reagents were purchased from Acros, Aldrich, Fisher, Adamas-beta Co. Ltd. or TCI and used without further purification.  $^1\text{H}$  NMR spectra was recorded at 400 MHz and 600 MHz,  $^{13}\text{C}$  NMR spectra was recorded at 100 MHz and 150 MHz.  $^1\text{H}$  NMR spectra was recorded with tetramethylsilane ( $\delta$  0.00 ppm) as internal reference;  $^{13}\text{C}$  NMR spectra was recorded with  $\text{CDCl}_3$  ( $\delta$  77.00 ppm) as internal reference. Chemical shifts were reported in parts per million (ppm,  $\delta$ ) downfield from tetramethylsilane. Proton coupling patterns are described as singlet (s), doublet (d), triplet (t), quartet (q), multiplet (m), and broad (br). Chromatography was carried out with silica gel (200-300 mesh) using mixtures of petroleum ether (b.p. 60-80 °C) and ethyl acetate as eluents. Mass Spectra were obtained from the mass spectrometry facility of East China University of Science and Technology.

## 2. General procedure for the preparation of substrates

### 2.1 General procedure A (1b as an example):<sup>[1]</sup>

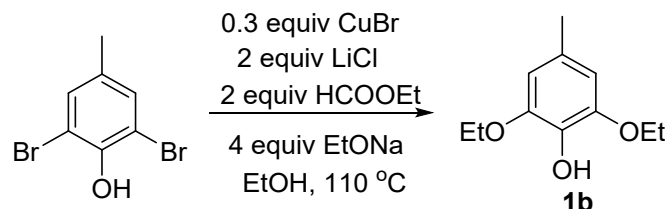

Figure S1. The synthesis of **1b**

To a solution of EtONa in EtOH [freshly prepared from metallic Na (0.18 g, 8.0 mmol) and EtOH (8 mL)], LiCl (0.17 g, 4.0 mmol), 2,6-dibromo-4-methylphenol (0.53 g, 2.0 mmol), CuBr (0.09 g, 0.6 mmol) and HCOOEt (0.30 g, 4.0 mmol) were added. The mixture was stirred at room temperature for 15 min, and then it was heated at 110 °C. After the completion of the reaction monitored by thin-layer chromatography (TLC), the mixture was stirred open to the air for 0.5 h at room temperature. Then the mixture was evaporated under reduced pressure to recover the EtOH solvent and give a residue. 10 mL MTBE and dilute 10 mL 1M hydrochloric acid were added to the residue. The organic phase was separated, and the aqueous phase was extracted with MTBE (3×10 mL), then dried over Na<sub>2</sub>SO<sub>4</sub>. After that, the solvent was removed under reduced pressure. The obtained residue was purified by column chromatography (Petroleum ether/EtOAc = 40:1) on silica gel to give the desired product.

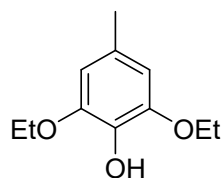

**2,6-Diethoxy-4-methylphenol (1b)**,<sup>[1]</sup> yellow solid, purification by flash column chromatography (eluent: PE/EA = 40/1), 0.32 g (82% yield). <sup>1</sup>H NMR (400 MHz, CDCl<sub>3</sub>): δ 6.37 (s, 2H), 5.38 (s, 1H), 4.09 (q, *J* = 7.2 Hz, 4H), 2.27 (s, 3H), 1.43 (t, *J* = 6.8 Hz, 6H). <sup>13</sup>C NMR (150 MHz, CDCl<sub>3</sub>): δ 146.1, 132.8, 128.5, 106.7, 64.6, 21.6, 15.0.

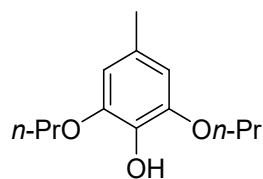

**4-Methyl-2,6-dipropoxyphenol (1c)**, <sup>[1]</sup> yellow solid, purification by flash column chromatography (eluent: PE/EA = 40/1), 0.36 g (80% yield). <sup>1</sup>H NMR (400 MHz, CDCl<sub>3</sub>): δ 6.38 (s, 2H), 5.37 (s, 1H), 3.98 (t, *J* = 6.8 Hz, 4H), 2.27 (s, 3H), 1.88 – 1.79 (m, 4H), 1.03 (t, *J* = 7.2 Hz, 6H). <sup>13</sup>C NMR (150 MHz, CDCl<sub>3</sub>): δ 146.2, 133.0, 128.5, 106.8, 70.8, 22.6, 21.5, 10.4.

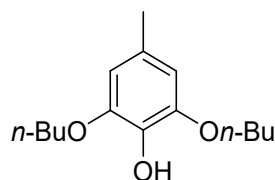

**2,6-Dibutoxy-4-methylphenol (1d)**, yellow solid, purification by flash column chromatography (eluent: PE/EA = 40/1), 0.39 g (78% yield). <sup>1</sup>H NMR (400 MHz, CDCl<sub>3</sub>): δ 6.38 (s, 2H), 5.35 (s, 1H), 4.02 (t, *J* = 6.8 Hz, 4H), 2.27 (s, 3H), 1.83 – 1.76 (m, 4H), 1.54 – 1.44 (m, 4H), 0.97 (t, *J* = 7.6 Hz, 6H). <sup>13</sup>C NMR (150 MHz, CDCl<sub>3</sub>): δ 146.3, 133.0, 128.5, 106.8, 69.0, 31.4, 21.6, 19.2, 13.9. HRMS (ESI) *m/z*: [M + Na]<sup>+</sup> Calcd for C<sub>15</sub>H<sub>24</sub>O<sub>3</sub>Na 275.1623; Found 275.1617.

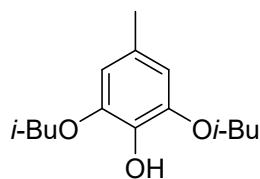

**2,6-Diisobutoxy-4-methylphenol (1e)**, yellow solid, purification by flash column chromatography (eluent: PE/EA = 50/1), 0.37 g (74% yield). <sup>1</sup>H NMR (400 MHz, CDCl<sub>3</sub>): δ 6.37 (s, 2H), 5.34 (s, 1H), 3.77 (d, *J* = 6.8 Hz, 4H), 2.26 (s, 3H), 2.18 – 2.08 (m, 2H), 1.03 (d, *J* = 6.8 Hz, 12H). <sup>13</sup>C NMR (150 MHz, CDCl<sub>3</sub>): δ 146.4, 133.0, 128.5, 106.9, 75.7, 28.3, 21.5, 19.3. HRMS (ESI) *m/z*: [M + Na]<sup>+</sup> Calcd for C<sub>15</sub>H<sub>24</sub>O<sub>3</sub>Na 275.1623; Found 275.1616.

**2.2 General procedure B (1f as an example):** <sup>[1]</sup>

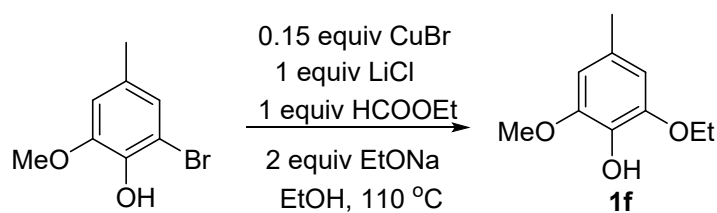

**Figure S2.** The synthesis of **1f**

To a solution of EtONa in EtOH [freshly prepared from metallic Na (0.14 g, 6.0 mmol) and ROH (6 mL)], LiCl (0.13 g, 3.0 mmol), 2-bromo-6-methoxy-4-methylphenol (0.65 g, 3.0 mmol), CuBr (0.06 g, 0.45 mmol) and HCOOEt (3.0 mmol) were added. The mixture was stirred at room temperature for 15 min, and then it was heated at 110 °C for 8 h. After the completion of the reaction monitored by thin-layer chromatography (TLC), the mixture was stirred open to the air for 0.5 h at room temperature. Then the mixture was evaporated under reduced pressure to recover the EtOH solvent and give a residue. 10 mL MTBE and dilute 10 mL 1M hydrochloric acid were added to the residue. The organic phase was separated, and the aqueous phase was extracted with MTBE (3×10 mL), then dried over Na<sub>2</sub>SO<sub>4</sub>. After that, the solvent was removed under reduced pressure. The obtained residue was purified by column chromatography (Petroleum ether/EtOAc = 20:1) on silica gel to give the desired product.

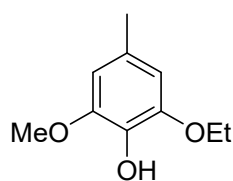

**2-Ethoxy-6-methoxy-4-methylphenol (1f)**,<sup>[1]</sup> yellow oil, purification by flash column chromatography (eluent: PE/EA = 20/1), 0.49 g (90% yield). <sup>1</sup>H NMR (400 MHz, CDCl<sub>3</sub>): δ 6.38 (s, 2H), 5.40 (s, 1H), 4.08 (q, *J* = 7.2 Hz, 2H), 3.85 (s, 3H), 2.28 (s, 3H), 1.42 (t, *J* = 6.8 Hz, 3H). <sup>13</sup>C NMR (100 MHz, CDCl<sub>3</sub>): δ 146.9, 146.1, 132.7, 128.7, 106.7, 105.7, 64.7, 56.2, 21.6, 15.0.

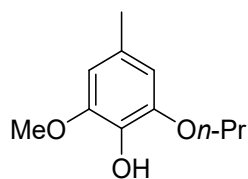

**2-Methoxy-4-methyl-6-propoxyphenol (1g)**,<sup>[2]</sup> yellow solid, purification by flash column chromatography (eluent: PE/EA = 20/1), 0.52 g (88% yield). <sup>1</sup>H NMR (400 MHz, CDCl<sub>3</sub>): δ 6.39 (s, 2H), 5.35 (s, 1H), 3.98 (t, *J* = 6.8 Hz, 2H), 3.87 (s, 3H), 2.28 (s, 3H), 1.88 – 1.79 (m, 2H), 1.04 (t, *J* = 7.6 Hz, 3H). <sup>13</sup>C NMR (100 MHz, CDCl<sub>3</sub>): δ 146.9, 146.2, 132.7, 128.7, 106.7, 105.7, 70.8, 56.2, 22.7, 21.6, 10.5.

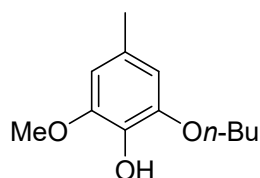

**2-Butoxy-6-methoxy-4-methylphenol (1h)**, yellow solid, purification by flash column chromatography (eluent: PE/EA = 20/1), 0.54 g (85% yield). <sup>1</sup>H NMR (600 MHz, CDCl<sub>3</sub>): δ 6.39 (s, 2H), 5.36 (s, 1H), 4.02 (t, *J* = 6.6 Hz, 2H), 3.86 (s, 3H), 2.28 (s, 3H), 1.81 – 1.78 (m, 2H), 1.51 – 1.47 (m, 2H), 0.98 (t, *J* = 7.2 Hz, 3H). <sup>13</sup>C NMR (150 MHz, CDCl<sub>3</sub>): δ 146.9, 146.2, 132.7, 128.7, 106.6, 105.7, 69.0, 56.2, 31.4, 21.6, 19.2, 13.9. HRMS (ESI) *m/z*: [M + Na]<sup>+</sup> Calcd for C<sub>12</sub>H<sub>18</sub>O<sub>3</sub>Na 233.1154; Found 233.1145.

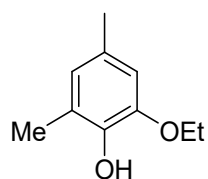

**2-Ethoxy-4,6-dimethylphenol (1i)**, yellow solid, purification by flash column chromatography (eluent: PE/EA = 30/1), 0.43 g (86% yield). <sup>1</sup>H NMR (400 MHz, CDCl<sub>3</sub>): δ 6.55 (s, 1H), 6.53 (s, 1H), 5.57 (s, 1H), 4.08 (q, *J* = 7.2 Hz, 2H), 2.25 (s, 3H), 2.23 (s, 3H), 1.43 (t, *J* = 7.2 Hz, 3H). <sup>13</sup>C NMR (150 MHz, CDCl<sub>3</sub>): δ 145.2, 141.5, 128.4, 123.3, 123.2, 110.0, 64.4, 21.0, 15.4, 15.0. HRMS (ESI) *m/z*: [M + Na]<sup>+</sup> Calcd for C<sub>10</sub>H<sub>14</sub>O<sub>2</sub>Na 189.0891; Found 189.0890.

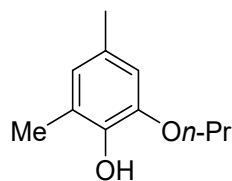

**2,4-Dimethyl-6-propoxyphenol (1j)**, yellow oil, purification by flash column chromatography (eluent: PE/EA = 30/1), 0.46 g (85% yield).  $^1\text{H}$  NMR (400 MHz,  $\text{CDCl}_3$ ):  $\delta$  6.57 (s, 1H), 6.55 (s, 1H), 5.60 (s, 1H), 3.98 (t,  $J = 6.8$  Hz, 2H), 2.27 (s, 3H), 2.25 (s, 3H), 1.89 – 1.80 (m, 2H), 1.06 (t,  $J = 7.2$  Hz, 3H).  $^{13}\text{C}$  NMR (150 MHz,  $\text{CDCl}_3$ ):  $\delta$  145.3, 141.5, 128.4, 123.3, 123.2, 110.0, 70.4, 22.6, 21.0, 15.4, 10.5. HRMS (ESI)  $m/z$ :  $[\text{M} + \text{Na}]^+$  Calcd for  $\text{C}_{11}\text{H}_{16}\text{O}_2\text{Na}$  203.1048; Found 203.1048.

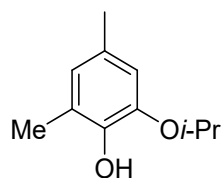

**2-Isopropoxy-4,6-dimethylphenol (1k)**, yellow oil, purification by flash column chromatography (eluent: PE/EA = 30/1), 0.37 g (68% yield).  $^1\text{H}$  NMR (400 MHz,  $\text{CDCl}_3$ ):  $\delta$  6.56 (s, 2H), 5.64 (s, 1H), 4.59 – 4.50 (m, 1H), 2.25 (s, 3H), 2.23 (s, 3H), 1.36 (d,  $J = 6.0$  Hz, 6H).  $^{13}\text{C}$  NMR (150 MHz,  $\text{CDCl}_3$ ):  $\delta$  143.9, 142.4, 128.3, 123.5, 123.4, 111.7, 71.5, 22.2, 21.0, 15.4. HRMS (ESI)  $m/z$ :  $[\text{M} + \text{Na}]^+$  Calcd for  $\text{C}_{11}\text{H}_{16}\text{O}_2\text{Na}$  203.1048; Found 203.1050.

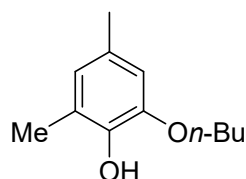

**2-Butoxy-4,6-dimethylphenol (1l)**,<sup>[1]</sup> yellow oil, purification by flash column chromatography (eluent: PE/EA = 30/1), 0.49 g (84% yield).  $^1\text{H}$  NMR (400 MHz,  $\text{CDCl}_3$ ):  $\delta$  6.55 (s, 1H), 6.54 (s, 1H), 5.57 (s, 1H), 4.02 (t,  $J = 6.8$  Hz, 2H), 2.26 (s, 3H), 2.23 (s, 3H), 1.83 – 1.73 (m, 2H), 1.55 – 1.45 (m, 2H), 0.99 (t,  $J = 7.6$  Hz, 3H).  $^{13}\text{C}$  NMR (150 MHz,  $\text{CDCl}_3$ ):  $\delta$  145.3, 141.5, 128.4, 123.3, 123.2, 110.0, 68.6, 31.3, 21.0, 19.3, 15.4, 13.9.

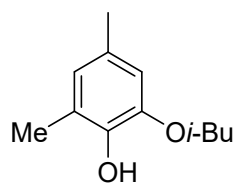

**2-Isobutoxy-4,6-dimethylphenol (1m)**, yellow oil, purification by flash column chromatography (eluent: PE/EA = 30/1), 0.40 g (69% yield).  $^1\text{H}$  NMR (400 MHz,  $\text{CDCl}_3$ ):  $\delta$  6.57 (s, 1H), 6.55 (s, 1H), 5.58 (s, 1H), 3.79 (d,  $J$  = 6.8 Hz, 2H), 2.27 (s, 3H), 2.25 (s, 3H), 2.18–2.08 (m, 1H), 1.05 (d,  $J$  = 6.4 Hz, 6H).  $^{13}\text{C}$  NMR (150 MHz,  $\text{CDCl}_3$ ):  $\delta$  144.3, 140.4, 127.4, 122.3, 122.2, 108.9, 74.1, 27.2, 20.0, 18.2, 14.3. HRMS (ESI)  $m/z$ :  $[\text{M} + \text{H}]^+$  Calcd for  $\text{C}_{12}\text{H}_{19}\text{O}_2$  195.1385; Found 195.1385.

### 2.3 General procedure C (1n as an example): <sup>[2]</sup>

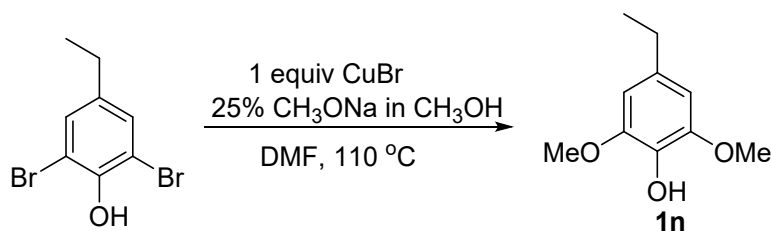

**Figure S3.** The synthesis of **1n**

To a 25% solution of  $\text{CH}_3\text{ONa}$  in  $\text{CH}_3\text{OH}$  (21 mL, 0.09 mol) was added a suspension of  $\text{CuBr}$  (429 mg, 3.0 mmol) in  $\text{DMF}$  (10 mL) and stirred at room temperature for 1 h. After the solution became blue, the mixture was added in small portions to a solution of 2,6-dibromo-4-ethylphenol (0.84 g, 3.0 mmol) in  $\text{DMF}$  (6 mL) at 110 °C and stirred at this temperature. When the reaction finished monitored by TLC, the mixture was cooled to room temperature and acidified with 2 M  $\text{HCl}$  solution. Methanol was evaporated under reduced pressure and the residue was extracted with ethyl acetate (3×20 mL). The combined organic layers were dried with anhydrous  $\text{Na}_2\text{SO}_4$ , filtered and evaporated under vacuum. The obtained residue was purified by column chromatography (Petroleum ether/ $\text{EtOAc}$  = 20:1) to give the desired product.



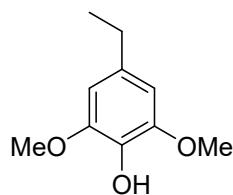

**4-Ethyl-2,6-dimethoxyphenol (1n)**,<sup>[3]</sup> yellow solid, purification by flash column chromatography (eluent: PE/EA = 20/1), 0.38 g (70% yield). <sup>1</sup>H NMR (400 MHz, CDCl<sub>3</sub>): δ 6.42 (s, 2H), 5.41 (s, 1H), 3.87 (s, 6H), 2.58 (q, *J* = 7.6 Hz, 2H), 1.22 (t, *J* = 7.6 Hz, 3H). <sup>13</sup>C NMR (100 MHz, CDCl<sub>3</sub>): δ 146.9, 135.4, 132.6, 104.4, 56.2, 29.1, 15.9.

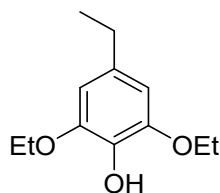

**2,6-Diethoxy-4-ethylphenol (1o)**, yellow solid, purification by flash column chromatography (eluent: PE/EA = 20/1), 0.45 g (72% yield). <sup>1</sup>H NMR (400 MHz, CDCl<sub>3</sub>): δ 6.40 (s, 2H), 5.39 (s, 1H), 4.11 (q, *J* = 7.2 Hz, 4H), 2.55 (q, *J* = 7.6 Hz, 2H), 1.44 (t, *J* = 6.8 Hz, 6H), 1.20 (t, *J* = 7.6 Hz, 3H). <sup>13</sup>C NMR (100 MHz, CDCl<sub>3</sub>): δ 146.2, 135.2, 133.2, 105.6, 64.7, 29.0, 15.9, 15.0. HRMS (ESI) *m/z*: [M + Na]<sup>+</sup> Calcd for C<sub>12</sub>H<sub>18</sub>O<sub>3</sub>Na 233.1154; Found 233.1158.

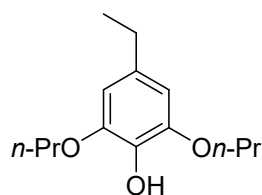

**4-Ethyl-2,6-dipropoxyphenol (1p)**, white solid, purification by flash column chromatography (eluent: PE/EA = 20/1), 0.49 g (68% yield). <sup>1</sup>H NMR (400 MHz, CDCl<sub>3</sub>): δ 6.40 (s, 2H), 5.37 (s, 1H), 3.99 (t, *J* = 6.8 Hz, 4H), 2.55 (q, *J* = 7.6 Hz, 2H), 1.87 – 1.80 (m, 4H), 1.21 (t, *J* = 7.6 Hz, 3H), 1.04 (t, *J* = 7.6 Hz, 6H). <sup>13</sup>C NMR (100 MHz, CDCl<sub>3</sub>): δ 146.3, 135.2, 133.3, 105.7, 70.8, 29.0, 22.7, 16.0, 10.5. HRMS (ESI) *m/z*: [M + Na]<sup>+</sup> Calcd for C<sub>14</sub>H<sub>22</sub>O<sub>3</sub>Na 261.1467; Found 261.1461.

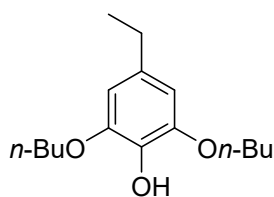

**2,6-Dibutoxy-4-ethylphenol (1q)**, white solid, purification by flash column chromatography (eluent: PE/EA = 20/1), 0.53 g (67% yield).  $^1\text{H}$  NMR (400 MHz,  $\text{CDCl}_3$ ):  $\delta$  6.40 (s, 2H), 5.35 (s, 1H), 4.03 (t,  $J = 6.8$  Hz, 4H), 2.55 (q,  $J = 7.6$  Hz, 2H), 1.83 – 1.76 (m, 4H), 1.54 – 1.45 (m, 4H), 1.21 (t,  $J = 7.6$  Hz, 3H), 0.98 (t,  $J = 7.6$  Hz, 6H).  $^{13}\text{C}$  NMR (100 MHz,  $\text{CDCl}_3$ ):  $\delta$  146.4, 135.2, 133.3, 105.7, 69.0, 31.4, 29.0, 19.2, 15.9, 13.9. HRMS (ESI)  $m/z$ :  $[\text{M} + \text{Na}]^+$  Calcd for  $\text{C}_{16}\text{H}_{26}\text{O}_3\text{Na}$  289.1780; Found 289.1778.

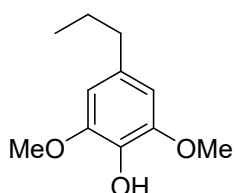

**2,6-Dimethoxy-4-propylphenol (1t)**,<sup>[4]</sup> yellow solid, purification by flash column chromatography (eluent: PE/EA = 8/1), 0.57 g (97% yield).  $^1\text{H}$  NMR (400 MHz,  $\text{CDCl}_3$ ):  $\delta$  6.39 (s, 2H), 4.67 (s, 1H), 3.84 (s, 6H), 2.49 (t,  $J = 7.6$  Hz, 2H), 1.65 – 1.56 (m, 2H), 0.93 (t,  $J = 7.6$  Hz, 3H).  $^{13}\text{C}$  NMR (100 MHz,  $\text{CDCl}_3$ ):  $\delta$  146.9, 133.8, 132.7, 105.1, 56.2, 38.3, 24.8, 13.8.

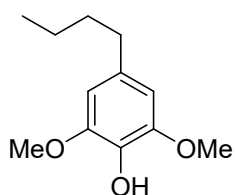

**4-Butyl-2,6-dimethoxyphenol (1u)**, yellow oil, purification by flash column chromatography (eluent: PE/EA = 8/1), 0.60 g (95% yield).  $^1\text{H}$  NMR (400 MHz,  $\text{CDCl}_3$ ):  $\delta$  6.40 (s, 2H), 5.40 (s, 1H), 3.86 (s, 6H), 2.53 (t,  $J = 7.6$  Hz, 2H), 1.61 – 1.53 (m, 2H), 1.40 – 1.31 (m, 2H), 0.93 (t,  $J = 7.2$  Hz, 3H).  $^{13}\text{C}$  NMR (100 MHz,  $\text{CDCl}_3$ ):  $\delta$  146.9, 134.0, 132.7, 105.0, 56.2, 35.9, 34.0, 22.4, 14.0. HRMS (ESI)  $m/z$ :  $[\text{M} + \text{Na}]^+$  Calcd for  $\text{C}_{12}\text{H}_{18}\text{O}_3\text{Na}$  233.1154; Found 233.1156.

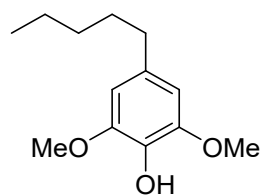

**2,6-Dimethoxy-4-pentylphenol (1v)**, yellow oil, purification by flash column chromatography (eluent: PE/EA = 8/1), 0.62 g (93% yield).  $^1\text{H}$  NMR (400 MHz,  $\text{CDCl}_3$ ):  $\delta$  6.40 (s, 2H), 5.39 (s, 1H), 3.86 (s, 6H), 2.52 (t,  $J = 7.6$  Hz, 2H), 1.63 – 1.55 (m, 2H), 1.37 – 1.29 (m, 4H), 0.90 (t,  $J = 6.8$  Hz, 3H).  $^{13}\text{C}$  NMR (100 MHz,  $\text{CDCl}_3$ ):  $\delta$  146.9, 134.1, 132.7, 105.0, 56.2, 36.2, 31.5, 31.4, 22.6, 14.1. HRMS (ESI)  $m/z$ :  $[\text{M} + \text{Na}]^+$  Calcd for  $\text{C}_{13}\text{H}_{20}\text{O}_3\text{Na}$  247.1310; Found 247.1306.

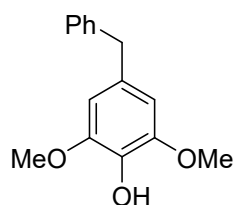

**4-Benzyl-2,6-dimethoxyphenol (1w)**, yellow solid, purification by flash column chromatography (eluent: PE/EA = 6/1), 0.43 g (59% yield).  $^1\text{H}$  NMR (400 MHz,  $\text{CDCl}_3$ ):  $\delta$  7.31 – 7.17 (m, 5H), 6.41 (s, 2H), 5.38 (s, 1H), 3.91 (s, 2H), 3.84 (s, 6H).  $^{13}\text{C}$  NMR (100 MHz,  $\text{CDCl}_3$ ):  $\delta$  147.0, 141.3, 133.1, 132.1, 128.7, 128.5, 126.1, 105.7, 56.3, 42.0. HRMS (ESI)  $m/z$ :  $[\text{M} + \text{Na}]^+$  Calcd for  $\text{C}_{15}\text{H}_{16}\text{O}_3\text{Na}$  267.0997; Found 267.1000.

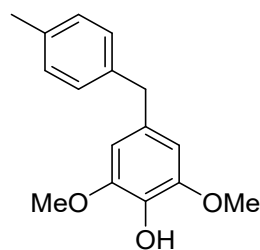

**2,6-Dimethoxy-4-(4-methylbenzyl)phenol (1x)**, white solid, purification by flash column chromatography (eluent: PE/EA = 6/1), 0.46 g (60% yield).  $^1\text{H}$  NMR (400 MHz,  $\text{CDCl}_3$ ):  $\delta$  7.11 – 7.06 (m, 4H), 6.41 (s, 2H), 5.37 (s, 1H), 3.87 (s, 2H), 3.84 (s, 6H), 2.32 (s, 3H).  $^{13}\text{C}$  NMR (100 MHz,  $\text{CDCl}_3$ ):  $\delta$  147.0, 138.2, 135.6, 133.0, 132.4,

129.1, 128.6, 105.6, 56.3, 41.6, 21.0. HRMS (ESI)  $m/z$ :  $[M + Na]^+$  Calcd for  $C_{16}H_{18}O_3Na$  281.1154; Found 281.1151.

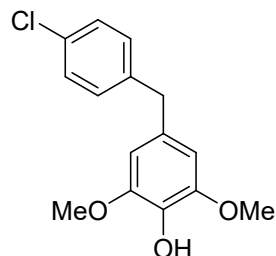

**4-(4-Chlorobenzyl)-2,6-dimethoxyphenol (1y)**, yellow solid, purification by flash column chromatography (eluent: PE/EA = 6/1), 0.53 g (64% yield).  $^1H$  NMR (400 MHz,  $DMSO-d_6$ ):  $\delta$  8.17 (s, 1H), 7.38 (d,  $J = 8.4$  Hz, 2H), 7.31 (d,  $J = 8.4$  Hz, 2H), 6.54 (s, 2H), 3.87 (s, 2H), 3.76 (s, 6H).  $^{13}C$  NMR (100 MHz,  $DMSO-d_6$ ):  $\delta$  148.5, 141.4, 134.4, 131.1, 130.9, 130.8, 128.7, 106.7, 56.4, 40.8. RMS (ESI)  $m/z$ :  $[M + Na]^+$  Calcd for  $C_{15}H_{15}O_3NaCl$  301.0607; Found 301.0600.

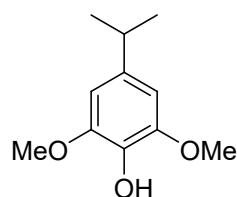

**4-Isopropyl-2,6-dimethoxyphenol (1z)**, yellow oil, purification by flash column chromatography (eluent: PE/EA = 30/1), 0.39 g (67% yield).  $^1H$  NMR (400 MHz,  $CDCl_3$ ):  $\delta$  6.45 (s, 2H), 5.38 (s, 1H), 3.89 (s, 6H), 2.88 – 2.78(m, 1H), 1.23 (d,  $J = 6.8$  Hz, 6H).  $^{13}C$  NMR (150 MHz,  $CDCl_3$ ):  $\delta$  146.8, 140.2, 132.7, 103.0, 56.2, 34.3, 24.3. HRMS (ESI)  $m/z$ :  $[M + Na]^+$  Calcd for  $C_{11}H_{16}O_3Na$  219.0997; Found 219.0995.

## 2.4 General procedure D (1r as an example): <sup>[2]</sup>

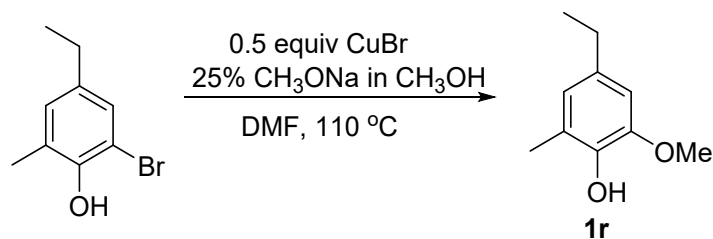

**Figure S4.** The synthesis of **1r**

To a 25% solution of CH<sub>3</sub>ONa in CH<sub>3</sub>OH (11 mL, 0.05 mol) was added a suspension of CuBr (215 mg, 1.5 mmol) in DMF (5 mL) and stirred at room temperature for 1 h. After the solution became blue, the mixture was added in small portions to a solution of 2-bromo-4-ethyl-6-methylphenol (0.65 g, 3.0 mmol) in DMF (6 mL) at 110 °C and stirred at this temperature. When the reaction finished monitored by TLC, the mixture was cooled to room temperature and acidified with 2 M HCl solution. Methanol was evaporated under reduced pressure and the residue was extracted with ethyl acetate (3×20 mL). The combined organic layers were dried with anhydrous Na<sub>2</sub>SO<sub>4</sub>, filtered and evaporated under vacuum. The obtained residue was purified by column chromatography (Petroleum ether/EtOAc = 80:1) to give the desired product.

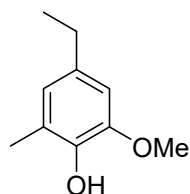

**4-Ethyl-2-methoxy-6-methylphenol (1r)**, brown oil, purification by flash column chromatography (eluent: PE/EA = 80/1), 0.40 g (81% yield). <sup>1</sup>H NMR (400 MHz, CDCl<sub>3</sub>): δ 6.64 (s, 1H), 6.62 (s, 1H), 5.65 (s, 1H), 3.90 (s, 3H), 2.61 (q, *J* = 7.6 Hz, 2H), 2.30 (s, 3H), 1.30 – 1.25 (m, 3H). <sup>13</sup>C NMR (100 MHz, CDCl<sub>3</sub>): δ 146.1, 141.7, 135.3, 123.5, 122.3, 108.0, 56.0, 28.6, 16.1, 15.5. HRMS (ESI) *m/z*: [M + Na]<sup>+</sup> Calcd for C<sub>10</sub>H<sub>14</sub>O<sub>2</sub>Na 189.0891; Found 189.0889.

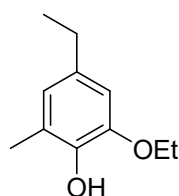

**2-Ethoxy-4-ethyl-6-methylphenol (1s)**, brown oil, purification by flash column chromatography (eluent: PE/EA = 80/1), 0.43 g (80% yield). <sup>1</sup>H NMR (400 MHz, CDCl<sub>3</sub>): δ 6.56 (s, 1H), 6.54 (s, 1H), 5.62 (s, 1H), 4.06 (q, *J* = 6.8 Hz, 2H), 2.52 (q, *J* = 7.6 Hz, 2H), 2.23 (s, 3H), 1.40 (t, *J* = 6.8 Hz, 3H), 1.19 (t, *J* = 7.6 Hz, 3H). <sup>13</sup>C NMR (100 MHz, CDCl<sub>3</sub>) δ 145.3, 141.8, 135.2, 123.5, 122.2, 109.0, 64.5, 28.6, 16.1, 15.5, 15.0. HRMS (ESI) *m/z*: [M + Na]<sup>+</sup> Calcd for C<sub>11</sub>H<sub>16</sub>O<sub>2</sub>Na 203.1048; Found 203.1049.

### 3. Optimization of alkoxylation reactions of benzylic C(sp<sup>3</sup>)-H Bond

Table S1. Optimization of reaction conditions by employing **1a** as substrate<sup>a</sup>

Reaction scheme: **1a** (2,4,6-trimethoxyphenol) reacts with 30 mol% base in solvent at 60 °C under O<sub>2</sub> for 24 h to form **2a** (2,4,6-trimethoxybenzyl alcohol).

| Entry          | Base               | Solvent             | Yield of <b>2a</b> <sup>b</sup> /% |
|----------------|--------------------|---------------------|------------------------------------|
| 1 <sup>c</sup> | KOtBu              | MeOH                | 42                                 |
| 2 <sup>c</sup> | KOtBu              | toluene : MeOH= 4:1 | 40                                 |
| 3 <sup>c</sup> | KOtBu              | DMSO : MeOH= 4:1    | -                                  |
| 4 <sup>d</sup> | KOtBu              | MeOH                | 51                                 |
| 5 <sup>e</sup> | KOtBu              | MeOH                | 72                                 |
| <b>6</b>       | <b>KOtBu</b>       | <b>MeOH</b>         | <b>78</b>                          |
| 7 <sup>f</sup> | KOtBu              | MeOH                | 67                                 |
| 8 <sup>g</sup> | KOtBu              | MeOH                | 65                                 |
| 9              | LiOtBu             | MeOH                | 41                                 |
| 10             | NaOtBu             | MeOH                | 47                                 |
| 11             | LiOH               | MeOH                | 66                                 |
| 12             | NaOH               | MeOH                | 68                                 |
| 13             | CsOH               | MeOH                | 74                                 |
| 14             | KOH                | MeOH                | 72                                 |
| 15             | KHCO <sub>3</sub>  | MeOH                | 57                                 |
| 16             | NaHCO <sub>3</sub> | MeOH                | 43                                 |

|                 |                                |      |    |
|-----------------|--------------------------------|------|----|
| 17              | CH <sub>3</sub> OK             | MeOH | 69 |
| 18              | K <sub>2</sub> CO <sub>3</sub> | MeOH | 70 |
| 19              | DBU                            | MeOH | 29 |
| 20              | TBD                            | MeOH | 25 |
| 21              | DABCO                          | MeOH | 16 |
| 22 <sup>h</sup> | KOtBu                          | MeOH | 40 |
| 23 <sup>i</sup> | KOtBu                          | MeOH | 71 |

<sup>a</sup> Unless specified, substrate **1a** (0.3 mmol) and base (0.09 mmol) in 2 mL MeOH was stirred for 24 h under O<sub>2</sub> balloon atmosphere. <sup>b</sup> Isolated yield. <sup>c</sup> 2 equiv base was used. <sup>d</sup> 0.5 equiv base was used. <sup>e</sup> The reaction was carried out with 15 h. <sup>f</sup> The reaction was carried out under aerobic atmosphere. <sup>g</sup> The reaction was carried out under N<sub>2</sub> atmosphere.

## 4. Synthesis of benzyl ethers via direct alkoxylation of benzylic C(sp<sup>3</sup>)–

### H

#### 4.1 Typical procedure A for preparing products (**2a** as an example):

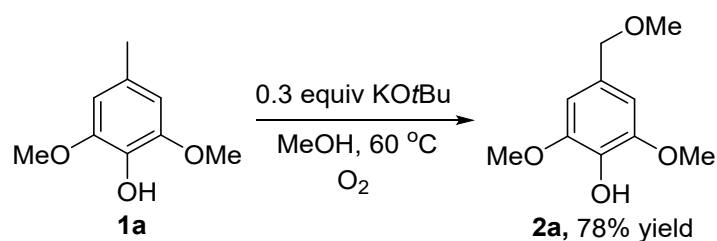

**Figure S5.** The synthesis of **2a**

Substrate **1a** (50 mg, 0.3 mmol) was dissolved in 2 mL MeOH. KOtBu (10 mg, 0.09 mmol) was added into the solution and stirred at 60 °C under oxygen balloon (1 bar). When the reaction finished in 24 h monitored by TLC, the mixture was concentrated in vacuo to recover MeOH and give a residue. Then the resulting residue was purified by flash chromatography over silica gel (Petroleum ether/EtOAc = 5:1) to give **2a** as a yellow solid (46 mg, 78% yield).

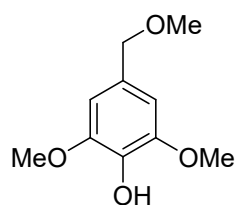

**2,6-Dimethoxy-4-(methoxymethyl)phenol (2a)**, <sup>[5]</sup> yellow oil, purification by flash column chromatography (eluent: PE/EA = 5/1), 46 mg (78% yield). <sup>1</sup>H NMR (400 MHz, CDCl<sub>3</sub>): δ 6.57 (s, 2H), 5.57 (s, 1H), 4.37 (s, 2H), 3.88 (s, 6H), 3.37 (s, 3H). <sup>13</sup>C NMR (150 MHz, CDCl<sub>3</sub>): δ 147.0, 134.2, 129.2, 104.6, 75.0, 57.9, 56.3.

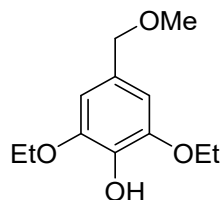

**2,6-Diethoxy-4-(methoxymethyl)phenol (2b)**, yellow solid, purification by flash column chromatography (eluent: PE/EA = 5/1), 56 mg (83% yield). <sup>1</sup>H NMR (400 MHz, CDCl<sub>3</sub>): δ 6.54 (s, 2H), 5.56 (s, 1H), 4.34 (s, 2H), 4.11 (q, *J* = 7.2 Hz, 4H), 3.35 (s, 3H), 1.43 (t, *J* = 7.2 Hz, 6H). <sup>13</sup>C NMR (150 MHz, CDCl<sub>3</sub>): δ 146.3, 134.8, 129.0, 105.8, 75.0, 64.8, 57.8, 15.0. HRMS (ESI) *m/z*: [M + Na]<sup>+</sup> Calcd for C<sub>12</sub>H<sub>18</sub>O<sub>4</sub>Na 249.1103; Found 249.1099.

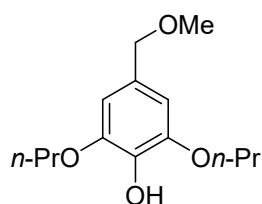

**4-(Methoxymethyl)-2,6-dipropoxyphenol (2c)**, yellow solid, purification by flash column chromatography (eluent: PE/EA = 6/1), 52 mg (68% yield). <sup>1</sup>H NMR (400 MHz, CDCl<sub>3</sub>): δ 6.55 (s, 2H), 5.53 (s, 1H), 4.34 (s, 2H), 4.00 (t, *J* = 6.8 Hz, 4H), 3.36 (s, 3H), 1.88 - 1.79 (m, 4H), 1.03 (t, *J* = 7.2 Hz, 6H). <sup>13</sup>C NMR (150 MHz, CDCl<sub>3</sub>) δ 146.5, 134.9, 129.0, 105.9, 75.0, 70.9, 57.9, 22.6, 10.5. HRMS (ESI) *m/z*: [M + Na]<sup>+</sup> Calcd for C<sub>14</sub>H<sub>22</sub>O<sub>4</sub>Na 277.1416; Found 277.1412.

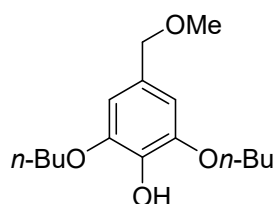

**2,6-Dibutoxy-4-(methoxymethyl)phenol (2d)**, yellow oil, purification by flash column chromatography (eluent: PE/EA = 6/1), 58 mg (69% yield). <sup>1</sup>H NMR (400



MHz, CDCl<sub>3</sub>): δ 6.48 (s, 2H), 5.46 (s, 1H), 4.28 (s, 2H), 3.97 (t, *J* = 6.8 Hz, 4H), 3.29 (s, 3H), 1.76 - 1.69 (m, 4H), 1.46 - 1.37 (m, 4H), 0.90 (t, *J* = 7.2 Hz, 6H). <sup>13</sup>C NMR (150 MHz, CDCl<sub>3</sub>): δ 145.4, 133.8, 128.0, 104.8, 74.0, 68.0, 56.8, 30.3, 18.2, 12.8. HRMS (ESI) *m/z*: [M + Na]<sup>+</sup> Calcd for C<sub>16</sub>H<sub>26</sub>O<sub>4</sub>Na 305.1729; Found 305.1728.

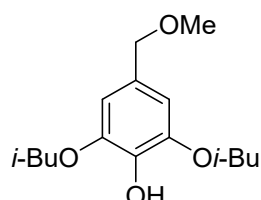

**2,6-Diisobutoxy-4-(methoxymethyl)phenol (2e)**, yellow solid, purification by flash column chromatography (eluent: PE/EA = 6/1), 55 mg (65% yield). <sup>1</sup>H NMR (400 MHz, CDCl<sub>3</sub>): δ 6.47 (s, 2H), 5.43 (s, 1H), 4.27 (s, 2H), 3.73 (d, *J* = 6.4 Hz, 4H), 3.29 (s, 3H), 2.11 - 2.01 (m, 2H), 0.96 (d, *J* = 6.4 Hz, 12H). <sup>13</sup>C NMR (150 MHz, CDCl<sub>3</sub>): δ 146.6, 134.9, 129.0, 106.0, 75.8, 75.0, 57.9, 28.3, 19.3. HRMS (ESI) *m/z*: [M + Na]<sup>+</sup> Calcd for C<sub>16</sub>H<sub>26</sub>O<sub>4</sub>Na 305.1729; Found 305.1726.

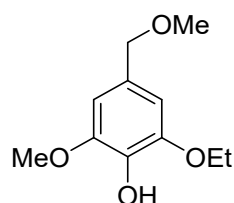

**2-Ethoxy-6-methoxy-4-(methoxymethyl)phenol (2f)**, yellow solid, purification by flash column chromatography (eluent: PE/EA = 5/1), 46 mg (73% yield). <sup>1</sup>H NMR (400 MHz, DMSO-*d*<sub>6</sub>): δ 8.18 (s, 1H), 6.56 (s, 1H), 6.55 (s, 1H), 4.28 (s, 2H), 3.99 (q, *J* = 6.8 Hz, 2H), 3.75 (s, 3H), 3.25 (s, 3H), 1.31 (t, *J* = 6.8 Hz, 3H). <sup>13</sup>C NMR (150 MHz, DMSO-*d*<sub>6</sub>): δ 148.0, 147.0, 135.3, 128.2, 106.8, 105.3, 74.1, 64.3, 57.2, 56.0, 15.0. HRMS (ESI) *m/z*: [M + Na]<sup>+</sup> Calcd for C<sub>11</sub>H<sub>16</sub>O<sub>4</sub>Na 235.0946; Found 235.0944.

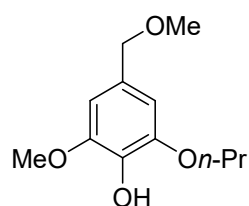

**2-Methoxy-4-(methoxymethyl)-6-propoxyphenol (2g)**, yellow solid, purification by flash column chromatography (eluent: PE/EA = 5/1), 43 mg (63% yield). <sup>1</sup>H NMR (400 MHz, DMSO-*d*<sub>6</sub>): δ 8.15 (s, 1H), 6.55 (s, 1H), 6.54 (s, 1H), 4.27 (s, 2H), 3.89 (t, *J* = 6.8 Hz, 2H), 3.75 (s, 3H), 3.25 (s, 3H), 1.76-1.67 (m, 2H), 0.97 (t, *J* = 7.2 Hz, 3H). <sup>13</sup>C NMR (150 MHz, DMSO-*d*<sub>6</sub>): δ 148.4, 147.5, 135.6, 128.6, 107.1, 105.6, 74.4, 70.7, 57.6, 56.3, 22.7, 10.9. HRMS (ESI) *m/z*: [M + Na]<sup>+</sup> Calcd for C<sub>12</sub>H<sub>18</sub>O<sub>4</sub>Na 249.1103; Found 249.1104.

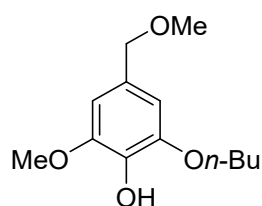

**2-Butoxy-6-methoxy-4-(methoxymethyl)phenol (2h)**, yellow solid, purification by flash column chromatography (eluent: PE/EA = 5/1), 43 mg (60% yield). <sup>1</sup>H NMR (400 MHz, DMSO-*d*<sub>6</sub>): δ 8.14 (s, 1H), 6.55 (s, 2H), 4.27 (s, 2H), 3.93 (t, *J* = 6.4 Hz, 2H), 3.75 (s, 3H), 3.25 (s, 3H), 1.72 – 1.65 (m, 2H), 1.49 – 1.39 (m, 2H), 0.92 (t, *J* = 7.2 Hz, 3H). <sup>13</sup>C NMR (150 MHz, DMSO-*d*<sub>6</sub>): δ 153.1, 152.2, 140.3, 133.3, 111.8, 110.3, 79.2, 73.5, 62.3, 61.1, 36.2, 23.9, 19.0. HRMS (ESI) *m/z*: [M + Na]<sup>+</sup> Calcd for C<sub>13</sub>H<sub>20</sub>O<sub>4</sub>Na 263.1259; Found 263.1263.

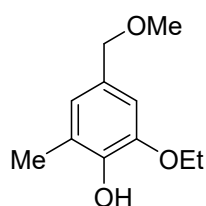

**2-Ethoxy-4-(methoxymethyl)-6-methylphenol (2i)**, yellow oil, purification by flash column chromatography (eluent: PE/EA = 5/1), 32 mg (55% yield). <sup>1</sup>H NMR (400 MHz, CDCl<sub>3</sub>): δ 6.71 (s, 1H), 6.70 (s, 1H), 5.75 (s, 1H), 4.33 (s, 2H), 4.11 (q, *J* = 6.8 Hz, 2H), 3.35 (s, 3H), 2.24 (s, 3H), 1.43 (t, *J* = 6.8 Hz, 3H). <sup>13</sup>C NMR (150 MHz, CDCl<sub>3</sub>): δ 145.4, 143.4, 128.9, 123.5, 122.9, 109.0, 74.9, 64.6, 57.8, 15.4, 15.0. HRMS (ESI) *m/z*: [M + Na]<sup>+</sup> Calcd for C<sub>11</sub>H<sub>16</sub>O<sub>3</sub>Na 219.0997; Found 219.0992.

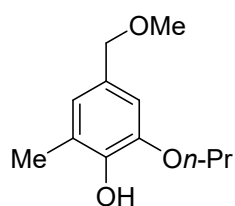

**4-(Methoxymethyl)-2-methyl-6-propoxyphenol (2j)**, yellow solid, purification by flash column chromatography (eluent: PE/EA = 6/1), 38 mg (61% yield).  $^1\text{H}$  NMR (400 MHz,  $\text{CDCl}_3$ ):  $\delta$  6.72 (s, 1H), 6.70 (s, 1H), 5.75 (s, 1H), 4.33 (s, 2H), 4.00 (t,  $J = 6.4$  Hz, 2H), 3.35 (s, 3H), 2.25 (s, 3H), 1.86 - 1.81 (m, 2H), 1.04 (t,  $J = 7.2$  Hz, 3H).  $^{13}\text{C}$  NMR (150 MHz,  $\text{CDCl}_3$ ):  $\delta$  145.6, 143.4, 128.9, 123.4, 122.9, 109.0, 74.9, 70.5, 57.8, 22.6, 15.4, 10.5. HRMS (ESI)  $m/z$ :  $[\text{M} + \text{Na}]^+$  Calcd for  $\text{C}_{12}\text{H}_{18}\text{O}_3\text{Na}$  233.1154; Found 233.1148.

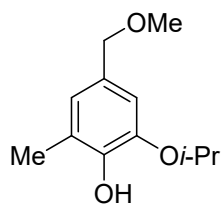

**2-Isopropoxy-4-(methoxymethyl)-6-methylphenol (2k)**, yellow oil, purification by flash column chromatography (eluent: PE/EA = 7/1), 36 mg (57% yield).  $^1\text{H}$  NMR (400 MHz,  $\text{CDCl}_3$ ):  $\delta$  6.73 (s, 1H), 6.69 (s, 1H), 5.79 (s, 1H), 4.62 - 4.53 (m, 1H), 4.33 (s, 2H), 3.35 (s, 3H), 2.24 (s, 3H), 1.35 (d,  $J = 6.0$  Hz, 6H).  $^{13}\text{C}$  NMR (150 MHz,  $\text{CDCl}_3$ ):  $\delta$  144.3, 144.2, 128.9, 123.6, 122.9, 110.6, 74.9, 71.7, 57.8, 22.3, 15.5. HRMS (ESI)  $m/z$ :  $[\text{M} + \text{Na}]^+$  Calcd for  $\text{C}_{12}\text{H}_{18}\text{O}_3\text{Na}$  233.1154; Found 233.1155.

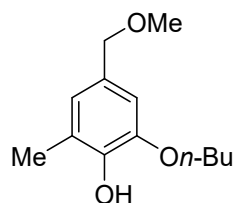

**2-Butoxy-4-(methoxymethyl)-6-methylphenol (2l)**, yellow oil, purification by flash column chromatography (eluent: PE/EA = 7/1), 42 mg (62% yield).  $^1\text{H}$  NMR (400 MHz,  $\text{CDCl}_3$ ):  $\delta$  6.72 (s, 1H), 6.70 (s, 1H), 5.75 (s, 1H), 4.33 (s, 2H), 4.03 (t,  $J = 6.8$  Hz, 2H), 3.35 (s, 3H), 2.24 (s, 3H), 1.82 - 1.75 (m, 2H), 1.53 - 1.44 (m, 2H), 0.98 (t,  $J$

= 7.2 Hz, 3H).  $^{13}\text{C}$  NMR (150 MHz,  $\text{CDCl}_3$ ):  $\delta$  145.6, 143.4, 128.9, 123.4, 122.8, 108.9, 74.9, 68.7, 57.8, 31.3, 19.2, 15.4, 13.8. HRMS (ESI)  $m/z$ :  $[\text{M} + \text{Na}]^+$  Calcd for  $\text{C}_{13}\text{H}_{20}\text{O}_3\text{Na}$  247.1310; Found 247.1304.

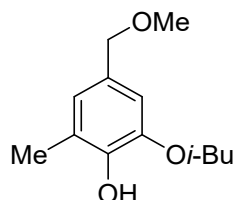

**2-Isobutoxy-4-(methoxymethyl)-6-methylphenol (2m)**, yellow oil, purification by flash column chromatography (eluent: PE/EA = 7/1), 37 mg (55% yield).  $^1\text{H}$  NMR (400 MHz,  $\text{CDCl}_3$ ):  $\delta$  6.71 (s, 1H), 6.70 (s, 1H), 5.71 (s, 1H), 4.33 (s, 2H), 3.81 (d,  $J = 6.8$  Hz, 2H), 3.36 (s, 3H), 2.25 (s, 3H), 2.17 - 2.07 (m, 1H), 1.03 (d,  $J = 6.8$  Hz, 6H).  $^{13}\text{C}$  NMR (150 MHz,  $\text{CDCl}_3$ ):  $\delta$  144.6, 142.4, 127.9, 122.4, 121.8, 107.9, 74.3, 73.9, 56.8, 27.2, 18.2, 14.4. HRMS (ESI)  $m/z$ :  $[\text{M} + \text{Na}]^+$  Calcd for  $\text{C}_{13}\text{H}_{20}\text{O}_3\text{Na}$  247.1310; Found 247.1306.

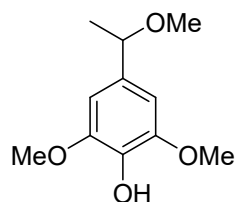

**2,6-Dimethoxy-4-(1-methoxyethyl)phenol (2n)**, yellow solid, purification by flash column chromatography (eluent: PE/EA = 5/1), 39 mg (62% yield).  $^1\text{H}$  NMR (400 MHz,  $\text{CDCl}_3$ ):  $\delta$  6.53 (s, 2H), 5.52 (s, 1H), 4.19 (q,  $J = 6.4$  Hz, 1H), 3.88 (s, 6H), 3.21 (s, 3H), 1.41 (d,  $J = 6.4$  Hz, 3H).  $^{13}\text{C}$  NMR (150 MHz,  $\text{CDCl}_3$ ):  $\delta$  147.1, 134.7, 133.9, 102.7, 79.9, 56.4, 56.3, 24.0. HRMS (ESI)  $m/z$ :  $[\text{M} + \text{Na}]^+$  Calcd for  $\text{C}_{11}\text{H}_{16}\text{O}_4\text{Na}$  235.0946; Found 235.0942.

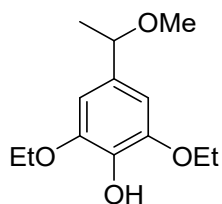

**2,6-Diethoxy-4-(1-methoxyethyl)phenol (2o)**, yellow solid, purification by flash column chromatography (eluent: PE/EA = 5/1), 50 mg (70% yield).  $^1\text{H}$  NMR (400 MHz,  $\text{CDCl}_3$ ):  $\delta$  6.51 (s, 2H), 5.53 (s, 1H), 4.18–4.08 (m, 5H), 3.19 (s, 3H), 1.44 – 1.38 (m, 9H).  $^{13}\text{C}$  NMR (150 MHz,  $\text{CDCl}_3$ ):  $\delta$  145.3, 133.5, 133.4, 102.8, 78.8, 63.7, 55.3, 23.0, 14.0. HRMS (ESI)  $m/z$ :  $[\text{M} + \text{Na}]^+$  Calcd for  $\text{C}_{13}\text{H}_{20}\text{O}_4\text{Na}$  263.1259; Found 263.1255.

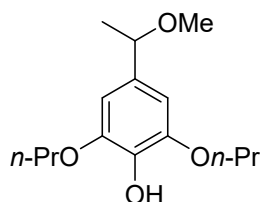

**4-(1-Methoxyethyl)-2,6-dipropoxyphenol (2p)**, yellow solid, purification by flash column chromatography (eluent: PE/EA = 5/1), 48 mg (60% yield).  $^1\text{H}$  NMR (600 MHz,  $\text{CDCl}_3$ ):  $\delta$  6.52 (s, 2H), 5.47 (s, 1H), 4.17 (q,  $J = 6.6$  Hz, 1H), 4.01 (t,  $J = 6.6$  Hz, 4H), 3.21 (s, 3H), 1.88 – 1.82 (m, 4H), 1.41 (d,  $J = 6.6$  Hz, 3H), 1.04 (t,  $J = 7.8$  Hz, 6H).  $^{13}\text{C}$  NMR (150 MHz,  $\text{CDCl}_3$ ):  $\delta$  146.5, 134.5, 134.4, 103.9, 79.9, 70.8, 56.3, 24.1, 22.6, 10.5. HRMS (ESI)  $m/z$ :  $[\text{M} + \text{Na}]^+$  Calcd for  $\text{C}_{15}\text{H}_{24}\text{O}_4\text{Na}$  291.1572; Found 291.1576.

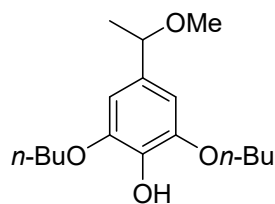

**2,6-Dibutoxy-4-(1-methoxyethyl)phenol (2q)**, yellow solid, purification by flash column chromatography (eluent: PE/EA = 7/1), 54 mg (61% yield).  $^1\text{H}$  NMR (600 MHz,  $\text{CDCl}_3$ ):  $\delta$  6.51 (s, 2H), 5.47 (s, 1H), 4.17 (q,  $J = 6.6$  Hz, 1H), 4.04 (t,  $J = 7.2$  Hz, 4H), 3.20 (s, 3H), 1.82 – 1.77 (m, 4H), 1.52 – 1.47 (m, 4H), 1.40 (d,  $J = 6.6$  Hz, 3H), 0.97 (t,  $J = 7.2$  Hz, 6H).  $^{13}\text{C}$  NMR (150 MHz,  $\text{CDCl}_3$ ):  $\delta$  146.5, 134.5, 134.4, 103.9,

79.9, 69.1, 56.3, 31.4, 24.1, 19.2, 13.9. HRMS (ESI)  $m/z$ :  $[M + Na]^+$  Calcd for  $C_{17}H_{28}O_4Na$  319.1885; Found 319.1888.

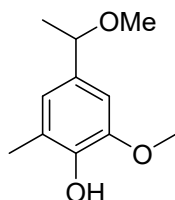

**2-Methoxy-4-(1-methoxyethyl)-6-methylphenol (2r)**, yellow solid, purification by flash column chromatography (eluent: PE/EA = 7/1), 35 mg (60% yield).  $^1H$  NMR (400 MHz,  $CDCl_3$ ):  $\delta$  6.71 (s, 1H), 6.67 (s, 1H), 5.68 (s, 1H), 4.18 (q,  $J = 6.4$  Hz, 1H), 3.89 (s, 3H), 3.21 (s, 3H), 2.25 (s, 3H), 1.42 (d,  $J = 6.4$  Hz, 3H).  $^{13}C$  NMR (100 MHz,  $CDCl_3$ ):  $\delta$  146.4, 143.0, 134.4, 123.4, 121.3, 105.7, 79.6, 56.3, 56.0, 23.9, 15.5. HRMS (ESI)  $m/z$ :  $[M + H]^+$  Calcd for  $C_{11}H_{17}O_3$  197.1178; Found 197.1174.

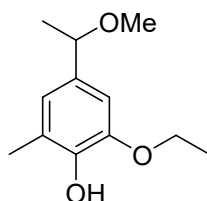

**2-Ethoxy-4-(1-methoxyethyl)-6-methylphenol (2s)**, yellow solid, purification by flash column chromatography (eluent: PE/EA = 7/1), 37 mg (58% yield).  $^1H$  NMR (600 MHz,  $CDCl_3$ ):  $\delta$  6.69 (s, 1H), 6.65 (s, 1H), 5.72 (s, 1H), 4.17 (q,  $J = 6.0$  Hz, 1H), 4.12 (q,  $J = 6.6$  Hz, 2H), 3.20 (s, 3H), 2.25 (s, 3H), 1.44 (t,  $J = 6.6$  Hz, 3H), 1.41 (d,  $J = 6.0$  Hz, 3H).  $^{13}C$  NMR (150 MHz,  $CDCl_3$ ):  $\delta$  145.6, 143.1, 134.3, 123.3, 121.2, 106.6, 79.6, 64.5, 56.3, 24.0, 15.6, 15.0. HRMS (ESI)  $m/z$ :  $[M + Na]^+$  Calcd for  $C_{12}H_{18}O_3Na$  233.1154; Found 233.1153.

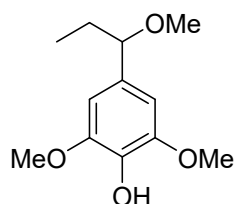

**2,6-Dimethoxy-4-(1-methoxypropyl)phenol (2t)**, yellow solid, purification by flash column chromatography (eluent: PE/EA = 7/1), 41 mg (61% yield).  $^1H$  NMR (600

MHz, CDCl<sub>3</sub>):  $\delta$  6.50 (s, 2H), 5.50 (s, 1H), 3.90 (t,  $J = 7.2$  Hz, 1H), 3.88 (s, 6H), 3.20 (s, 3H), 1.84 – 1.76 (m, 1H), 1.66 – 1.57 (m, 1H), 0.86 (t,  $J = 7.2$  Hz, 3H). <sup>13</sup>C NMR (150 MHz, CDCl<sub>3</sub>):  $\delta$  147.0, 133.9, 133.4, 103.2, 85.8, 56.6, 56.3, 31.0, 10.4. HRMS (ESI)  $m/z$ : [M + Na]<sup>+</sup> Calcd for C<sub>12</sub>H<sub>18</sub>O<sub>4</sub>Na 249.1103; Found 249.1098.

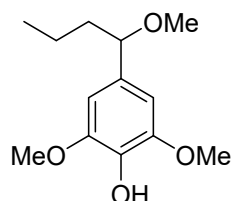

**2,6-Dimethoxy-4-(1-methoxybutyl)phenol (2u)**, yellow solid, purification by flash column chromatography (eluent: PE/EA = 7/1), 55 mg (76% yield). <sup>1</sup>H NMR (600 MHz, CDCl<sub>3</sub>):  $\delta$  6.44 (s, 2H), 5.46 (s, 1H), 3.91 (t,  $J = 7.2$  Hz, 1H), 3.81 (s, 6H), 3.12 (s, 3H), 1.73 – 1.67 (m, 1H), 1.52 – 1.46 (m, 1H), 1.37 – 1.28 (m, 1H), 1.23 – 1.14 (m, 1H), 0.82 (t,  $J = 7.2$  Hz, 3H). <sup>13</sup>C NMR (150 MHz, CDCl<sub>3</sub>):  $\delta$  146.0, 132.8, 132.7, 102.1, 83.1, 55.5, 55.2, 39.4, 18.1, 13.0. HRMS (ESI)  $m/z$ : [M + Na]<sup>+</sup> Calcd for C<sub>13</sub>H<sub>20</sub>O<sub>4</sub>Na 263.1259; Found 263.1259.

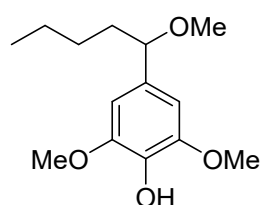

**2,6-Dimethoxy-4-(1-methoxypentyl)phenol (2v)**, yellow solid, purification by flash column chromatography (eluent: PE/EA = 7/1), 52 mg (68% yield). <sup>1</sup>H NMR (600 MHz, CDCl<sub>3</sub>):  $\delta$  6.50 (s, 2H), 5.49 (s, 1H), 3.96 (t,  $J = 6.6$  Hz, 1H), 3.88 (s, 6H), 3.19 (s, 3H), 1.81 – 1.75 (m, 1H), 1.61 – 1.55 (m, 1H), 1.39 – 1.17 (m, 4H), 0.86 (t,  $J = 7.2$  Hz, 3H). <sup>13</sup>C NMR (150 MHz, CDCl<sub>3</sub>):  $\delta$  147.0, 133.9, 133.8, 103.2, 84.5, 56.5, 56.3, 38.0, 28.1, 22.6, 14.0. HRMS (ESI)  $m/z$ : [M + Na]<sup>+</sup> Calcd for C<sub>14</sub>H<sub>22</sub>O<sub>4</sub>Na 277.1416; Found 277.1412.

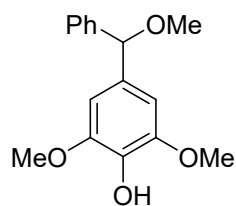

**2,6-Dimethoxy-4-(methoxy(phenyl)methyl)phenol (2w)**, yellow solid, purification by flash column chromatography (eluent: PE/EA = 7/1), 61 mg (74% yield).  $^1\text{H}$  NMR (600 MHz,  $\text{CDCl}_3$ ):  $\delta$  7.34 – 7.30 (m, 4H), 7.25 – 7.23(m, 1H), 6.57 (s, 2H), 5.52 (s, 1H), 5.15 (s, 1H), 3.83 (s, 6H), 3.37 (s, 3H).  $^{13}\text{C}$  NMR (150 MHz,  $\text{CDCl}_3$ ):  $\delta$  147.0, 142.1, 134.1, 133.1, 128.4, 127.5, 126.9, 103.8, 85.5, 57.0, 56.3. HRMS (ESI)  $m/z$ :  $[\text{M} + \text{Na}]^+$  Calcd for  $\text{C}_{16}\text{H}_{18}\text{O}_4\text{Na}$  297.1103; Found 297.1103.

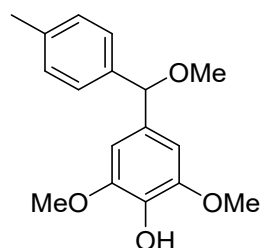

**2,6-Dimethoxy-4-(methoxy(p-tolyl)methyl)phenol (2x)**, yellow solid, purification by flash column chromatography (eluent: PE/EA = 7/1), 54 mg (62% yield).  $^1\text{H}$  NMR (400 MHz,  $\text{CDCl}_3$ ):  $\delta$  7.21 (d,  $J$  = 8.0 Hz, 2H), 7.13 (d,  $J$  = 8.0 Hz, 2H), 6.57 (s, 2H), 5.46 (s, 1H), 5.13 (s, 1H), 3.86 (s, 6H), 3.37 (s, 3H), 2.33 (s, 3H).  $^{13}\text{C}$  NMR (100 MHz,  $\text{CDCl}_3$ ):  $\delta$  147.0, 139.1, 137.2, 133.9, 133.4, 129.1, 126.8, 103.6, 85.3, 57.0, 56.3, 21.1. HRMS (ESI)  $m/z$ :  $[\text{M} + \text{Na}]^+$  Calcd for  $\text{C}_{17}\text{H}_{20}\text{O}_4\text{Na}$  311.1259; Found 311.1260.

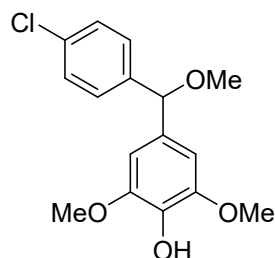

**4-((4-Chlorophenyl)(methoxy)methyl)-2,6-dimethoxyphenol (2y)**, yellow solid, purification by flash column chromatography (eluent: PE/EA = 7/1), 53 mg (57% yield).  $^1\text{H}$  NMR (600 MHz,  $\text{CDCl}_3$ ):  $\delta$  7.30 – 7.25 (m, 4H), 6.53 (s, 2H), 5.50 (s, 1H), 5.12 (s, 1H), 3.86 (s, 6H), 3.37 (s, 3H).  $^{13}\text{C}$  NMR (150 MHz,  $\text{CDCl}_3$ ):  $\delta$  147.1, 140.7,



134.2, 133.2, 132.6, 128.5, 128.2, 103.7, 84.7, 57.0, 56.3. HRMS (ESI)  $m/z$ :  $[M + Na]^+$   
Calcd for  $C_{16}H_{17}O_4NaCl$  331.0713; Found 331.0704.

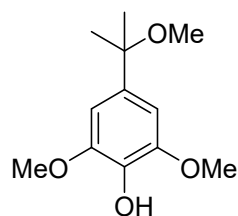

**2,6-Dimethoxy-4-(2-methoxypropan-2-yl)phenol (2z)**, yellow oil, purification by flash column chromatography (eluent: PE/EA = 7/1), 20 mg (29% yield).  $^1H$  NMR (400 MHz,  $CDCl_3$ ):  $\delta$  6.64 (s, 2H), 5.48 (s, 1H), 3.90 (s, 6H), 3.07 (s, 3H), 1.52 (s, 6H).  $^{13}C$  NMR (150 MHz,  $CDCl_3$ ):  $\delta$  145.7, 136.2, 132.5, 101.8, 55.3, 49.6, 27.0. HRMS (ESI)  $m/z$ :  $[M + Na]^+$  Calcd for  $C_{12}H_{18}O_4Na$  249.1103; Found 249.1104.

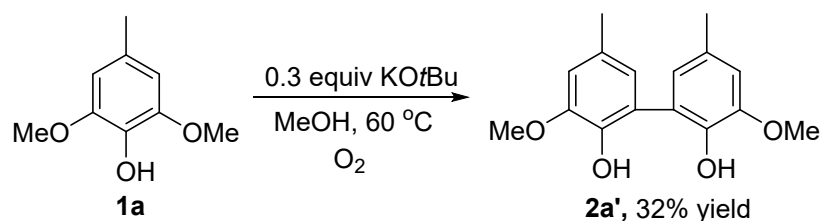

**Figure S6.** The dimer formation of **1a**

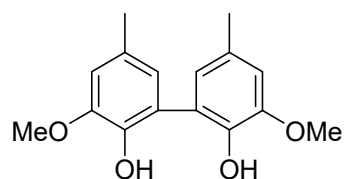

**3,3'-Dimethoxy-5,5'-dimethyl-[1,1'-biphenyl]-2,2'-diol (2a')**,<sup>[6]</sup> brown solid, purification by flash column chromatography (eluent:  $CH_2Cl_2/MeOH$  = 30:1), 13 mg (32% yield).  $^1H$  NMR (400 MHz,  $CDCl_3$ ):  $\delta$  6.73 (s, 2H), 6.72 (s, 2H), 6.00 (s, 2H), 3.91 (s, 6H), 2.33 (s, 6H).  $^{13}C$  NMR (150 MHz,  $CDCl_3$ ):  $\delta$  147.0, 140.3, 129.6, 124.3, 123.4, 111.3, 56.0, 21.2.

## 4.2 Typical procedure B for preparing products (3b as an example):

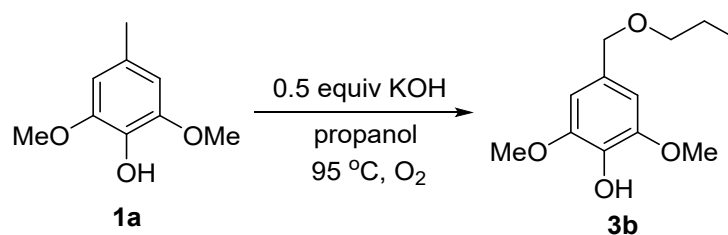

**Figure S7.** The synthesis of **3b**

Substrate **1a** (50 mg, 0.3 mmol) was dissolved in 2 mL propanol. KOH (8 mg, 0.15 mmol) was added into the solution and stirred at 95 °C under oxygen balloon (1 bar). When the reaction finished in 48 h monitored by TLC, the mixture was concentrated in vacuo to recover propanol and give a residue. Then the resulting residue was purified by flash chromatography over silica gel (Petroleum ether/EtOAc = 5:1) to give **3b** as a yellow oil (34 mg, 50% yield).

The reaction of synthesizing **3a** was carried out at 65 °C.

The reaction of synthesizing **3m** was carried out in MeCN and 10 equiv alcohol was used.

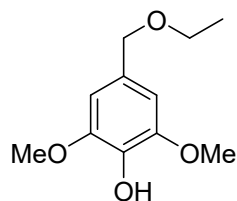

**4-(Ethoxymethyl)-2,6-dimethoxyphenol (3a)**, yellow oil, purification by flash column chromatography (eluent: PE/EA = 5/1), 34 mg (53% yield). <sup>1</sup>H NMR (400 MHz, CDCl<sub>3</sub>): δ 6.58 (s, 2H), 4.41 (s, 2H), 3.88 (s, 6H), 3.52 (q, *J* = 7.2 Hz, 2H), 1.24 (t, *J* = 7.2 Hz, 3H). <sup>13</sup>C NMR (150 MHz, CDCl<sub>3</sub>): δ 146.9, 134.1, 129.5, 104.5, 73.0, 65.5, 56.2, 15.2. HRMS (ESI) *m/z*: [M + Na]<sup>+</sup> Calcd for C<sub>11</sub>H<sub>16</sub>O<sub>4</sub>Na 235.0946; Found 235.0936.

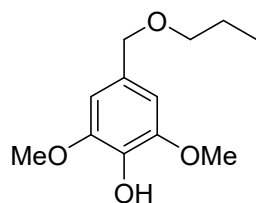

**2,6-Dimethoxy-4-(propoxymethyl)phenol (3b)**, yellow oil, purification by flash column chromatography (eluent: PE/EA = 5/1), 34 mg (50% yield). <sup>1</sup>H NMR (400 MHz, CDCl<sub>3</sub>): δ 6.58 (s, 2H), 5.49 (s, 1H), 4.42 (s, 2H), 3.89 (s, 6H), 3.42 (t, *J* = 6.8 Hz, 2H), 1.68 – 1.59 (m, 2H), 0.94 (t, *J* = 7.2 Hz, 3H). <sup>13</sup>C NMR (150 MHz, CDCl<sub>3</sub>): δ 147.0, 134.1, 129.8, 104.5, 73.1, 72.0, 56.3, 23.0, 10.7. HRMS (ESI) *m/z*: [M + Na]<sup>+</sup> Calcd for C<sub>12</sub>H<sub>18</sub>O<sub>4</sub>Na 249.1103; Found 249.1102.

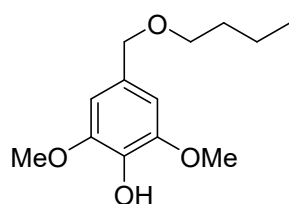

**4-(Butoxymethyl)-2,6-dimethoxyphenol (3c)**, yellow oil, purification by flash column chromatography (eluent: PE/EA = 6/1), 33 mg (46% yield). <sup>1</sup>H NMR (400 MHz, CDCl<sub>3</sub>): δ 6.58 (s, 2H), 5.51 (s, 1H), 4.41 (s, 2H), 3.88 (s, 6H), 3.45 (t, *J* = 6.8 Hz, 2H), 1.63 – 1.56 (m, 2H), 1.44 – 1.35 (m, 2H), 0.92 (t, *J* = 7.2 Hz, 3H). <sup>13</sup>C NMR (150 MHz, CDCl<sub>3</sub>): δ 147.0, 134.1, 129.8, 104.5, 73.2, 70.1, 56.23, 31.8, 19.4, 14.0. HRMS (ESI) *m/z*: [M + Na]<sup>+</sup> Calcd for C<sub>13</sub>H<sub>20</sub>O<sub>4</sub>Na 263.1259; Found 263.1251.

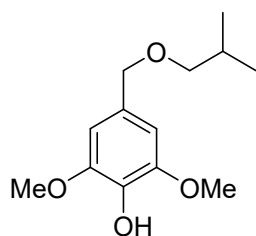

**4-(Isobutoxymethyl)-2,6-dimethoxyphenol (3d)**, yellow oil, purification by flash column chromatography (eluent: PE/EA = 6/1), 30 mg (41% yield). <sup>1</sup>H NMR (400 MHz, CDCl<sub>3</sub>): δ 6.58 (s, 2H), 5.50 (s, 1H), 4.42 (s, 2H), 3.88 (s, 6H), 3.21 (d, *J* = 6.4 Hz, 2H), 1.95 – 1.85 (m, 1H), 0.92 (d, *J* = 6.8 Hz, 6H). <sup>13</sup>C NMR (150 MHz, CDCl<sub>3</sub>): δ 147.1, 134.1, 130.0, 104.5, 77.2, 73.3, 56.4, 28.6, 19.6. HRMS (ESI) *m/z*: [M + Na]<sup>+</sup> Calcd for C<sub>13</sub>H<sub>20</sub>O<sub>4</sub>Na 263.1259; Found 263.1253.

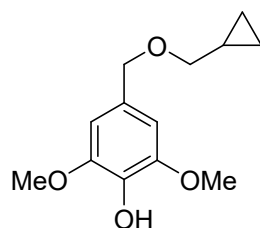

**4-((Cyclopropylmethoxy)methyl)-2,6-dimethoxyphenol (3e)**, yellow oil, purification by flash column chromatography (eluent: PE/EA = 5/1), 38 mg (53% yield).  $^1\text{H}$  NMR (400 MHz,  $\text{CDCl}_3$ ):  $\delta$  6.58 (s, 2H), 5.51 (s, 1H), 4.45 (s, 2H), 3.88 (s, 6H), 3.28 (d,  $J = 7.2$  Hz, 2H), 1.13 – 1.05 (m, 1H), 0.56 – 0.52 (m, 2H), 0.21 – 0.18 (m, 2H).  $^{13}\text{C}$  NMR (150 MHz,  $\text{CDCl}_3$ ):  $\delta$  146.0, 133.1, 128.6, 103.5, 73.8, 71.8, 55.2, 9.6, 2.1. HRMS (ESI)  $m/z$ :  $[\text{M} + \text{Na}]^+$  Calcd for  $\text{C}_{13}\text{H}_{18}\text{O}_4\text{Na}$  261.1103; Found 261.1096.

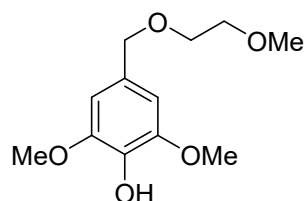

**2,6-Dimethoxy-4-((2-methoxyethoxy)methyl)phenol (3f)**, yellow oil, purification by flash column chromatography (eluent: PE/EA = 7/1), 37 mg (51% yield).  $^1\text{H}$  NMR (400 MHz,  $\text{CDCl}_3$ ):  $\delta$  6.60 (s, 2H), 5.52 (s, 1H), 4.49 (s, 2H), 3.89 (s, 6H), 3.63 – 3.56 (m, 4H), 3.40 (s, 3H).  $^{13}\text{C}$  NMR (150 MHz,  $\text{CDCl}_3$ ):  $\delta$  147.0, 134.2, 129.2, 104.7, 73.6, 72.0, 69.0, 59.1, 56.3. HRMS (ESI)  $m/z$ :  $[\text{M} + \text{Na}]^+$  Calcd for  $\text{C}_{12}\text{H}_{18}\text{O}_5\text{Na}$  265.1052; Found 265.1046.

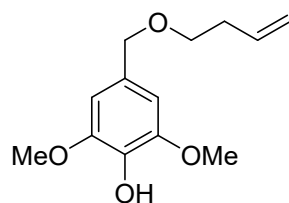

**4-((But-3-en-1-yloxy)methyl)-2,6-dimethoxyphenol (3g)**, yellow oil, purification by flash column chromatography (eluent: PE/EA = 7/1), 34 mg (47% yield).  $^1\text{H}$  NMR (400 MHz,  $\text{CDCl}_3$ ):  $\delta$  6.58 (s, 2H), 5.89 – 5.79 (m, 1H), 5.51 (s, 1H), 5.13 – 5.08 (m, 1H), 5.06 – 5.03 (m, 1H), 4.43 (s, 2H), 3.89 (s, 6H), 3.51 (t,  $J = 6.8$  Hz, 2H), 2.41 – 2.35 (m, 2H).  $^{13}\text{C}$  NMR (150 MHz,  $\text{CDCl}_3$ ):  $\delta$  146.9, 135.2, 134.1, 129.4, 116.4, 104.5, 73.1,

69.4, 56.2, 34.2. HRMS (ESI) m/z:  $[M + Na]^+$  Calcd for  $C_{13}H_{18}O_4Na$  261.1103; Found 261.1100.

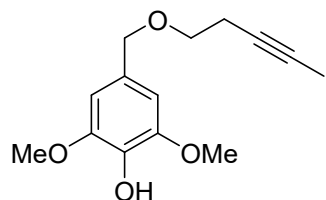

**2,6-Dimethoxy-4-((pent-3-yn-1-yloxy)methyl)phenol (3h)**, yellow oil, purification by flash column chromatography (eluent: PE/EA = 7/1), 32 mg (42% yield).  $^1H$  NMR (400 MHz,  $CDCl_3$ ):  $\delta$  6.59 (s, 2H), 5.51 (s, 1H), 4.47 (s, 2H), 3.90 (s, 6H), 3.54 (t,  $J$  = 6.8 Hz, 2H), 2.46 – 2.43 (m, 2H), 1.79 (t,  $J$  = 2.4 Hz, 3H).  $^{13}C$  NMR (150 MHz,  $CDCl_3$ ):  $\delta$  147.0, 134.2, 129.2, 104.6, 76.7, 75.9, 73.2, 68.6, 56.3, 20.2, 3.6. HRMS (ESI) m/z:  $[M + Na]^+$  Calcd for  $C_{14}H_{18}O_4Na$  273.1103; Found 273.1097.

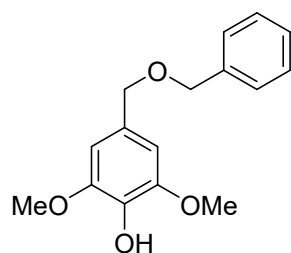

**4-((Benzyloxy)methyl)-2,6-dimethoxyphenol (3i)**, yellow oil, purification by flash column chromatography (eluent: PE/EA = 10/1), 35 mg (42% yield).  $^1H$  NMR (400 MHz,  $CDCl_3$ ):  $\delta$  7.34 – 7.26 (m, 5H), 6.58 (s, 2H), 5.53 (s, 1H), 4.50 (s, 2H), 4.49 (s, 2H), 3.89 (s, 6H).  $^{13}C$  NMR (150 MHz,  $CDCl_3$ ):  $\delta$  147.0, 138.2, 134.2, 129.3, 128.4, 127.9, 127.7, 104.7, 72.4, 71.9, 56.3. HRMS (ESI) m/z:  $[M + Na]^+$  Calcd for  $C_{16}H_{18}O_4Na$  297.1103; Found 297.1100.

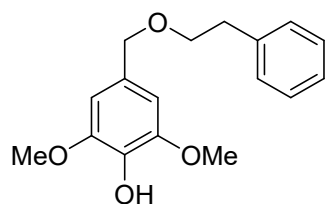

**2,6-Dimethoxy-4-(phenethoxymethyl)phenol (3j)**, yellow oil, purification by flash column chromatography (eluent: PE/EA = 8/1), 37 mg (43% yield).  $^1\text{H}$  NMR (400 MHz,  $\text{CDCl}_3$ ):  $\delta$  7.32 – 7.19 (m, 5H), 6.52 (s, 2H), 5.48 (s, 1H), 4.44 (s, 2H), 3.85 (s, 6H), 3.69 (t,  $J = 6.8$  Hz, 2H), 2.93 (t,  $J = 6.8$  Hz, 2H).  $^{13}\text{C}$  NMR (150 MHz,  $\text{CDCl}_3$ ):  $\delta$  147.0, 139.0, 134.0, 129.5, 129.0, 128.3, 126.2, 104.4, 73.2, 71.0, 56.2, 36.4. HRMS (ESI)  $m/z$ :  $[\text{M} + \text{Na}]^+$  Calcd for  $\text{C}_{17}\text{H}_{20}\text{O}_4\text{Na}$  311.1259; Found 311.1256.

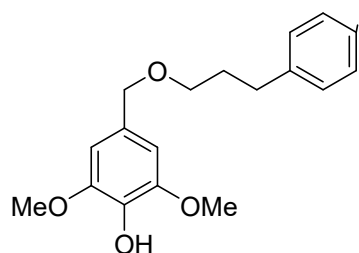

**2,6-Dimethoxy-4-((3-(p-tolyl)propoxy)methyl)phenol (3k)**, yellow oil, purification by flash column chromatography (eluent: PE/EA = 12/1), 46 mg (51% yield).  $^1\text{H}$  NMR (400 MHz,  $\text{CDCl}_3$ ):  $\delta$  7.31 – 7.27 (m, 2H), 7.21 – 7.16 (m, 3H), 6.59 (s, 2H), 5.52 (s, 1H), 4.43 (s, 2H), 3.89 (s, 6H), 3.48 (t,  $J = 6.4$  Hz, 2H), 2.72 (t,  $J = 7.6$  Hz, 2H), 1.98 – 1.91 (m, 2H).  $^{13}\text{C}$  NMR (150 MHz,  $\text{CDCl}_3$ ):  $\delta$  147.0, 141.9, 134.1, 129.6, 128.5, 128.3, 125.8, 104.6, 73.2, 69.4, 56.3, 32.4, 31.3. HRMS (ESI)  $m/z$ :  $[\text{M} + \text{Na}]^+$  Calcd for  $\text{C}_{19}\text{H}_{24}\text{O}_4\text{Na}$  339.1572; Found 339.1569.

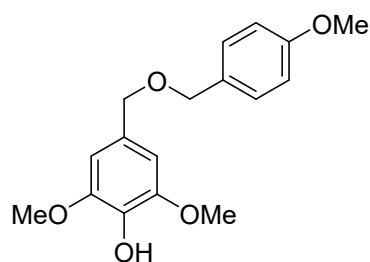

**2,6-Dimethoxy-4-(((4-methoxybenzyl)oxy)methyl)phenol (3l)**, yellow oil, purification by flash column chromatography (eluent: PE/EA = 10/1), 38 mg (42% yield).  $^1\text{H}$  NMR (400 MHz,  $\text{CDCl}_3$ ):  $\delta$  7.29 (d,  $J = 8.8$  Hz, 2H), 6.90 (d,  $J = 8.8$  Hz, 2H), 6.59 (s, 2H), 4.48 (s, 2H), 4.44 (s, 2H), 3.89 (s, 6H), 3.81 (s, 3H).  $^{13}\text{C}$  NMR (150

MHz, CDCl<sub>3</sub>):  $\delta$  159.2, 147.0, 134.2, 130.3, 129.5, 129.4, 113.8, 104.7, 72.1, 71.6, 56.3, 55.3. HRMS (ESI)  $m/z$ : [M + Na]<sup>+</sup> Calcd for C<sub>17</sub>H<sub>20</sub>O<sub>5</sub>Na 327.1208; Found 327.1204.

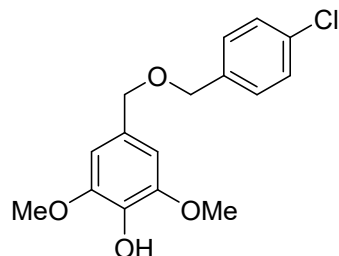

**4-(((4-Chlorobenzyl)oxy)methyl)-2,6-dimethoxyphenol (3m)**, yellow oil, purification by flash column chromatography (eluent: PE/EA = 10/1), 45 mg (49% yield). <sup>1</sup>H NMR (400 MHz, CDCl<sub>3</sub>):  $\delta$  7.34 – 7.28 (m, 4H), 6.58 (s, 2H), 5.53 (s, 1H), 4.50 (s, 2H), 4.46 (s, 2H), 3.89 (s, 6H). <sup>13</sup>C NMR (150 MHz, CDCl<sub>3</sub>):  $\delta$  147.0, 136.7, 134.3, 133.4, 129.2, 129.0, 128.6, 104.7, 72.5, 71.1, 56.3. HRMS (ESI)  $m/z$ : [M + Na]<sup>+</sup> Calcd for C<sub>16</sub>H<sub>17</sub>O<sub>4</sub>NaCl 331.0713; Found 331.0708.

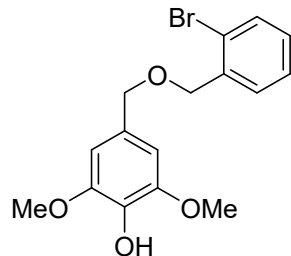

**4-(((2-Bromobenzyl)oxy)methyl)-2,6-dimethoxyphenol (3n)**, yellow oil, purification by flash column chromatography (eluent: PE/EA = 8/1), 50 mg (47% yield). <sup>1</sup>H NMR (400 MHz, CDCl<sub>3</sub>):  $\delta$  7.55 (d,  $J$  = 7.6 Hz, 1H), 7.51 (d,  $J$  = 7.6 Hz, 1H), 7.32 (t,  $J$  = 7.6 Hz, 1H), 7.16 (t,  $J$  = 7.2 Hz, 1H), 6.64 (s, 2H), 5.52 (s, 1H), 4.61 (s, 2H), 4.55 (s, 2H), 3.90 (s, 6H). <sup>13</sup>C NMR (100 MHz, CDCl<sub>3</sub>):  $\delta$  147.0, 137.6, 134.3, 132.6, 129.4, 129.1, 129.0, 127.4, 123.0, 104.8, 73.0, 71.4, 56.3. HRMS (ESI)  $m/z$ : [M + Na]<sup>+</sup> Calcd for C<sub>16</sub>H<sub>17</sub>O<sub>4</sub>BrNa 375.0208; Found 375.0209.

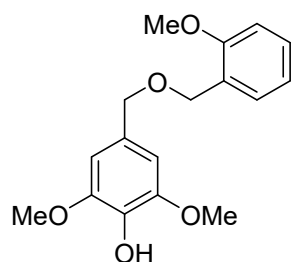

**2,6-Dimethoxy-4-(((2-methoxybenzyl)oxy)methyl)phenol (3o)**, yellow oil, purification by flash column chromatography (eluent: PE/EA = 8/1), 42 mg (46% yield).  $^1\text{H}$  NMR (400 MHz,  $\text{CDCl}_3$ ):  $\delta$  7.40 (d,  $J = 7.2$  Hz, 1H), 7.29 (d,  $J = 8.0$  Hz, 1H), 6.97 (t,  $J = 7.2$  Hz, 1H), 6.88 (d,  $J = 8.4$  Hz, 1H), 6.62 (s, 2H), 5.49 (s, 1H), 4.59 (s, 2H), 4.52 (s, 2H), 3.89 (s, 6H), 3.83 (s, 3H).  $^{13}\text{C}$  NMR (150 MHz,  $\text{CDCl}_3$ ):  $\delta$  156.2, 145.9, 133.1, 128.7, 128.1, 127.7, 125.6, 119.4, 109.2, 103.6, 71.6, 65.8, 55.3, 54.3. HRMS (ESI)  $m/z$ :  $[\text{M} + \text{Na}]^+$  Calcd for  $\text{C}_{17}\text{H}_{20}\text{O}_5\text{Na}$  3727.1208; Found 327.1209.

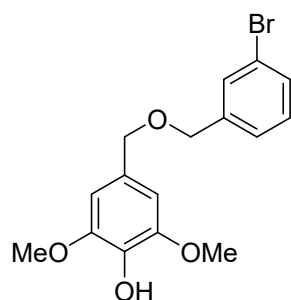

**4-(((3-Bromobenzyl)oxy)methyl)-2,6-dimethoxyphenol (3p)**, yellow oil, purification by flash column chromatography (eluent: PE/EA = 8/1), 53 mg (50% yield).  $^1\text{H}$  NMR (400 MHz,  $\text{CDCl}_3$ )  $\delta$  7.53 (s, 1H), 7.42 (d,  $J = 7.6$  Hz, 1H), 7.28 – 7.20 (m, 2H), 6.59 (s, 2H), 5.54 (s, 1H), 4.50 (s, 2H), 4.47 (s, 2H), 3.90 (s, 6H).  $^{13}\text{C}$  NMR (150 MHz,  $\text{CDCl}_3$ ):  $\delta$  147.1, 140.7, 134.4, 130.8, 130.7, 130.0, 128.9, 126.3, 122.6, 104.8, 72.7, 71.0, 56.3. HRMS (ESI)  $m/z$ :  $[\text{M} + \text{Na}]^+$  Calcd for  $\text{C}_{16}\text{H}_{17}\text{O}_4\text{BrNa}$  375.0208; Found 375.0208.



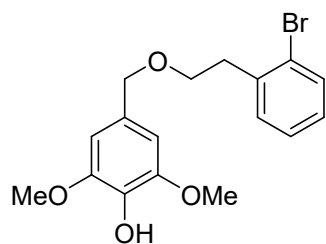

**4-((2-Bromophenoxy)methyl)-2,6-dimethoxyphenol (3q)**, yellow oil, purification by flash column chromatography (eluent: PE/EA = 8/1), 49 mg (45% yield).  $^1\text{H}$  NMR (400 MHz,  $\text{CDCl}_3$ ):  $\delta$  7.53 (d,  $J = 8.0$  Hz, 1H), 7.29 (d,  $J = 7.6$  Hz, 1H), 7.23 (t,  $J = 8.0$  Hz, 1H), 7.10 – 7.06 (m, 1H), 6.53 (s, 2H), 5.48 (s, 1H), 4.46 (s, 2H), 3.87 (s, 6H), 3.70 (t,  $J = 7.2$  Hz, 2H), 3.09 (t,  $J = 7.2$  Hz, 2H).  $^{13}\text{C}$  NMR (150 MHz,  $\text{CDCl}_3$ ):  $\delta$  147.0, 138.2, 134.1, 132.8, 131.2, 129.4, 128.0, 127.3, 124.7, 104.3, 73.1, 69.1, 56.3, 36.5. HRMS (ESI)  $m/z$ :  $[\text{M} + \text{Na}]^+$  Calcd for  $\text{C}_{17}\text{H}_{19}\text{O}_4\text{NaBr}$  389.0364; Found 389.0358.

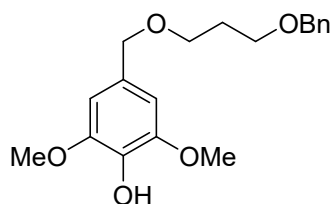

**4-((3-(Benzyloxy)propoxy)methyl)-2,6-dimethoxyphenol (3r)**, yellow oil, purification by flash column chromatography (eluent: PE/EA = 15/1), 43 mg (43% yield).  $^1\text{H}$  NMR (400 MHz,  $\text{CDCl}_3$ ):  $\delta$  7.36 – 7.28 (m, 5H), 6.56 (s, 2H), 5.49 (s, 1H), 4.50 (s, 2H), 4.41 (s, 2H), 3.87 (s, 6H), 3.61 – 3.57 (m, 4H), 1.97 – 1.91 (m, 2H).  $^{13}\text{C}$  NMR (100 MHz,  $\text{CDCl}_3$ ):  $\delta$  147.0, 138.5, 134.1, 129.6, 128.4, 127.6, 127.5, 104.6, 73.3, 73.0, 67.4, 67.2, 56.3, 30.2. HRMS (ESI)  $m/z$ :  $[\text{M} + \text{Na}]^+$  Calcd for  $\text{C}_{19}\text{H}_{24}\text{O}_5\text{Na}$  355.1521; Found 355.1520.

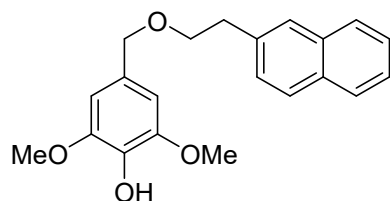

**2,6-Dimethoxy-4-((2-(naphthalen-2-yl)ethoxy)methyl)phenol (3s)**, yellow oil, purification by flash column chromatography (eluent: PE/EA = 15/1), 45 mg (44% yield). <sup>1</sup>H NMR (400 MHz, CDCl<sub>3</sub>): δ 8.05 (d, *J* = 8.4 Hz, 1H), 7.85 (d, *J* = 7.6 Hz, 1H), 7.74 (d, *J* = 7.6 Hz, 1H), 7.52 – 7.45 (m, 2H), 7.42 – 7.38 (m, 2H), 6.51 (s, 2H), 5.47 (s, 1H), 4.46 (s, 2H), 3.85 – 3.81 (m, 8H), 3.42 (t, *J* = 7.2 Hz, 2H). <sup>13</sup>C NMR (150 MHz, CDCl<sub>3</sub>): δ 147.0, 134.9, 134.1, 133.8, 132.1, 129.4, 128.8, 127.1, 126.9, 125.9, 125.6, 125.5, 123.7, 104.4, 73.3, 70.4, 56.2, 33.5. HRMS (ESI) *m/z*: [M + Na]<sup>+</sup> Calcd for C<sub>21</sub>H<sub>22</sub>O<sub>4</sub>Na 361.1416; Found 361.1415.

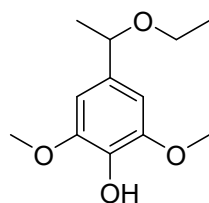

**4-(1-Ethoxyethyl)-2,6-dimethoxyphenol (3t)**, yellow oil, purification by flash column chromatography (eluent: PE/EA = 5/1), 21 mg (31% yield). <sup>1</sup>H NMR (400 MHz, CDCl<sub>3</sub>): δ 6.55 (s, 2H), 5.47 (s, 1H), 4.31 (q, *J* = 6.4 Hz, 1H), 3.89 (s, 6H), 3.40 – 3.30 (m, 2H), 1.42 (d, *J* = 6.4 Hz, 3H), 1.18 (t, *J* = 7.2 Hz, 3H). <sup>13</sup>C NMR (150 MHz, CDCl<sub>3</sub>): δ 147.0, 135.5, 133.8, 102.6, 78.0, 63.8, 56.3, 24.4, 15.4. HRMS (ESI) *m/z*: [M + Na]<sup>+</sup> Calcd for C<sub>12</sub>H<sub>18</sub>O<sub>4</sub>Na 249.1103; Found 249.1094.

### 4.3 Typical procedure for preparing benzyl trideuteromethoxylation product

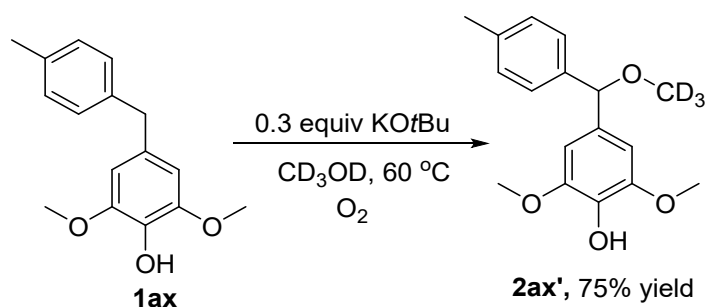

**Figure S8.** The synthesis of **2ax'**

Substrate **1ax** (77 mg, 0.3 mmol) was dissolved in 2 mL CD<sub>3</sub>OD. KOtBu (10 mg, 0.09 mmol) was added into the solution and stirred at 60 °C under oxygen balloon (1 bar). When the reaction finished in 24 h monitored by TLC, the mixture was

concentrated in vacuo to recover CD<sub>3</sub>OD and give a residue. Then the resulting residue was purified by flash chromatography over silica gel (Petroleum ether/EtOAc = 7:1) to give **2ax'** as a yellow solid (65 mg, 75% yield).

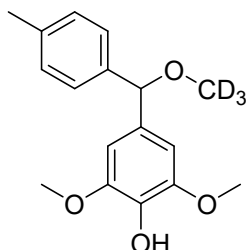

**2,6-Dimethoxy-4-((methoxy-d<sub>3</sub>)(p-tolyl)methyl)phenol (2ax')**, yellow oil, purification by flash column chromatography (eluent: PE/EA = 7/1), 65 mg (75% yield). <sup>1</sup>H NMR (400 MHz, CDCl<sub>3</sub>): δ 7.21 (d, *J* = 8.0 Hz, 2H), 7.13 (d, *J* = 8.0 Hz, 2H), 6.57 (s, 2H), 5.46 (s, 1H), 5.13 (s, 1H), 3.86 (s, 6H), 2.33 (s, 3H). <sup>13</sup>C NMR (150 MHz, CDCl<sub>3</sub>): δ 147.0, 139.1, 137.1, 133.9, 133.4, 129.1, 126.8, 103.6, 85.2, 56.3, 56.0 (m), 21.1. HRMS (ESI) *m/z*: [M + Na]<sup>+</sup> Calcd for C<sub>17</sub>H<sub>17</sub>D<sub>3</sub>O<sub>4</sub>Na 314.1448; Found 314.1441.

## 5. Applications

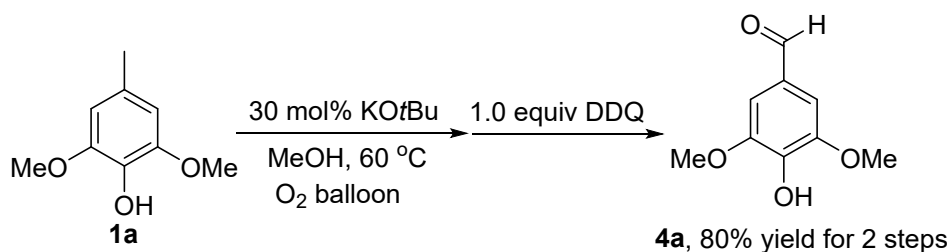

**Figure S9.** The synthesis of **4a**

To a solution of substrate **1a** (50 mg, 0.3 mmol) in 2 mL MeOH, KOtBu (10 mg, 0.09 mmol) was added. The mixture was stirred at 60 °C under oxygen balloon (1 bar). When the reaction finished in 24 h monitored by TLC, DDQ (68 mg, 0.3 mmol) was added to the reaction solution and stirred at 60 °C for 12 h. After that, the mixture was concentrated in vacuo to recover MeOH and give a residue. Then the resulting residue was purified by flash chromatography over silica gel (Petroleum ether/ EtOAc = 2:1)

to give **2a** as a white solid (44 mg, 80% yield for 2 steps).

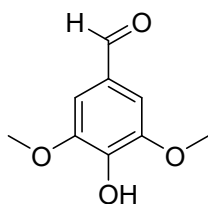

**4-Hydroxy-3,5-dimethoxybenzaldehyde (4a)**, white solid, purification by flash column chromatography (eluent: PE/EA = 2/1), 44 mg (80% yield for 2 steps).  $^1\text{H NMR}$  (400 MHz,  $\text{CDCl}_3$ ):  $\delta$  9.83 (s, 1H), 7.16 (s, 2H), 6.07 (s, 1H), 3.98 (s, 6H).  $^{13}\text{C NMR}$  (150 MHz,  $\text{CDCl}_3$ ):  $\delta$  190.8, 147.4, 140.8, 128.4, 106.7, 56.5.<sup>[6]</sup>

## 6. Gram-scale reaction

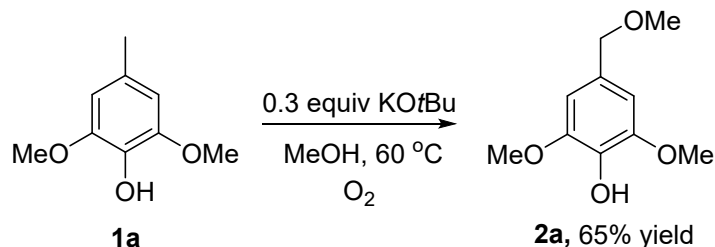

**Figure S10.** Gram-scale reaction

Under  $\text{O}_2$  atmosphere, substrate **1a** (1.01 g, 6 mmol) was dissolved in MeOH (20 mL). Then KOtBu (201 mg, 1.8 mmol) was added to the solution. The reaction mixture was stirred at 60 °C under  $\text{O}_2$  atmosphere. After the reaction was completed in 24 h monitored by TLC, the reaction was quenched with 150 mL  $\text{H}_2\text{O}$ . Then the mixture was concentrated in vacuo to recover MeOH and give a residue. The resulting residue was purified by flash chromatography over silica gel (Petroleum ether/ EtOAc = 4:1) to give **2a** as a yellow solid (0.77 g, 65% yield).

## 7. Mechanistic Study

## 7.1 TEMPO as additive

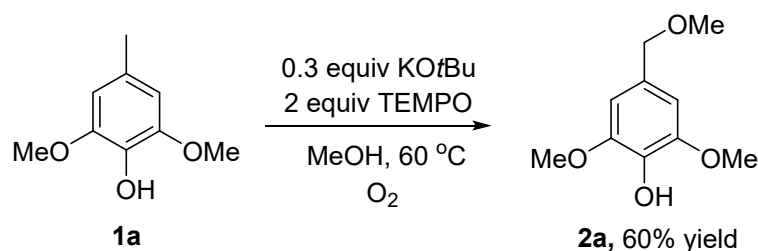

**Figure S11.** The reaction of **1a** with TEMPO.

KOtBu (10 mg, 0.09 mmol) was added into a mixture of substrate **1a** (50 mg, 0.3 mmol) and TEMPO (94 mg, 0.6 mmol) in MeOH (2 mL). Then the reaction mixture was stirred at 60 °C under O<sub>2</sub> atmosphere for 24 h. MeOH was evaporated under reduced pressure after the mixture was cooled to room temperature. Then the resulting residue was purified by flash chromatography over silica gel (Petroleum ether/ EtOAc = 4:1) to give **2a** as a yellow solid (36 mg, 60% yield).

## 7.2 Ethene-1,1-diyldibenzene as additive

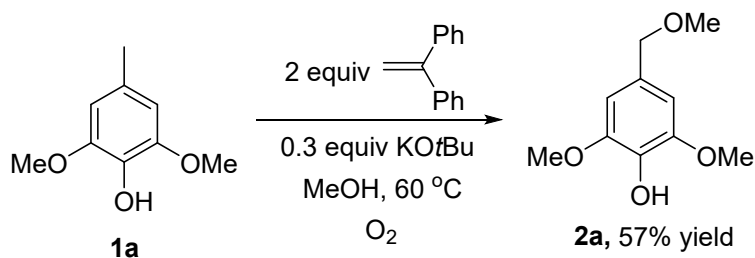

**Figure S12.** The reaction of **1a** with ethene-1,1-diyldibenzene.

KOtBu (10 mg, 0.09 mmol) was added into a mixture of substrate **1a** (50 mg, 0.3 mmol) and ethene-1,1-diyldibenzene (108 mg, 0.6 mmol) in MeOH (2 mL). Then the reaction mixture was stirred at 60 °C under O<sub>2</sub> atmosphere. When the reaction proceeded in 24 h, the mixture evaporated under reduced pressure. The resulting residue was purified by flash chromatography over silica gel (Petroleum ether/ EtOAc = 4:1) to give **2a** as a yellow solid (34 mg, 57% yield).

## 7.3 EPR experiments

The first oven-dried schlenk tube equipped with a stir bar was loaded with MeOH (2 mL), and KOtBu (10 mg, 0.09 mmol). The second and the third oven-dried schlenk

tube with a stir bar was loaded with MeOH (2 mL), and KO $t$ Bu (10 mg, 0.09 mmol), and 2,6-dimethoxy-4-methylphenol **1a** (50 mg, 0.3 mmol). The three mixtures were stirred under standard condition for 10 h. And the two solutions were analyzed by EPR respectively.

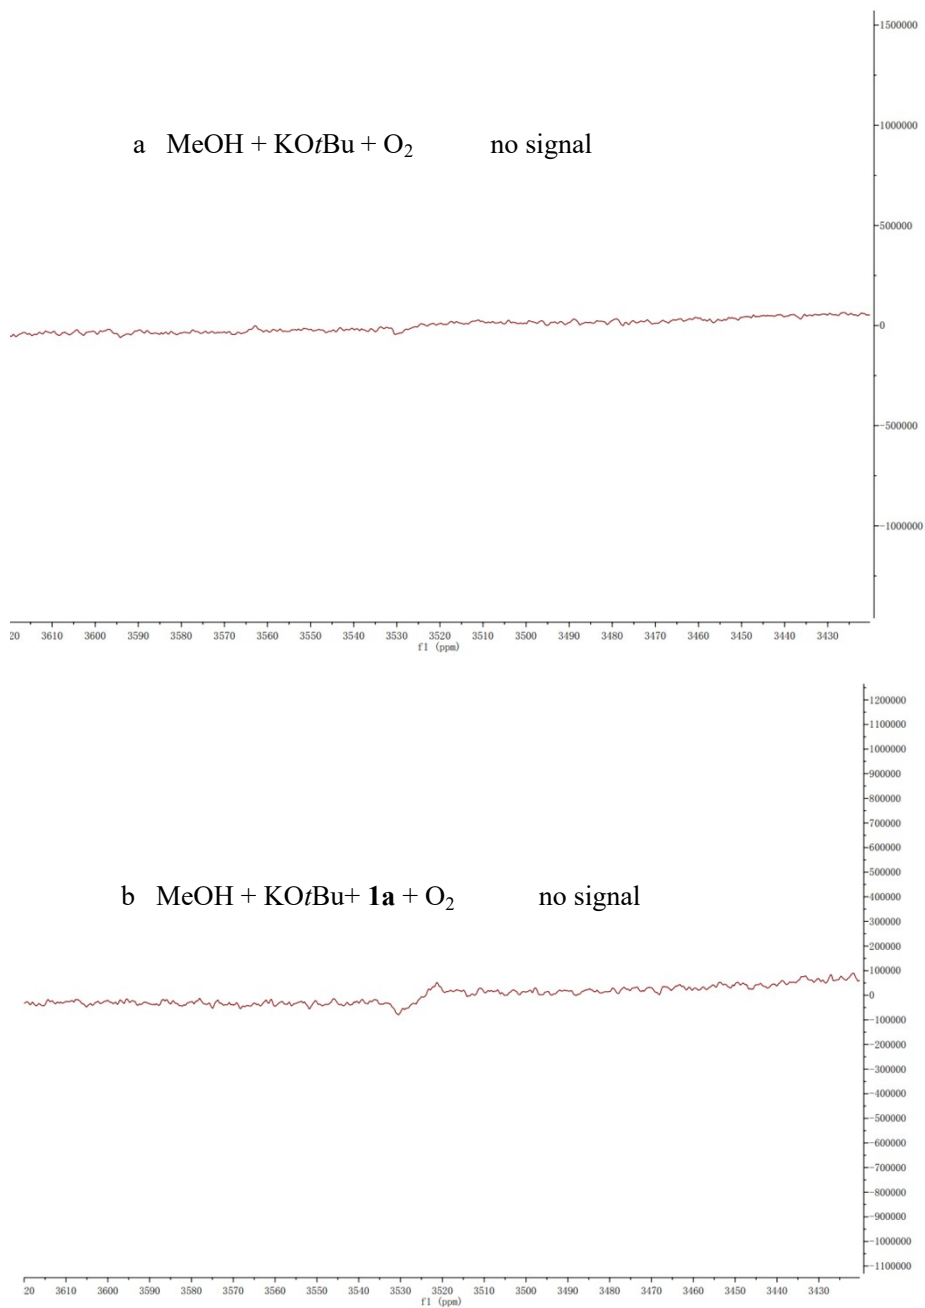

**Figure S13.** The EPR spectrum.

#### 7.4 The changes of substrate **1a** and methoxylated products **2a** with time

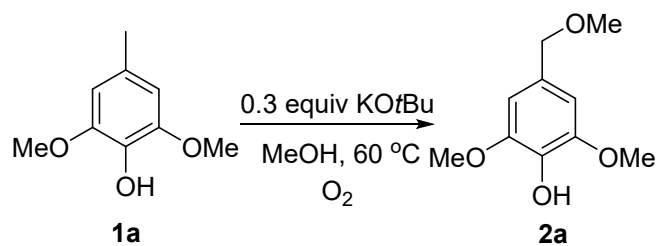

| m (1a) | s (1a)  | m<br>(Mesitylene) | s<br>(Mesitylene) | s (1a)/s<br>(Mesitylene) | m (1a)/m<br>(Mesitylene) |
|--------|---------|-------------------|-------------------|--------------------------|--------------------------|
| 0      | 0       | 0                 | 0                 | 0                        | 0                        |
| 15.5   | 508.80  | 30.6              | 1809.50           | 0.2812                   | 0.5065                   |
| 20.6   | 740.26  | 30.4              | 1818.33           | 0.4071                   | 0.6776                   |
| 30.8   | 1169.99 | 29.8              | 2004.46           | 0.5837                   | 1.0336                   |
| 45.9   | 1686.38 | 32.6              | 2085.24           | 0.8087                   | 1.4080                   |

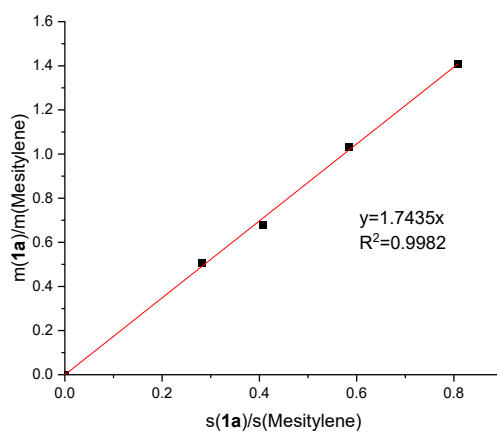

**Figure S14** Standard curve of **1a**

| m (2a) | s (2a)  | m<br>(Mesitylene) | s<br>(Mesitylene) | s (2a)/s<br>(Mesitylene) | m (2a)/m<br>(Mesitylene) |
|--------|---------|-------------------|-------------------|--------------------------|--------------------------|
| 0      | 0       | 0                 | 0                 | 0                        | 0                        |
| 17.2   | 496.30  | 30.6              | 1809.50           | 0.2743                   | 0.5621                   |
| 21.1   | 638.98  | 30.4              | 1818.33           | 0.3498                   | 0.6941                   |
| 30.5   | 990.38  | 29.8              | 2004.46           | 0.4941                   | 1.0235                   |
| 45.4   | 1420.15 | 32.6              | 2085.24           | 0.6810                   | 1.3926                   |

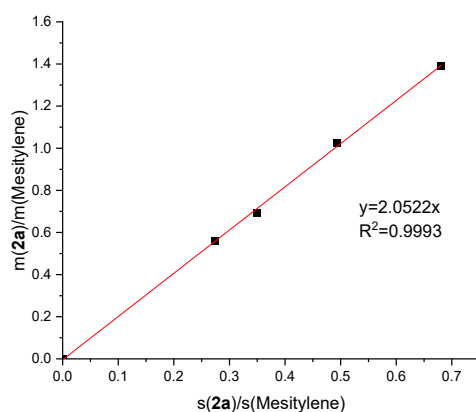

**Figure S15** Standard curve of **2a**.

Each of oven-dried flasks equipped with a stir bar was loaded with MeOH (2 mL), KOtBu (10 mg, 0.09 mmol) and substrate **1a** (50 mg, 0.3 mmol). Then the reaction mixtures were stirred at 60 °C under O<sub>2</sub> atmosphere. The mixtures proceeded in 1 h, 2 h, 3.5 h, 4 h, 5 h, 10 h, 15 h and 20 h respectively. The mixtures were analyzed by GC for quantitative study.

## 7.5 The study of reaction kinetics mechanism

$$([S] = [C_A/C_{A0}])$$

| Time (h) | [S]     | ln[S]    | 1/[S]    |
|----------|---------|----------|----------|
| 0        | 1.00000 | 0.00000  | 1.00000  |
| 1        | 0.83228 | -0.18359 | 1.20152  |
| 2        | 0.77118 | -0.25984 | 1.29672  |
| 3.5      | 0.65544 | -0.42245 | 1.52570  |
| 4        | 0.63796 | -0.44948 | 1.56750  |
| 5        | 0.44821 | -0.80248 | 2.23108  |
| 10       | 0.23088 | -1.46587 | 4.33132  |
| 15       | 0.17609 | -1.73678 | 5.67901  |
| 20       | 0.07213 | -2.62922 | 13.86301 |



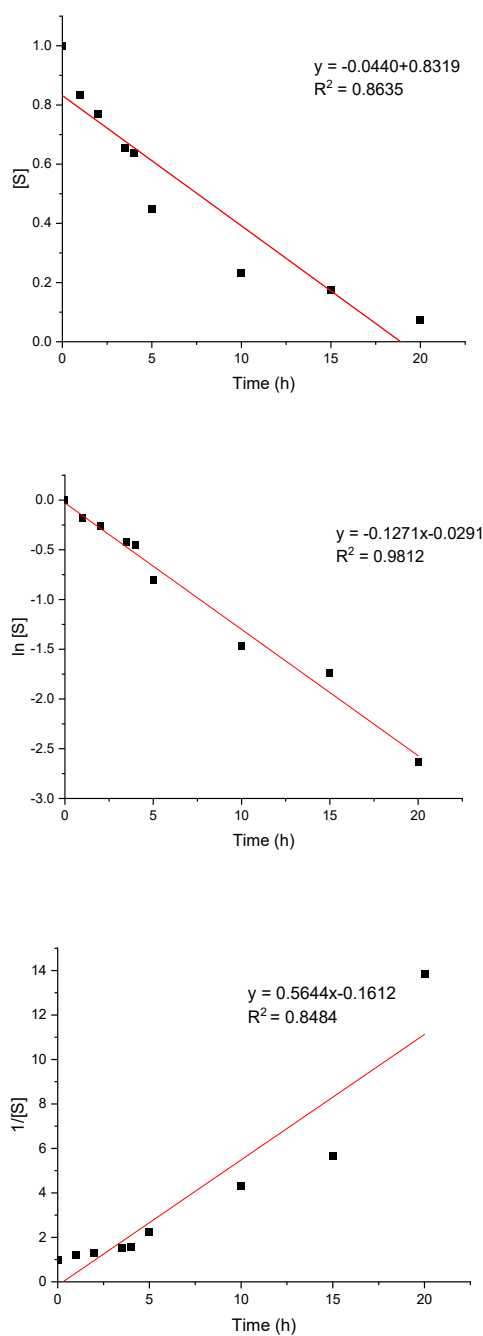

**Figure S16** Reaction rate curve of **1a**.

## 7.6 HPLC method and results

The detection of  $\text{H}_2\text{O}_2$  was worked on an Agilent 1260 Infinity equipped with a DAD-3000 diode array detector high performance liquid chromatography (HPLC). The separation was conducted using Agilent Zorbax C18 (4.6 x 250 mm) column. The mobile phase consisted of 0.1% phosphoric acid in water (A) and methanol (B) in a

gradient elution programmed as follows: 0–5 min, maintain at 8% B; 5–18 min, linear gradient from 8% to 60% B; 18–22 min, linear gradient from 60% to 8% B. The solvent flow rate was 0.3 mL/min and the column oven temperature was 35 °C. The analysis was carried out within the wavelength interval of 190-400 nm and the optimal wavelength value for the detection of H<sub>2</sub>O<sub>2</sub> was 210 nm. The identification of compounds was carried out by comparing the retention time with the commercially available reference compound.

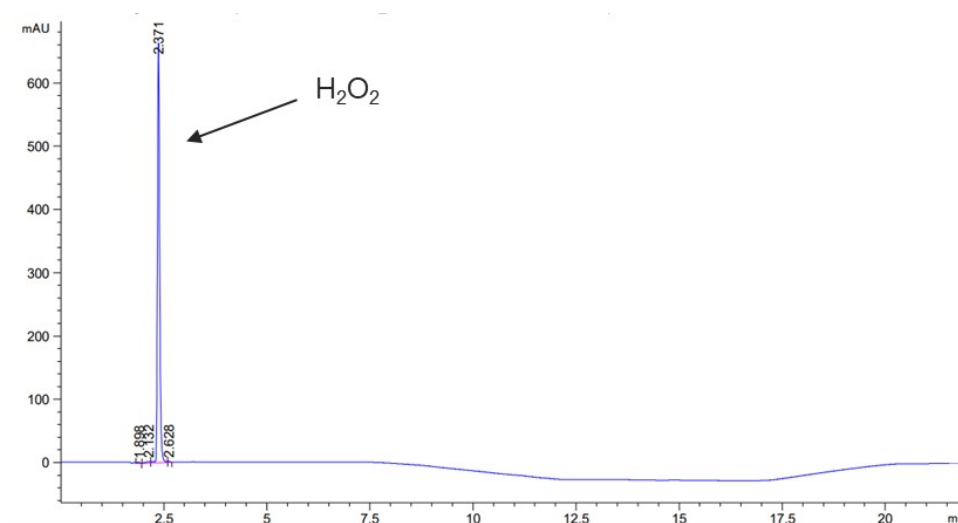

**Figure S17** HPLC spectra of hydrogen peroxide

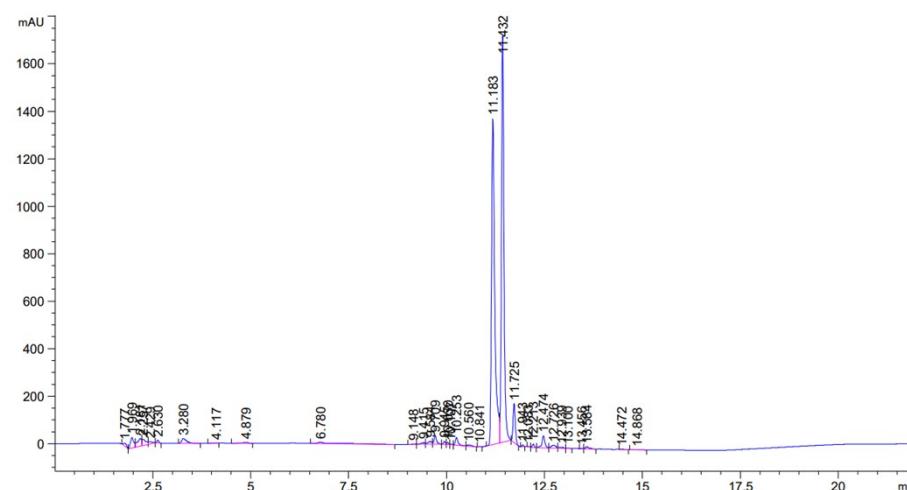

**Figure S18** HPLC spectra of reaction solution

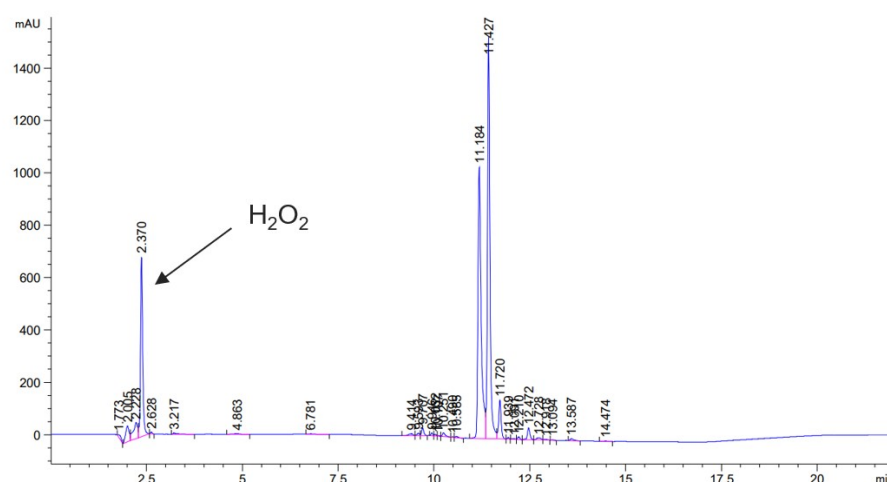

**Figure S19** HPLC spectra of the mixture with hydrogen peroxide added after the reaction

### 7.7 The procedure for preparing VII' and the corresponding methoxylated product 2w

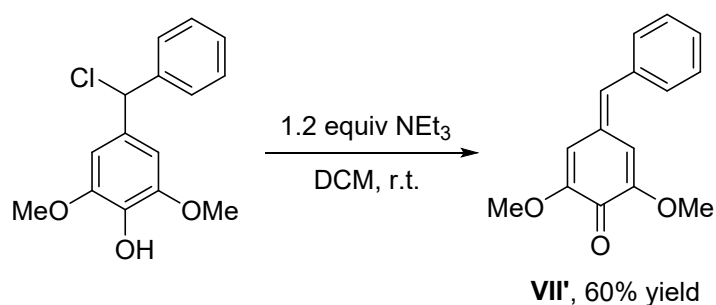

**Figure S20.** The synthesis of VII'

4-(Chloro(phenyl)methyl)-2,6-dimethoxyphenol (1.11 g, 4.0 mmol) was dissolved in 25 mL dry DCM under  $N_2$  atmosphere and  $NEt_3$  (490 mg, 4.8 mmol) was added. After the reaction finished in 2 h monitored by TLC, diethyl ether was added. The resulting precipitate was filtered off and dried under reduced pressure. The desired product was obtained as a yellow solid (581 mg, 60% yield).<sup>[7]</sup>

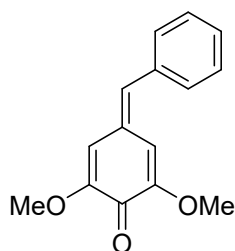

**4-Benzylidene-2,6-dimethoxycyclohexa-2,5-dien-1-one (VII')**, yellow solid, 581 mg (60% yield). <sup>1</sup>H NMR (400 MHz, CDCl<sub>3</sub>): δ 7.46 – 7.43 (m, 4H), 7.42 – 7.36 (m, 1H), 7.16 (s, 1H), 6.86 (d, *J* = 1.6 Hz, 1H), 6.41 (d, *J* = 1.6 Hz, 1H), 3.84 (s, 3H), 3.78 (s, 3H). <sup>13</sup>C NMR (150 MHz, CDCl<sub>3</sub>): δ 175.4, 153.6, 152.1, 140.8, 136.1, 130.2, 130.1, 129.0, 128.9, 112.7, 105.6, 55.64, 55.61. HRMS (EI) *m/z*: [M]<sup>+</sup> Calcd for C<sub>15</sub>H<sub>14</sub>O<sub>3</sub> 242.0943; Found 242.0946.

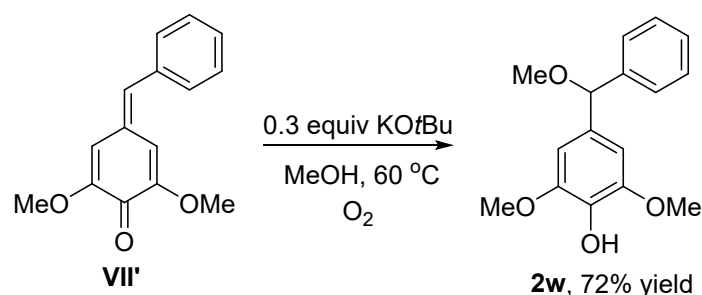

**Figure S21.** The synthesis of **2w** from **VII'**

KOtBu (10 mg, 0.09 mmol) was added into a mixture of 4-benzylidene-2,6-dimethoxycyclohexa-2,5-dien-1-one (73 mg, 0.3 mmol) in MeOH (2 mL). The reaction mixture was stirred at 60 °C under O<sub>2</sub> atmosphere. The mixture was evaporated under reduced pressure after 3 h. The resulting residue was purified by flash chromatography over silica gel (Petroleum ether/ EtOAc = 7:1) to give **2w** as a yellow solid (59 mg, 72% yield).

## 8. Reference

- [1] Y. Guo, X.-M. Fan, M. Nie, H.-W. Liu, D.-H. Liao, X.-D. Pan, Y.-F. Ji, *Eur. J. Org. Chem.*, 2015, **21**, 4744–4755.
- [2] L. Jing, H. Ma, P. Fan, Z. Jia, *Chem. Nat. Compd.*, 2017, **53**, 248-253.
- [3] L. Goclik, L. Offner-Marko, A. Bordet, W. Leitner, *Chem. Commun.*, 2020, 56, 9509-9512.
- [4] J. Wang, T. Wang, H. Du, N. Chen, *J. Org. Chem.*, 2023, **88**, 12572–12584.
- [5] J. M. Saá, A. Llobera, A. García-Raso, A. Costa, P. M. Deyá, *J. Org. Chem.* 1988, **53**, 4263–4273.
- [6] J.-A. Jiang, C. Chen, J.-G. Huang, H.-W. Liu, S. Cao and Y.-F. Ji, *Green Chem.*, 2014, **16**,

1248-1254.

[7] D. Richter, N. Hampel, T. Singer, A. R. Ofial and H. Mayr, *Eur. J. Org. Chem.*, 2009, 3203-3211.

## 9. $^1\text{H}$ and $^{13}\text{C}$ -NMR Spectra Data

**2,6-Diethoxy-4-methylphenol (1b)** [ $^1\text{H}$ -NMR\_400 MHz\_( $\text{CDCl}_3$ : 7.26 ppm)]

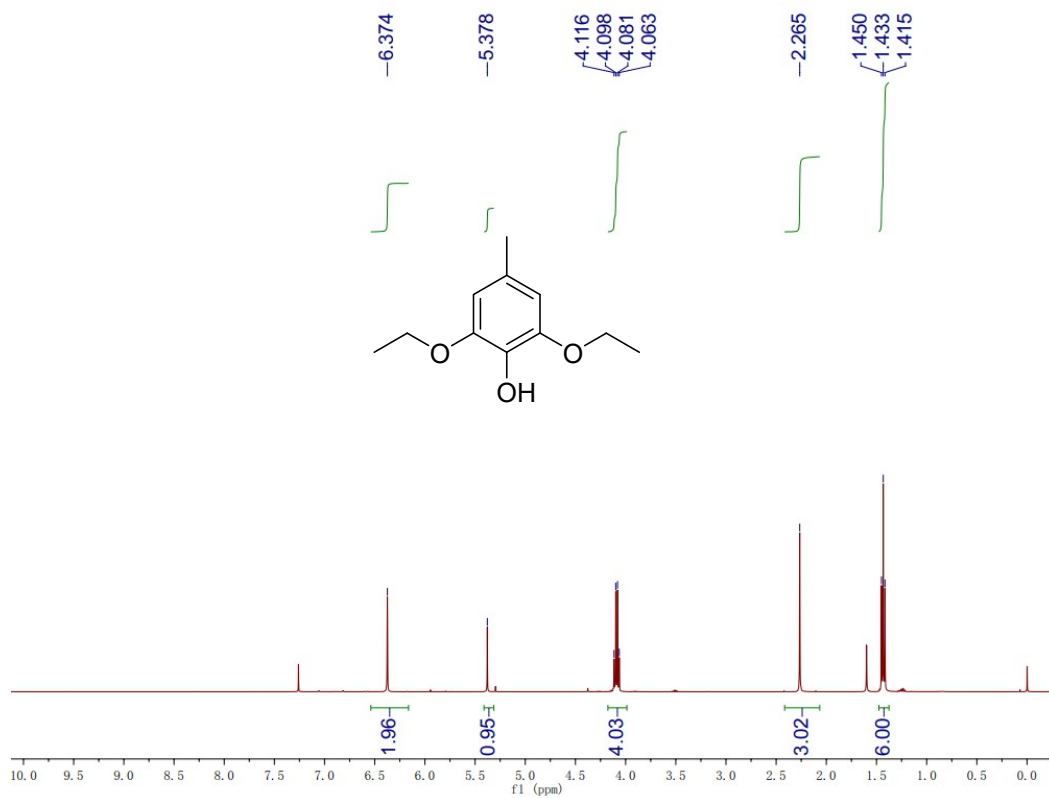

[ $^{13}\text{C}$ -NMR\_150 MHz\_( $\text{CDCl}_3$ : 77.00 ppm)]

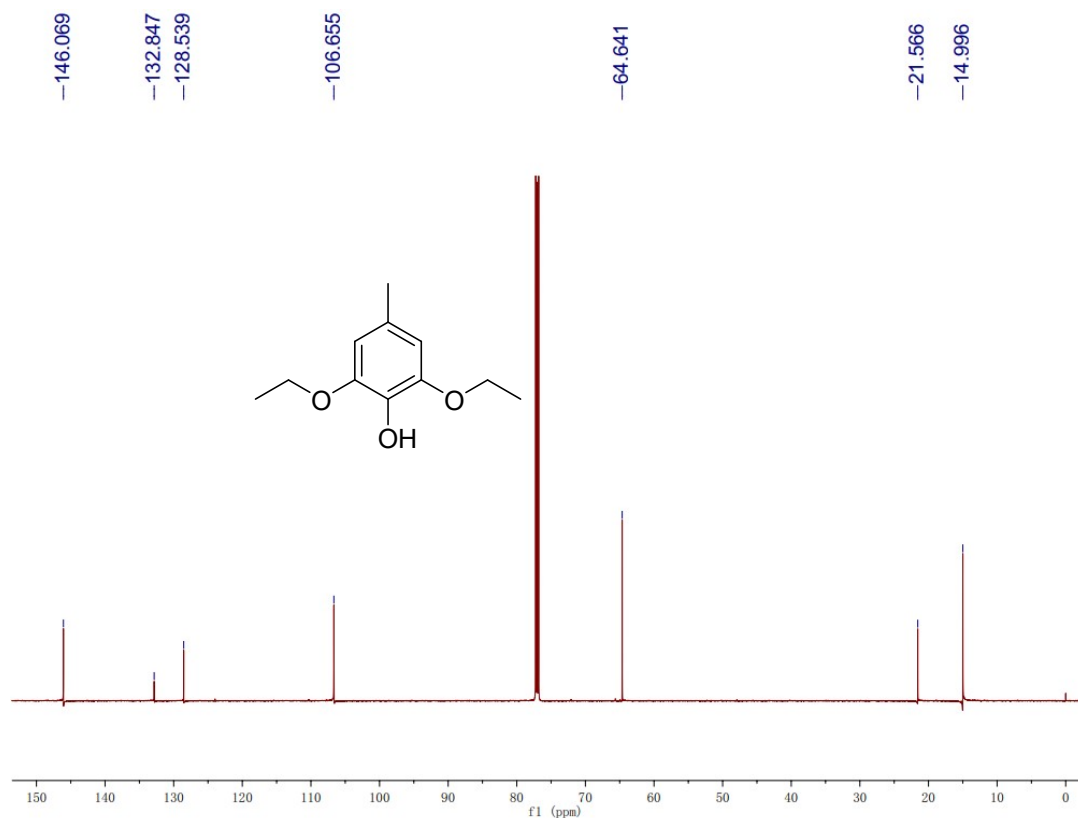

**4-Methyl-2,6-dipropoxyphenol (1c)** [ $^1\text{H}$ \_NMR\_400 MHz\_( $\text{CDCl}_3$ : 7.26 ppm)]

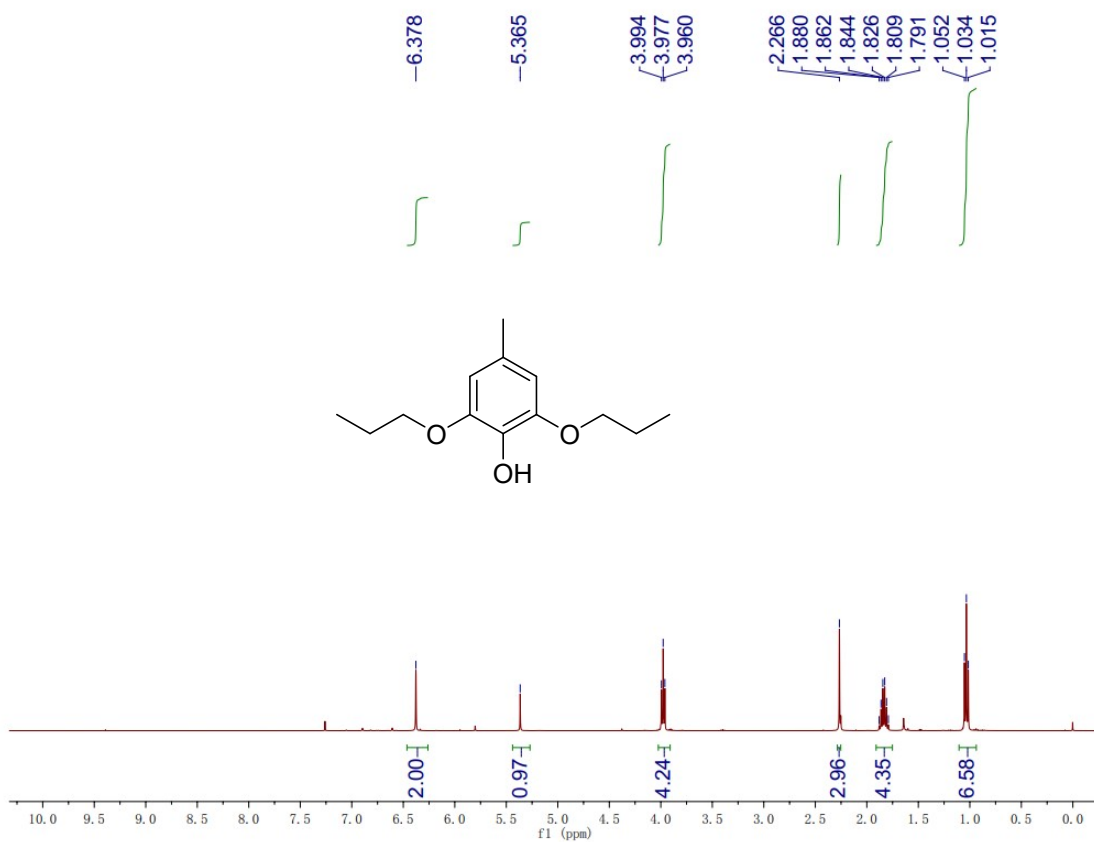

[ $^{13}\text{C}$ \_NMR\_150 MHz\_( $\text{CDCl}_3$ : 77.00 ppm)]

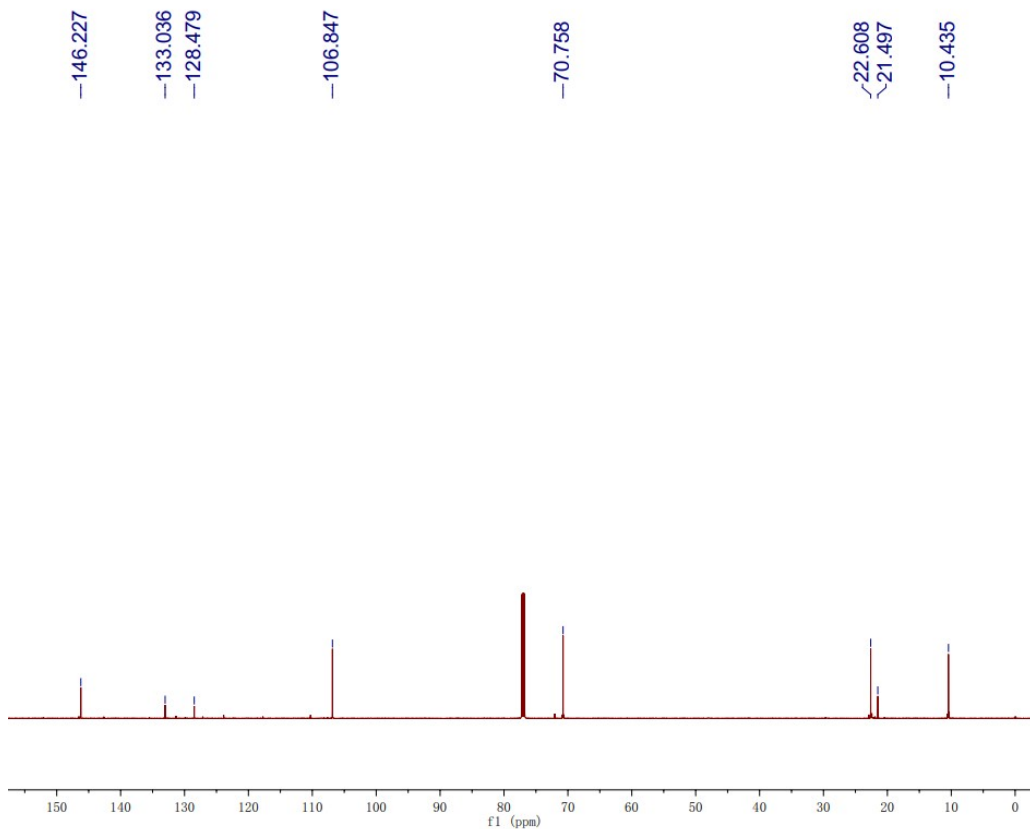

**2,6-Dibutoxy-4-methylphenol (1d) [<sup>1</sup>H\_NMR\_400 MHz\_(CDCl<sub>3</sub>: 7.26 ppm)]**

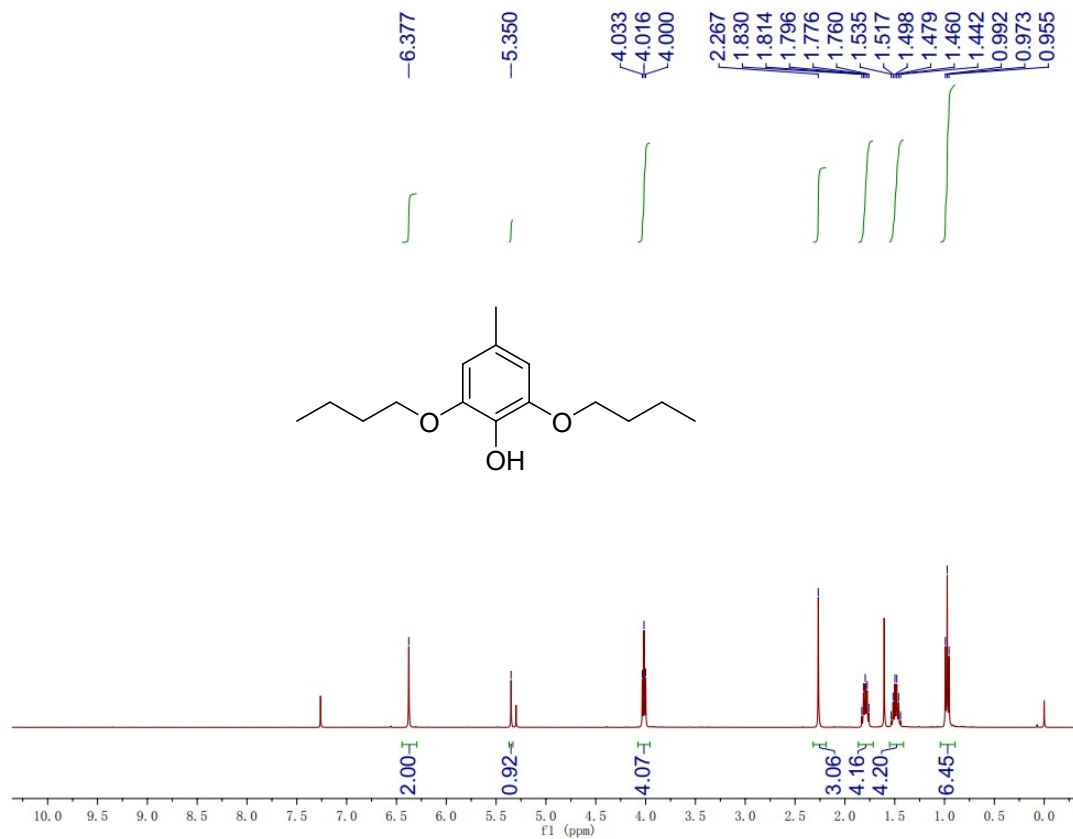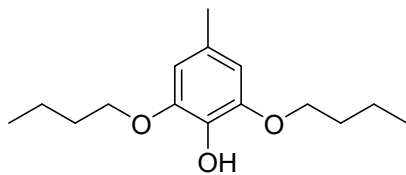

**[<sup>13</sup>C\_NMR\_150 MHz\_(CDCl<sub>3</sub>: 77.00 ppm)]**

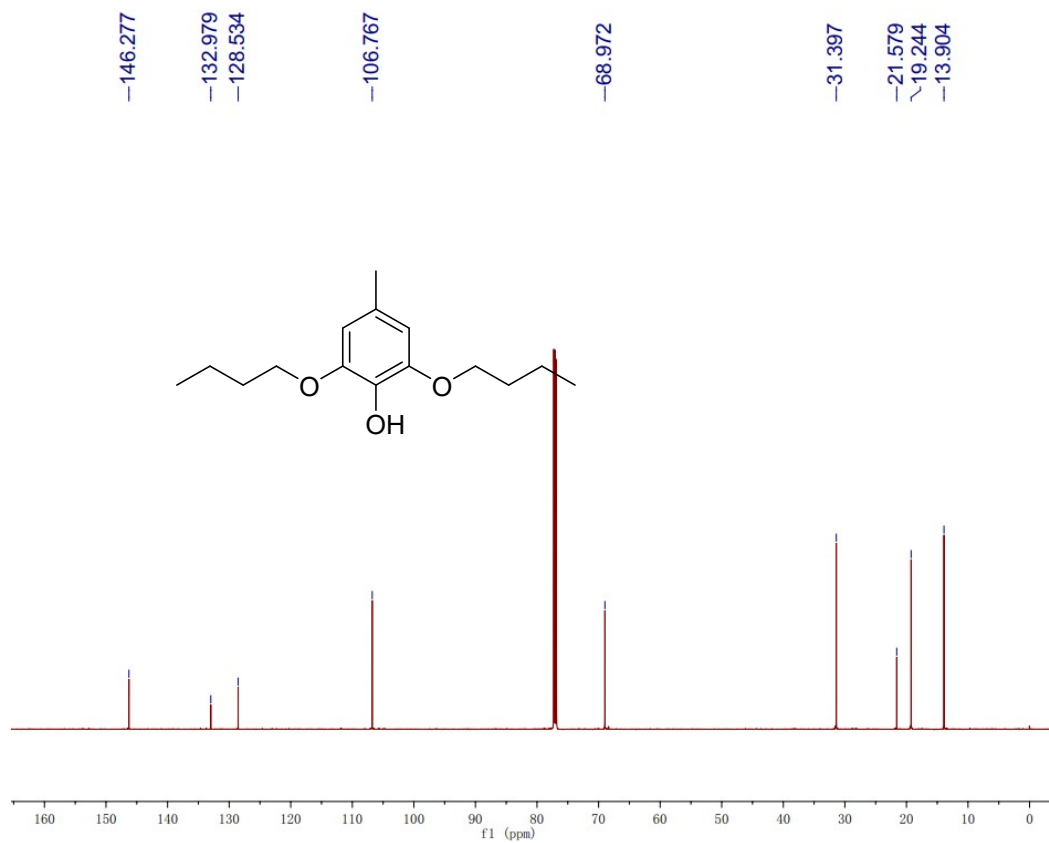

**2,6-Diisobutoxy-4-methylphenol (1e) [<sup>1</sup>H\_NMR\_400 MHz\_(CDCl<sub>3</sub>: 7.26 ppm)]**

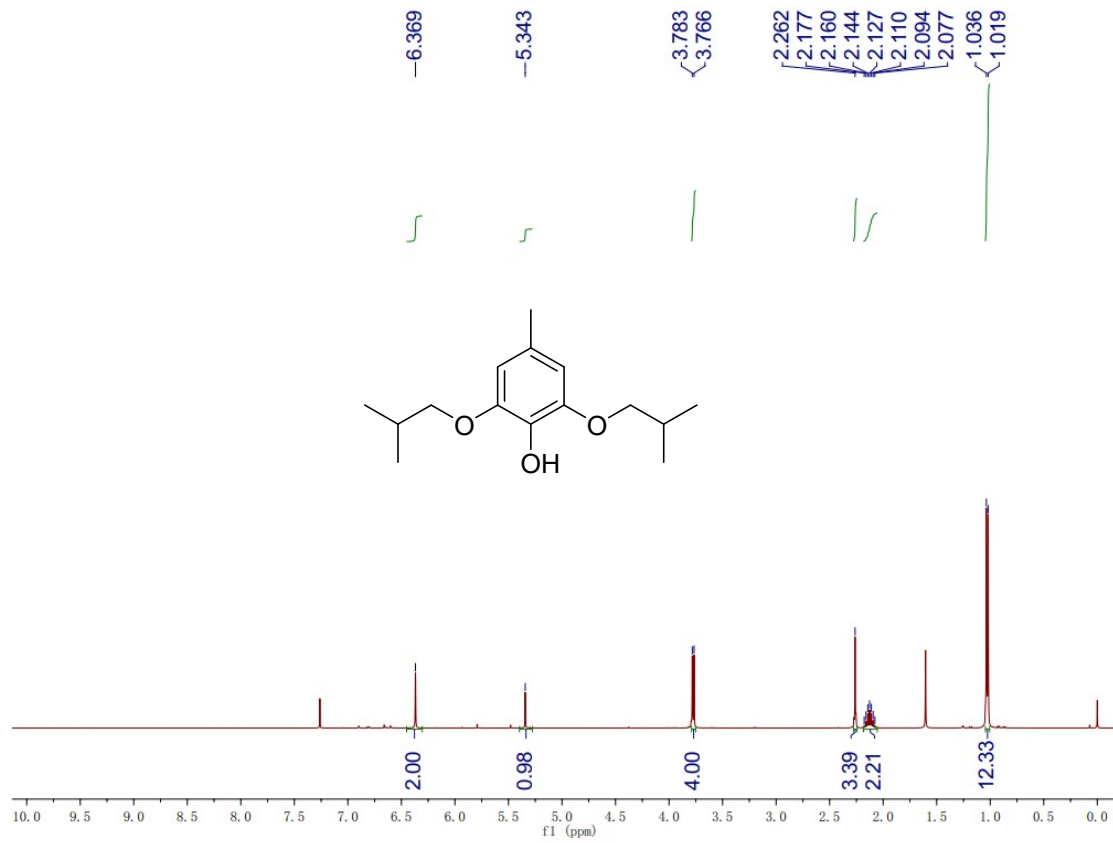

**[<sup>13</sup>C\_NMR\_150 MHz\_(CDCl<sub>3</sub>: 77.00 ppm)]**



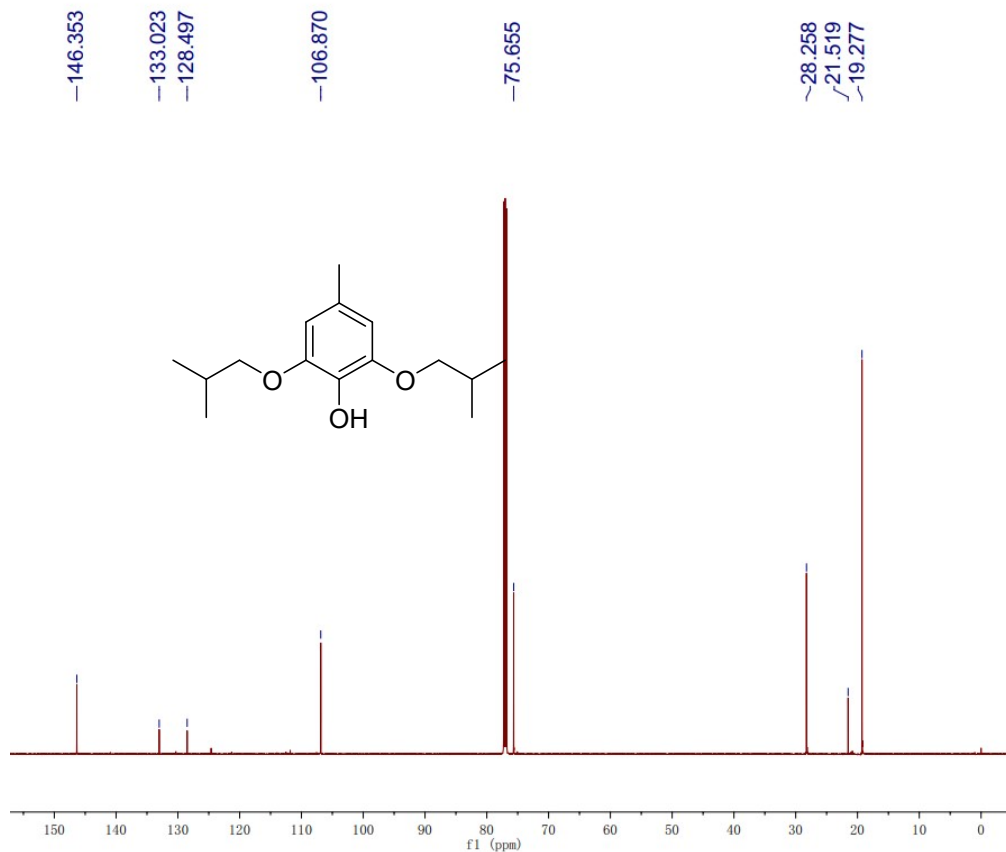

**2-Ethoxy-6-methoxy-4-methylphenol (1f)** [ $^1\text{H}$ \_NMR\_400 MHz\_( $\text{CDCl}_3$ : 7.26 ppm)]

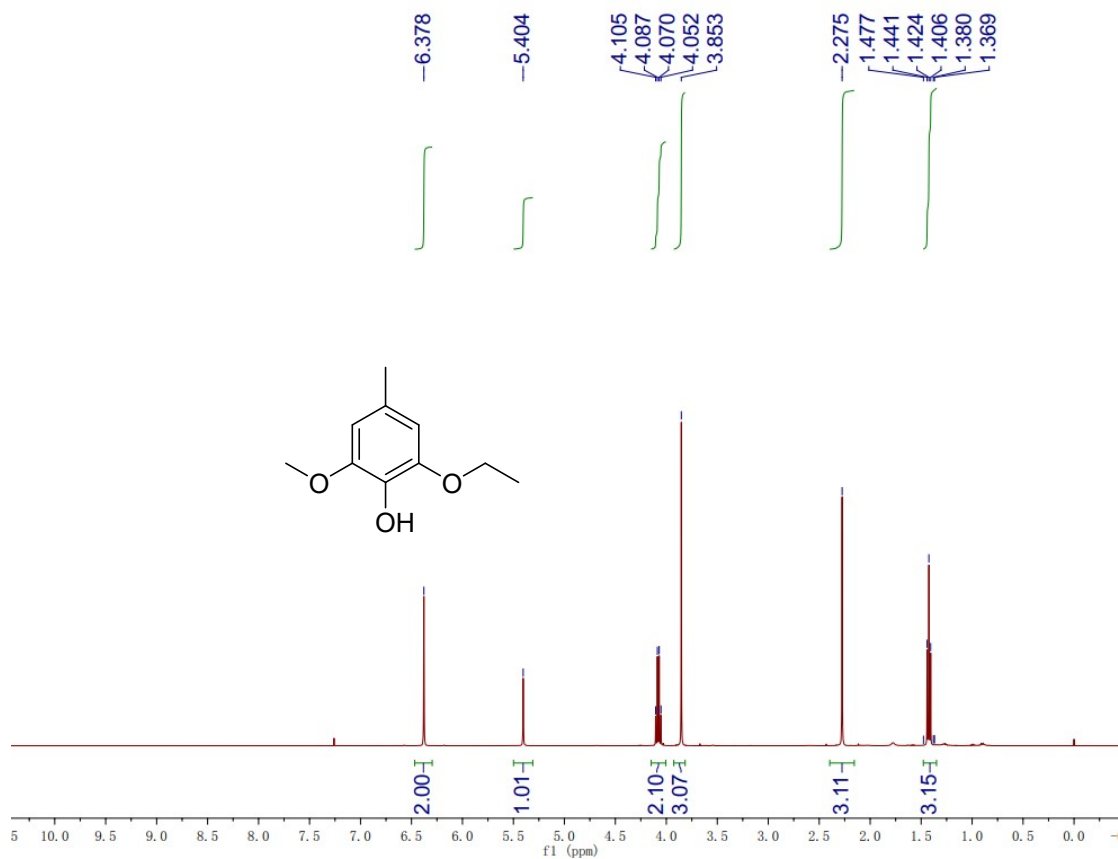

[ $^{13}\text{C}$ \_NMR\_100 MHz\_( $\text{CDCl}_3$ : 77.00 ppm)]

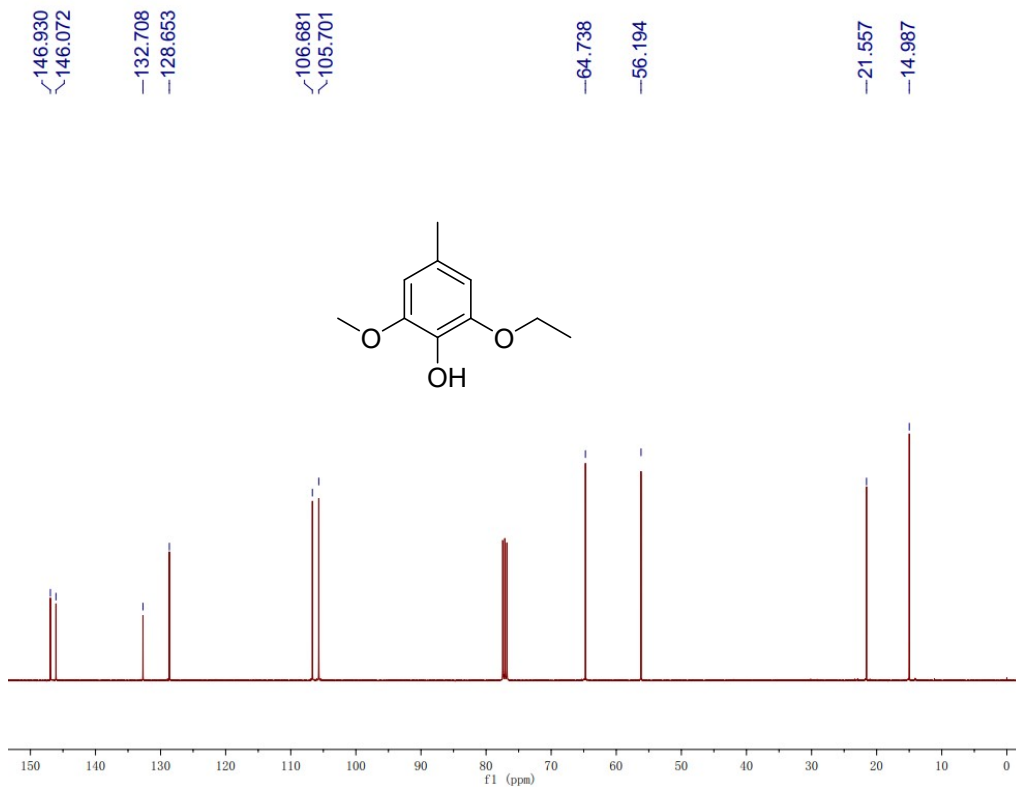

**2-Methoxy-4-methyl-6-propoxyphenol (1g)** [ $^1\text{H}$ \_NMR\_400 MHz\_( $\text{CDCl}_3$ : 7.26 ppm)]

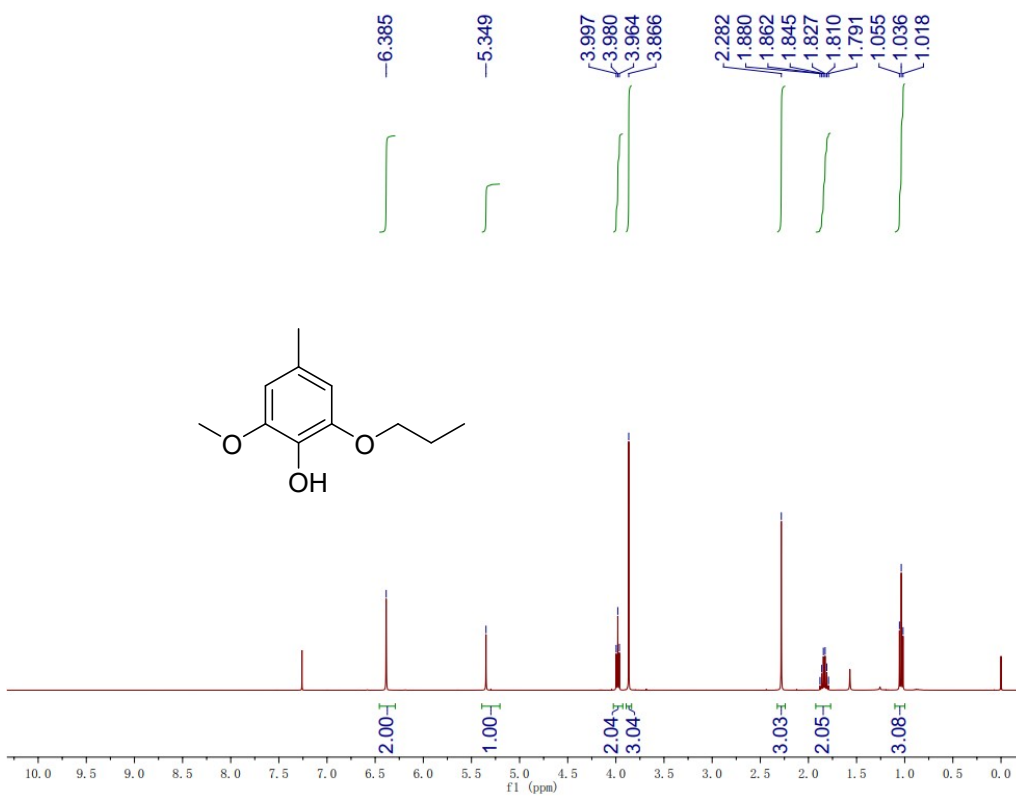

[ $^{13}\text{C}$ \_NMR\_100 MHz\_( $\text{CDCl}_3$ : 77.00 ppm)]

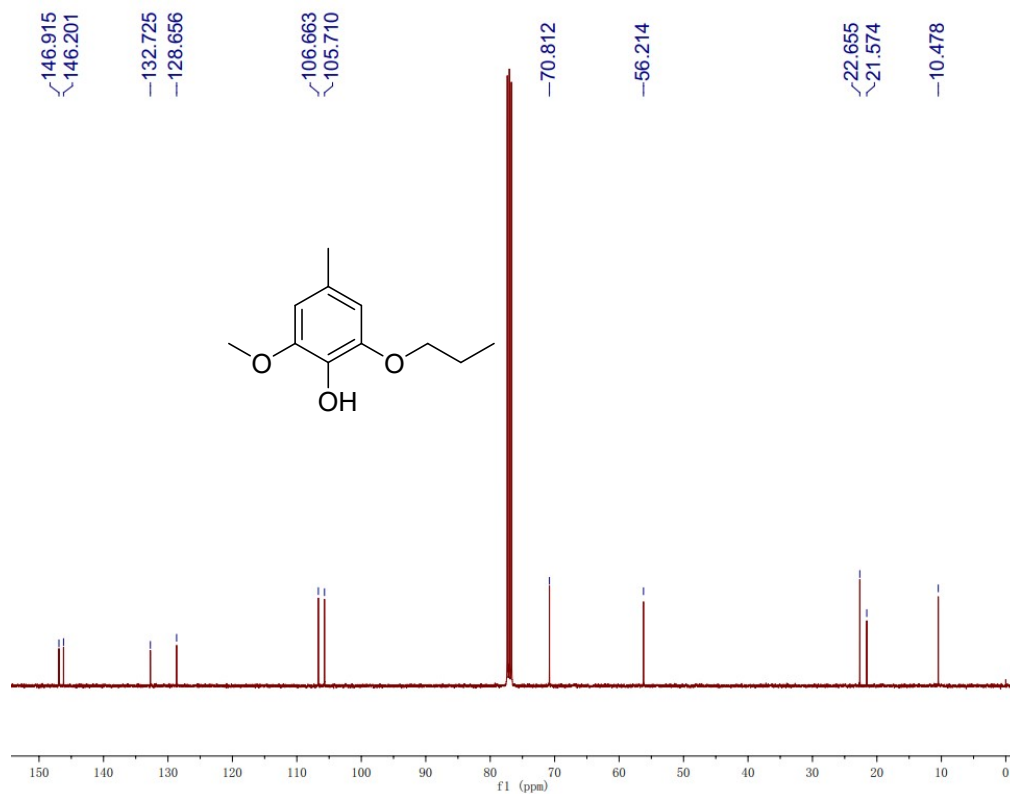

**2-Butoxy-6-methoxy-4-methylphenol (1h)** [ $^1\text{H}$ \_NMR\_600 MHz\_( $\text{CDCl}_3$ : 7.26 ppm)]

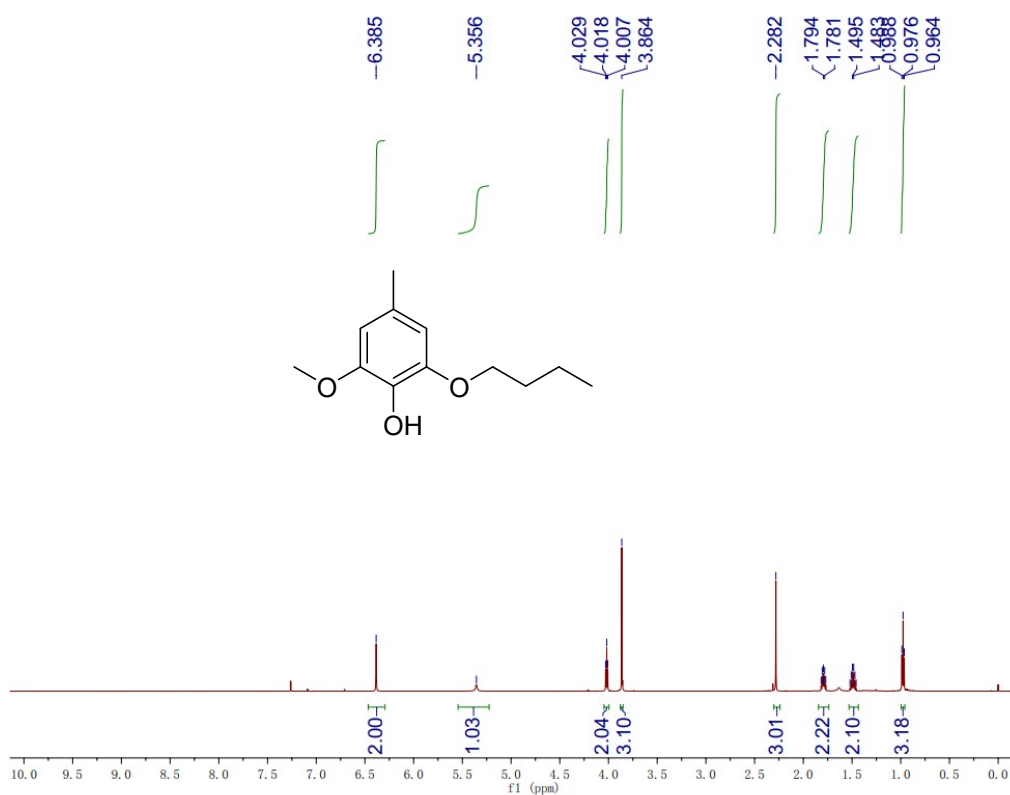

[ $^{13}\text{C}$ \_NMR\_150 MHz\_( $\text{CDCl}_3$ : 77.00 ppm)]

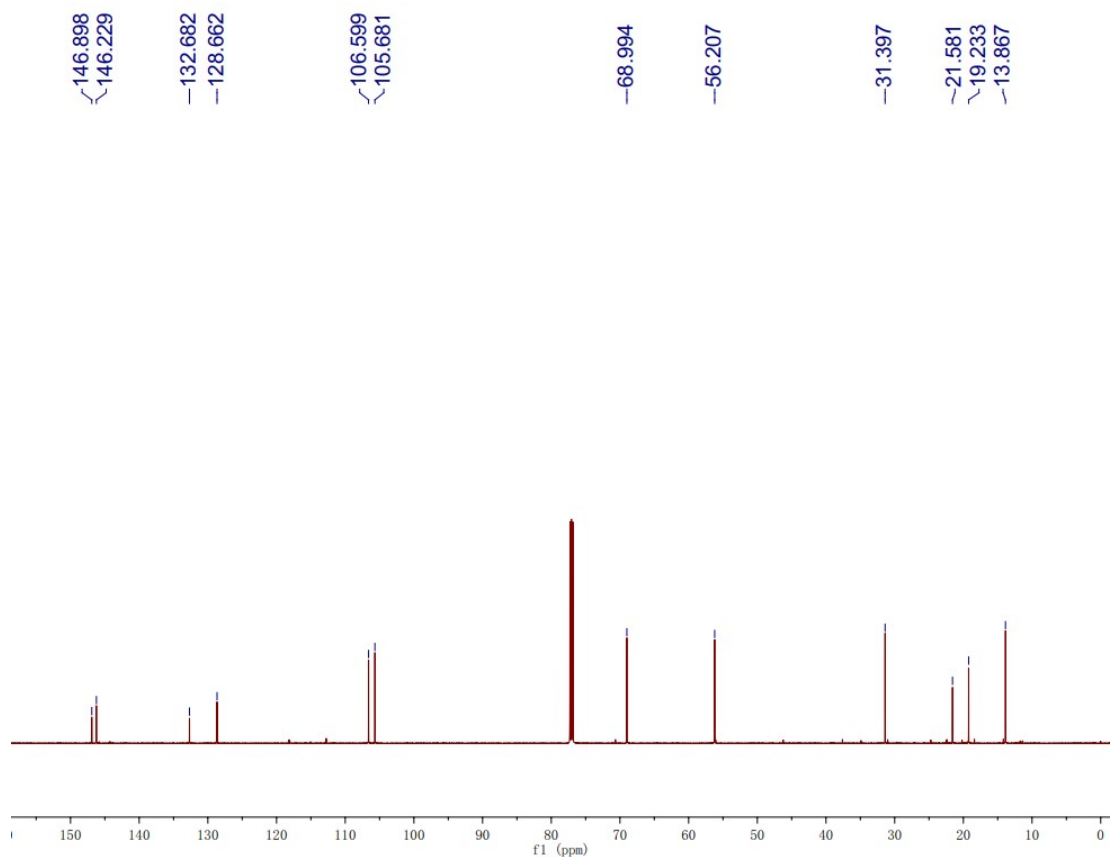

**2-Ethoxy-4,6-dimethylphenol (1i)** [<sup>1</sup>H\_NMR\_400 MHz\_(CDCl<sub>3</sub>: 7.26 ppm)]

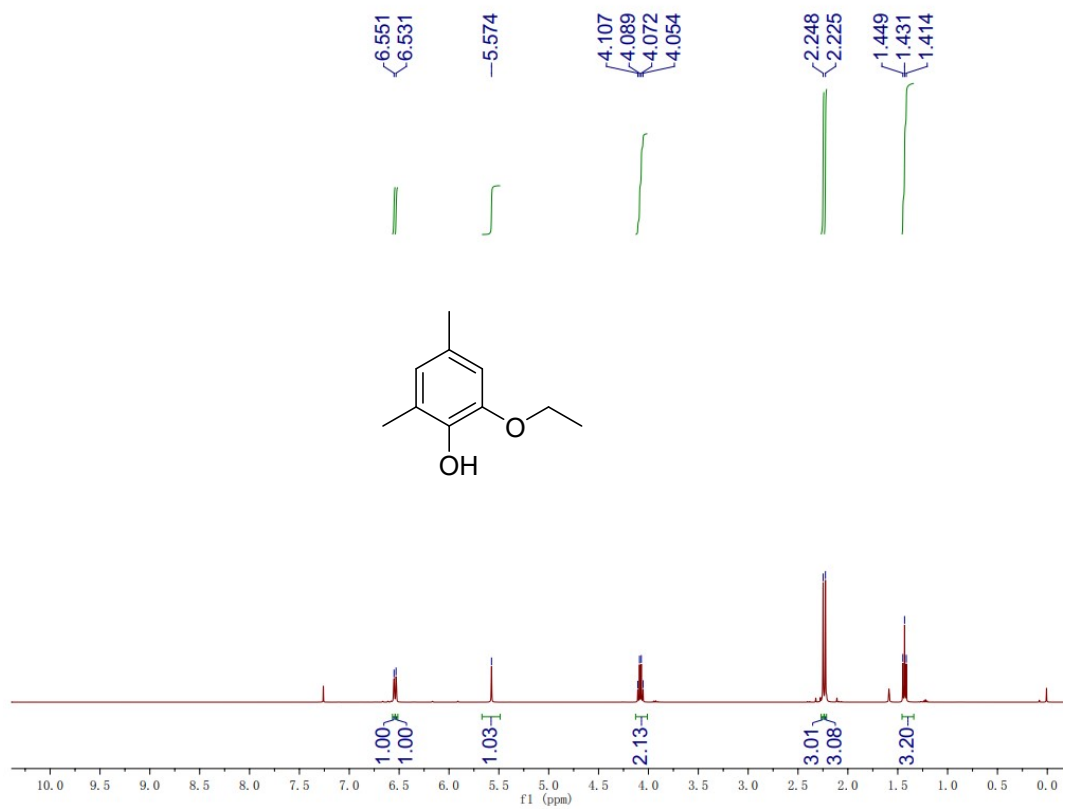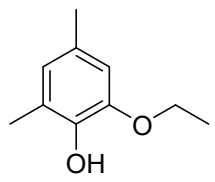

[<sup>13</sup>C\_NMR\_150 MHz\_(CDCl<sub>3</sub>: 77.00 ppm)]

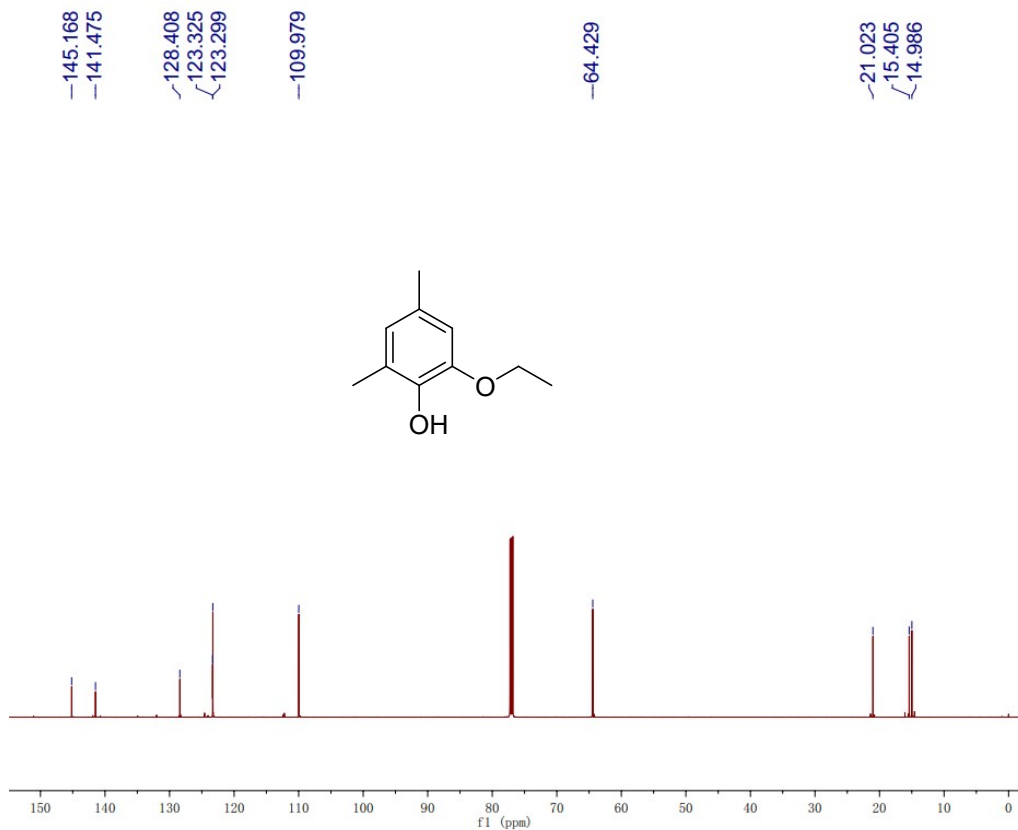

**2,4-Dimethyl-6-propoxyphenol (1j)** [<sup>1</sup>H\_NMR\_400 MHz\_(CDCl<sub>3</sub>: 7.26 ppm)]

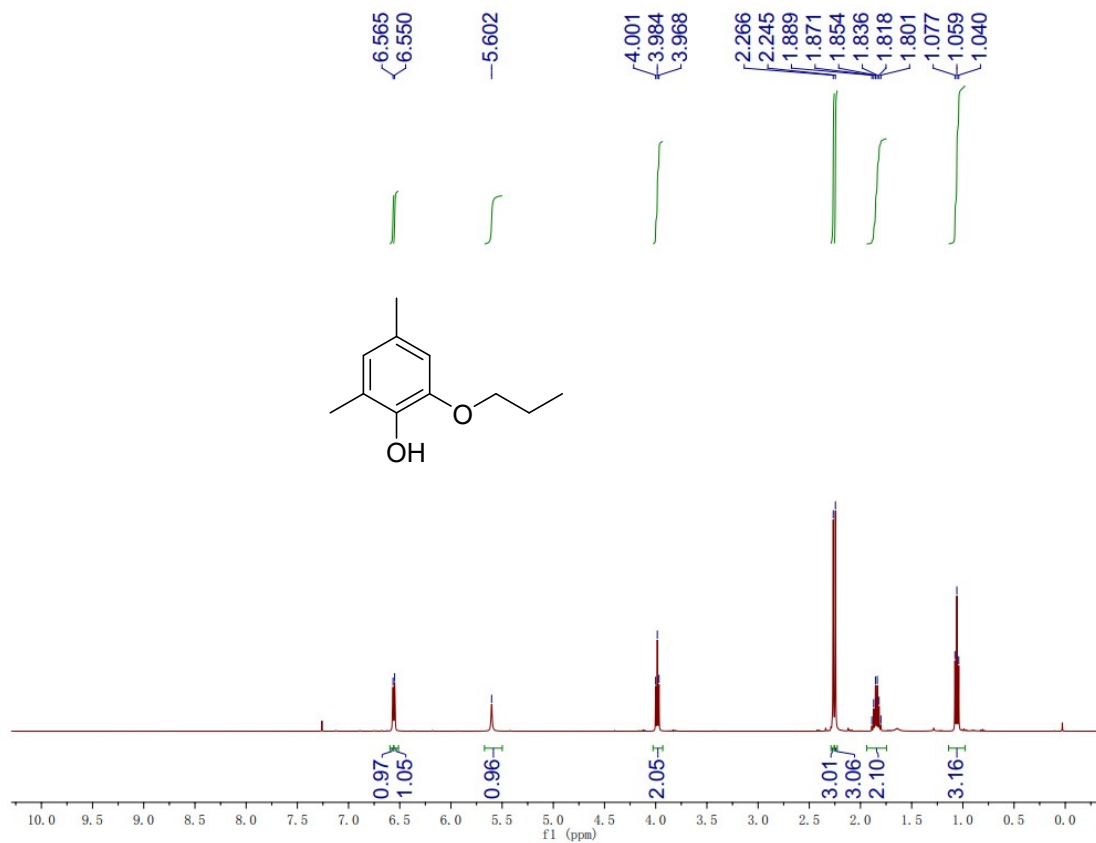

[<sup>13</sup>C\_NMR\_150 MHz\_(CDCl<sub>3</sub>: 77.00 ppm)]

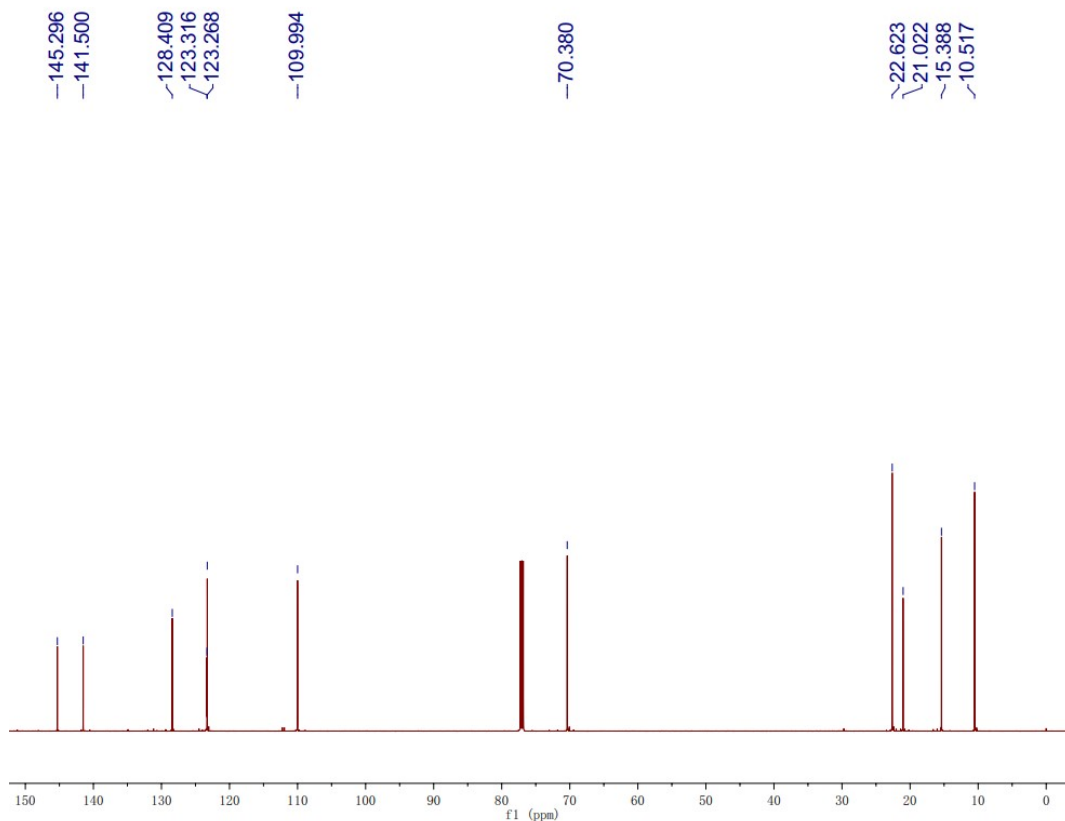

**2-Isopropoxy-4,6-dimethylphenol (1k) [<sup>1</sup>H\_NMR\_400 MHz\_(CDCl<sub>3</sub>: 7.26 ppm)]**

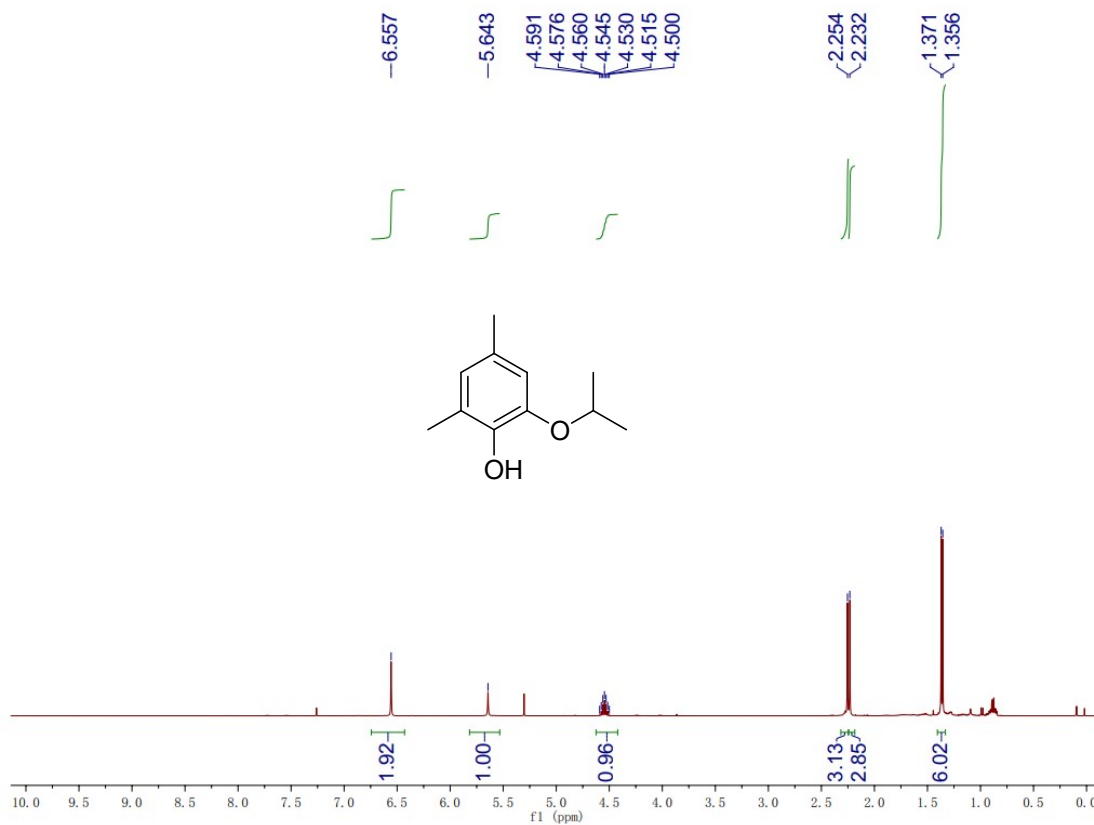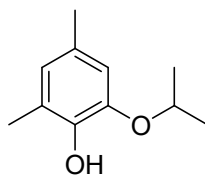

[<sup>13</sup>C\_NMR\_150 MHz\_(CDCl<sub>3</sub>: 77.00 ppm)]

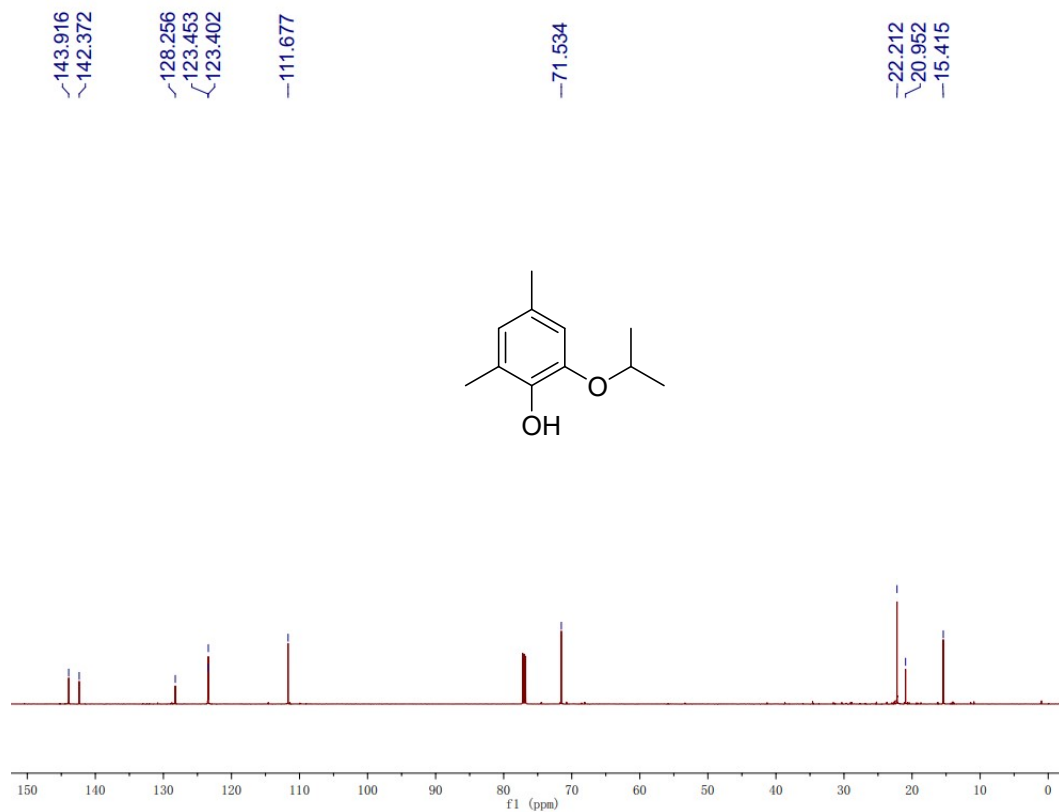

**2-Butoxy-4,6-dimethylphenol (11) [ $^1\text{H}$ \_NMR\_400 MHz\_( $\text{CDCl}_3$ : 7.26 ppm)]**

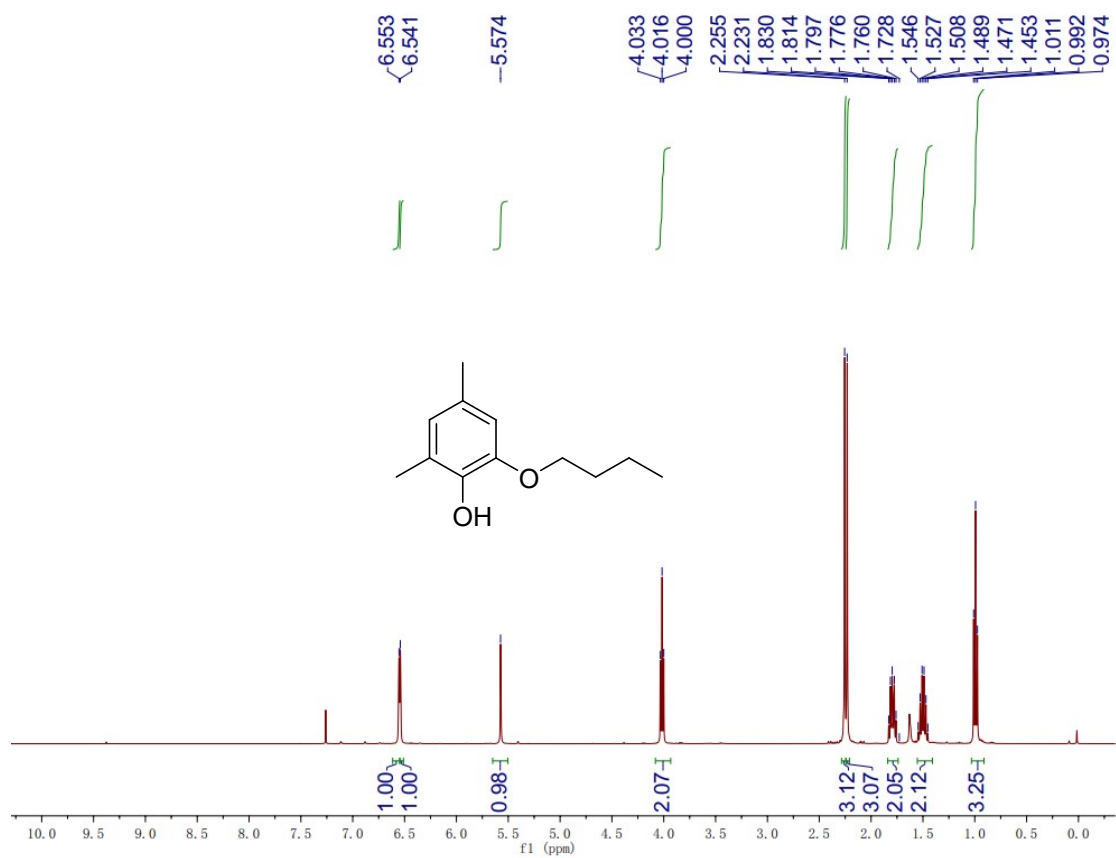

**[ $^{13}\text{C}$ \_NMR\_150 MHz\_( $\text{CDCl}_3$ : 77.00 ppm)]**

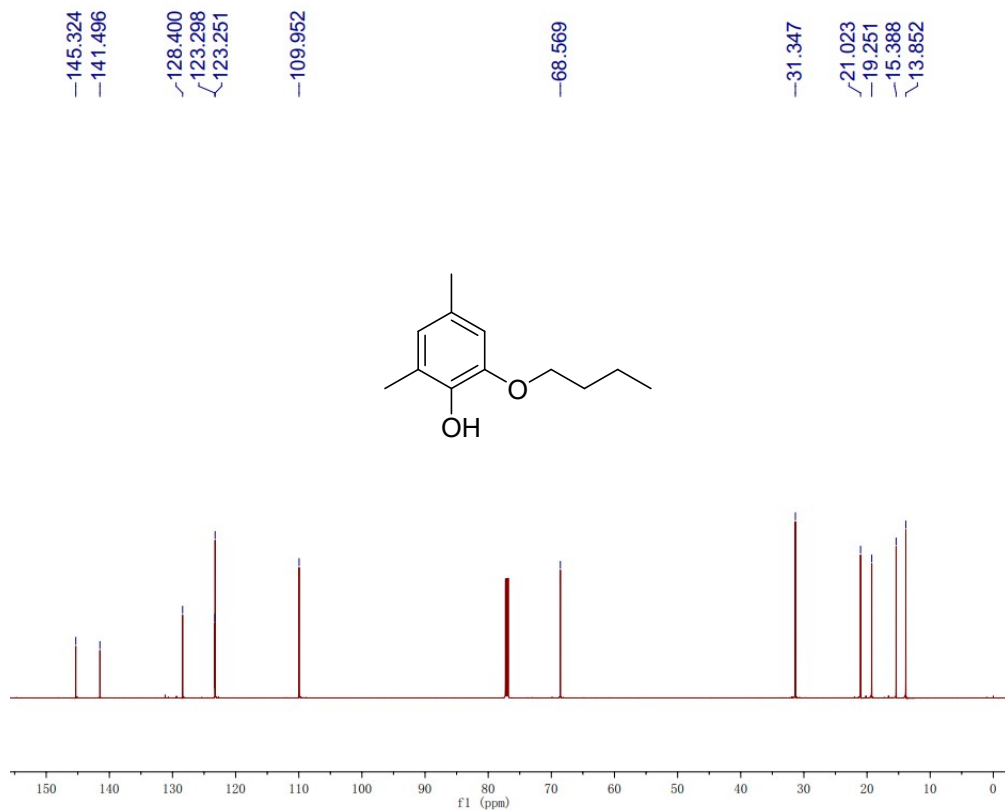

**2-Isobutoxy-4,6-dimethylphenol (1m) [<sup>1</sup>H\_NMR\_400 MHz\_(CDCl<sub>3</sub>: 7.26 ppm)]**

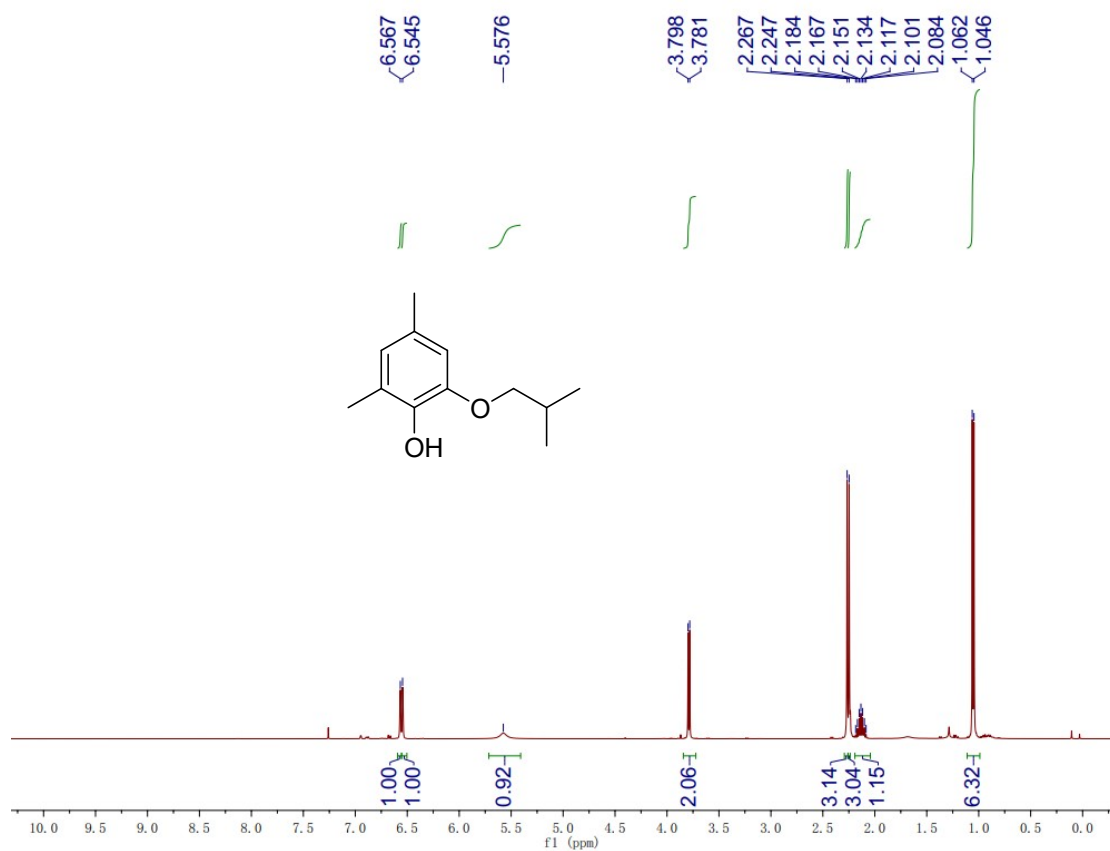

**[<sup>13</sup>C\_NMR\_150 MHz\_(CDCl<sub>3</sub>: 77.00 ppm)]**



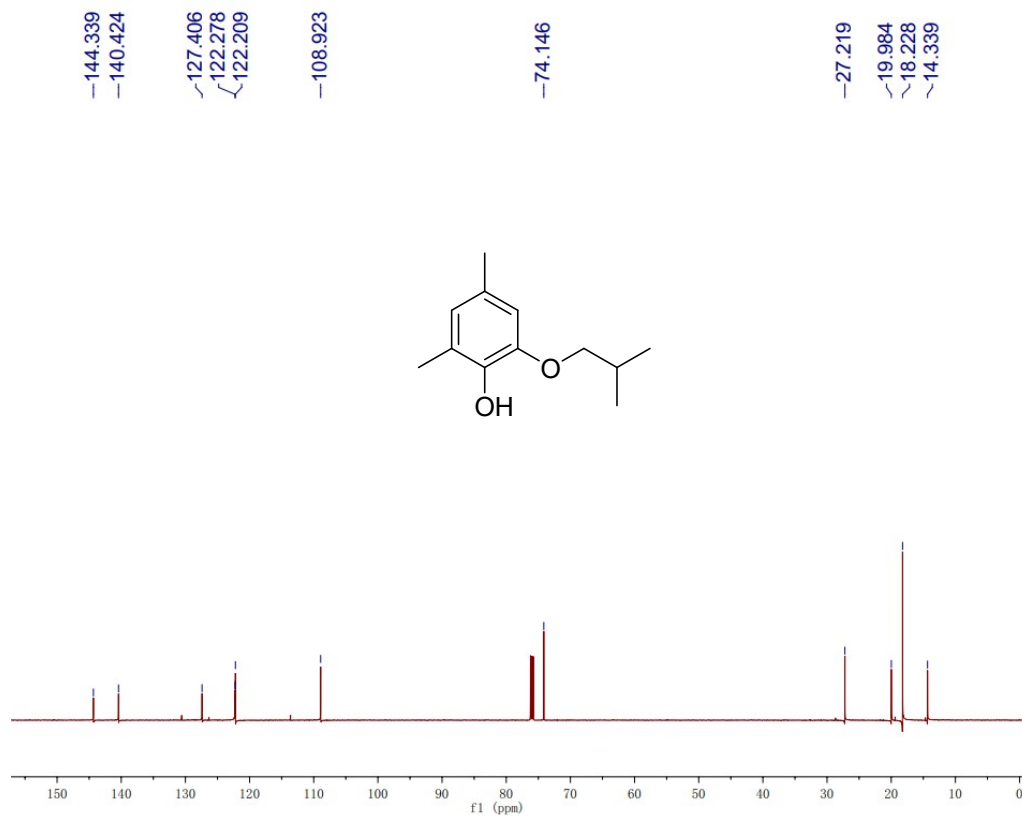

**Ethyl-2,6-dimethoxyphenol (1n)** [<sup>1</sup>H\_NMR\_400 MHz\_(CDCl<sub>3</sub>: 7.26 ppm)]

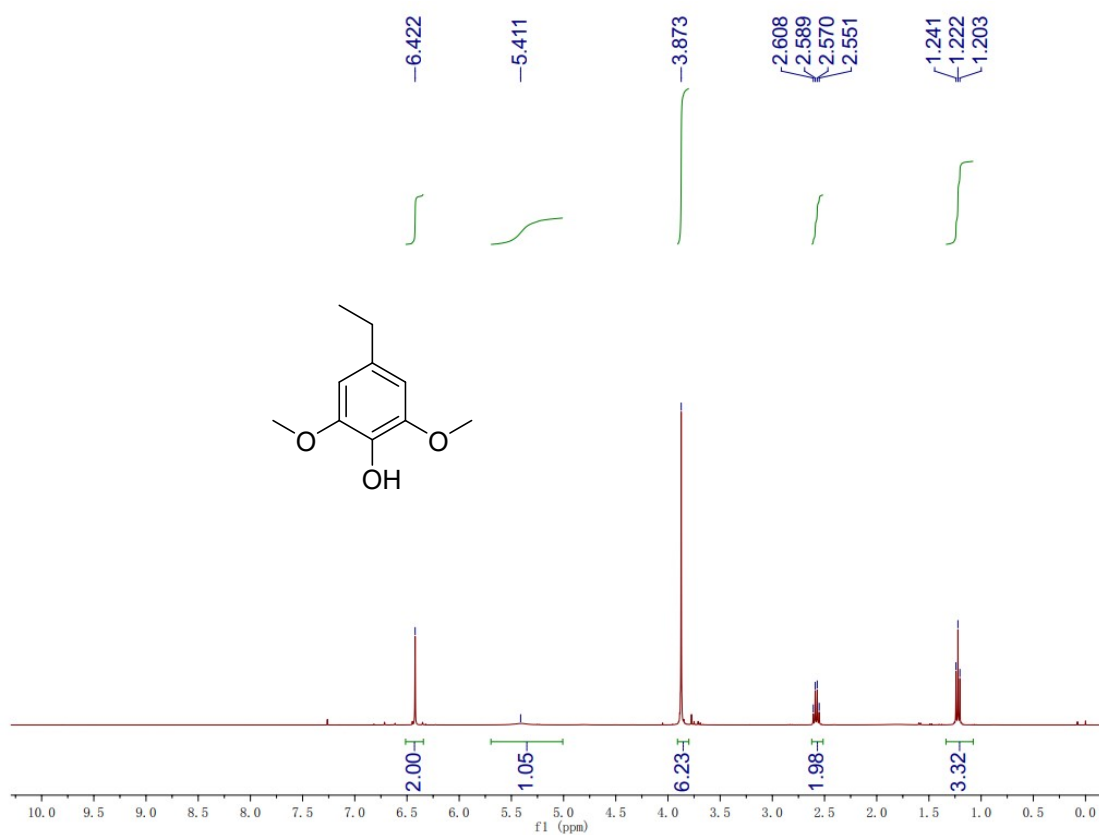

[<sup>13</sup>C\_NMR\_100 MHz\_(CDCl<sub>3</sub>: 77.00 ppm)]

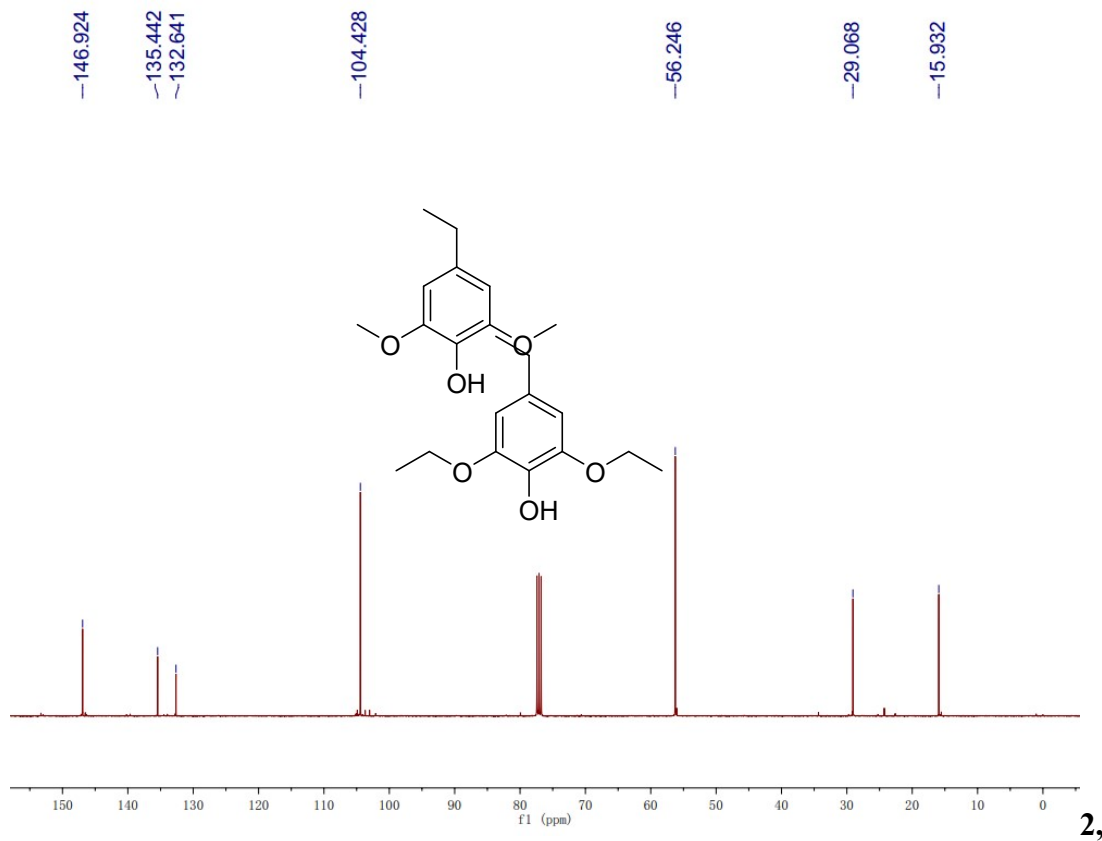

**6-Diethoxy-4-ethylphenol (1o) [<sup>1</sup>H\_NMR\_400 MHz\_(CDCl<sub>3</sub>: 7.26 ppm)]**

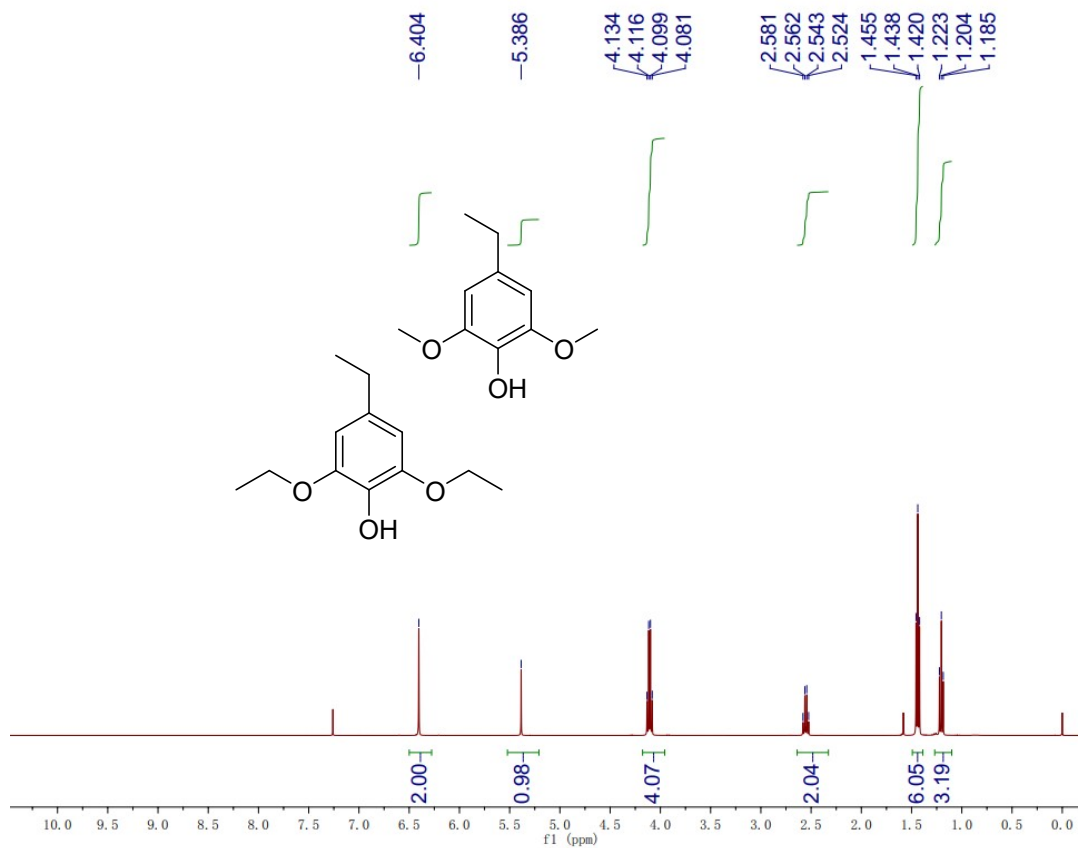

[<sup>13</sup>C\_NMR\_100 MHz\_(CDCl<sub>3</sub>: 77.00 ppm)]

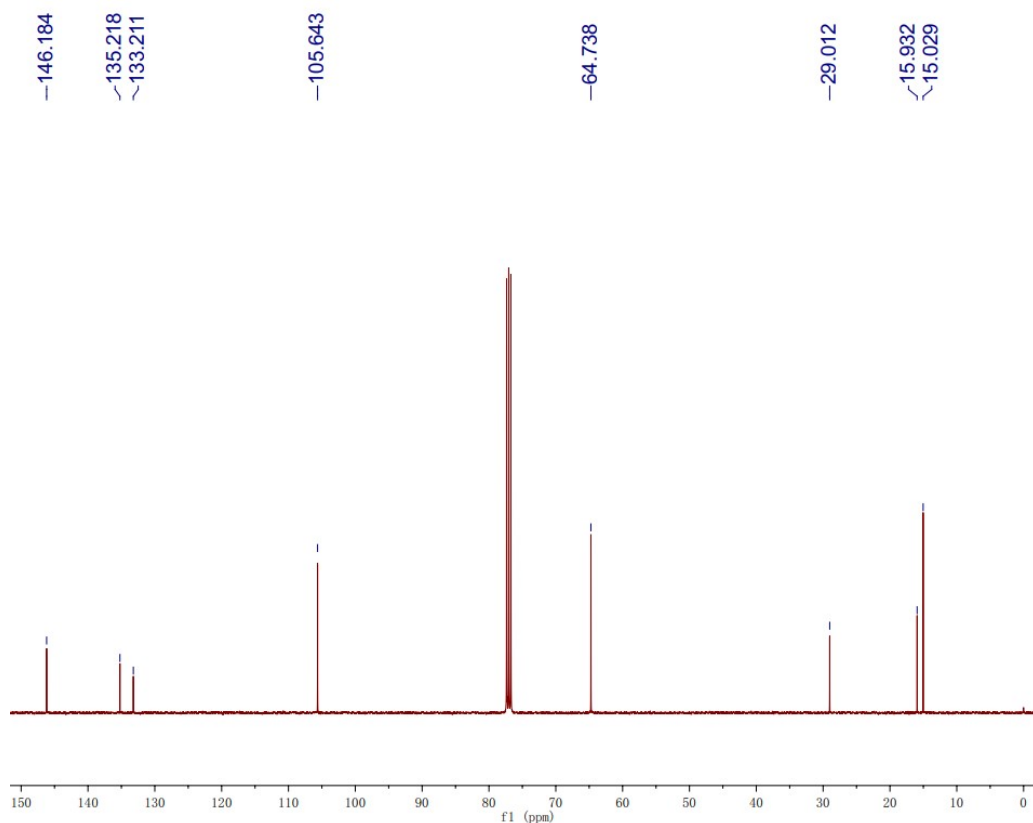

**4-Ethyl-2,6-dipropoxyphenol (1p)** [ $^1\text{H}$ \_NMR\_400 MHz\_( $\text{CDCl}_3$ : 7.26 ppm)]

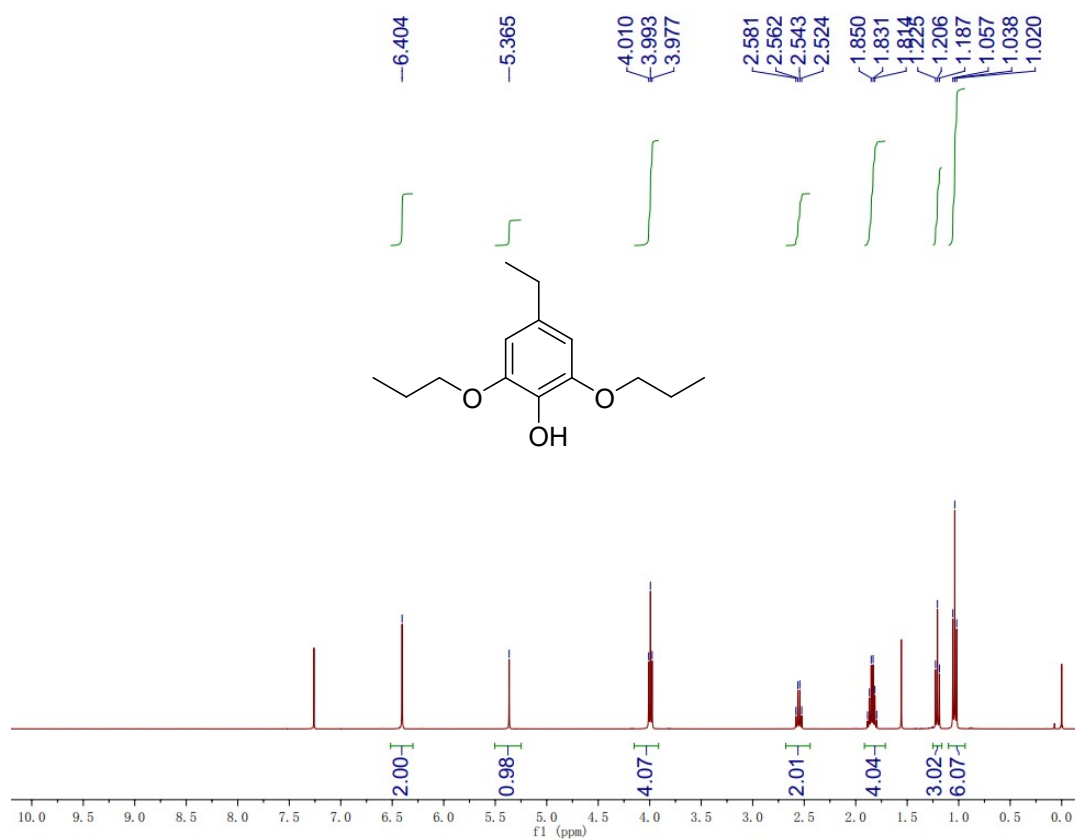

$^{13}\text{C}$ \_NMR\_100 MHz\_( $\text{CDCl}_3$ : 77.00 ppm)]

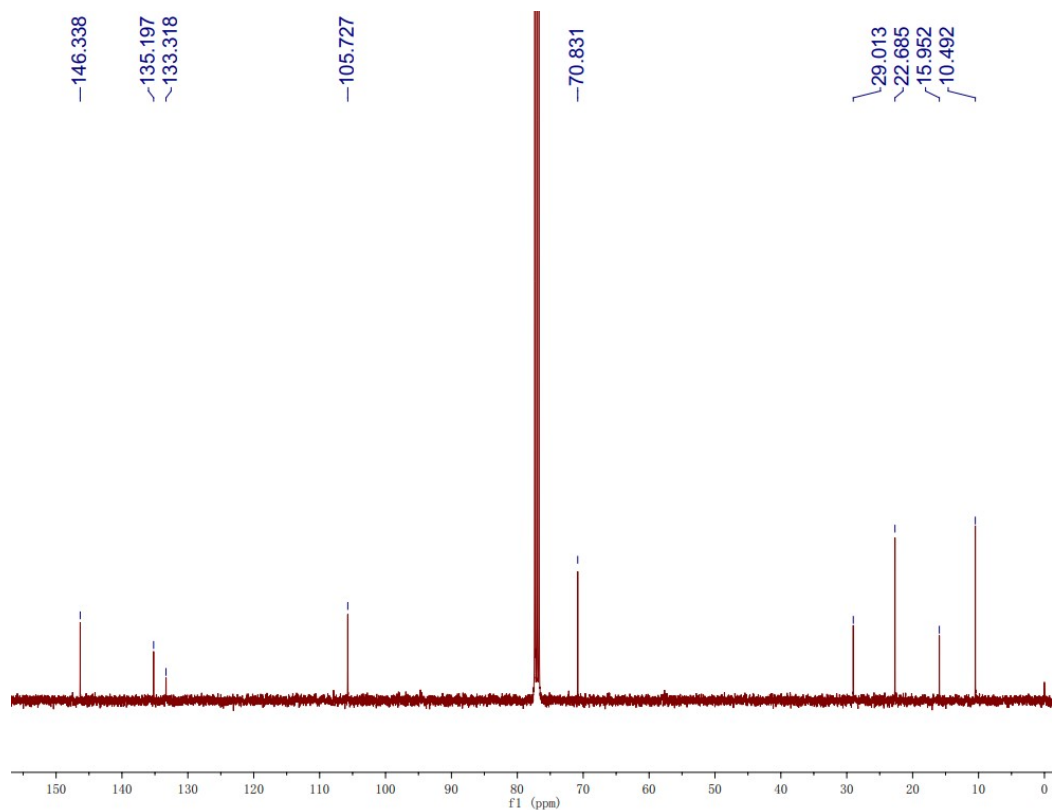

2,6-Dibutoxy-4-ethylphenol (1q) [ $^1\text{H}$ \_NMR\_400 MHz\_( $\text{CDCl}_3$ : 7.26 ppm)]

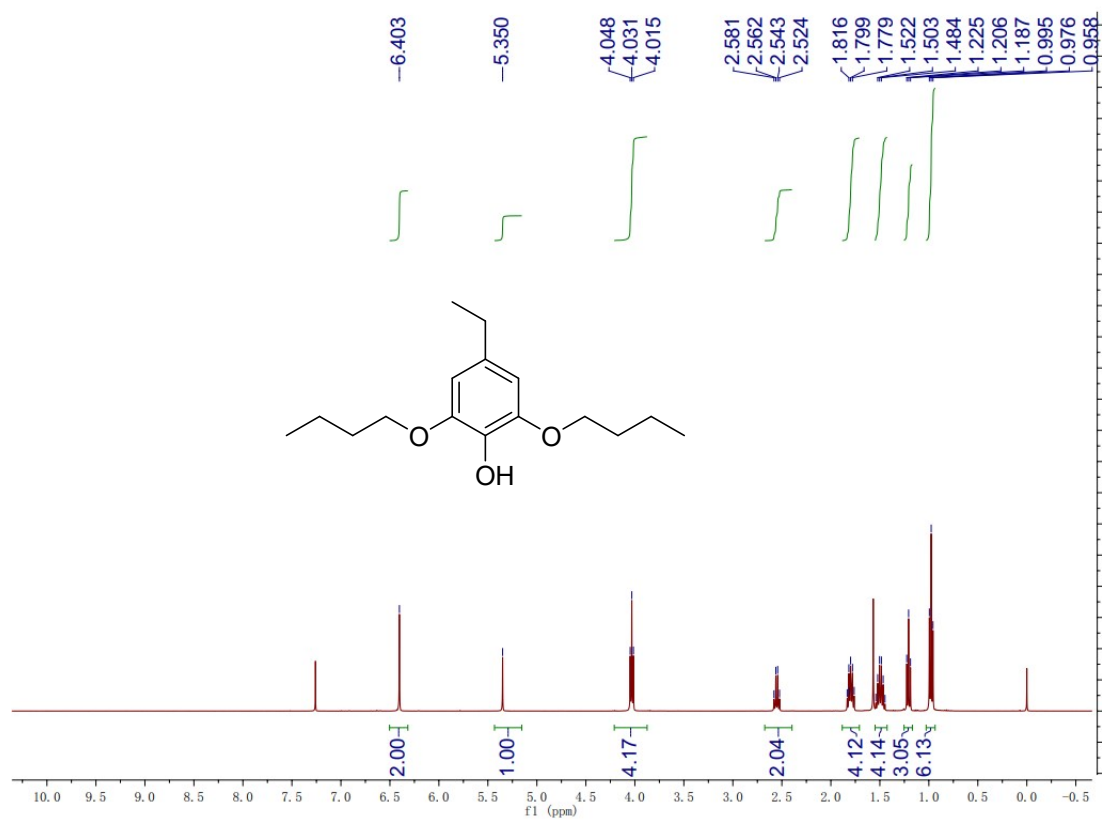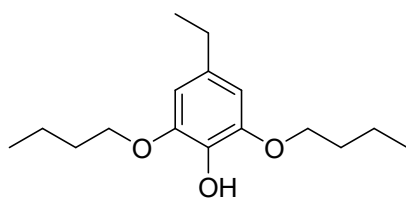

[ $^{13}\text{C}$ \_NMR\_100 MHz\_( $\text{CDCl}_3$ : 77.00 ppm)]

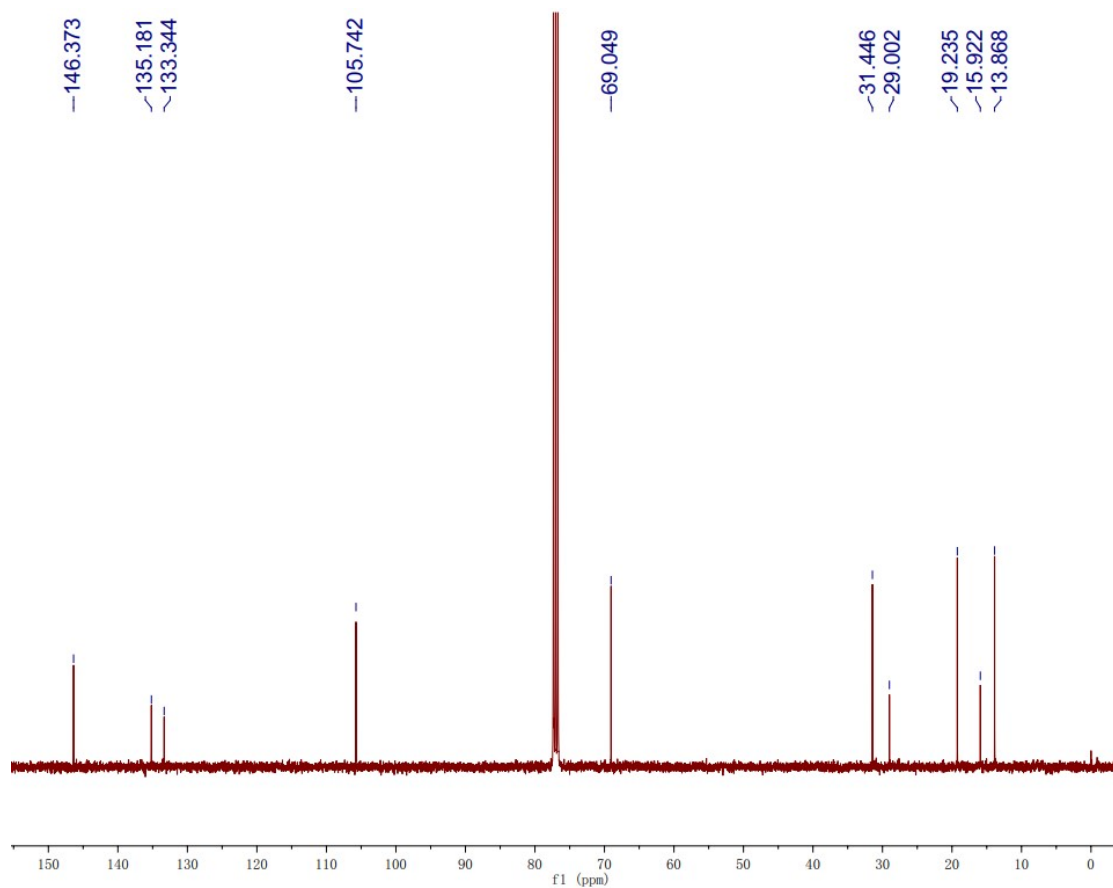

**4-Ethyl-2-methoxy-6-methylphenol (1r)** [ $^1\text{H}$ \_NMR\_400 MHz\_( $\text{CDCl}_3$ : 7.26 ppm)]

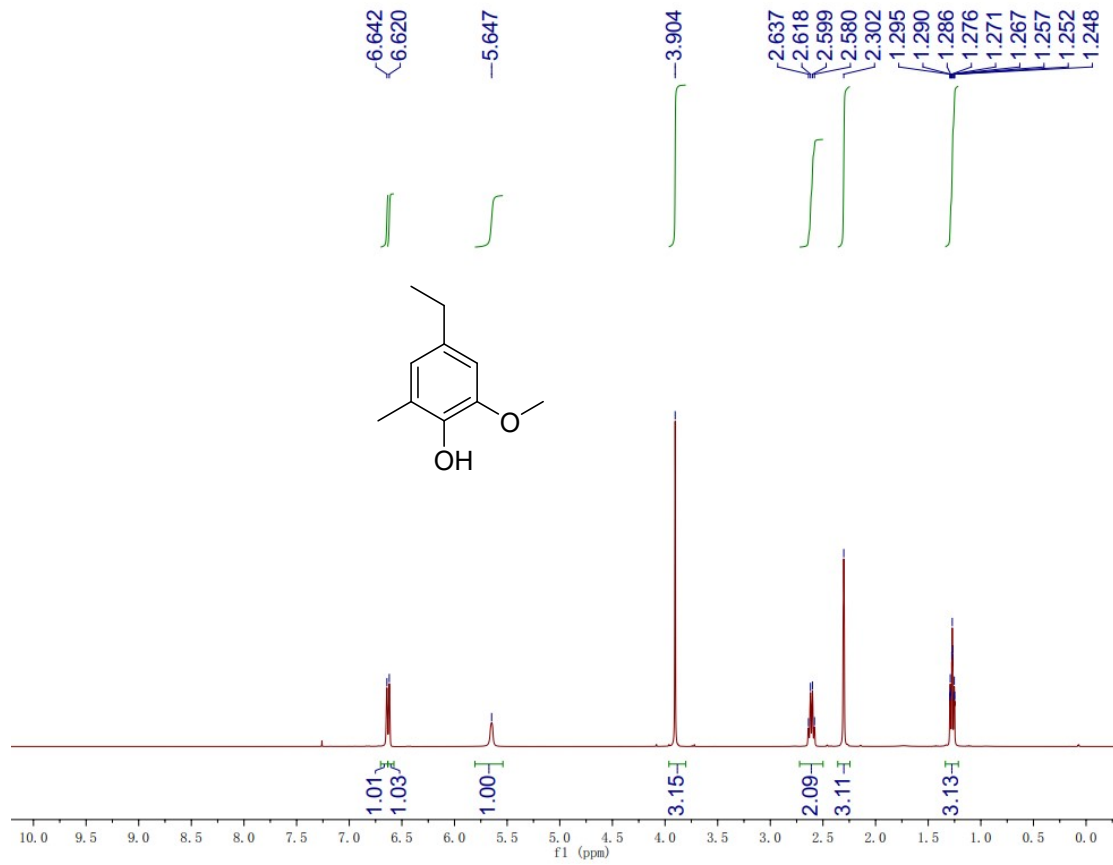

[<sup>13</sup>C\_NMR\_100 MHz\_(CDCl<sub>3</sub>: 77.00 ppm)]

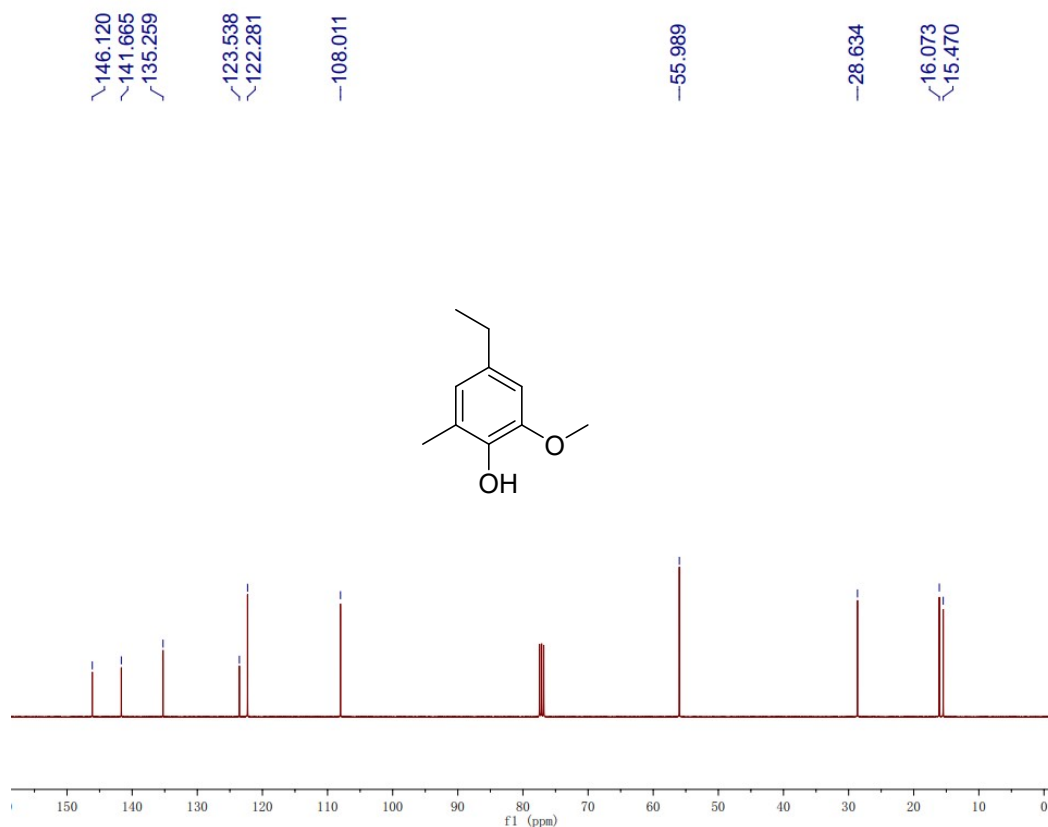

**2-Ethoxy-4-ethyl-6-methylphenol (1s)** [<sup>1</sup>H\_NMR\_400 MHz\_(CDCl<sub>3</sub>: 7.26 ppm)]

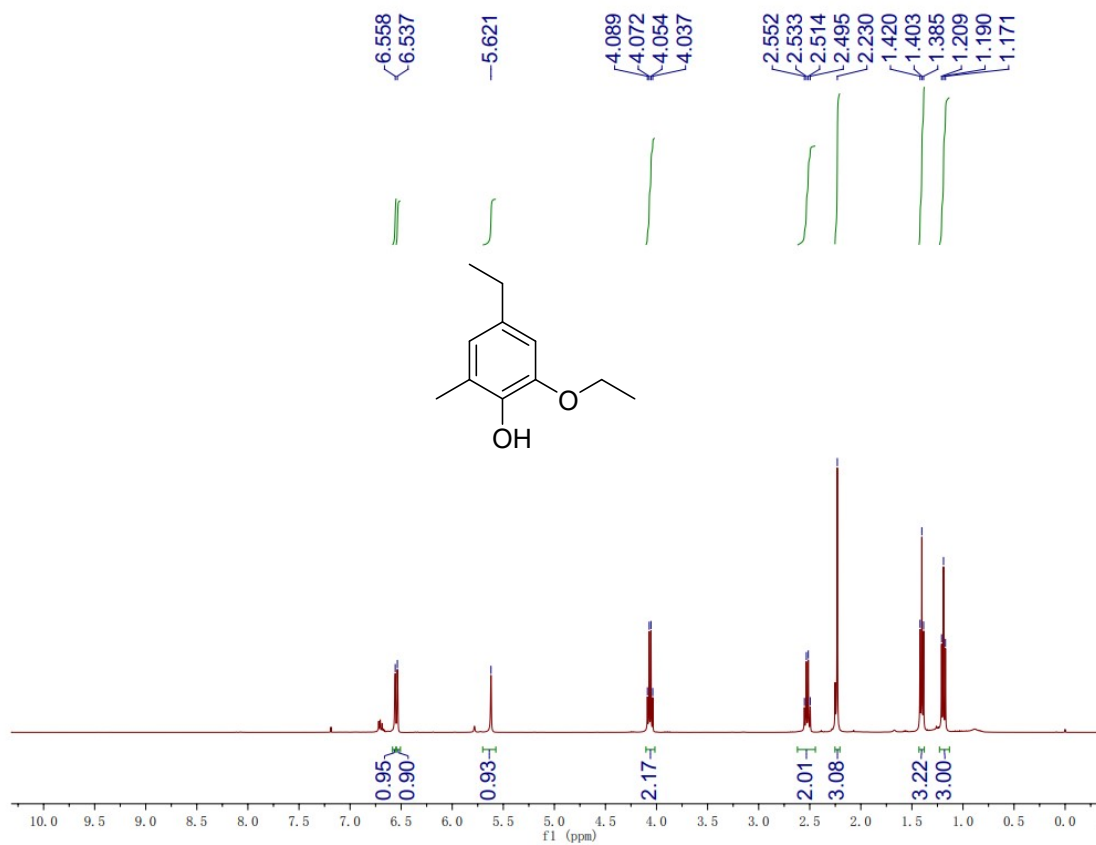

[<sup>13</sup>C\_NMR\_100 MHz\_(CDCl<sub>3</sub>: 77.00 ppm)]

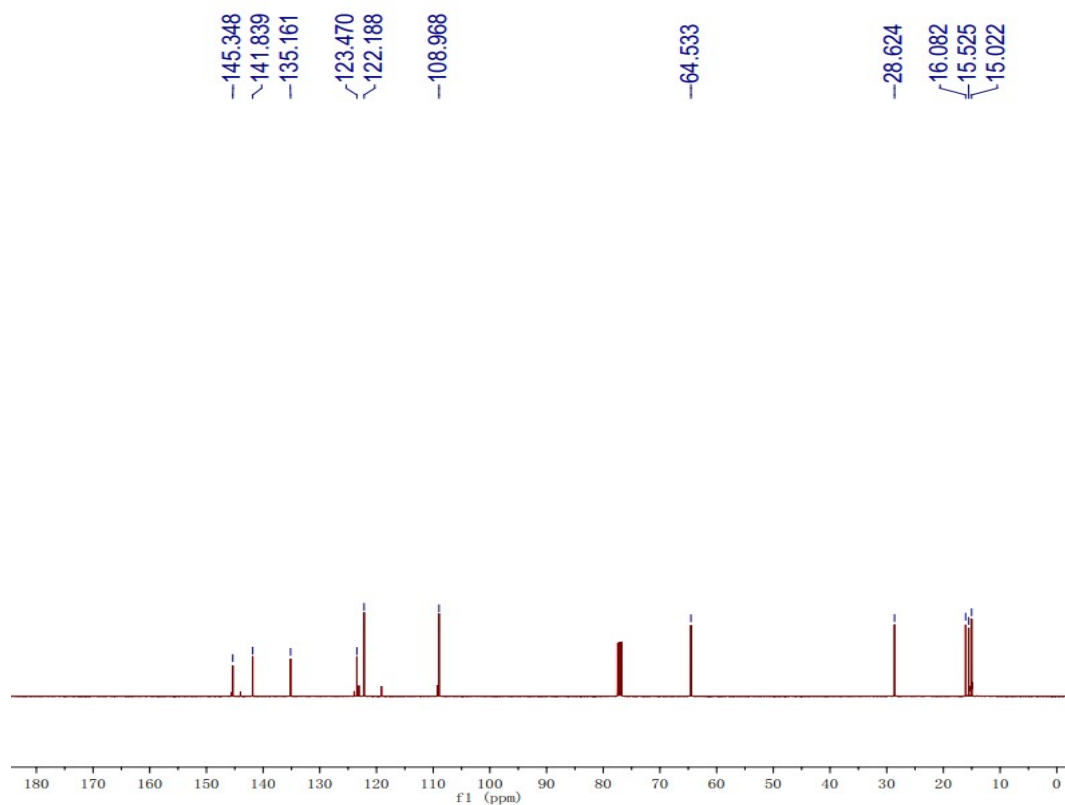

**2,6-Dimethoxy-4-propylphenol (1t)** [<sup>1</sup>H\_NMR\_400 MHz\_(CDCl<sub>3</sub>: 7.26 ppm)]

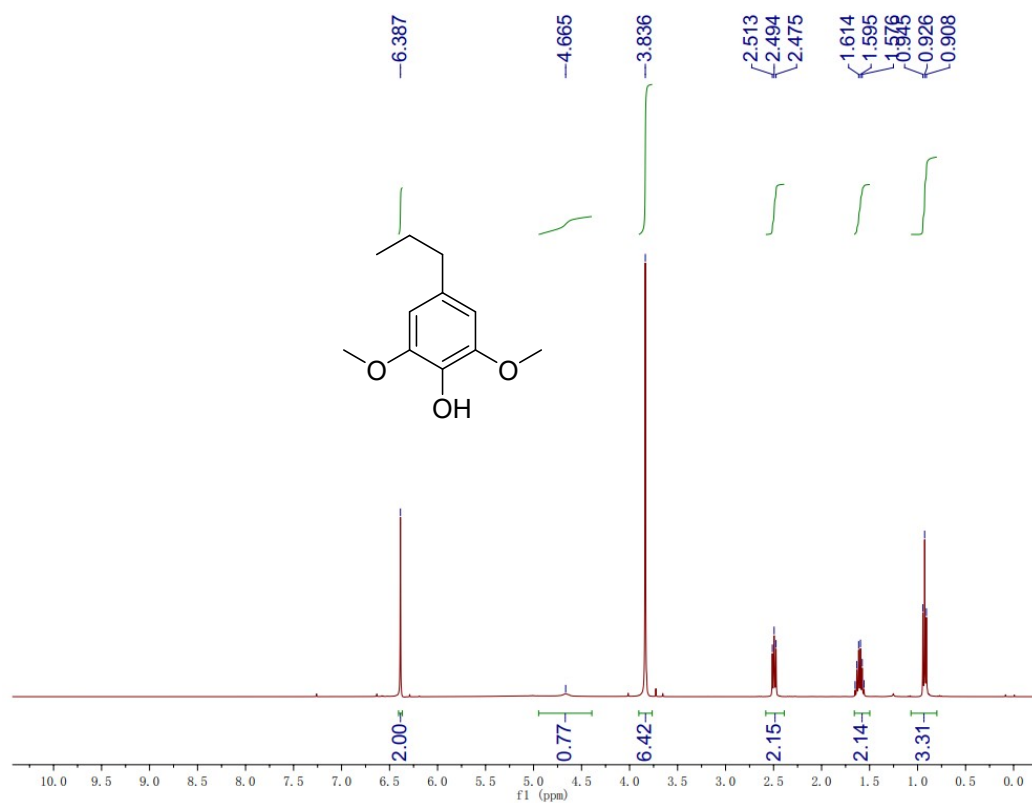

[<sup>13</sup>C\_NMR\_100 MHz\_(CDCl<sub>3</sub>: 77.00 ppm)]

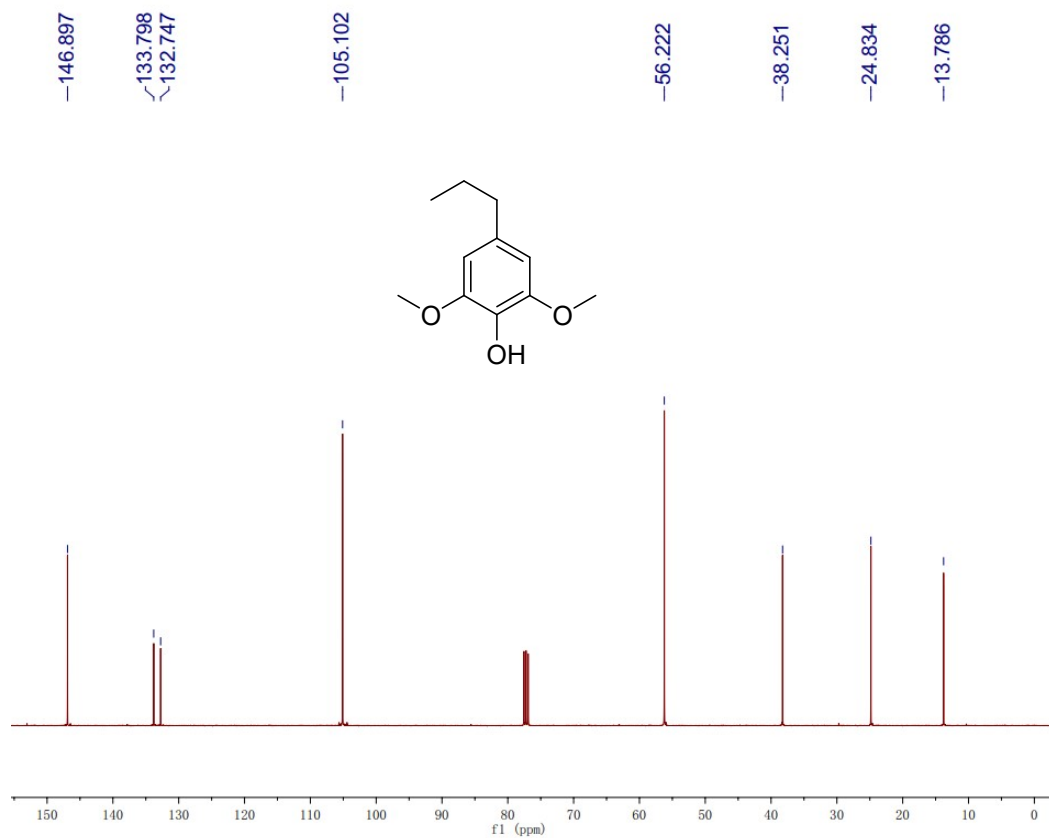

**4-Butyl-2,6-dimethoxyphenol (1u)** [ $^1\text{H}$ \_NMR\_400 MHz\_( $\text{CDCl}_3$ : 7.26 ppm)]

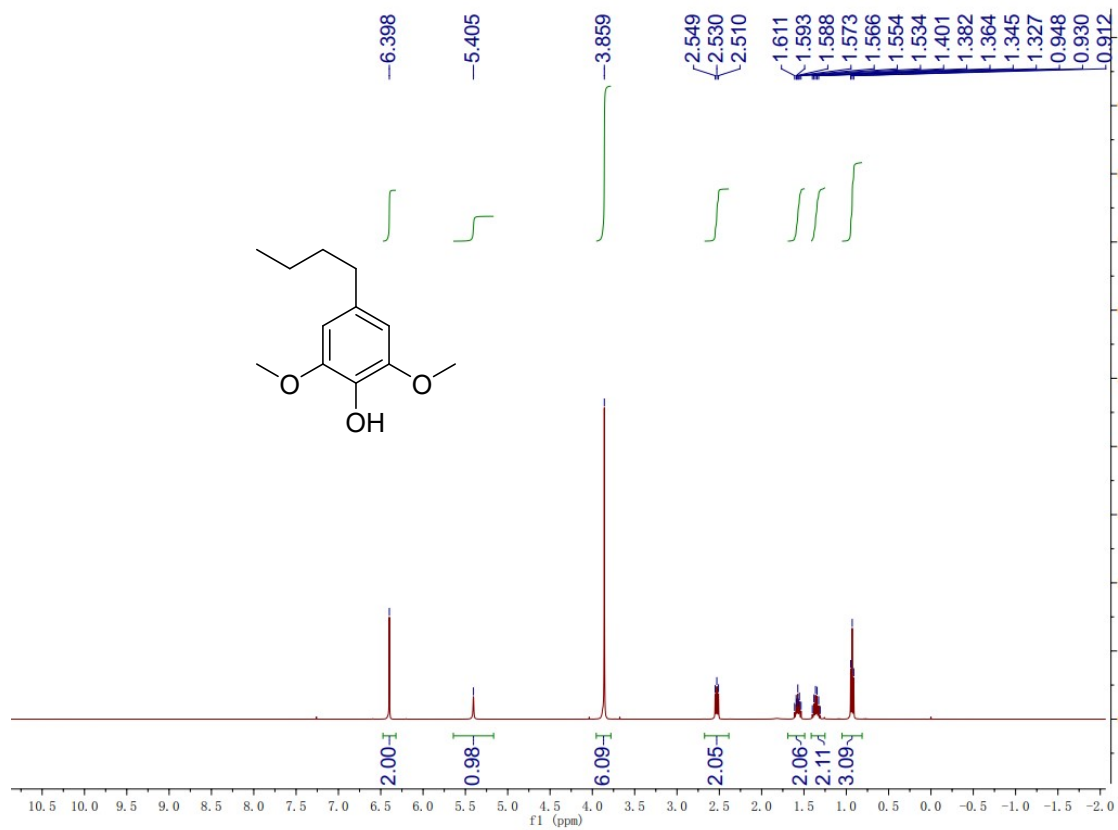

[ $^{13}\text{C}$ \_NMR\_100 MHz\_( $\text{CDCl}_3$ : 77.00 ppm)]



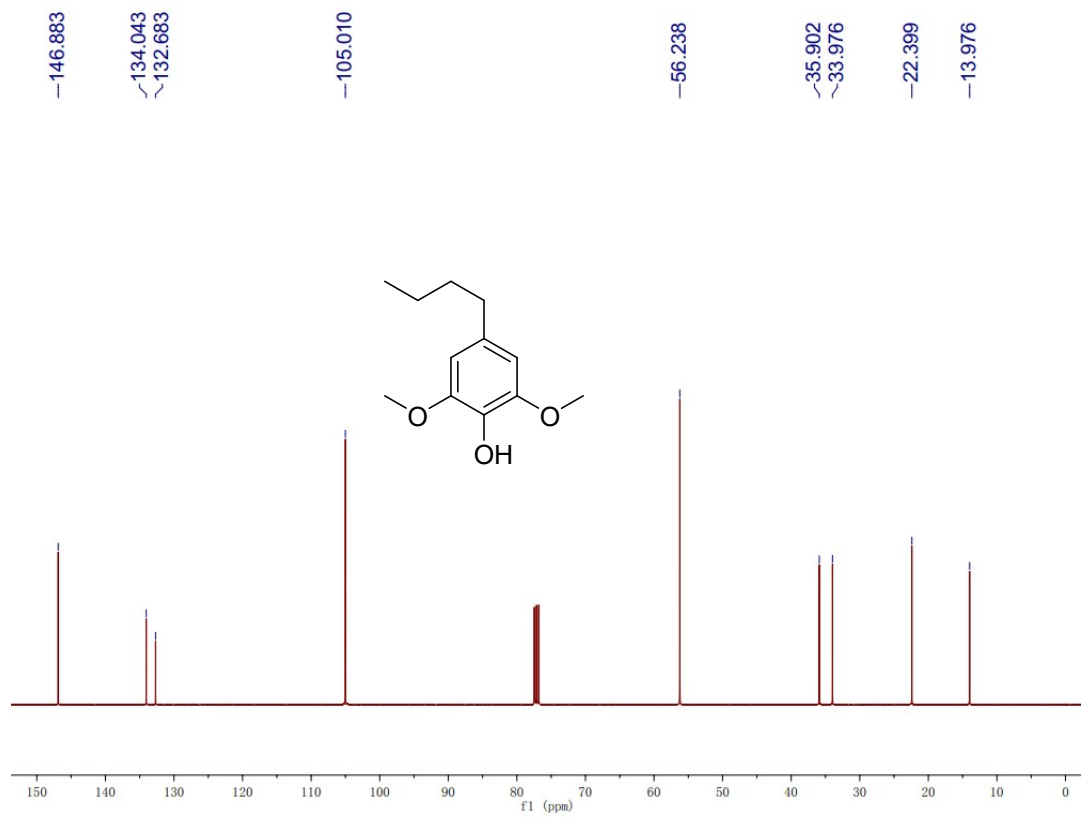

**2,6-Dimethoxy-4-pentylphenol (1v)** [ $^1\text{H}$ \_NMR\_400 MHz\_( $\text{CDCl}_3$ : 7.26 ppm)]

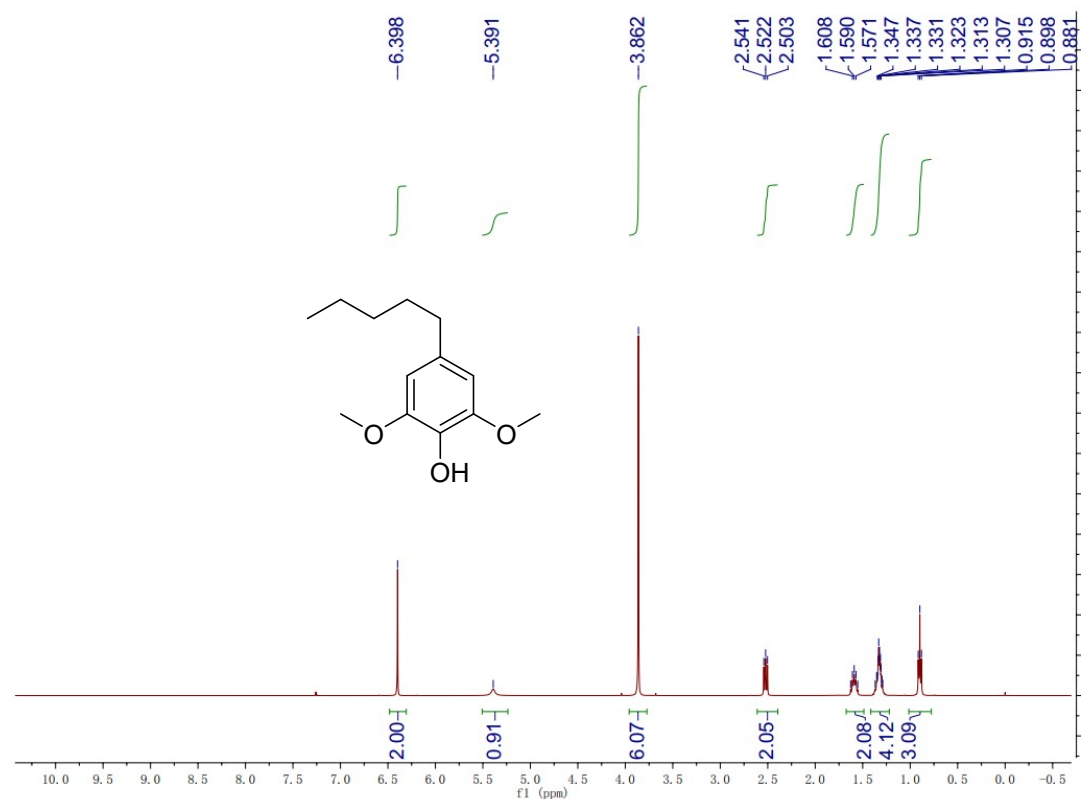

[ $^{13}\text{C}$ \_NMR\_100 MHz\_( $\text{CDCl}_3$ : 77.00 ppm)]

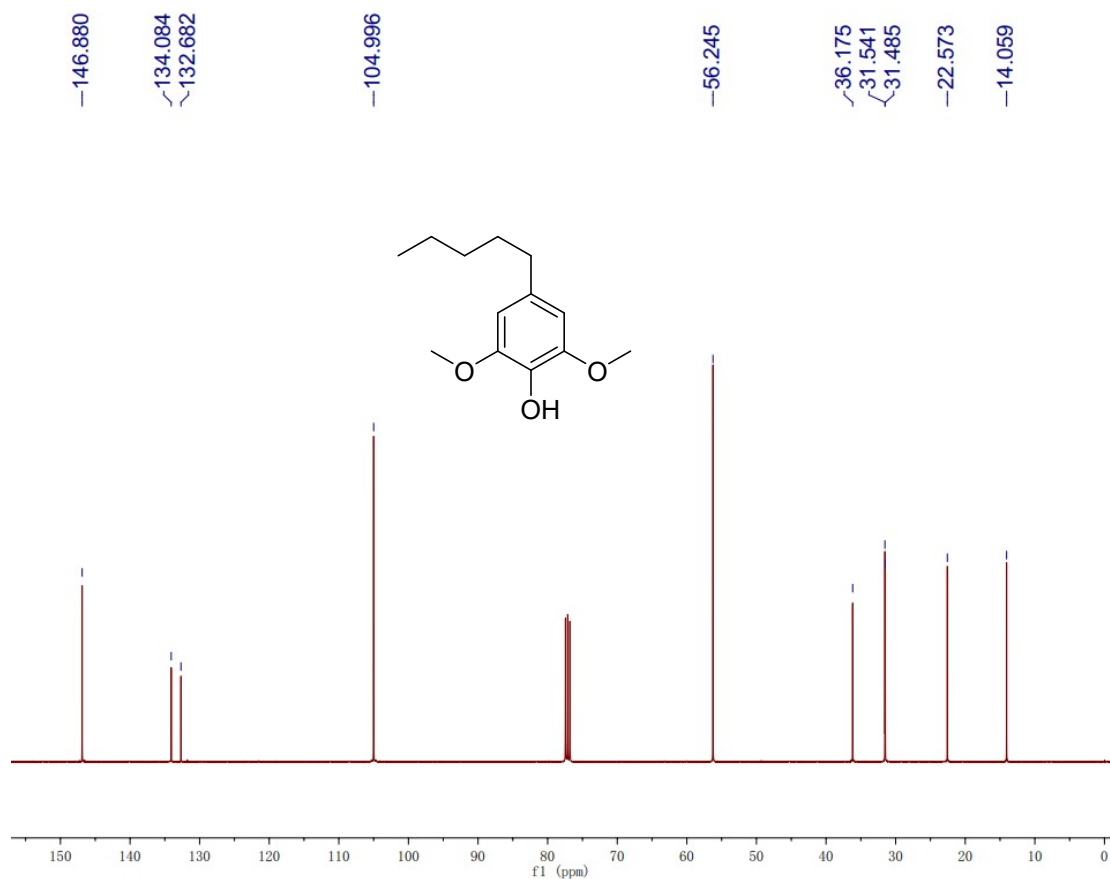

4-Benzyl-2,6-dimethoxyphenol (1w) [<sup>1</sup>H\_NMR\_400 MHz\_(CDCl<sub>3</sub>: 7.26 ppm)]

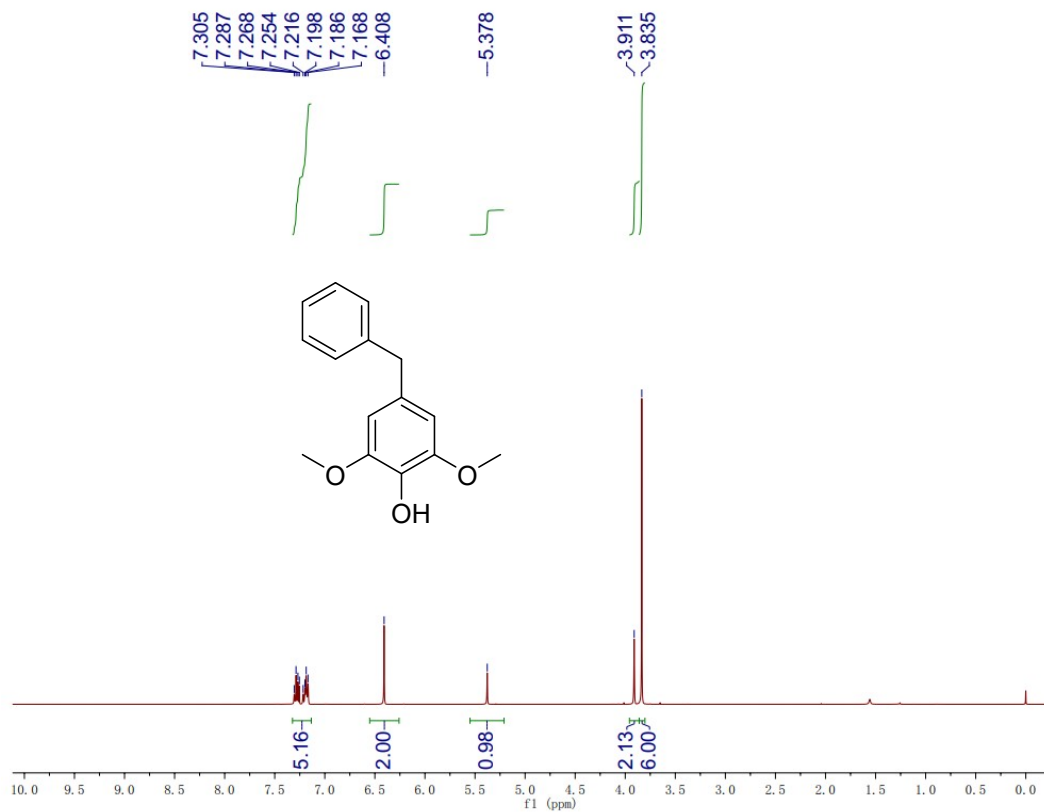

[<sup>13</sup>C\_NMR\_100 MHz\_(CDCl<sub>3</sub>: 77.00 ppm)]

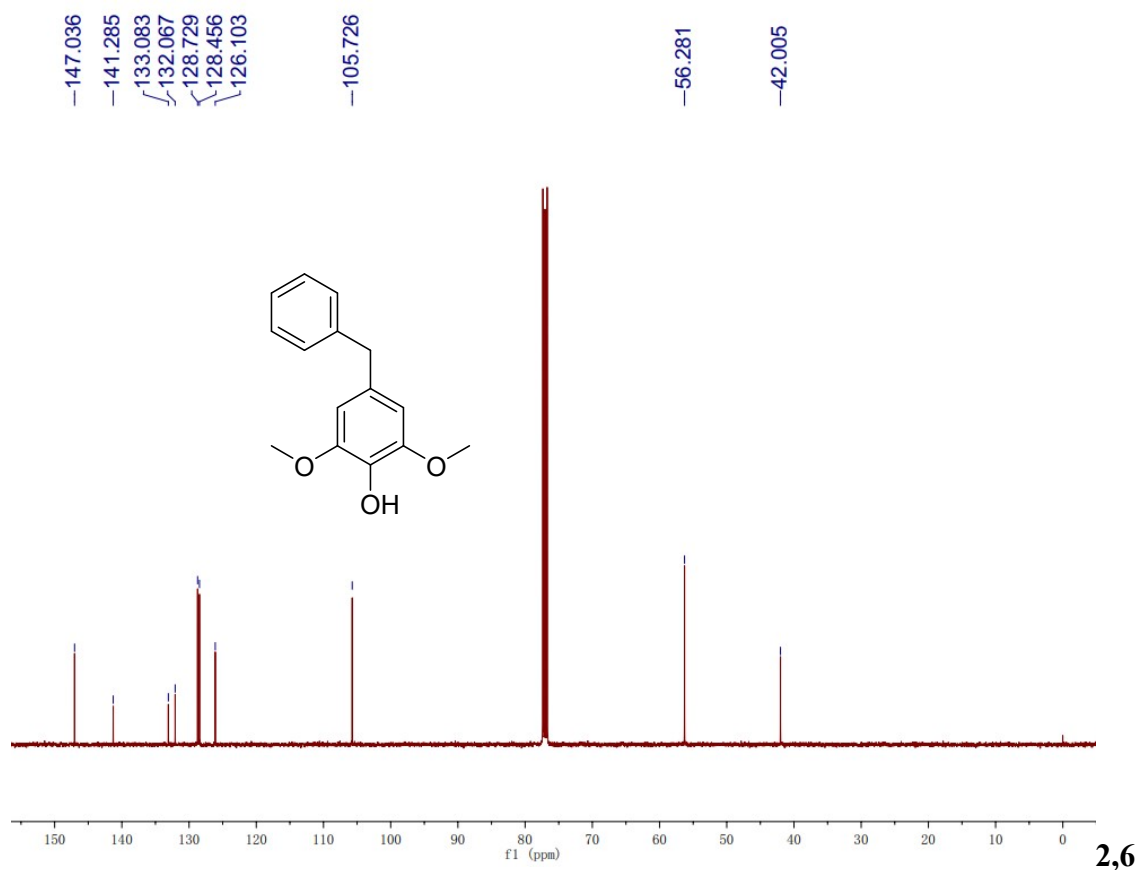

**-Dimethoxy-4-(4-methylbenzyl)phenol (1x)** [ $^1\text{H}$ \_NMR\_400 MHz\_( $\text{CDCl}_3$ : 7.26 ppm)]

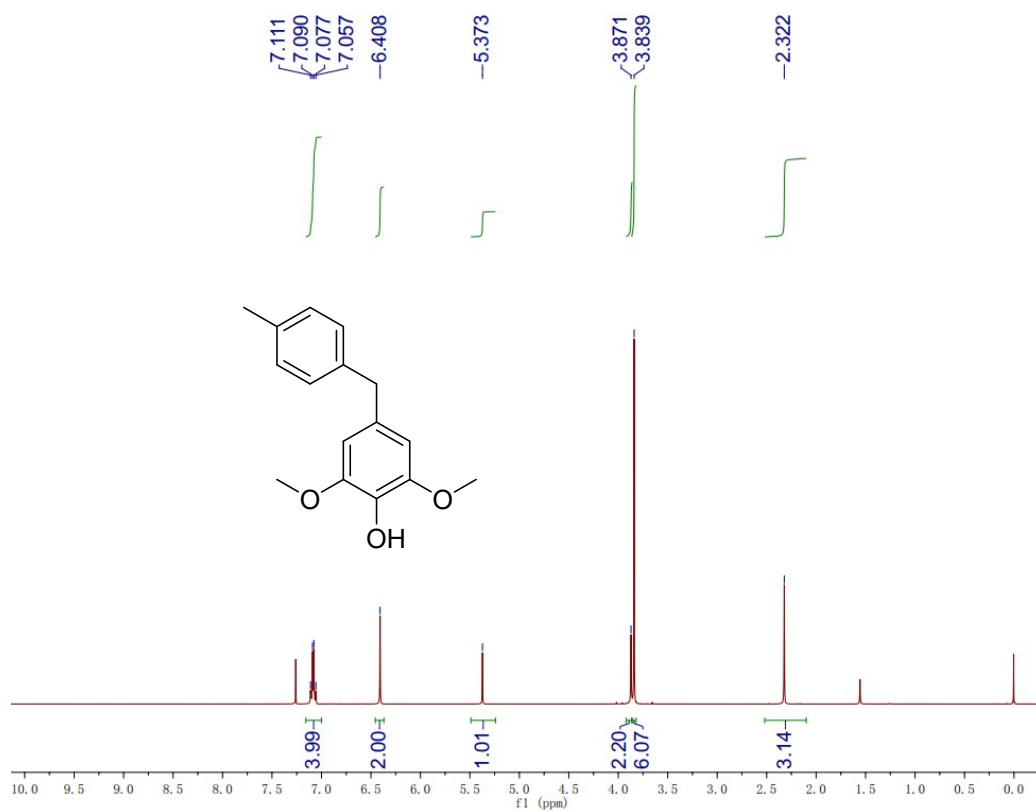

[<sup>13</sup>C\_NMR\_100 MHz\_(CDCl<sub>3</sub>: 77.00 ppm)]

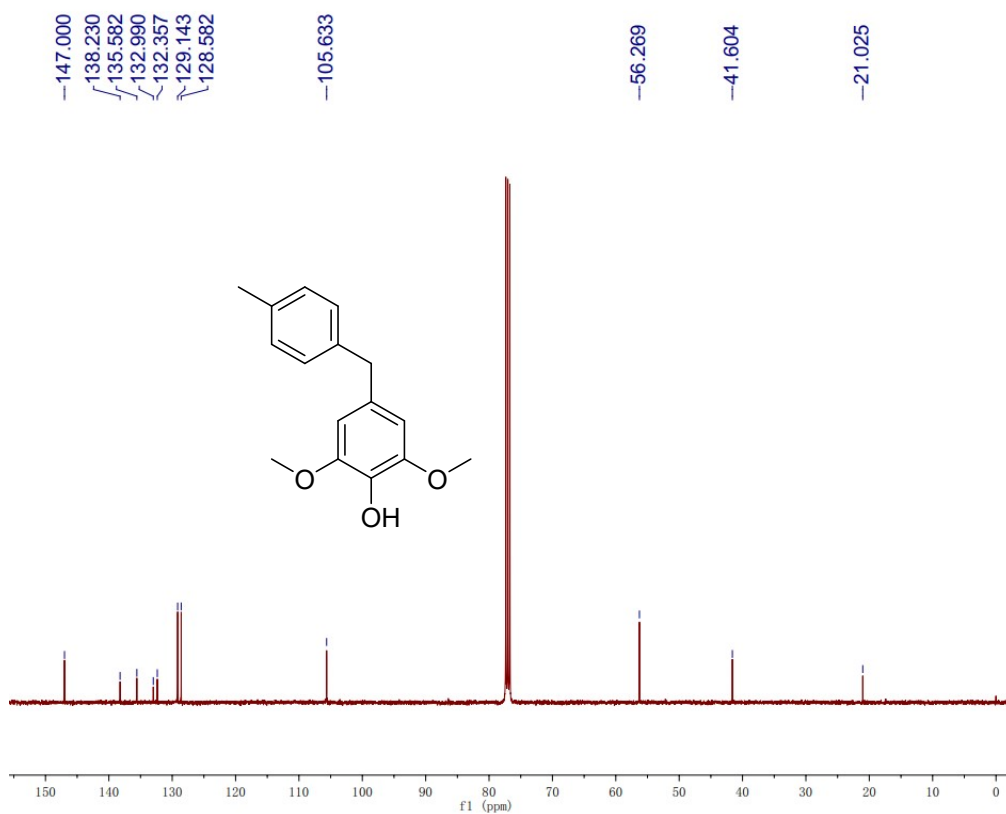

4-(4-Chlorobenzyl)-2,6-dimethoxyphenol (1y) [<sup>1</sup>H\_NMR\_400 MHz\_(DMSO-d<sub>6</sub>: 2.50 ppm)]

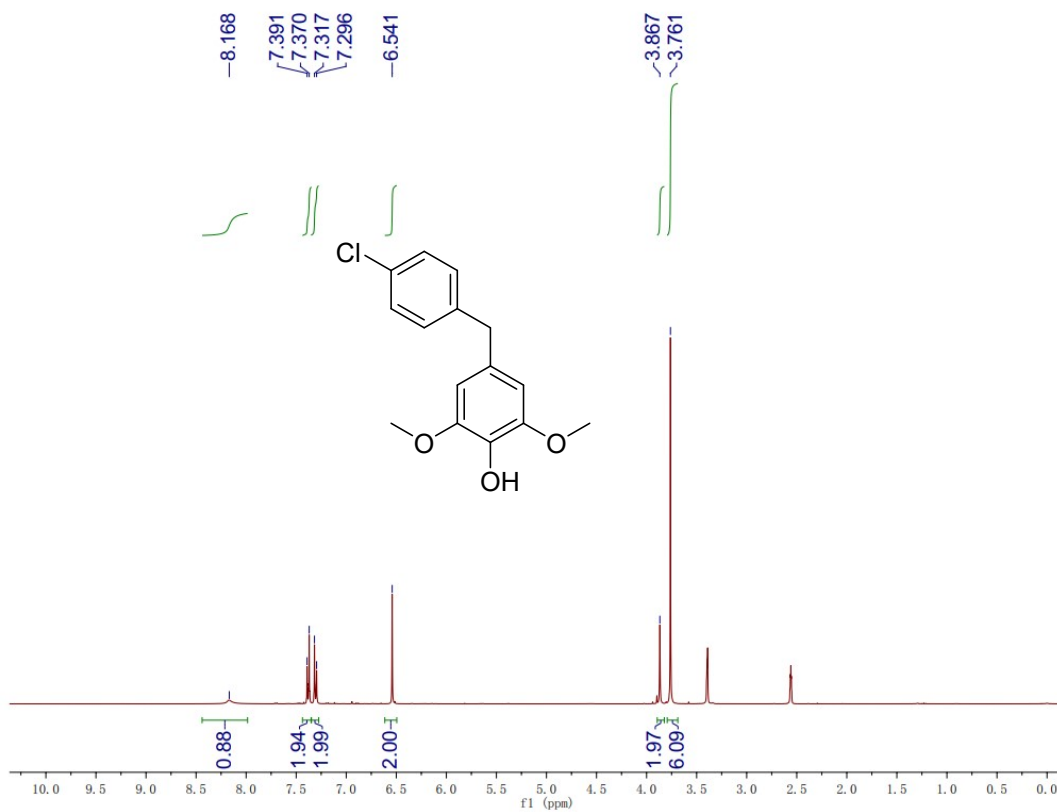

[<sup>13</sup>C\_NMR\_100 MHz\_( DMSO-d<sub>6</sub>: 39.52 ppm)]

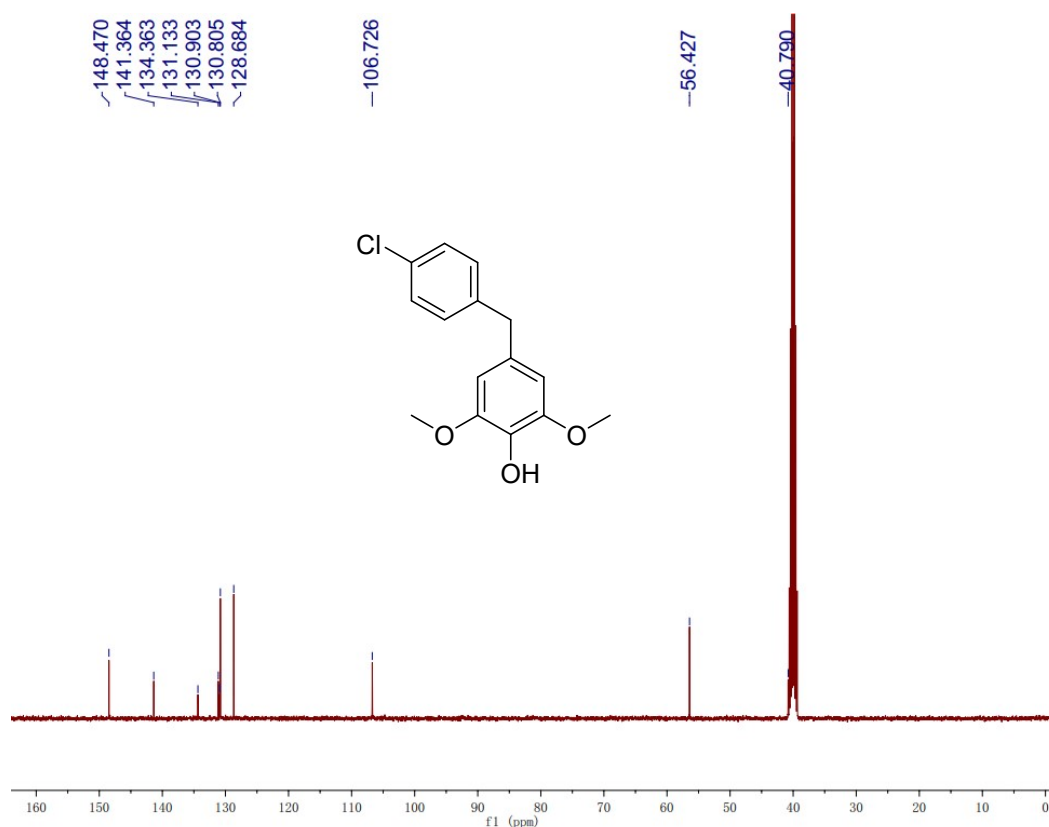

4-Isopropyl-2,6-dimethoxyphenol (1z) [<sup>1</sup>H\_NMR\_400 MHz\_(CDCl<sub>3</sub>: 7.26 ppm)]

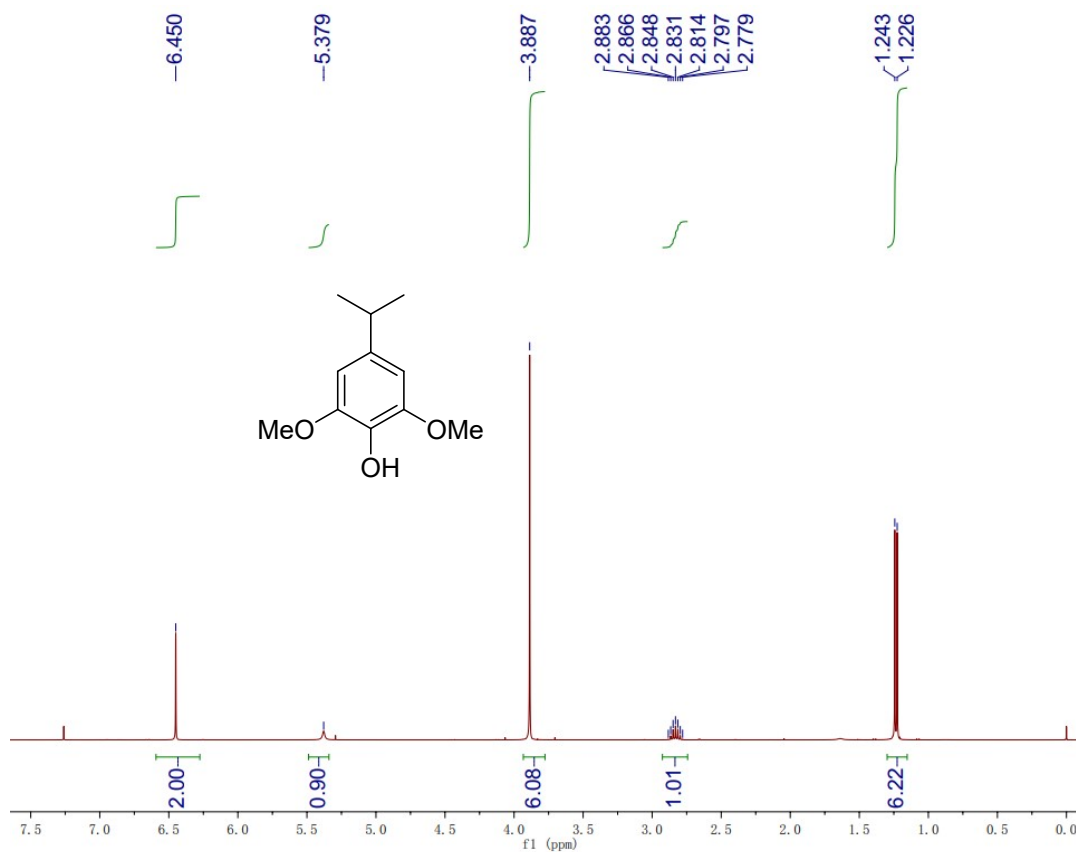

[<sup>13</sup>C\_NMR\_150 MHz\_(CDCl<sub>3</sub>: 77.00 ppm)]

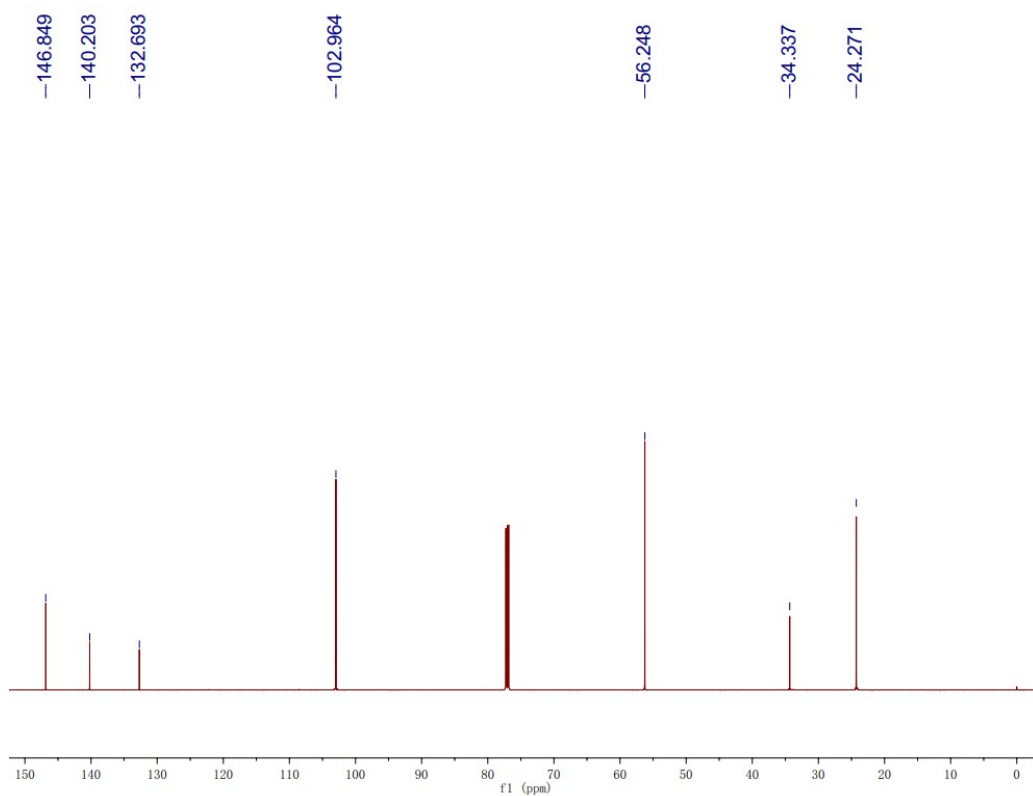

**2,6-Dimethoxy-4-(methoxymethyl)phenol (2a)** [<sup>1</sup>H\_NMR\_400 MHz\_(CDCl<sub>3</sub>: 7.26 ppm)]

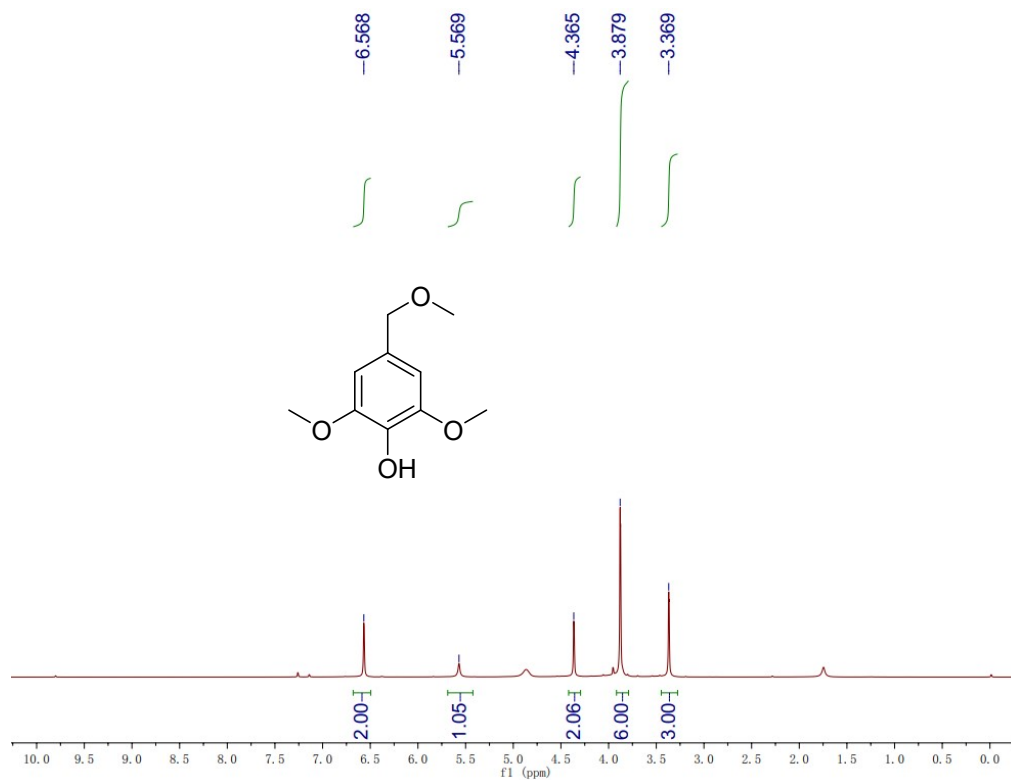

[<sup>13</sup>C\_NMR\_150 MHz\_(CDCl<sub>3</sub>: 77.00 ppm)]

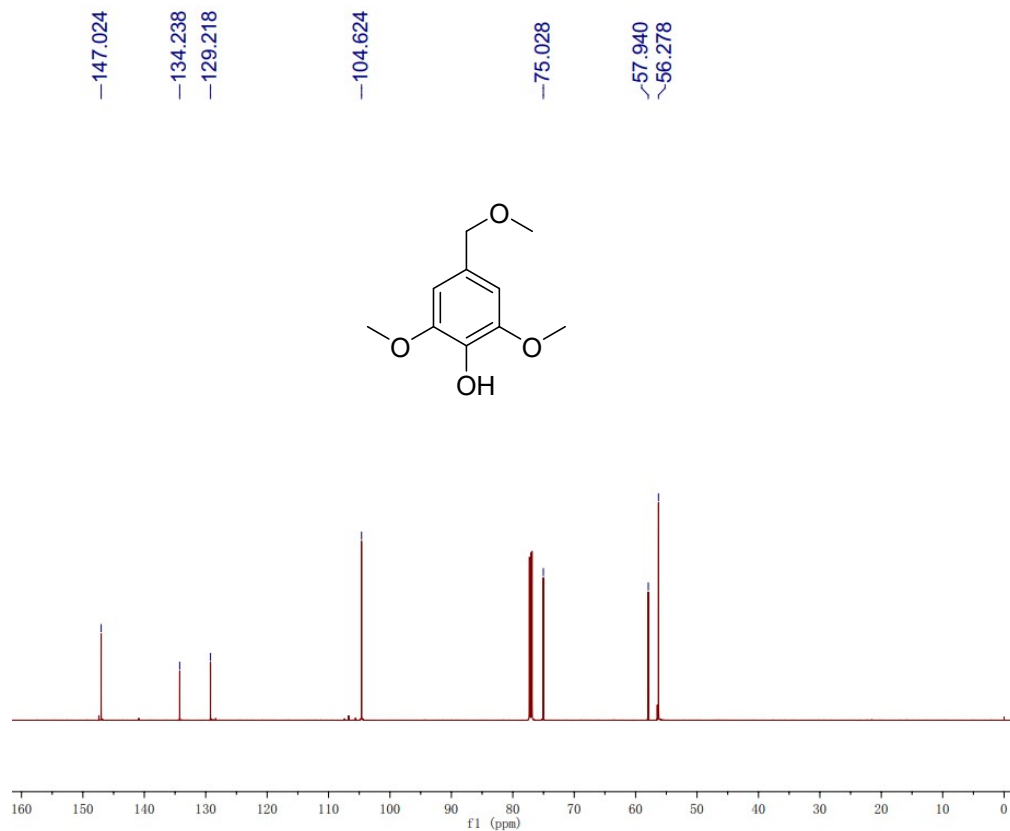

**2,6-Diethoxy-4-(methoxymethyl)phenol (2b)** [<sup>1</sup>H\_NMR\_400 MHz\_(CDCl<sub>3</sub>: 7.26 ppm)]

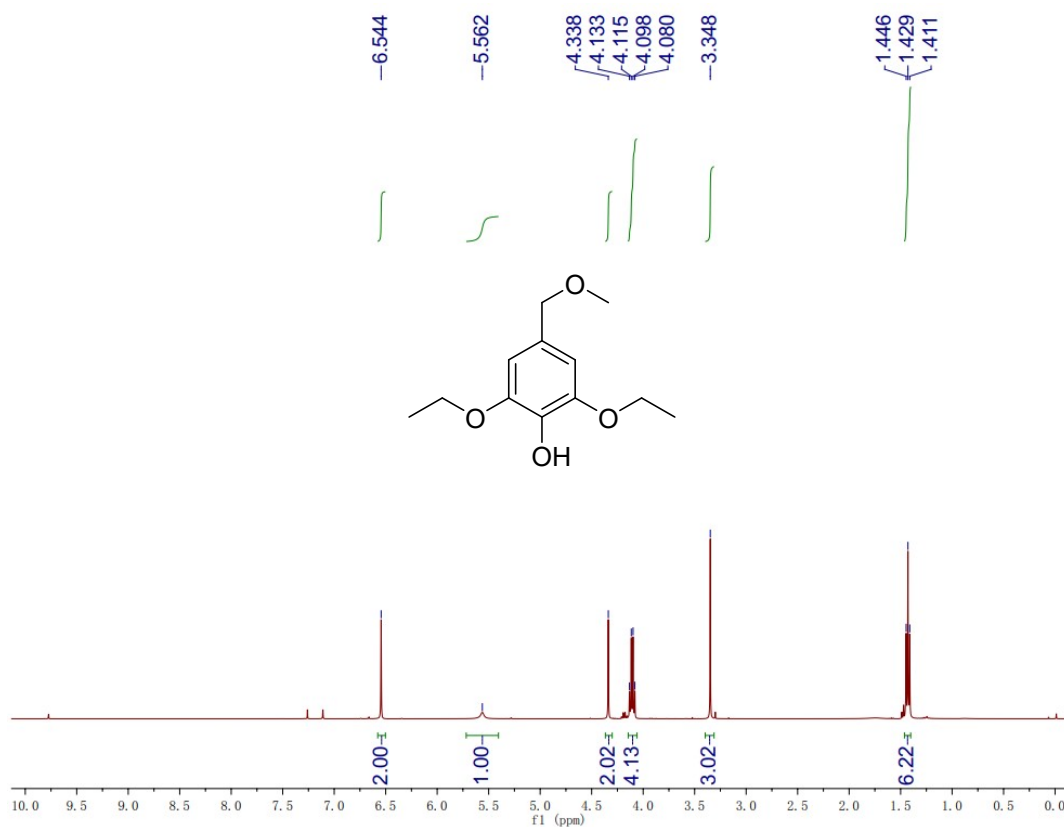

[<sup>13</sup>C\_NMR\_150 MHz\_(CDCl<sub>3</sub>: 77.00 ppm)]

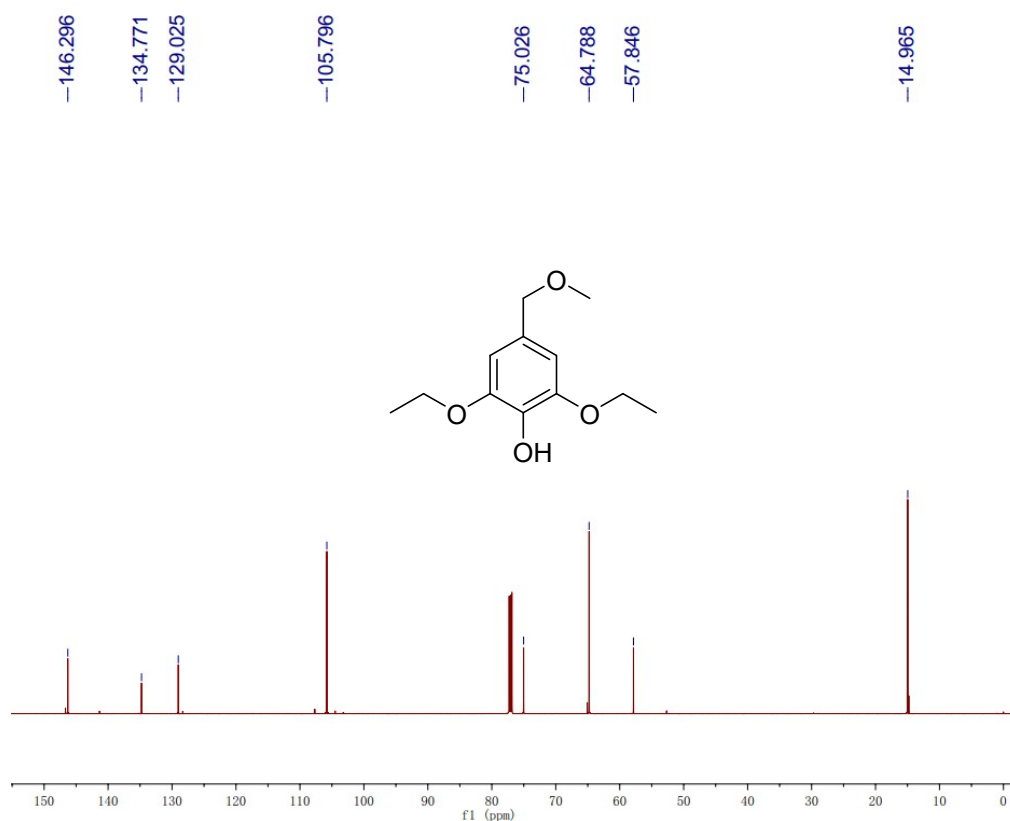

4-(Methoxymethyl)-2,6-dipropoxyphenol (2c) [<sup>1</sup>H\_NMR\_400 MHz\_(CDCl<sub>3</sub>: 7.26 ppm)]

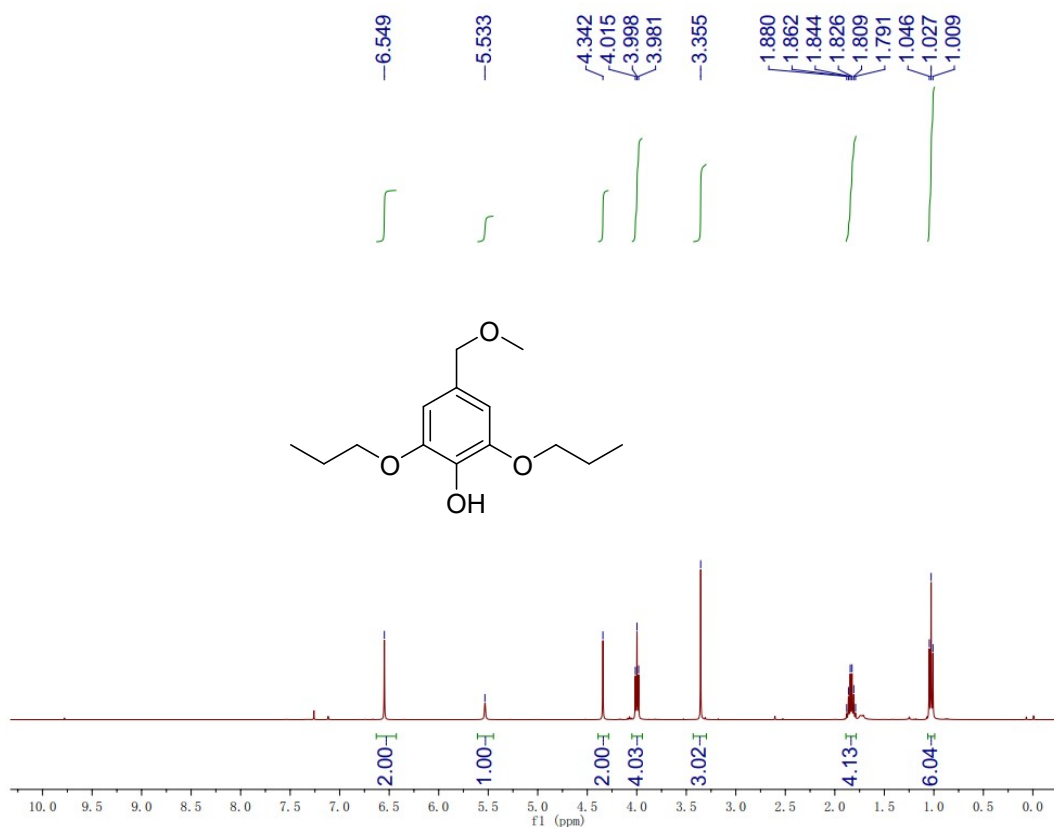



[<sup>13</sup>C\_NMR\_150 MHz\_(CDCl<sub>3</sub>: 77.00 ppm)]

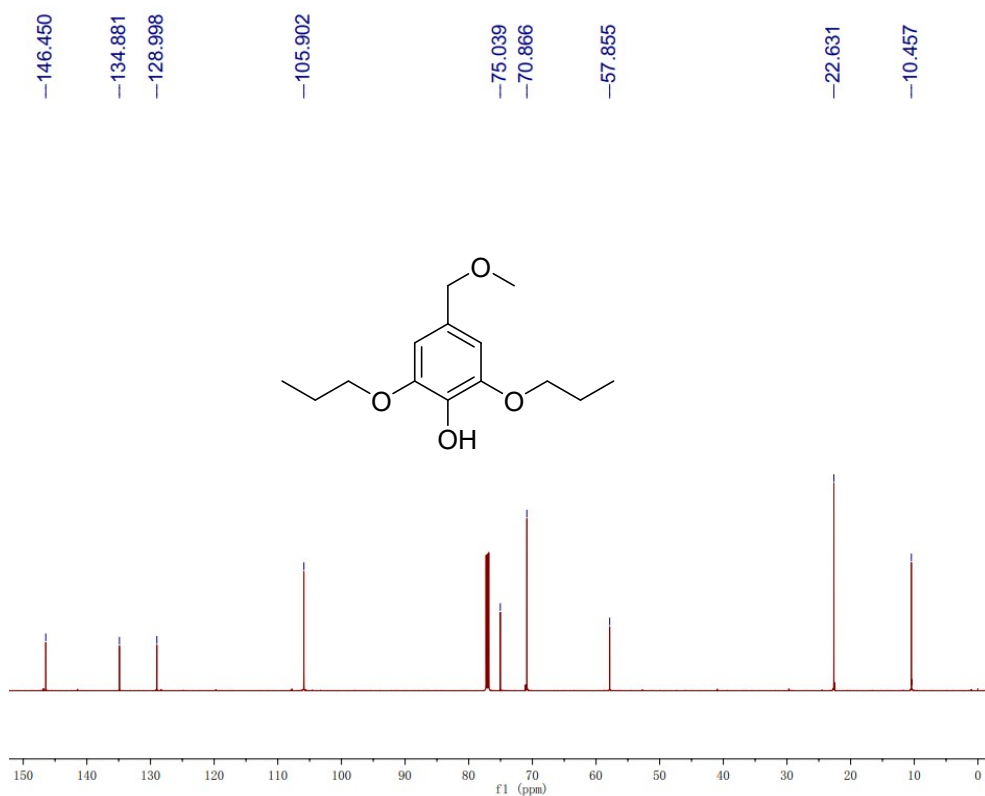

**2,6-Dibutoxy-4-(methoxymethyl)phenol (2d)** [<sup>1</sup>H\_NMR\_400 MHz\_(CDCl<sub>3</sub>: 7.26 ppm)]

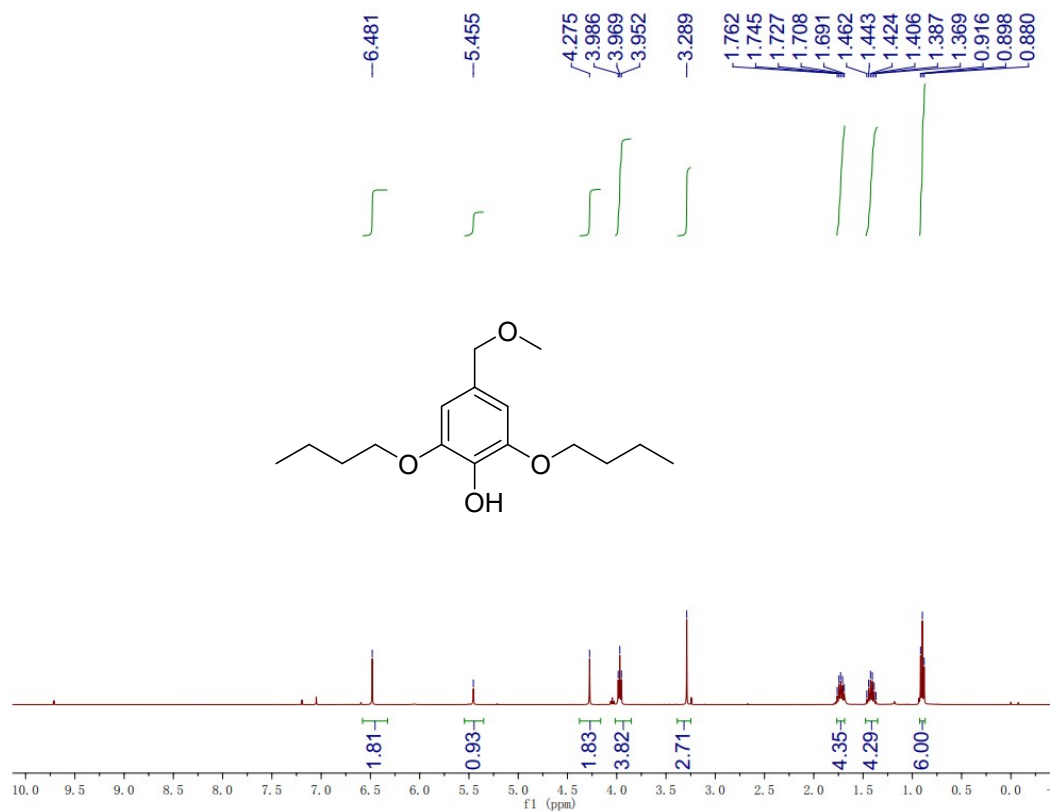

[<sup>13</sup>C\_NMR\_150 MHz\_(CDCl<sub>3</sub>: 77.00 ppm)]

—145.443

—133.838

—127.950

—104.831

—74.026

—68.043

—56.833

—30.343

—18.186

—12.826

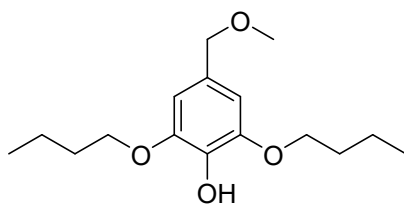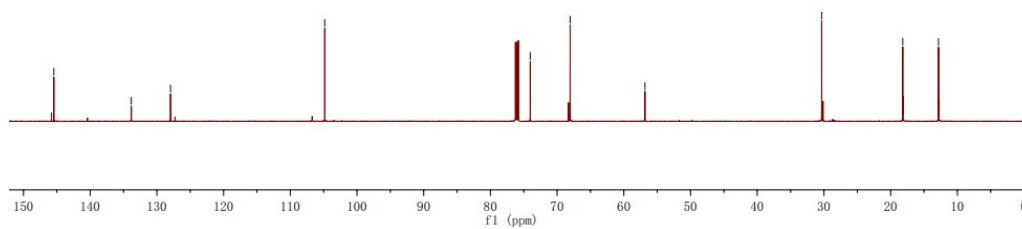

**2,6-Diisobutoxy-4-(methoxymethyl)phenol (2e)** [<sup>1</sup>H\_NMR\_400 MHz\_(CDCl<sub>3</sub>: 7.26 ppm)]

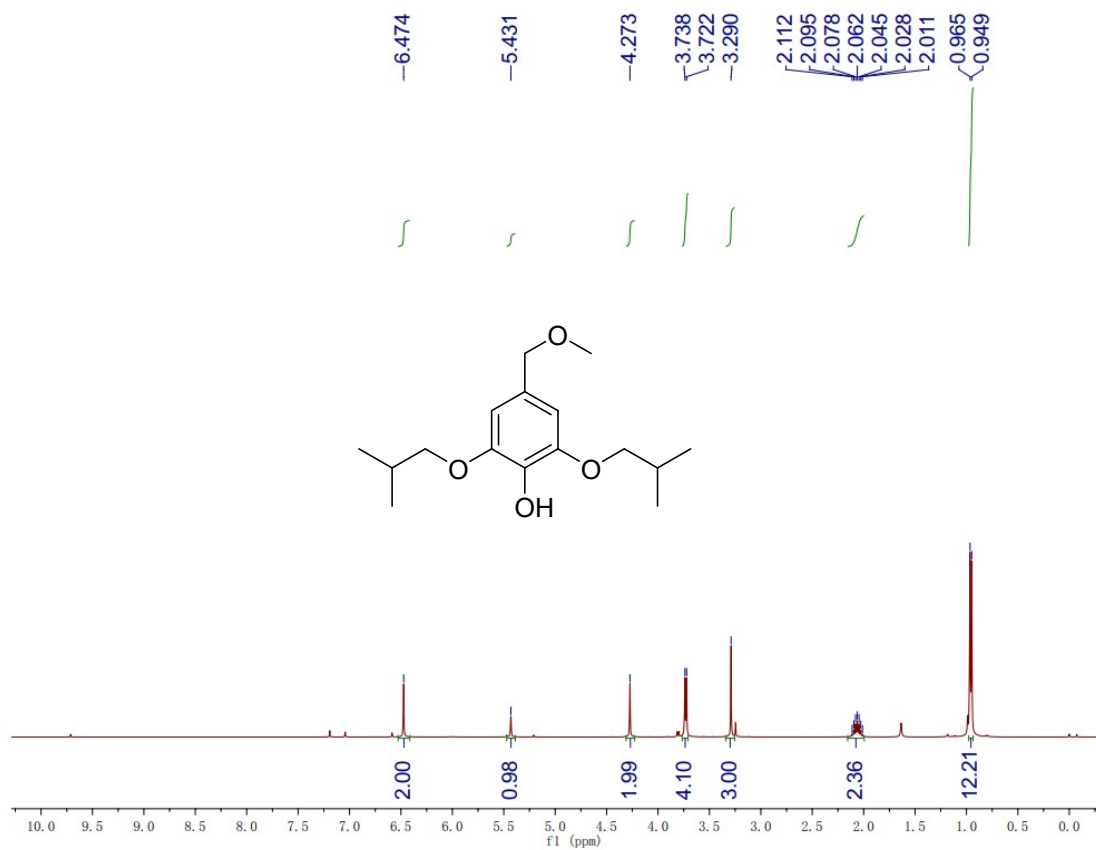

[<sup>13</sup>C\_NMR\_150 MHz\_(CDCl<sub>3</sub>: 77.00 ppm)]

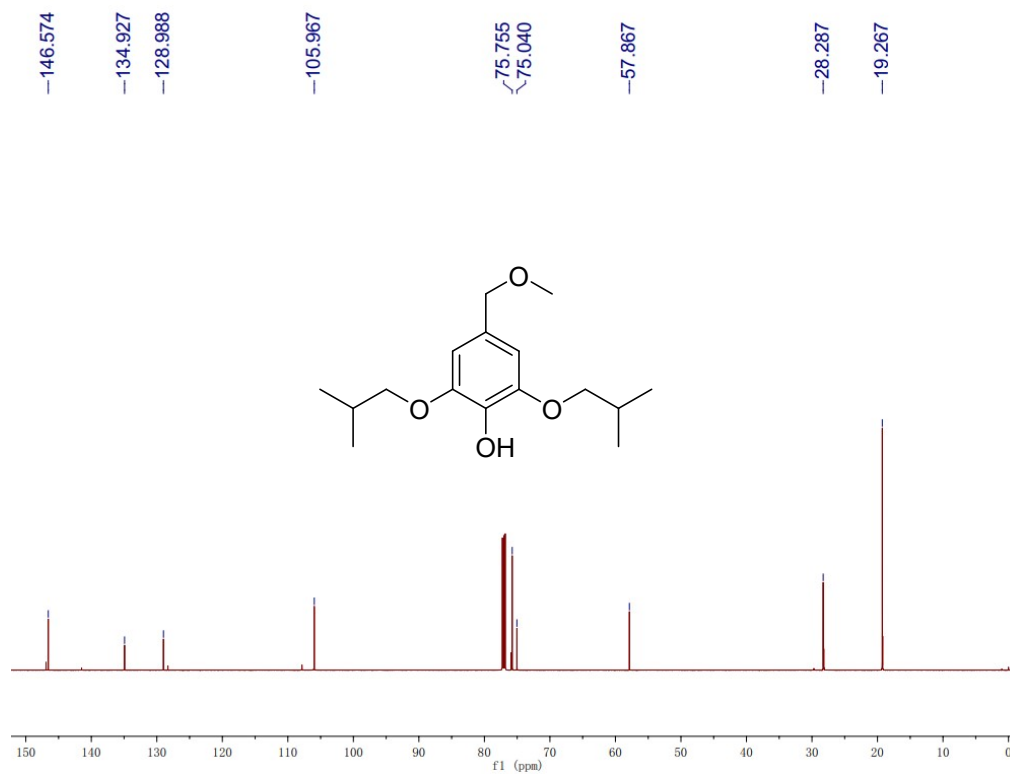

**2-Ethoxy-6-methoxy-4-(methoxymethyl)phenol (2f)** [<sup>1</sup>H\_NMR\_400 MHz\_(DMSO-*d*<sub>6</sub>: 2.50 ppm)]

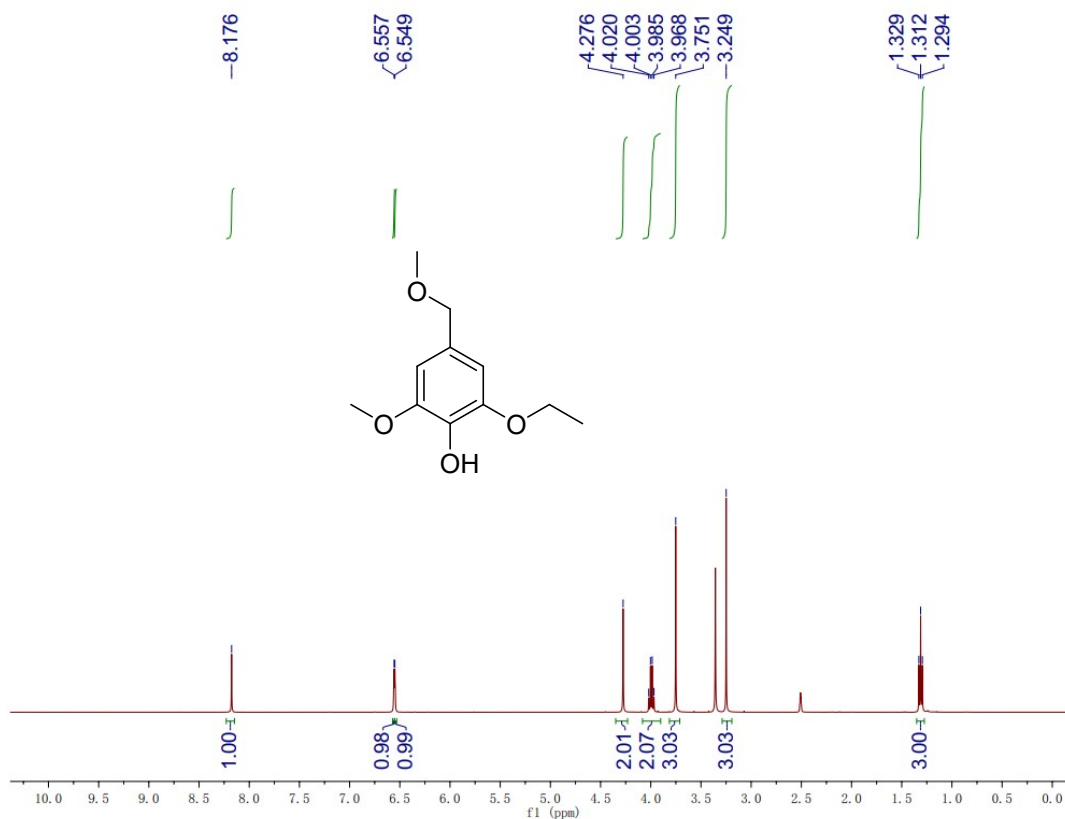

[<sup>13</sup>C\_NMR\_150 MHz\_(DMSO-*d*<sub>6</sub>: 39.52 ppm)]

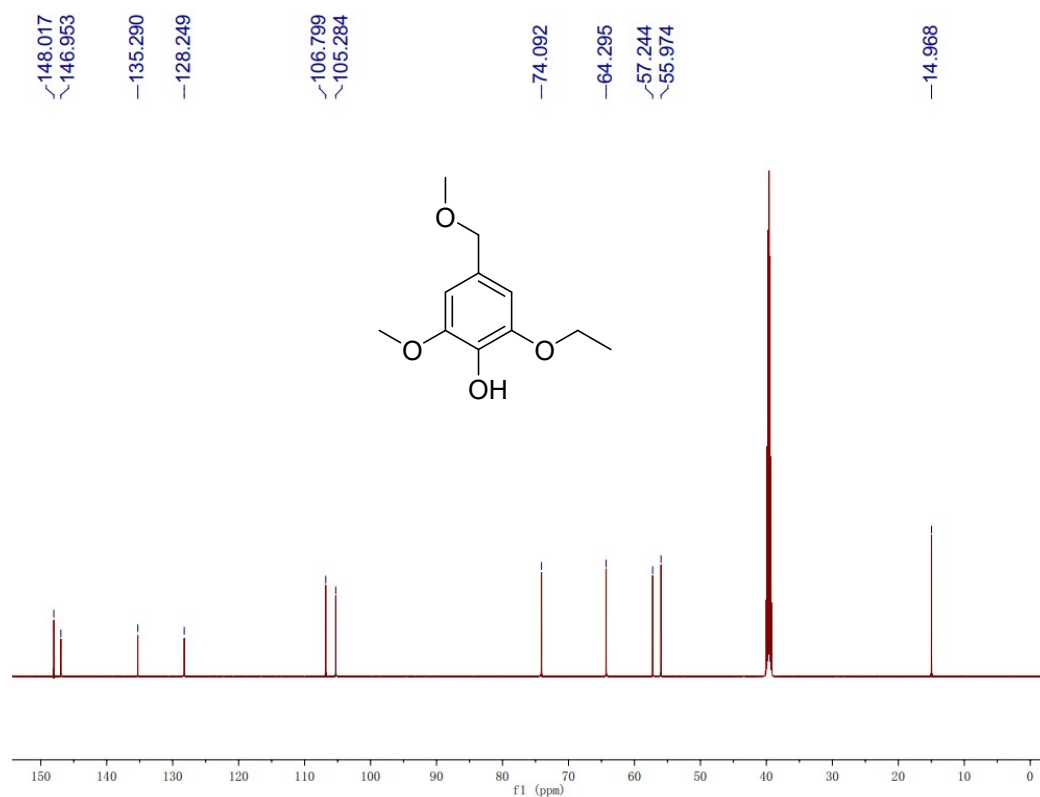

**2-Methoxy-4-(methoxymethyl)-6-propoxyphenol**

**(2g)**

[<sup>1</sup>H\_NMR\_400

MHz\_(DMSO-*d*<sub>6</sub>: 2.50 ppm)]

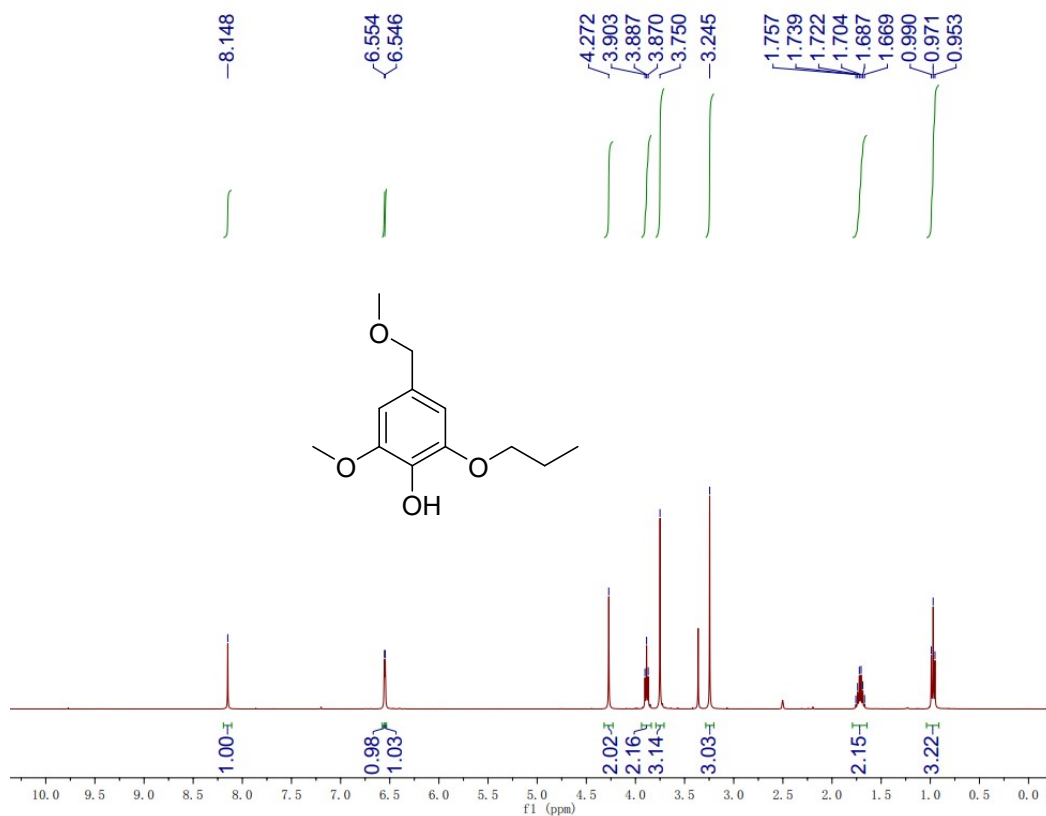

[<sup>13</sup>C\_NMR\_150 MHz\_(DMSO-*d*<sub>6</sub>: 39.52 ppm)]

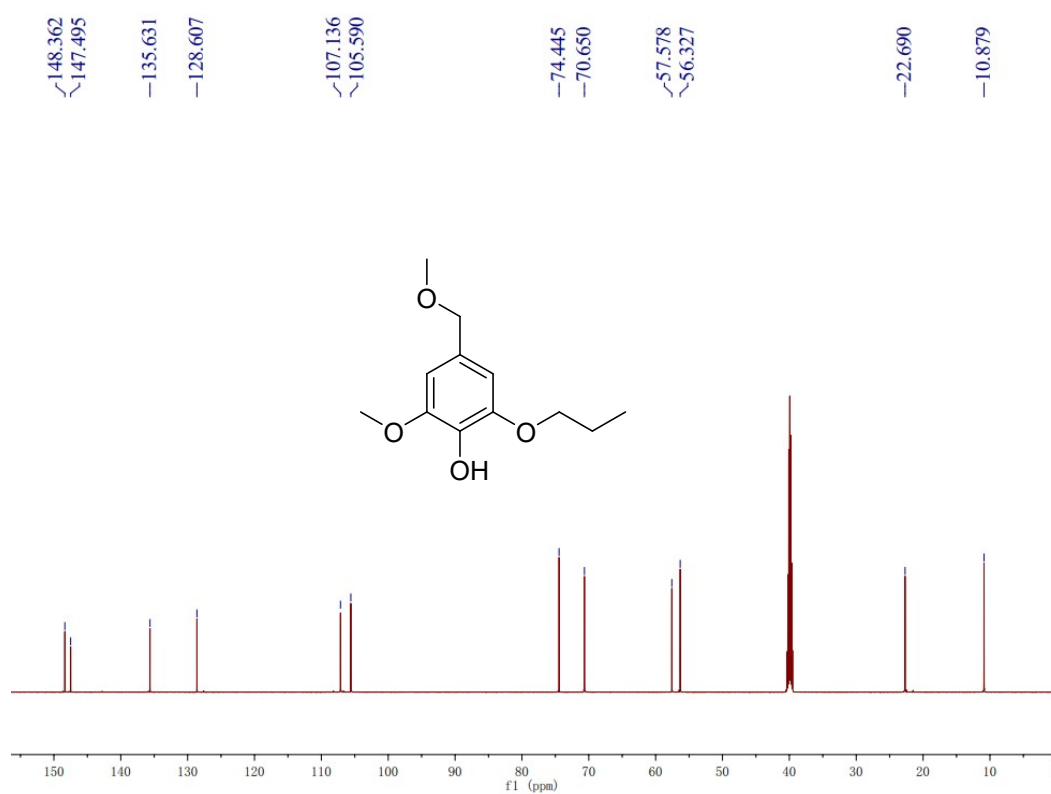

2-Butoxy-6-methoxy-4-(methoxymethyl)phenol

(2h)

[<sup>1</sup>H\_NMR\_400

MHz\_(DMSO-*d*<sub>6</sub>: 2.50 ppm)]

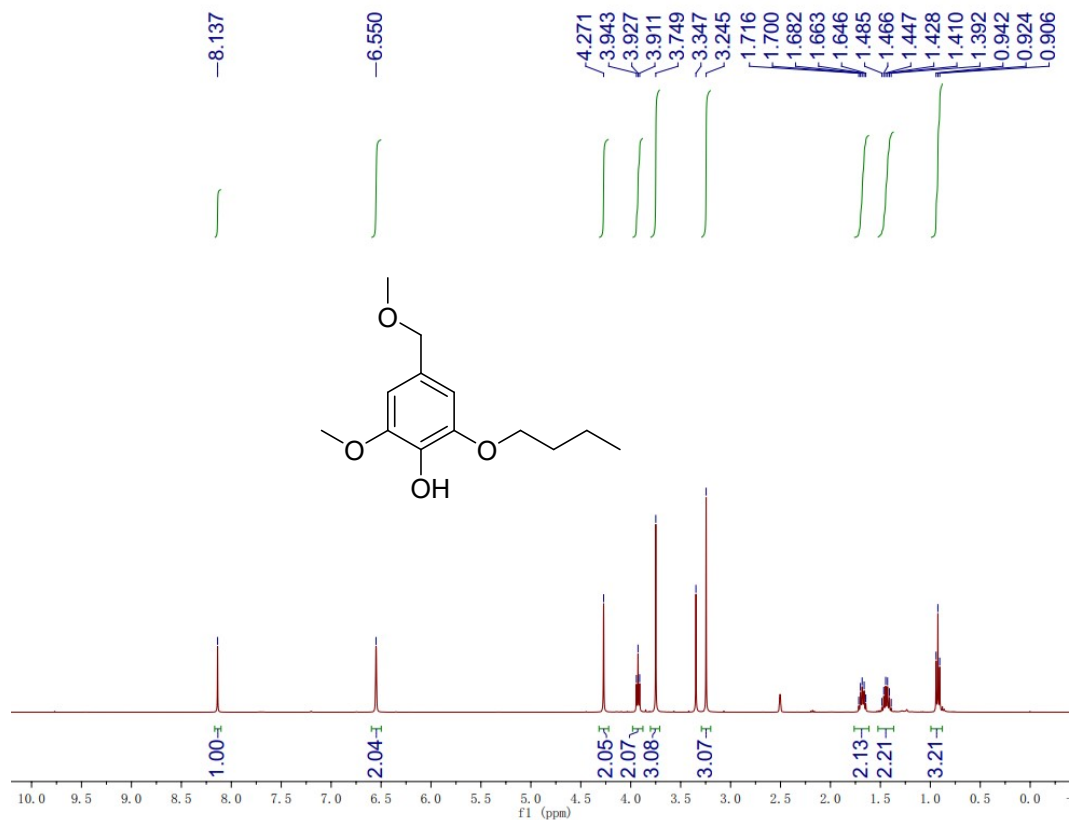

[<sup>13</sup>C\_NMR\_150 MHz\_(DMSO-*d*<sub>6</sub>; 39.52 ppm)]

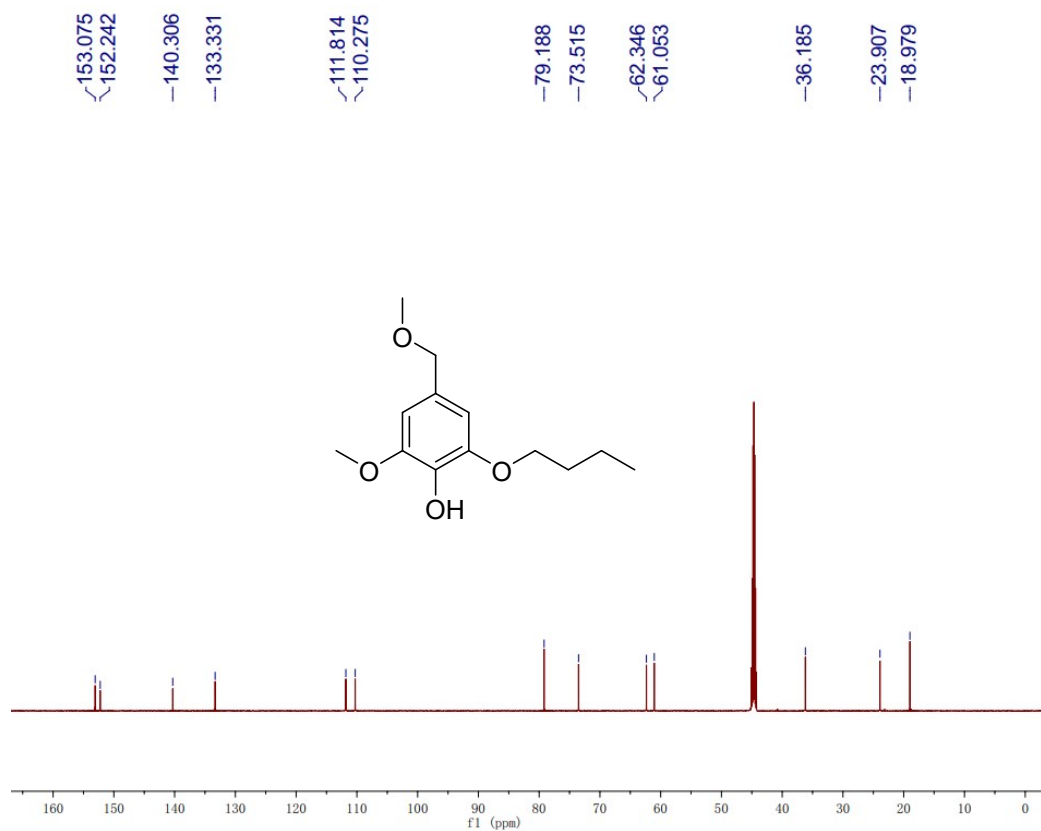

**2-Ethoxy-4-(methoxymethyl)-6-methylphenol (2i)** [<sup>1</sup>H\_NMR\_400 MHz\_(CDCl<sub>3</sub>: 7.26 ppm)]

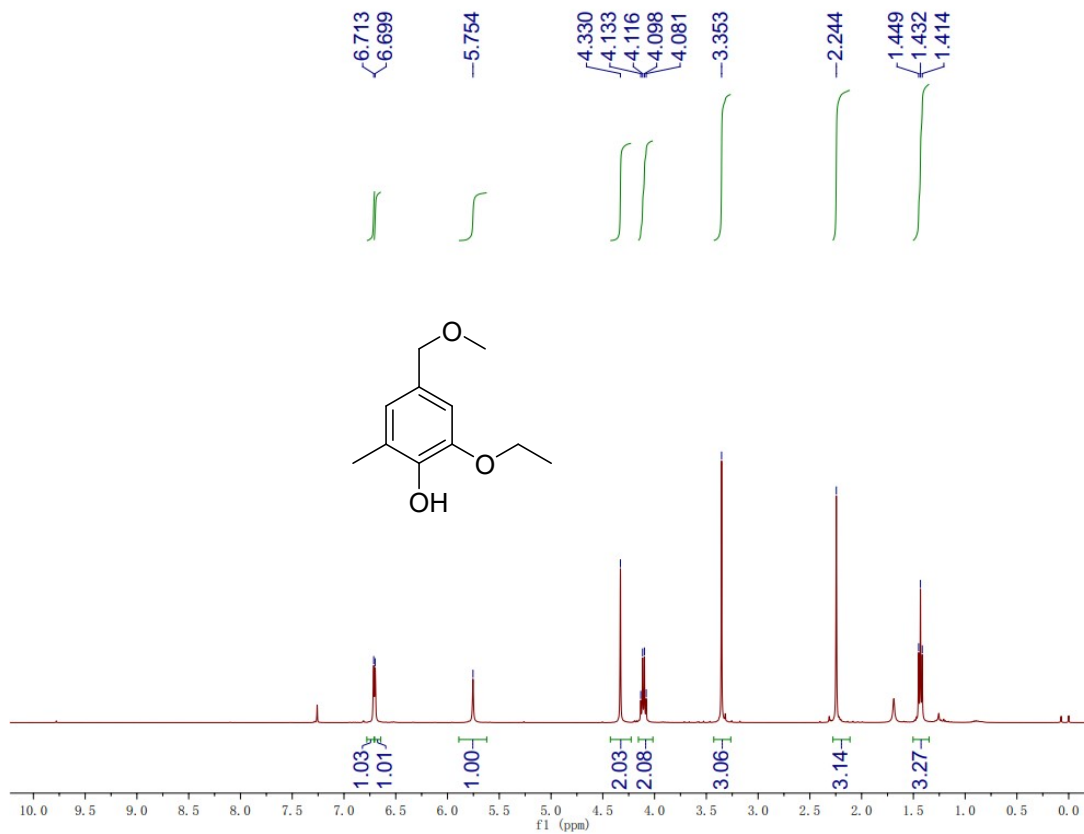

[<sup>13</sup>C\_NMR\_150 MHz\_(CDCl<sub>3</sub>: 77.00 ppm)]

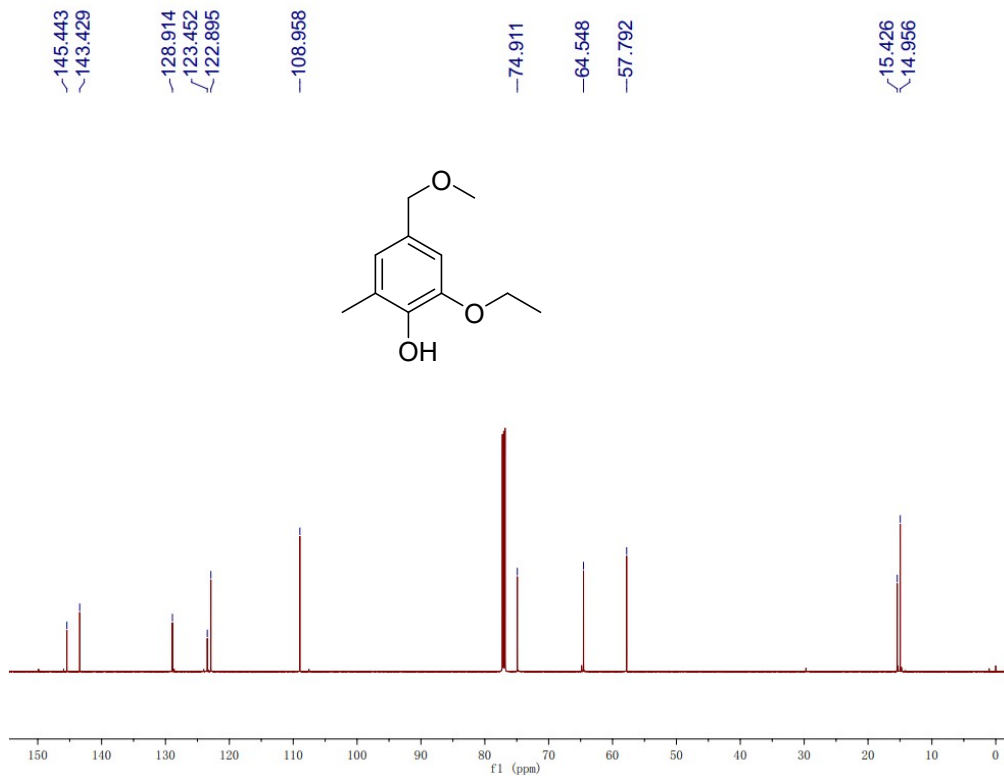

**4-(Methoxymethyl)-2-methyl-6-propoxyphenol (2j)** [<sup>1</sup>H\_NMR\_400 MHz\_(CDCl<sub>3</sub>: 7.26 ppm)]

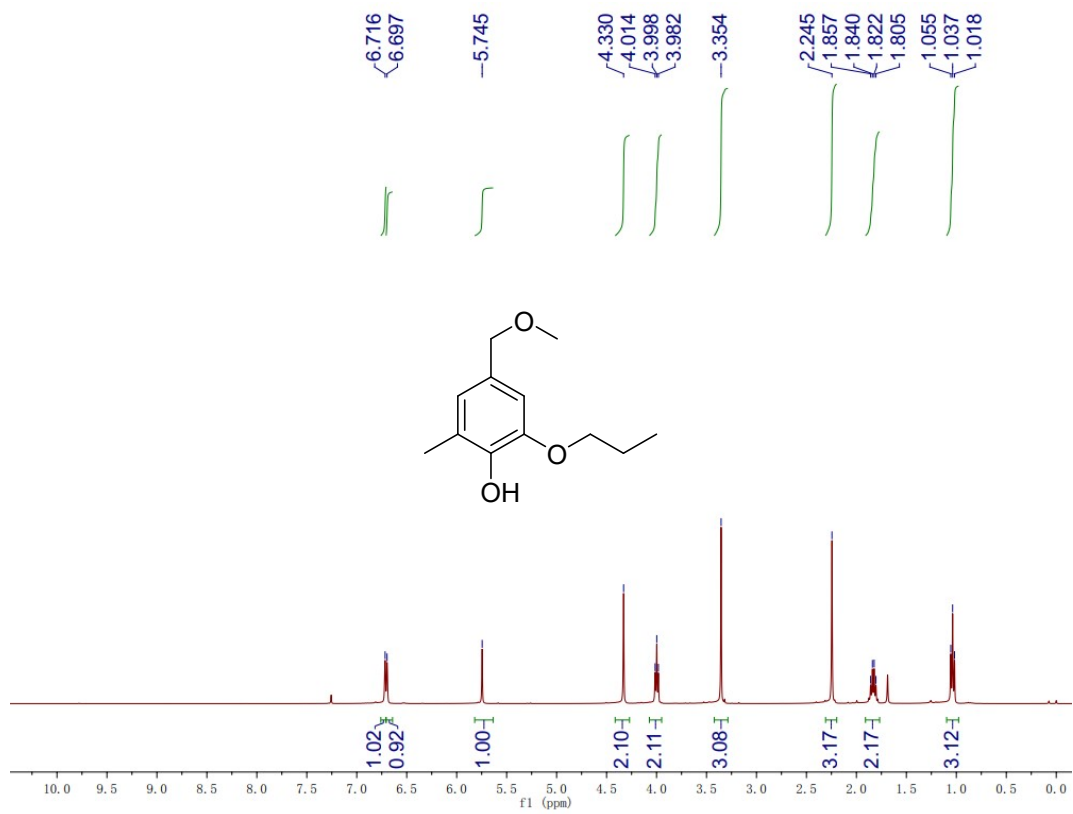

[<sup>13</sup>C\_NMR\_150 MHz\_(CDCl<sub>3</sub>: 77.00 ppm)]

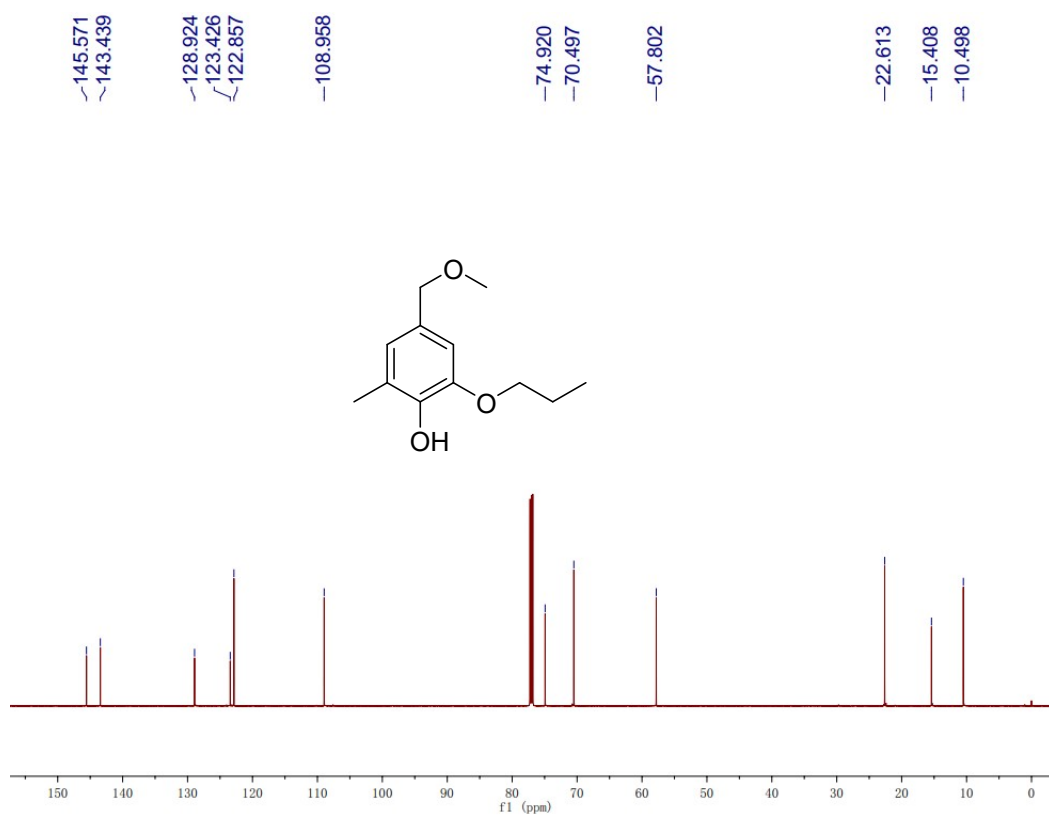

**2-Isopropoxy-4-(methoxymethyl)-6-methylphenol (2k)** [<sup>1</sup>H\_NMR\_400 MHz\_(CDCl<sub>3</sub>: 7.26 ppm)]



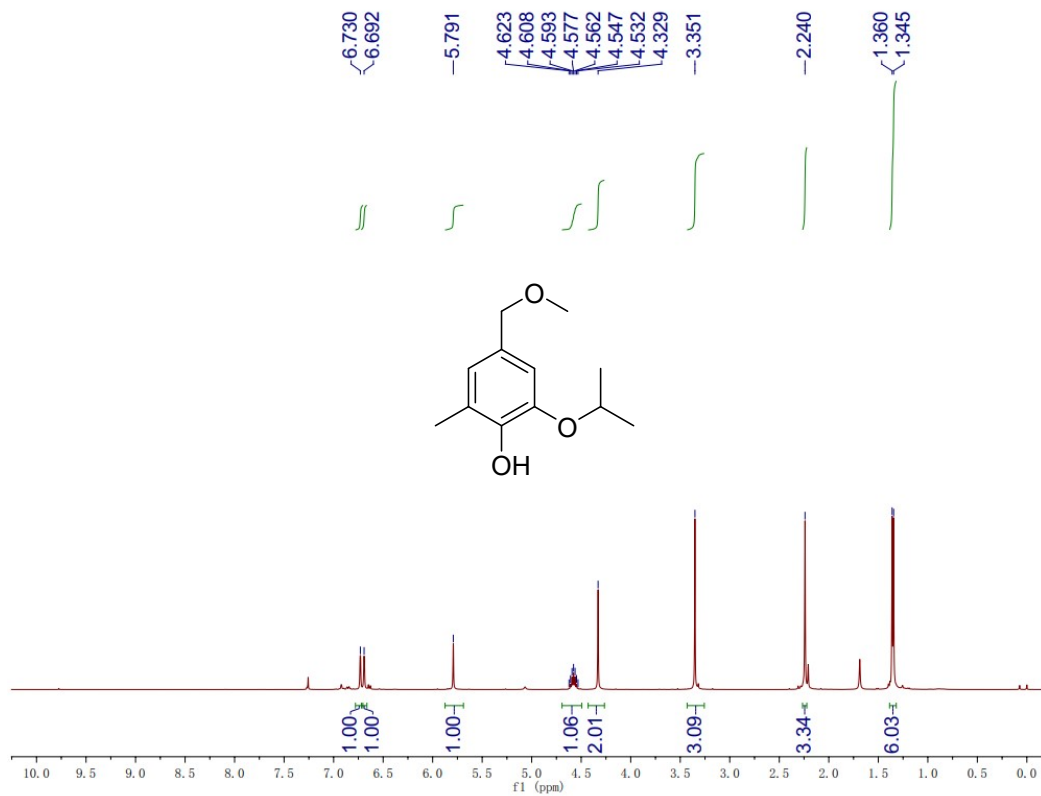

[<sup>13</sup>C\_NMR\_150 MHz\_(CDCl<sub>3</sub>: 77.00 ppm)]

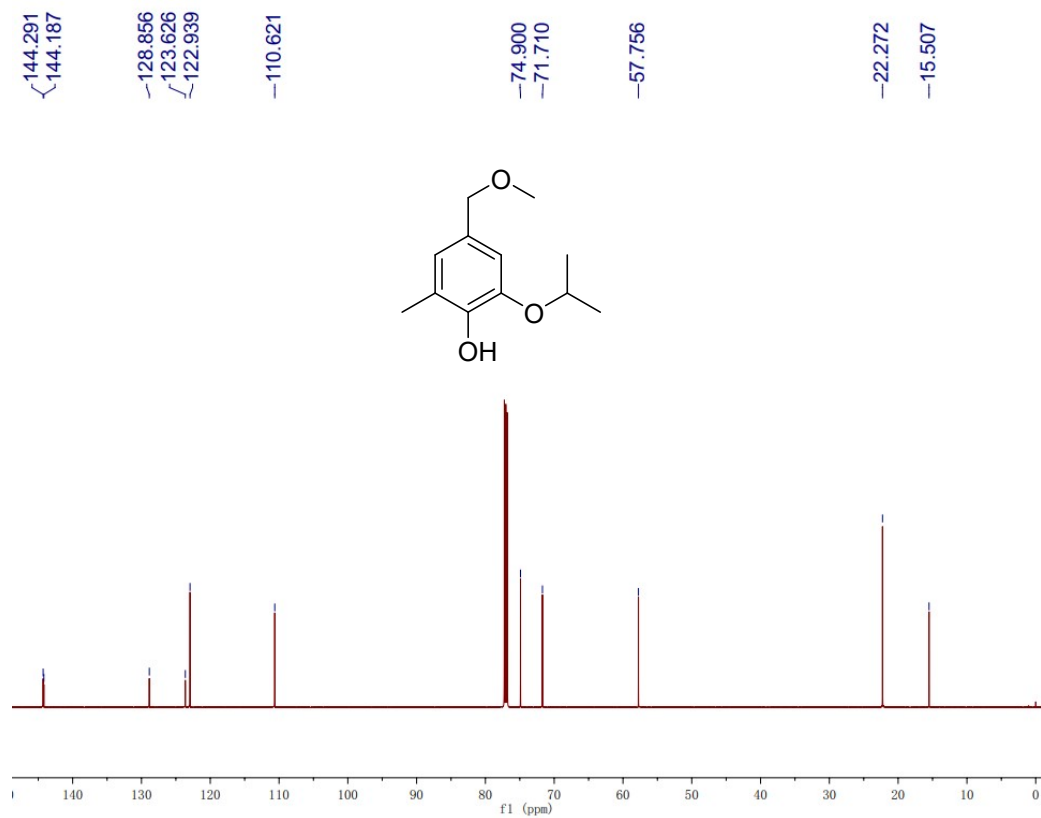

**2-Butoxy-4-(methoxymethyl)-6-methylphenol (2l)** [<sup>1</sup>H\_NMR\_400 MHz\_(CDCl<sub>3</sub>: 7.26 ppm)]

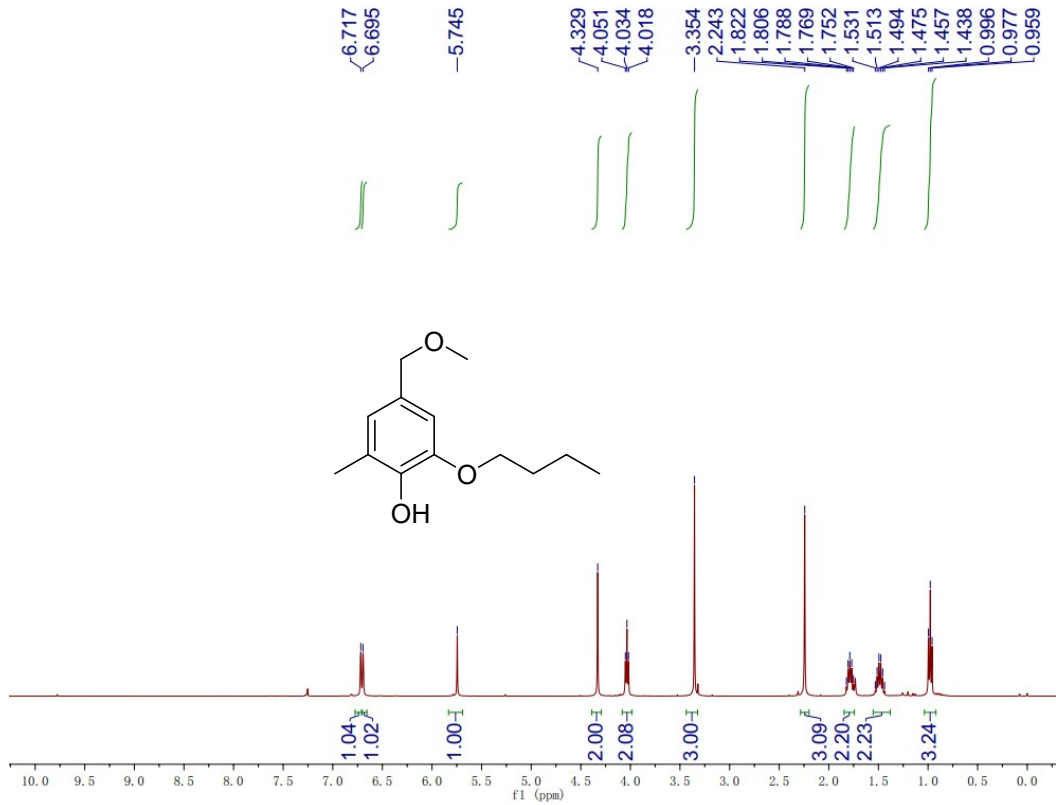

[<sup>13</sup>C\_NMR\_150 MHz\_(CDCl<sub>3</sub>: 77.00 ppm)]

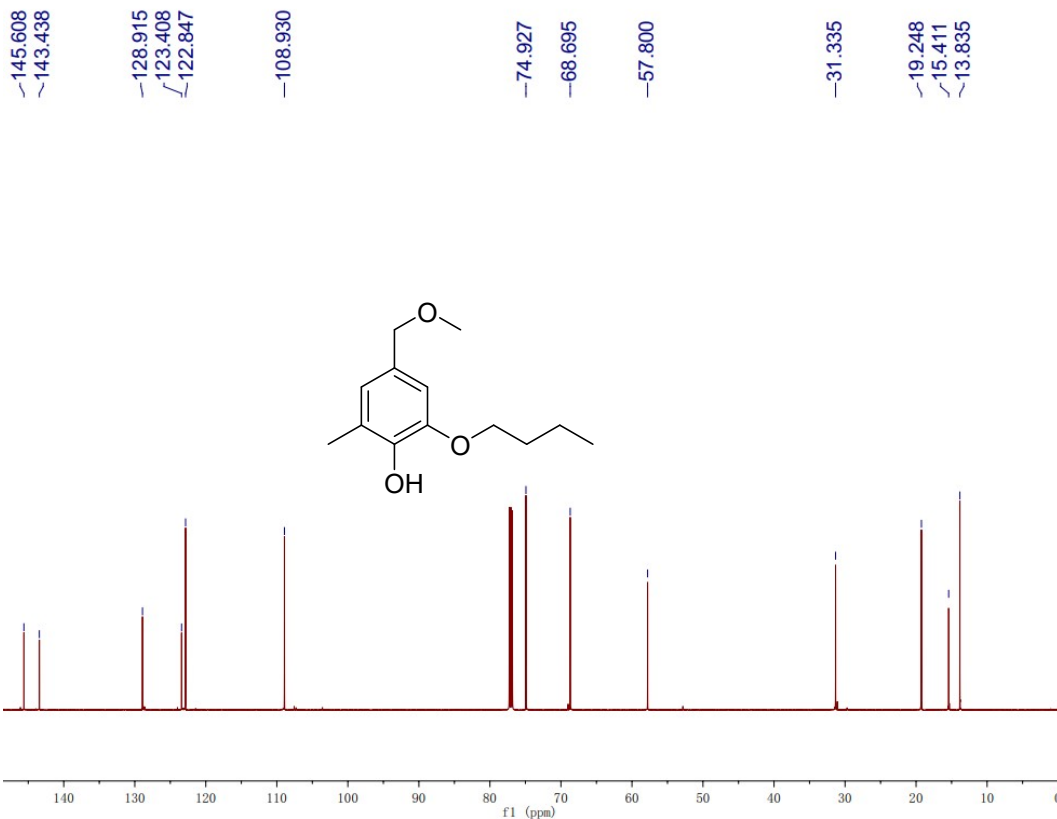

**2-Isobutoxy-4-(methoxymethyl)-6-methylphenol (2m)** [<sup>1</sup>H\_NMR\_400 MHz\_(CDCl<sub>3</sub>: 7.26 ppm)]

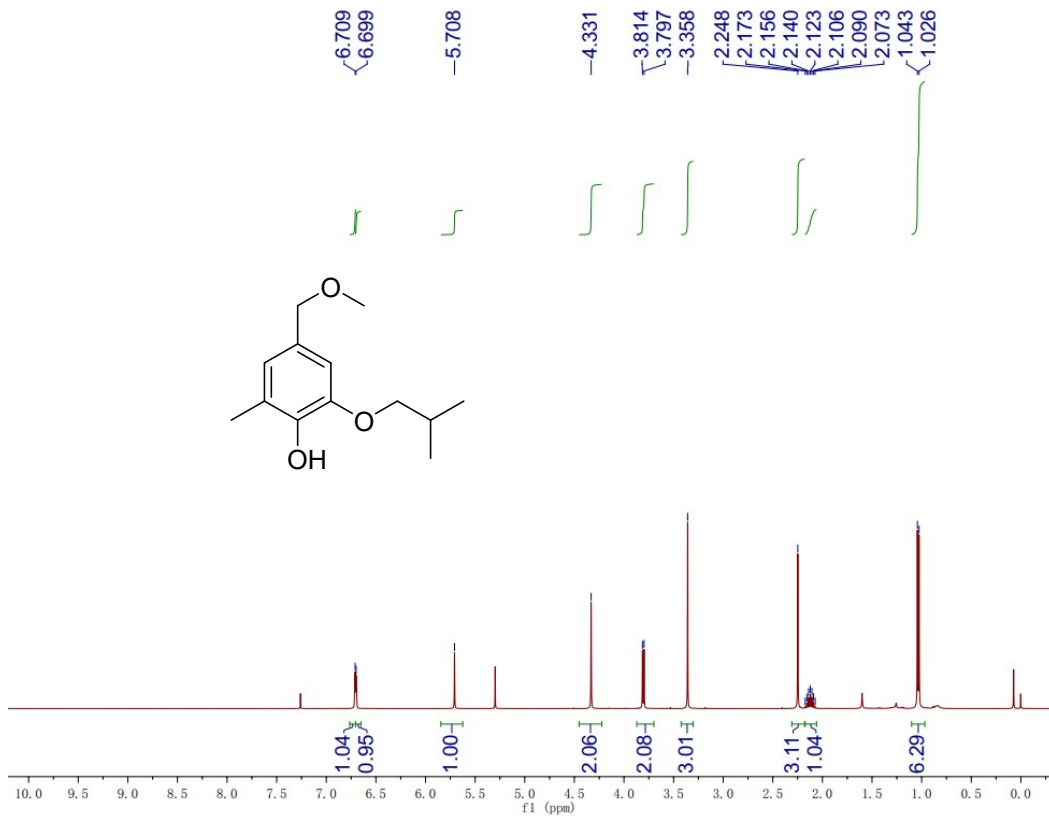

[<sup>13</sup>C\_NMR\_150 MHz\_(CDCl<sub>3</sub>: 77.00 ppm)]

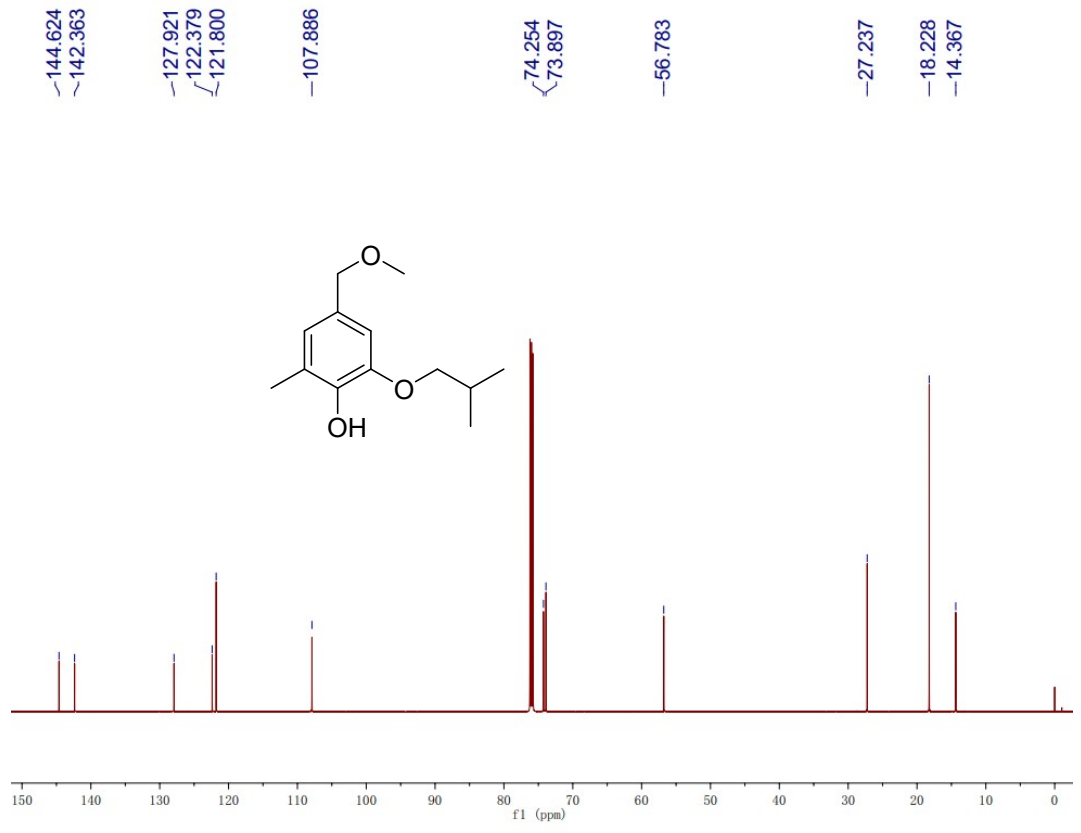

**2,6-Dimethoxy-4-(1-methoxyethyl)phenol (2n)** [<sup>1</sup>H\_NMR\_400 MHz\_(CDCl<sub>3</sub>: 7.26 ppm)]

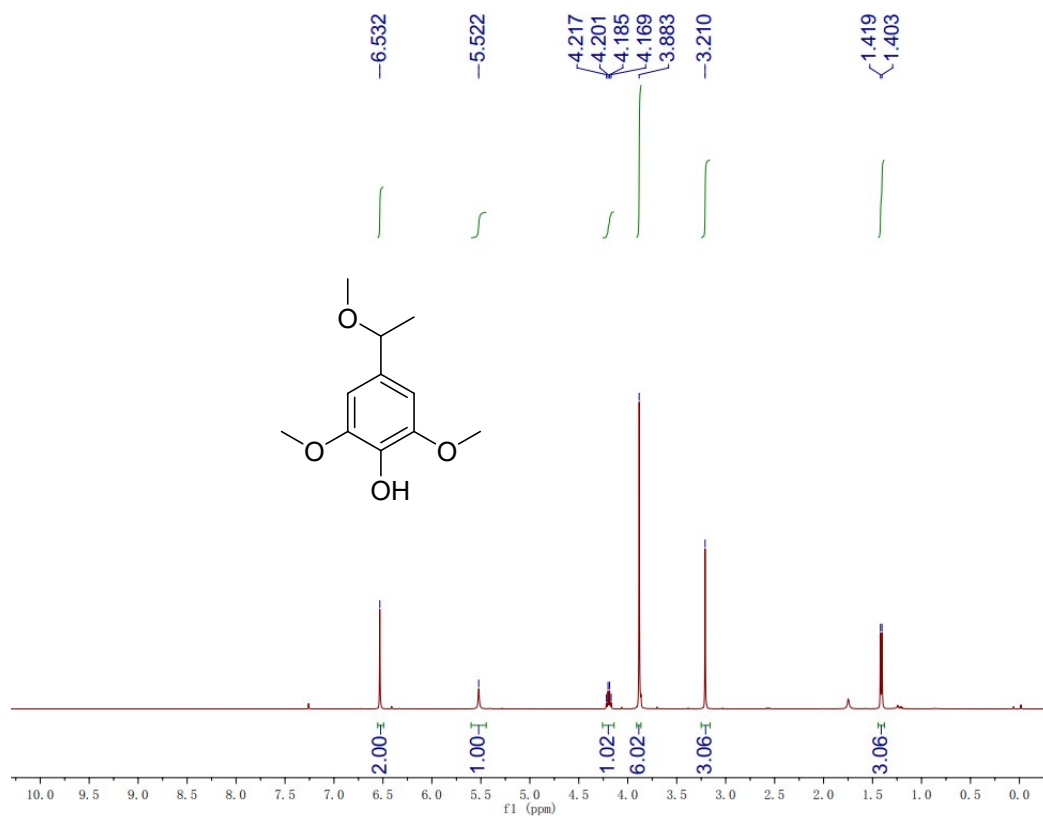

[<sup>13</sup>C\_NMR\_150 MHz\_(CDCl<sub>3</sub>: 77.00 ppm)]

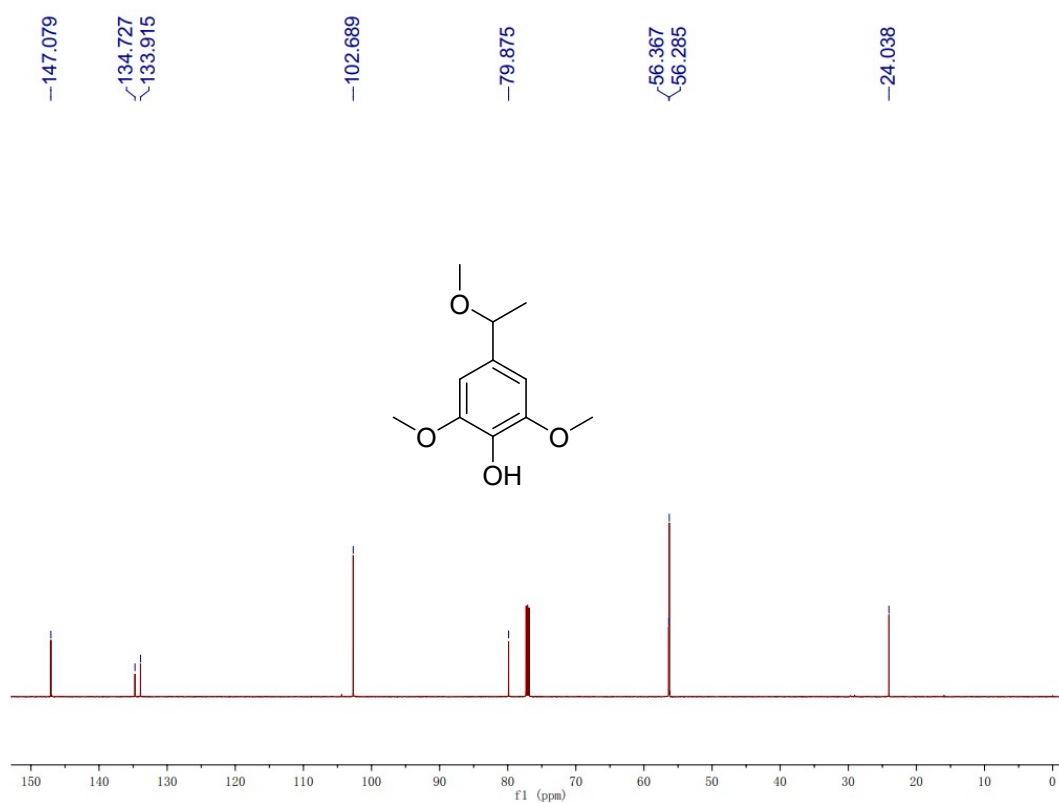

**2,6-Diethoxy-4-(1-methoxyethyl)phenol (2o)** [<sup>1</sup>H\_NMR\_400 MHz\_(CDCl<sub>3</sub>: 7.26 ppm)]

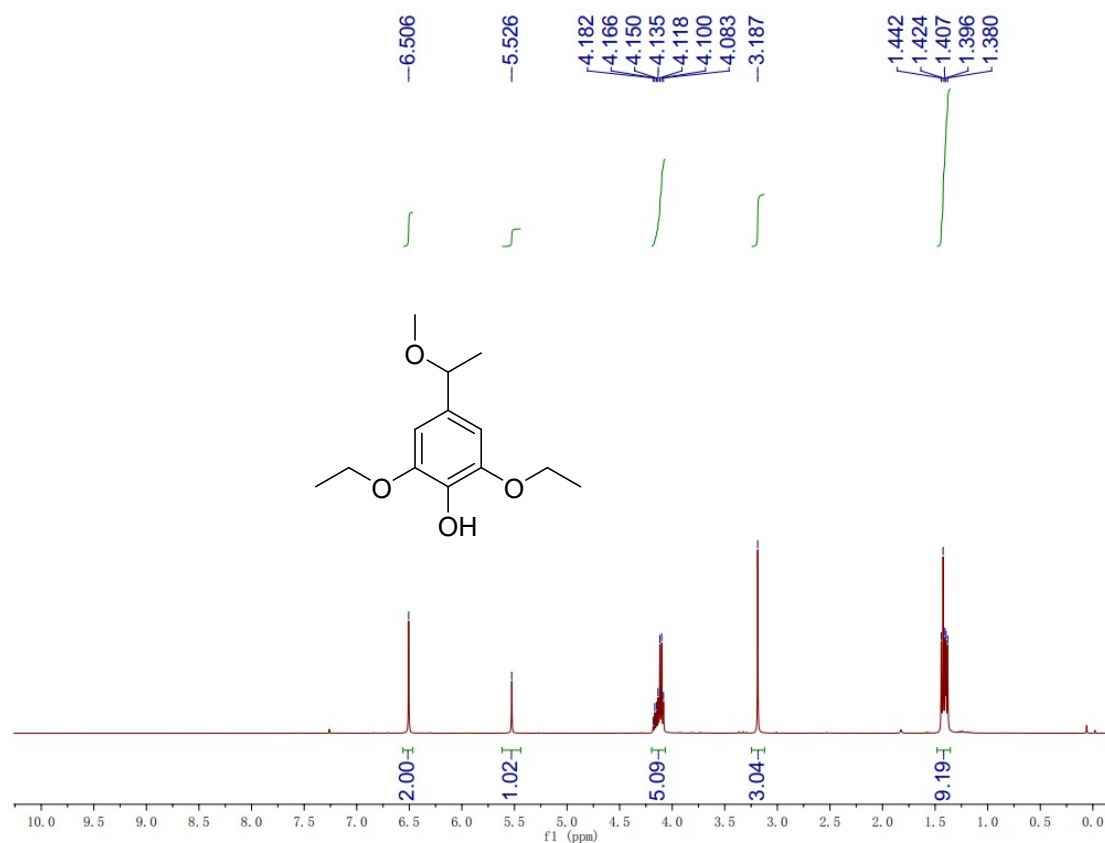

[ $^{13}\text{C}$ \_NMR\_150 MHz\_( $\text{CDCl}_3$ : 77.00 ppm)]

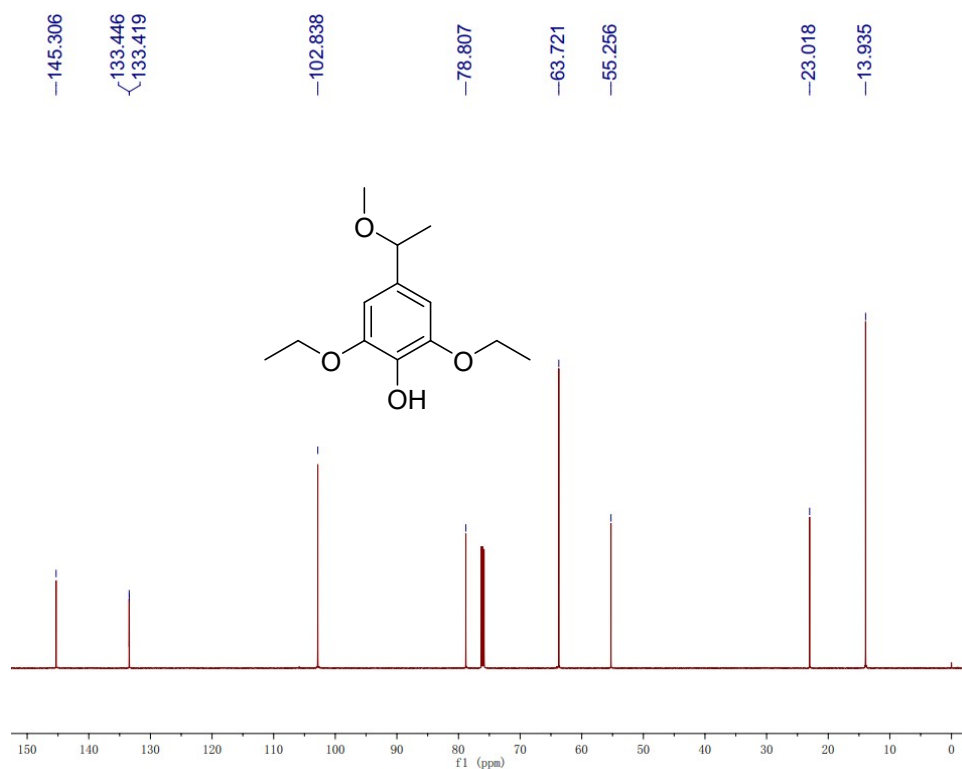

**4-(1-Methoxyethyl)-2,6-dipropoxyphenol (2p)** [ $^1\text{H}$ \_NMR\_600 MHz\_( $\text{CDCl}_3$ : 7.26 ppm)]

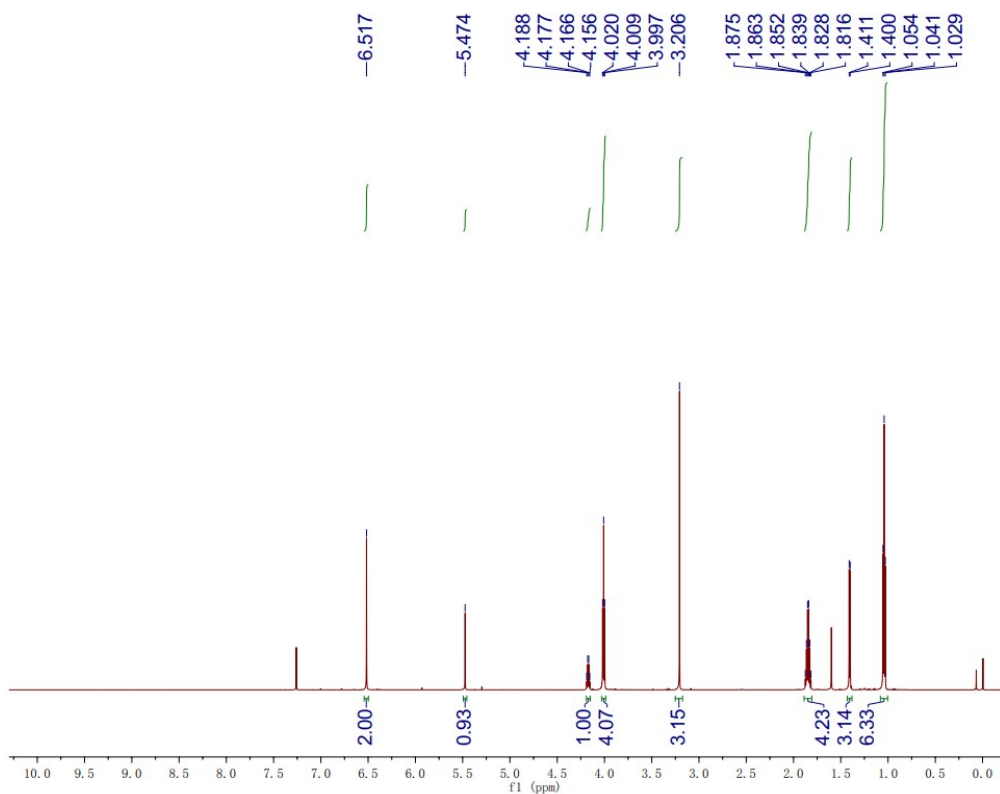

[<sup>13</sup>C\_NMR\_150 MHz\_(CDCl<sub>3</sub>: 77.00 ppm)]

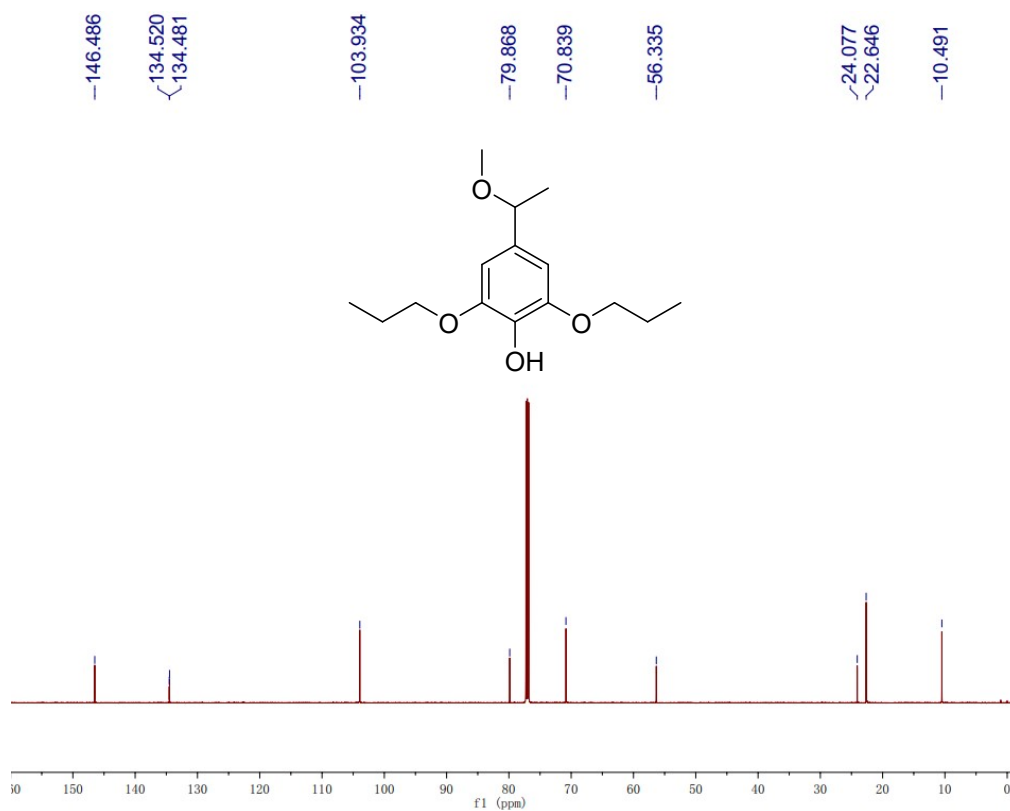

**2,6-Dibutoxy-4-(1-methoxyethyl)phenol (2q)** [<sup>1</sup>H\_NMR\_600 MHz\_(CDCl<sub>3</sub>: 7.26 ppm)]

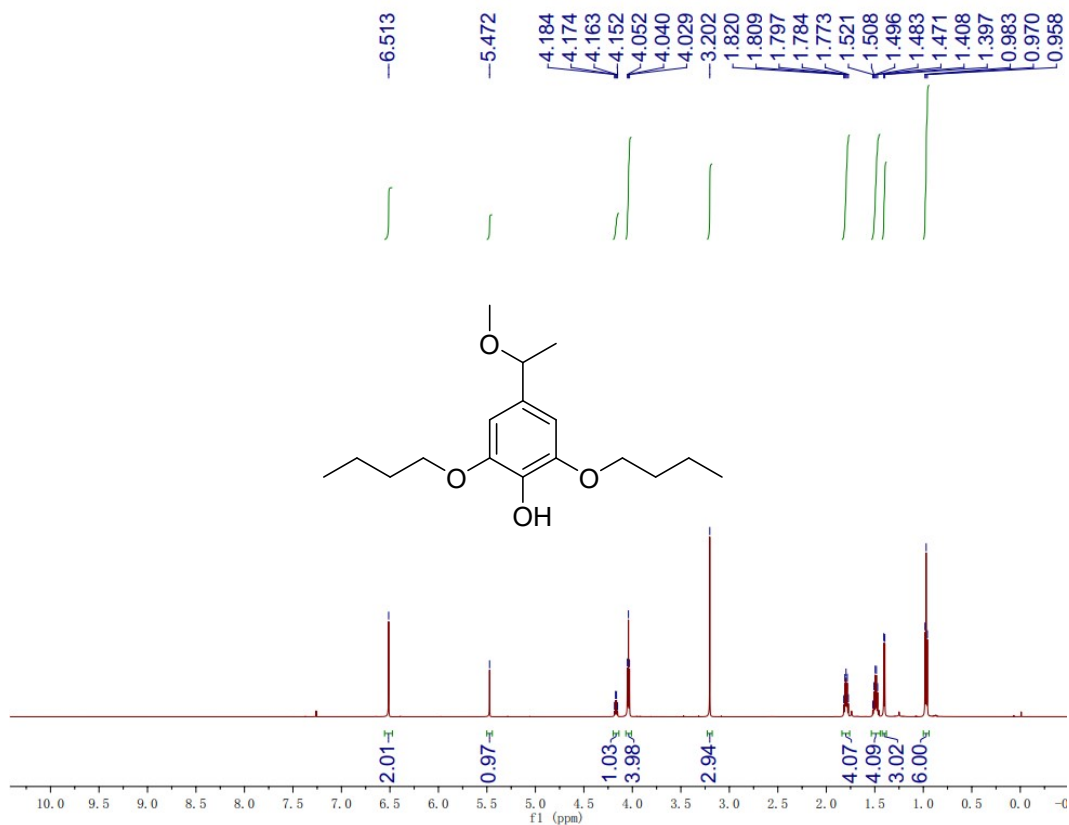

[<sup>13</sup>C\_NMR\_150 MHz\_(CDCl<sub>3</sub>: 77.00 ppm)]

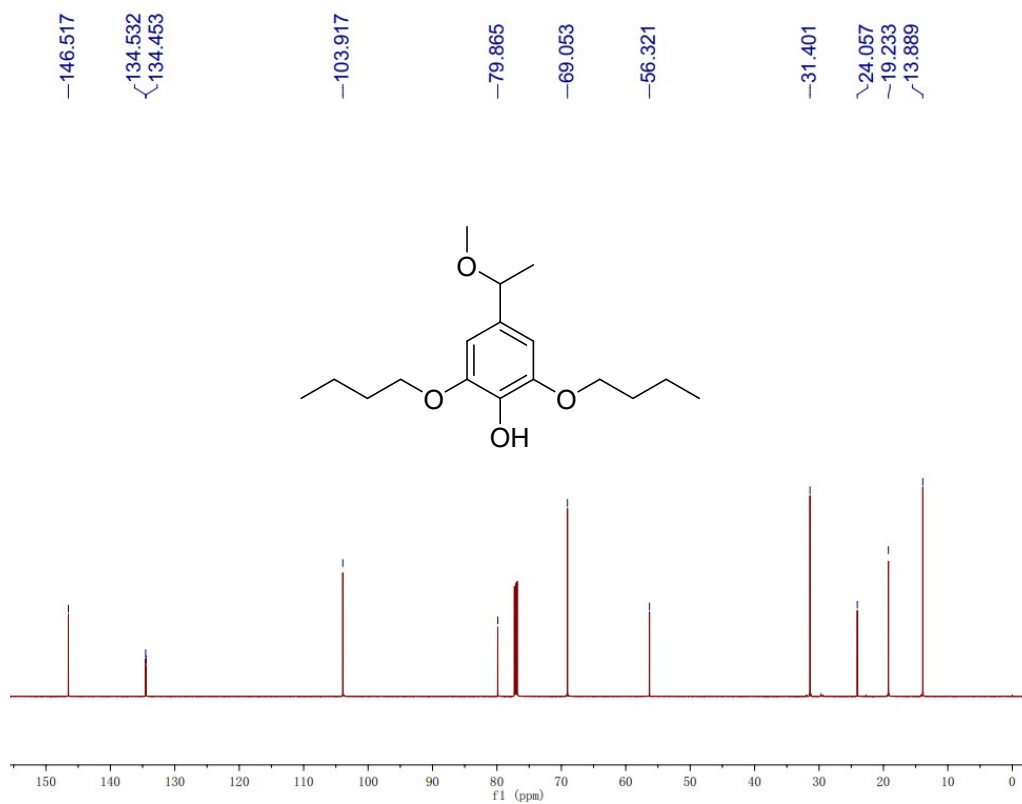

**2-Methoxy-4-(1-methoxyethyl)-6-methylphenol (2r)** [<sup>1</sup>H\_NMR\_400 MHz\_(CDCl<sub>3</sub>: 7.26 ppm)]

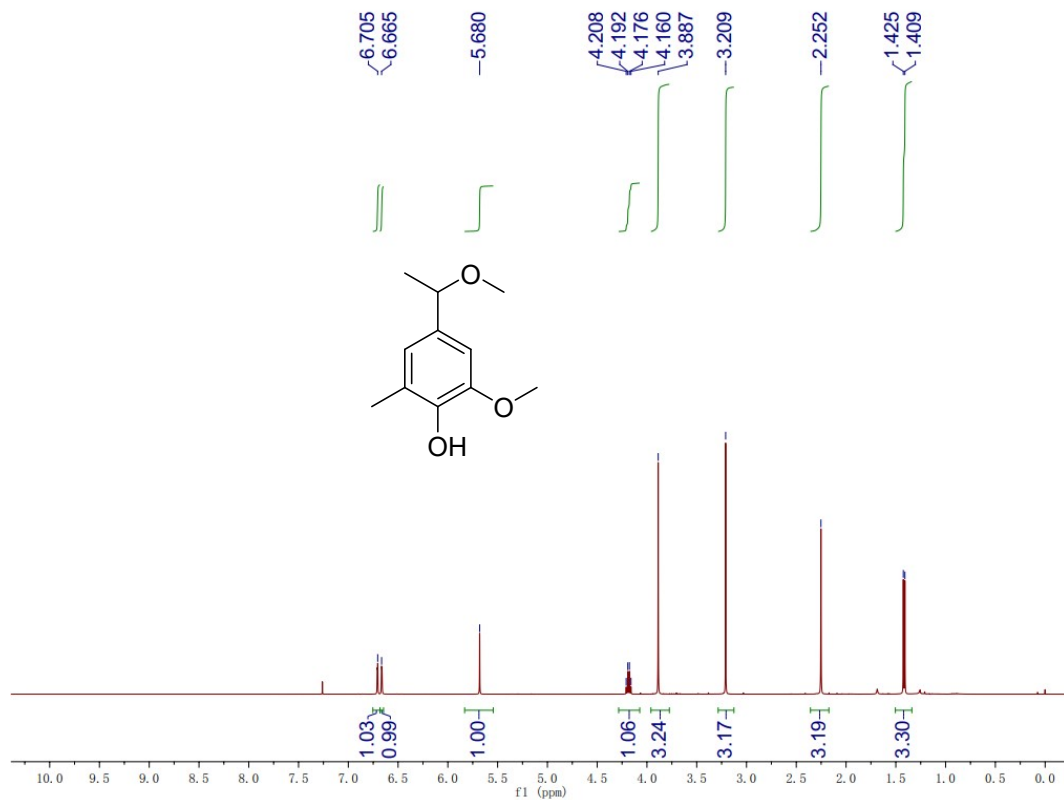

[<sup>13</sup>C\_NMR\_100 MHz\_(CDCl<sub>3</sub>: 77.00 ppm)]

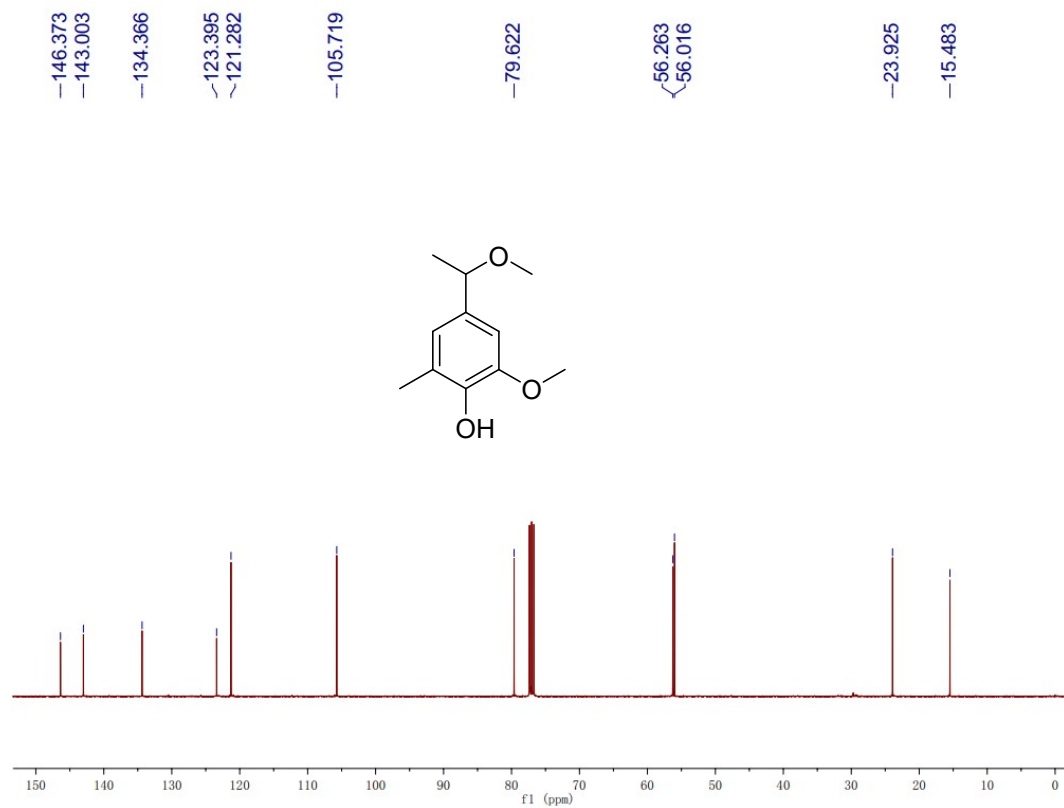

**2-Ethoxy-4-(1-methoxyethyl)-6-methylphenol (2s)** [<sup>1</sup>H\_NMR\_400 MHz\_(CDCl<sub>3</sub>: 7.26 ppm)]



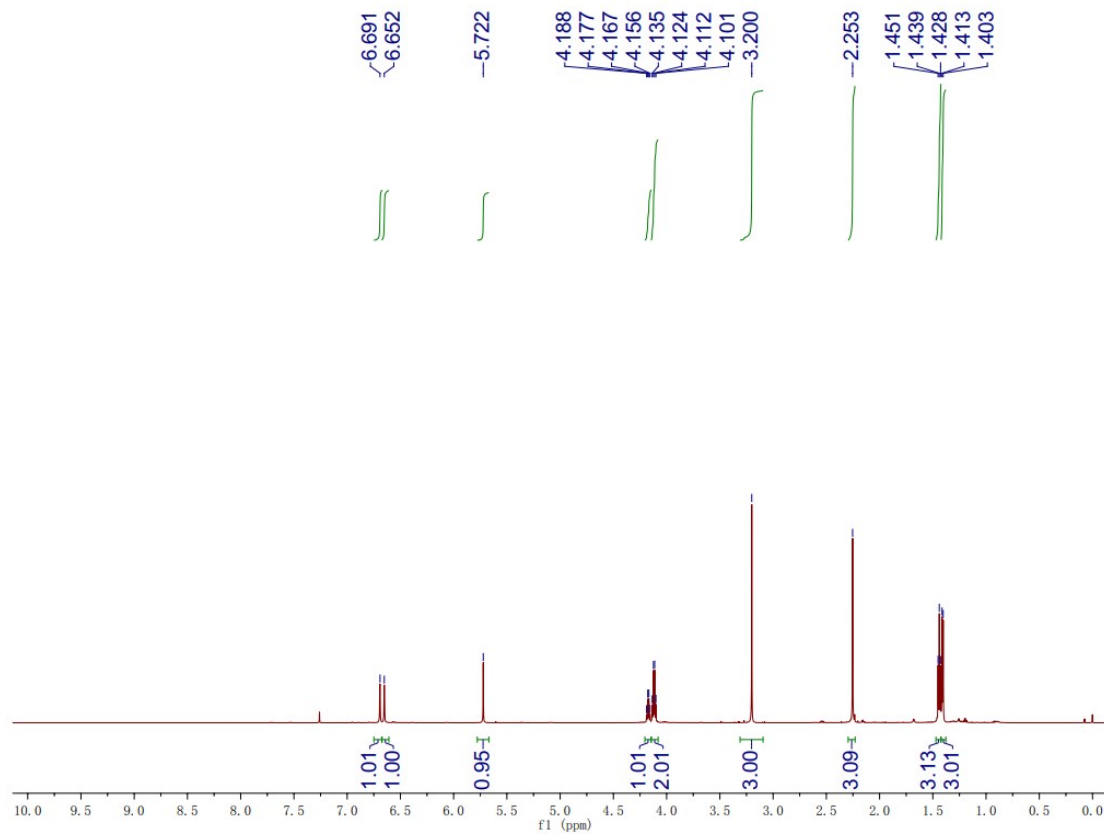

[<sup>13</sup>C\_NMR\_100 MHz\_(CDCl<sub>3</sub>: 77.00 ppm)]

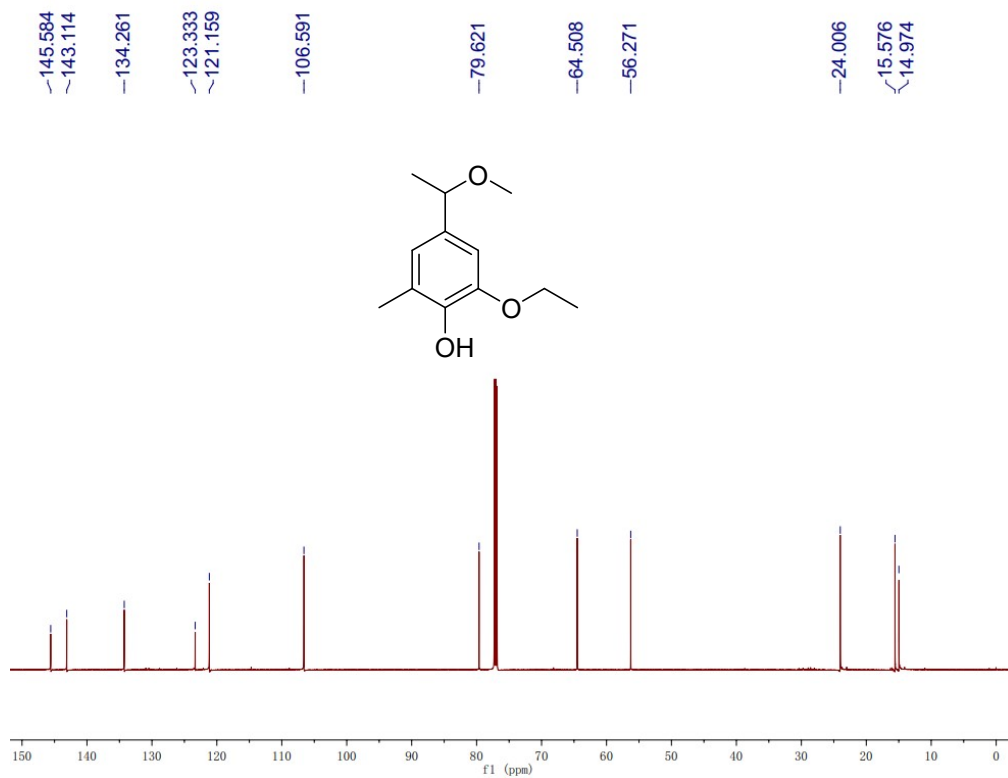

**2,6-Dimethoxy-4-(1-methoxypropyl)phenol (2t)** [<sup>1</sup>H\_NMR\_600 MHz\_(CDCl<sub>3</sub>: 7.26 ppm)]

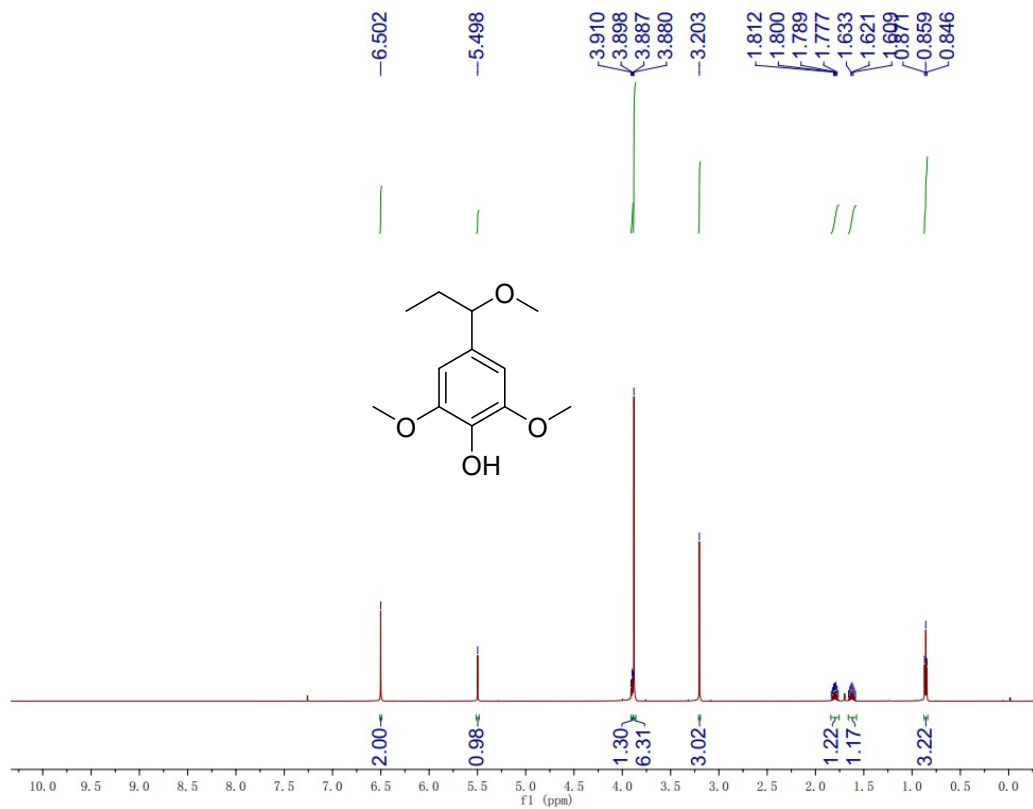

[<sup>13</sup>C\_NMR\_150 MHz\_(CDCl<sub>3</sub>: 77.00 ppm)]

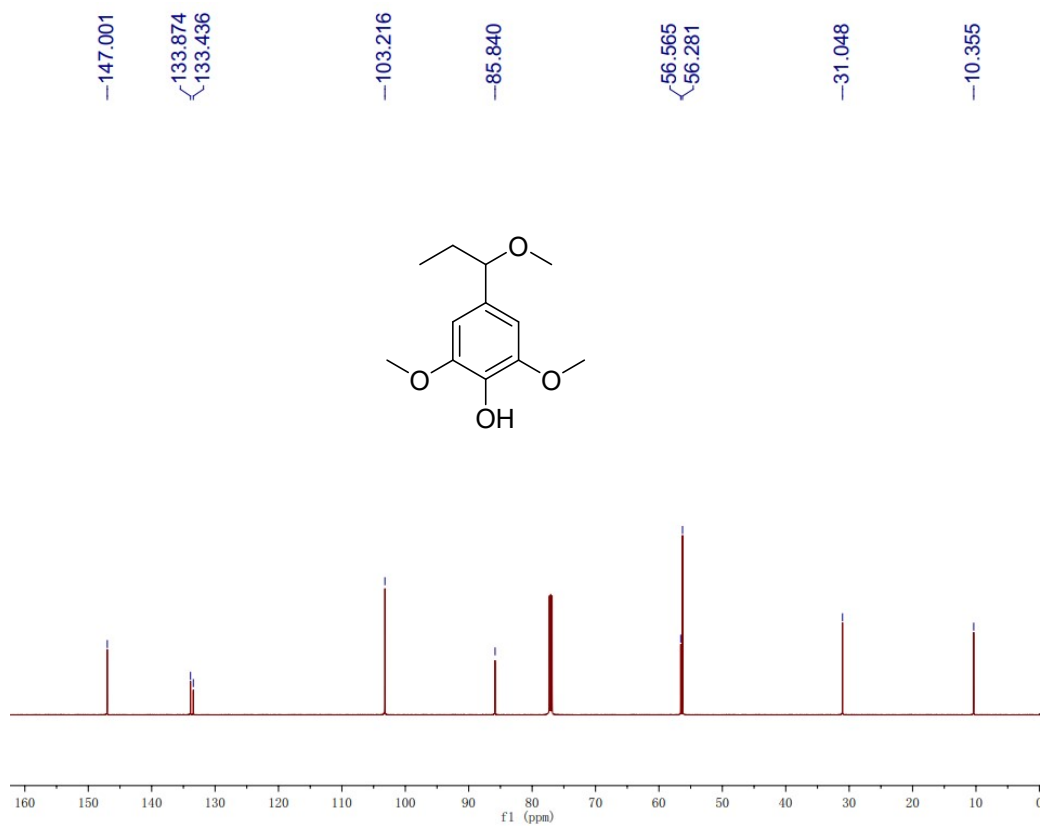

**2,6-Dimethoxy-4-(1-methoxybutyl)phenol (2u)** [<sup>1</sup>H\_NMR\_600 MHz\_(CDCl<sub>3</sub>: 7.26 ppm)]

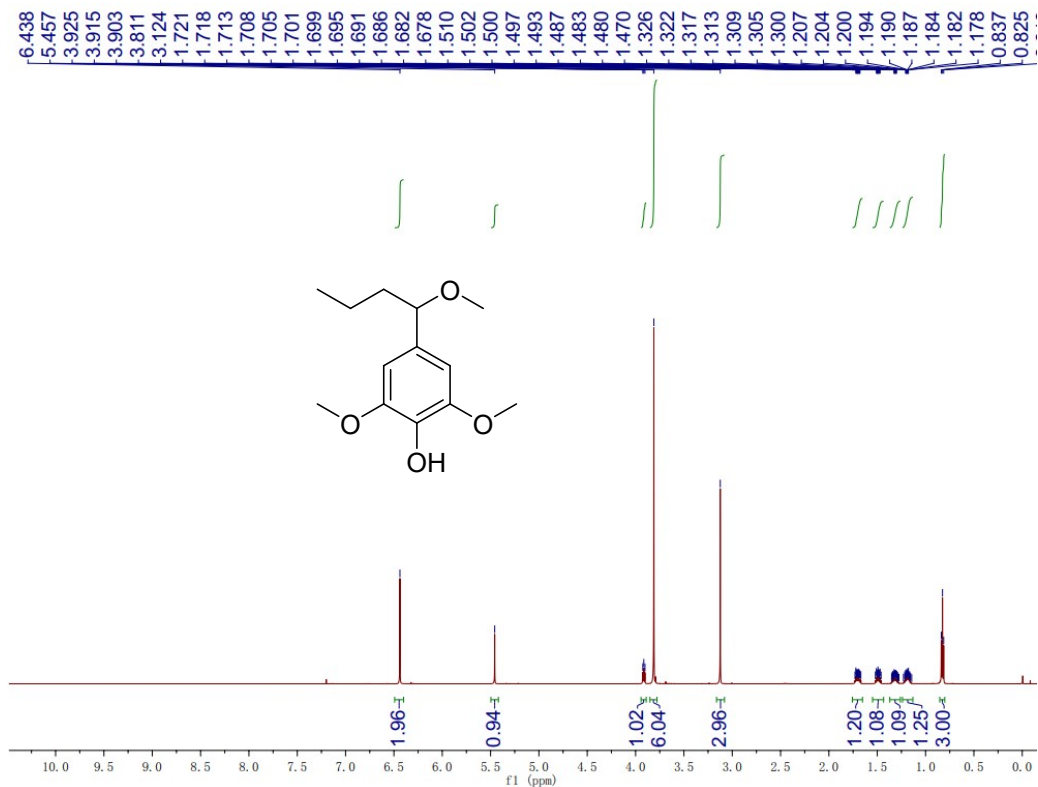

[<sup>13</sup>C\_NMR\_150 MHz\_(CDCl<sub>3</sub>: 77.00 ppm)]

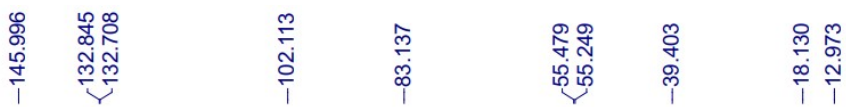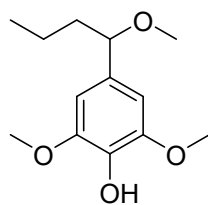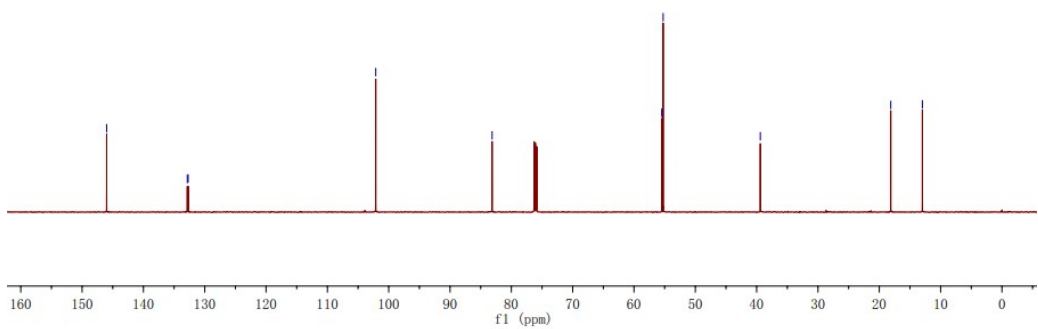

**2,6-Dimethoxy-4-(1-methoxypentyl)phenol (2v)** [<sup>1</sup>H\_NMR\_600 MHz\_(CDCl<sub>3</sub>: 7.26 ppm)]

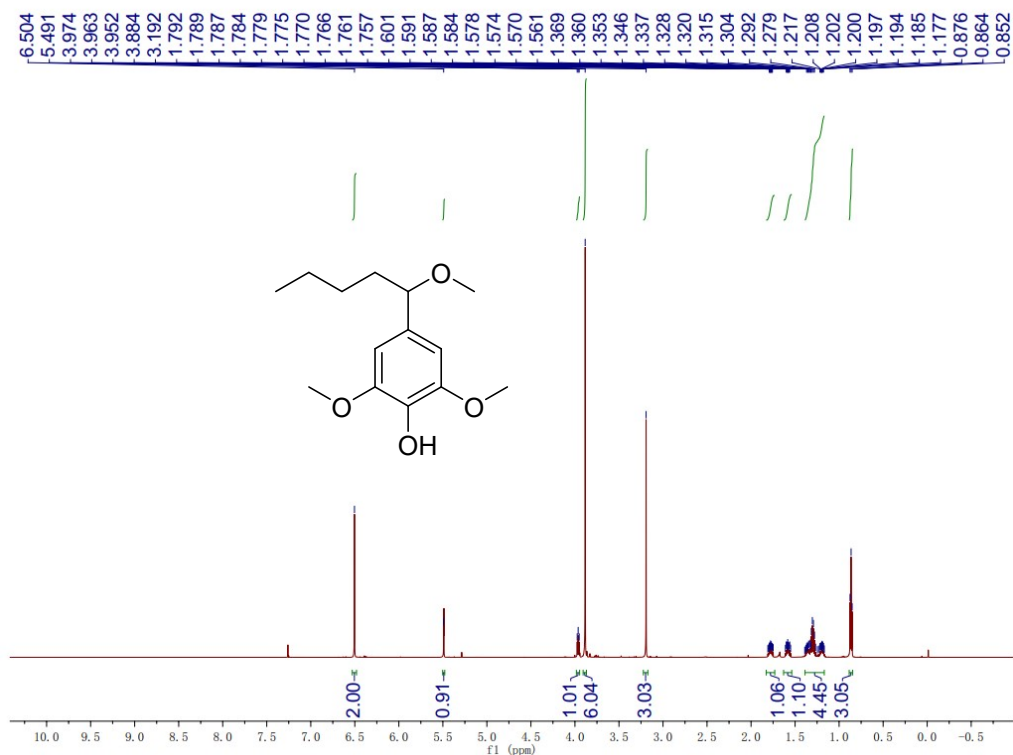

[<sup>13</sup>C\_NMR\_150 MHz\_(CDCl<sub>3</sub>: 77.00 ppm)]

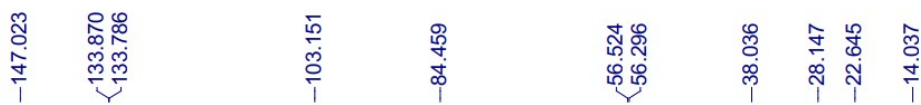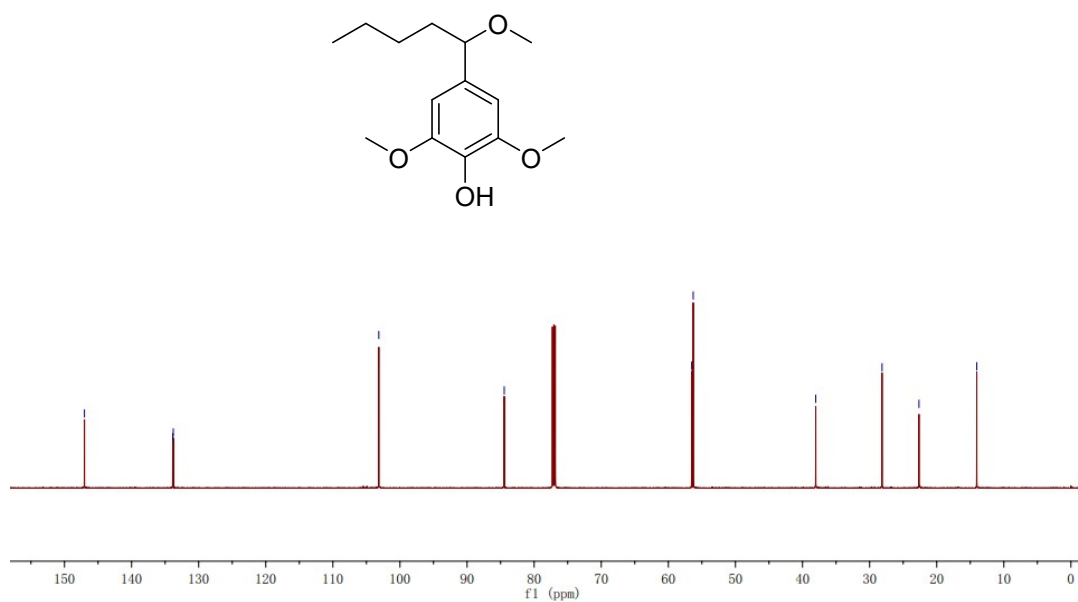

**2,6-Dimethoxy-4-(methoxy(phenyl)methyl)phenol (2w)** [<sup>1</sup>H\_NMR\_600 MHz\_(CDCl<sub>3</sub>: 7.26 ppm)]

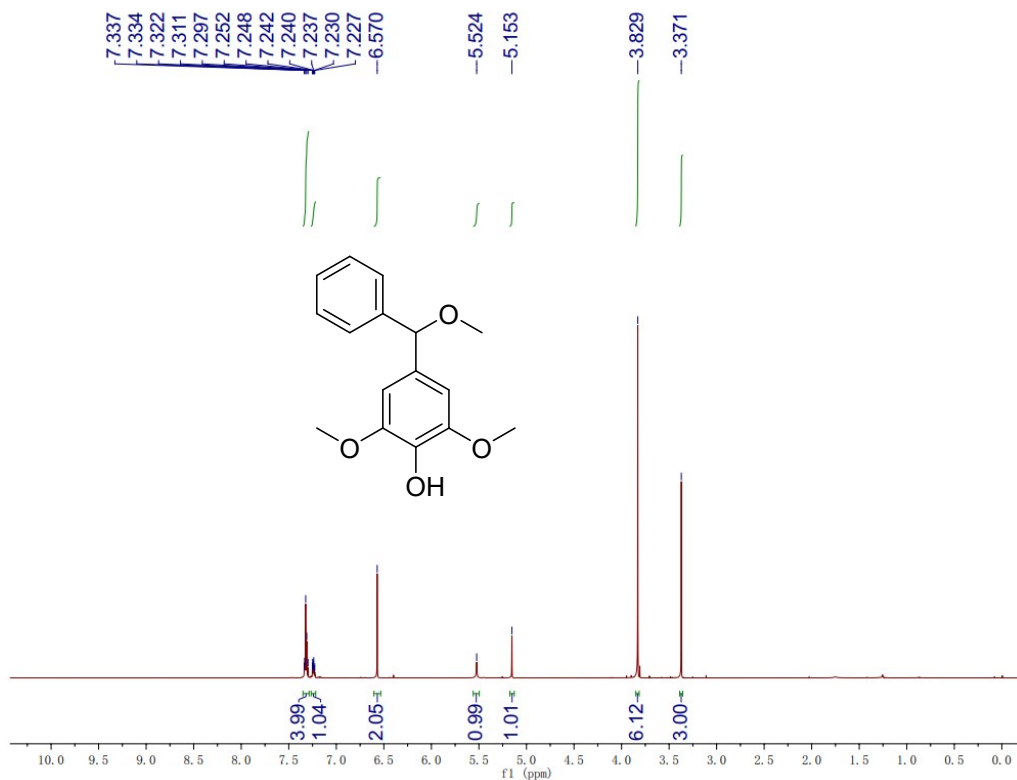

[ $^{13}\text{C NMR}$  150 MHz ( $\text{CDCl}_3$ : 77.00 ppm)]

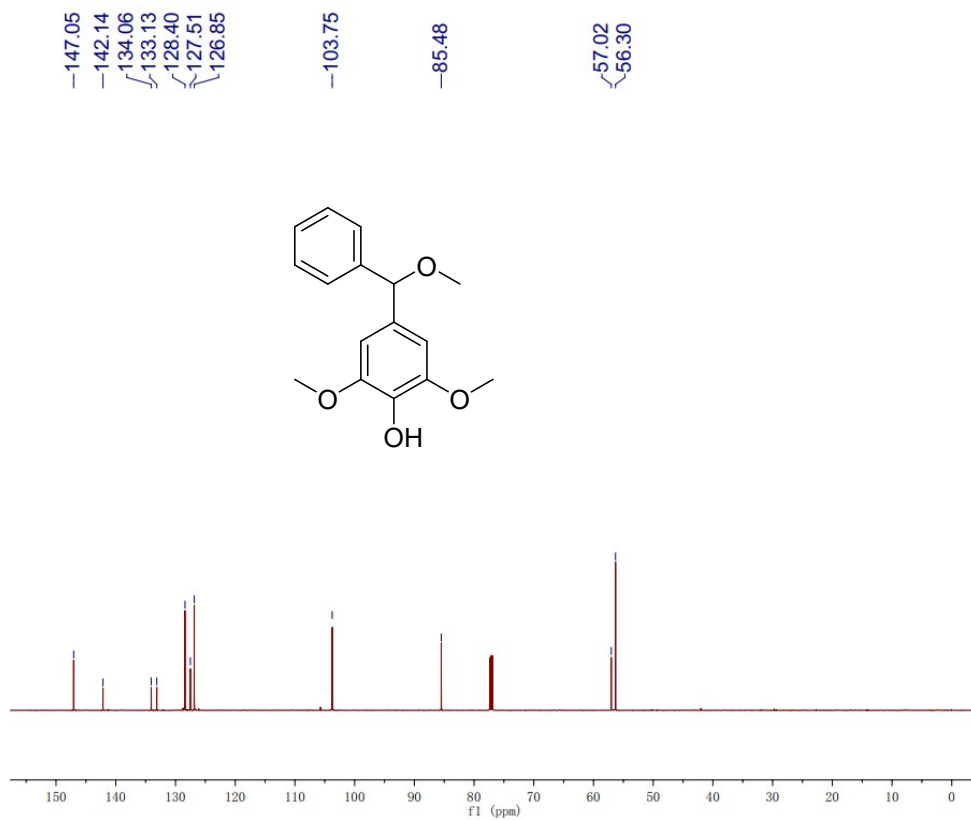

**2,6-Dimethoxy-4-(methoxy(p-tolyl)methyl)phenol (2x)** [ $^1\text{H NMR}$  400 MHz ( $\text{CDCl}_3$ : 7.26 ppm)]

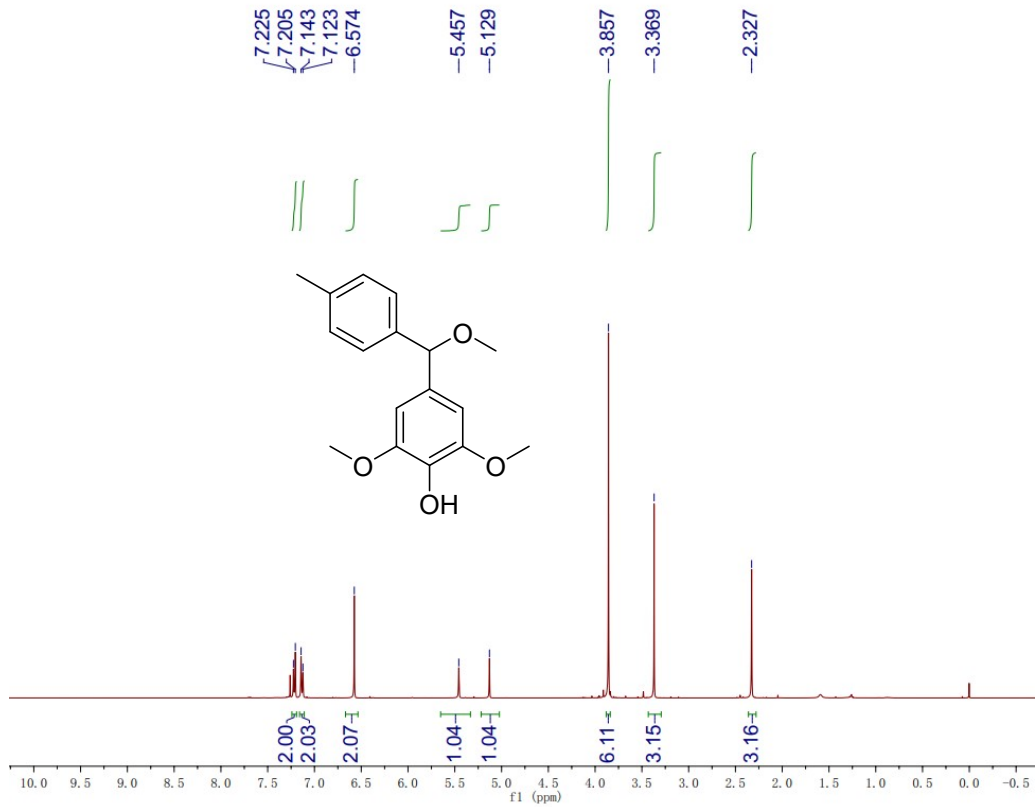

[<sup>13</sup>C\_NMR\_100 MHz\_(CDCl<sub>3</sub>: 77.00 ppm)]

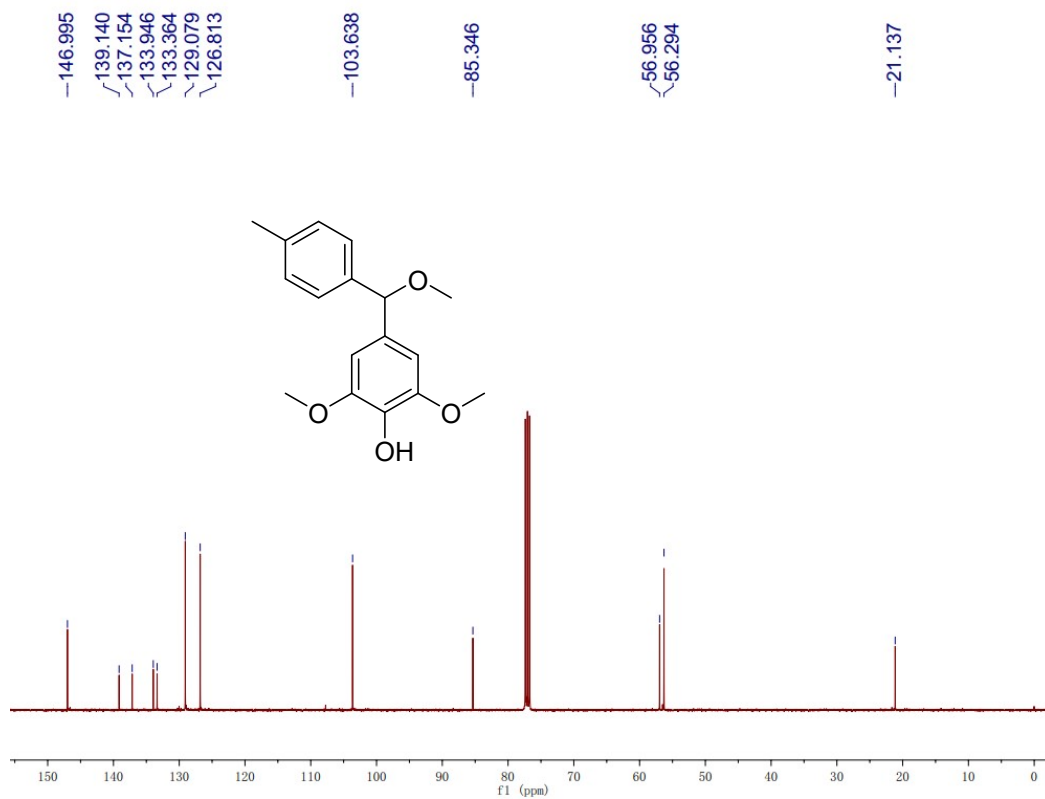

4-((4-Chlorophenyl)(methoxy)methyl)-2,6-dimethoxyphenol (2y) [<sup>1</sup>H\_NMR\_600 MHz\_(CDCl<sub>3</sub>: 7.26 ppm)]

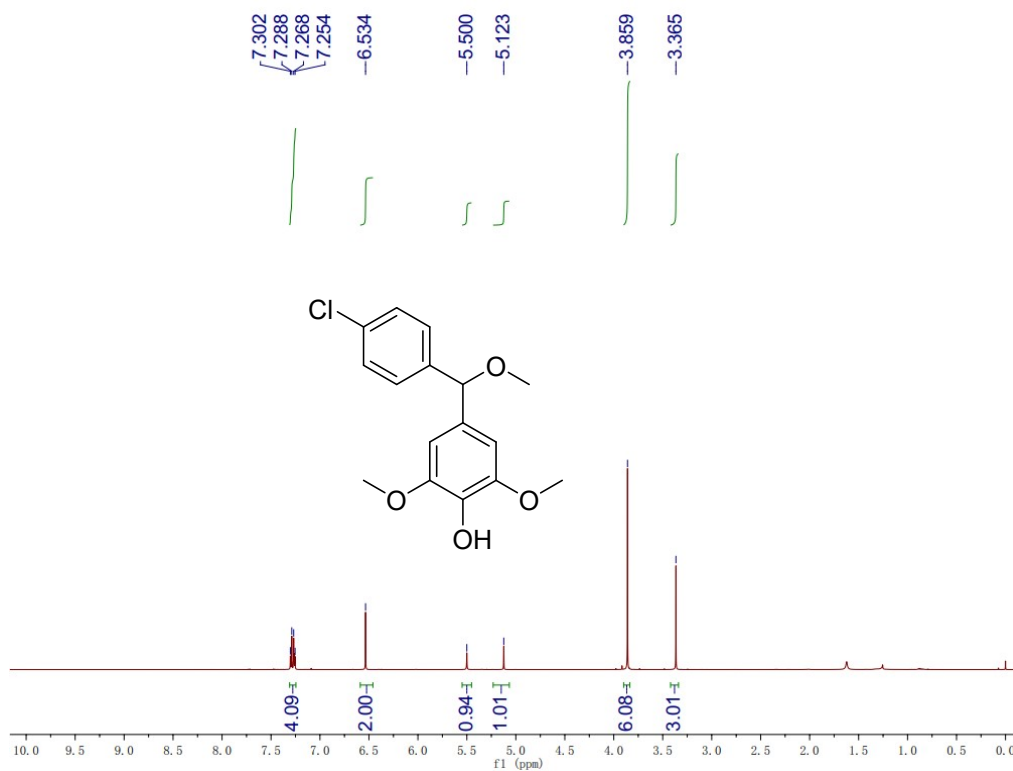

[<sup>13</sup>C\_NMR\_150 MHz\_(CDCl<sub>3</sub>: 77.00 ppm)]

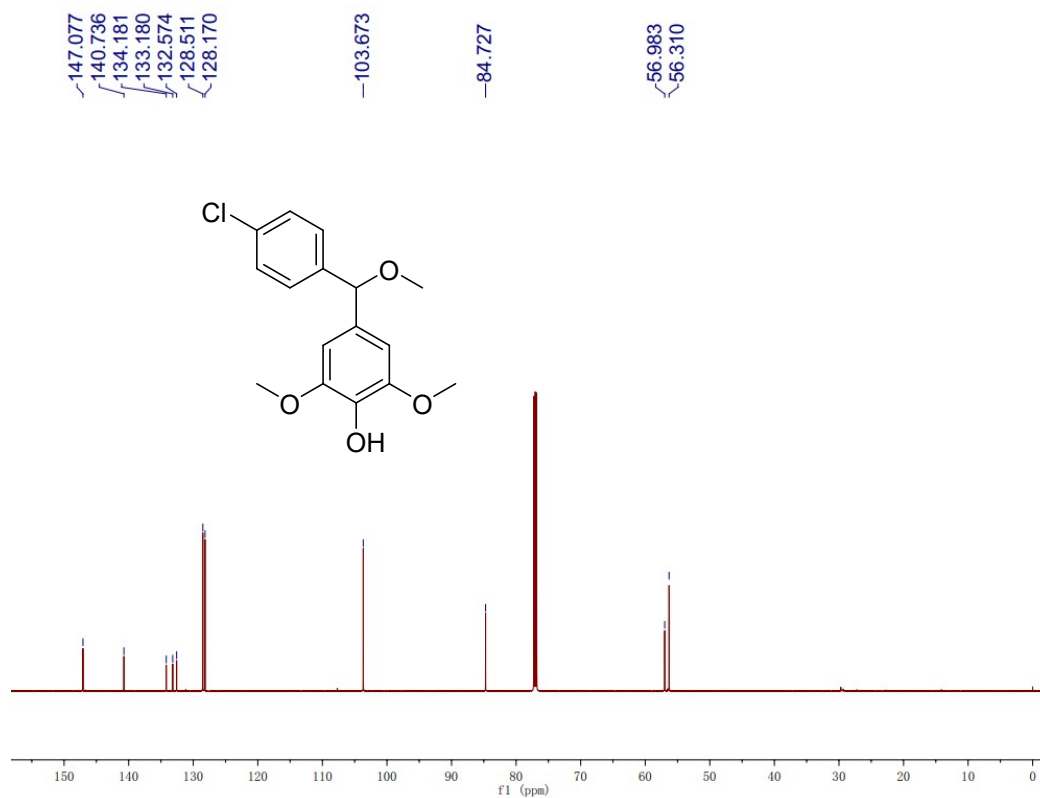

**2,6-Dimethoxy-4-(2-methoxypropan-2-yl)phenol (2z)** [<sup>1</sup>H\_NMR\_600 MHz\_(CDCl<sub>3</sub>: 7.26 ppm)]

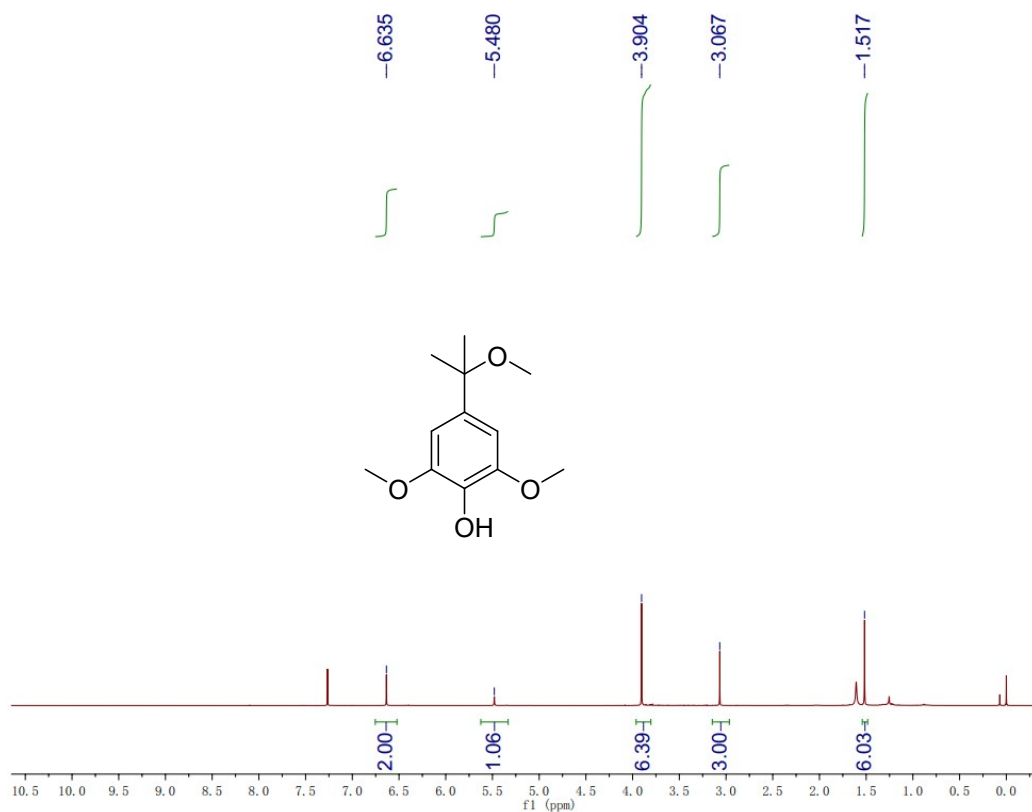

[<sup>13</sup>C\_NMR\_150 MHz\_(CDCl<sub>3</sub>: 77.00 ppm)]

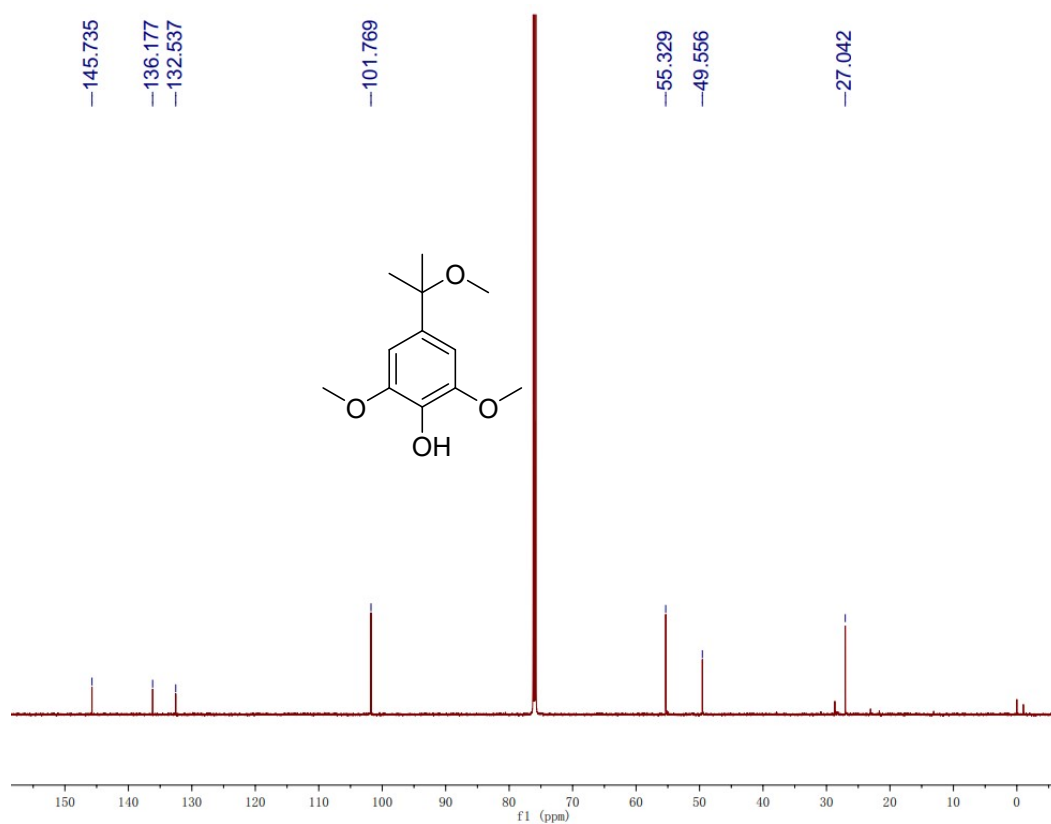

**4-(Ethoxymethyl)-2,6-dimethoxyphenol (3a)** [<sup>1</sup>H\_NMR\_400 MHz\_(CDCl<sub>3</sub>: 7.26 ppm)]



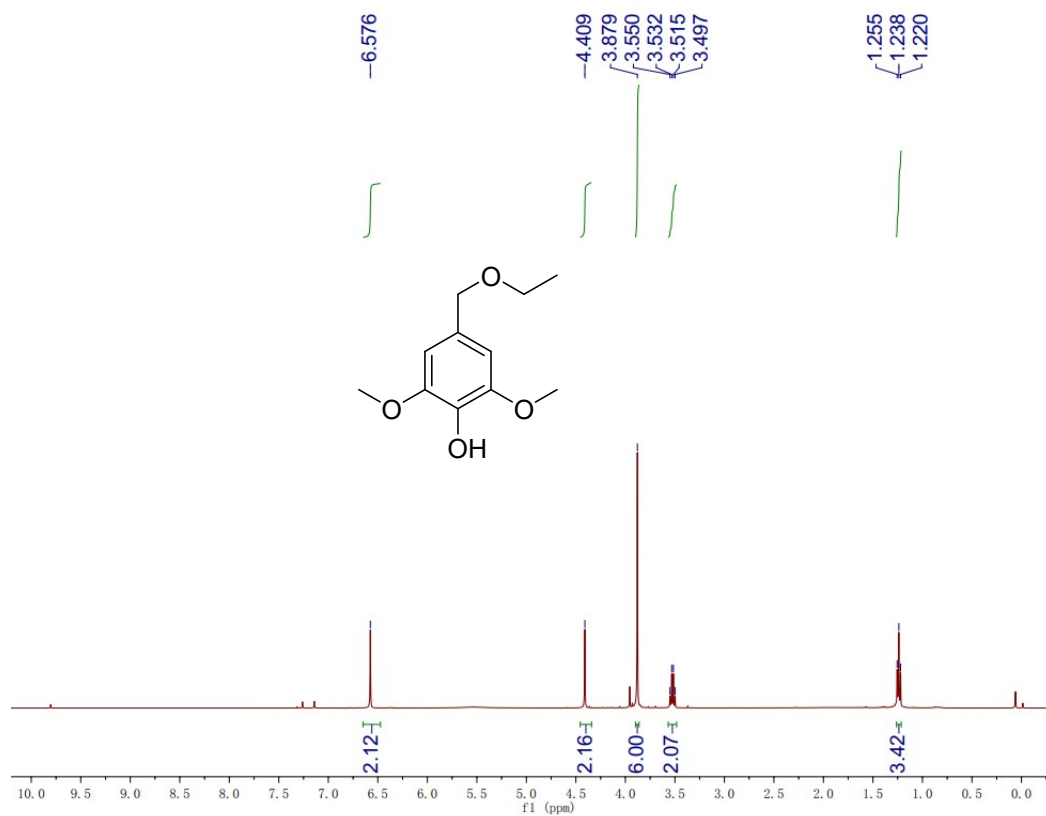

[ $^{13}\text{C}$ \_NMR\_150 MHz\_( $\text{CDCl}_3$ : 77.00 ppm)]

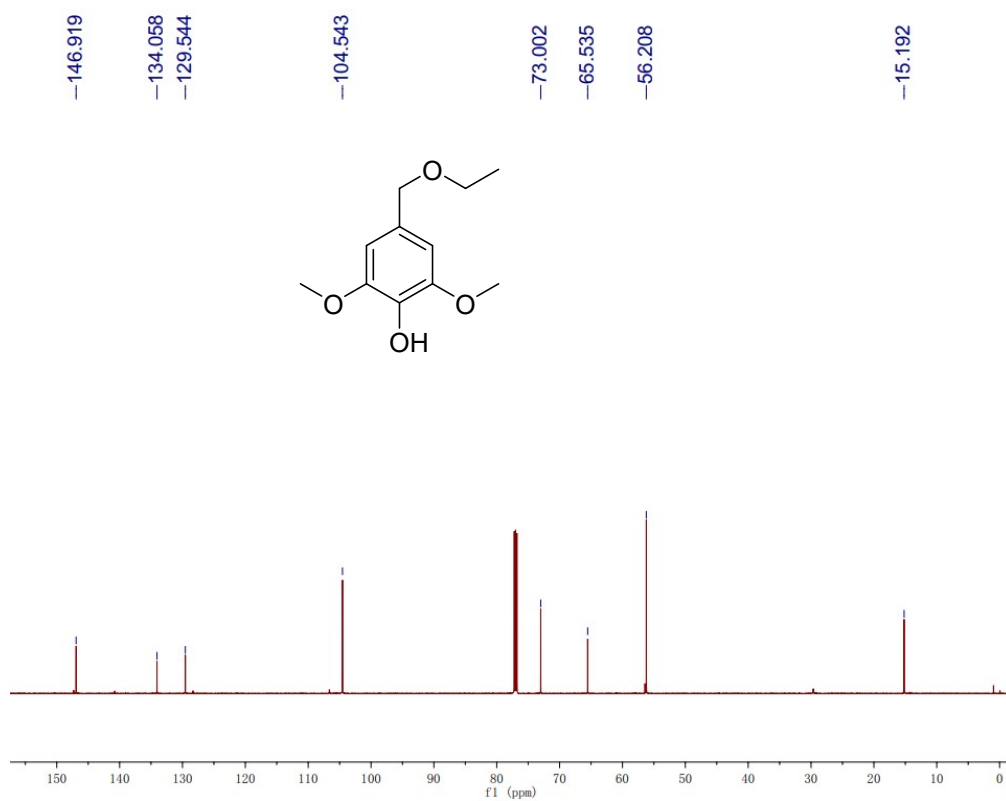

**2,6-Dimethoxy-4-(propoxymethyl)phenol (3b)** [ $^1\text{H}$ \_NMR\_400 MHz\_( $\text{CDCl}_3$ : 7.26 ppm)]

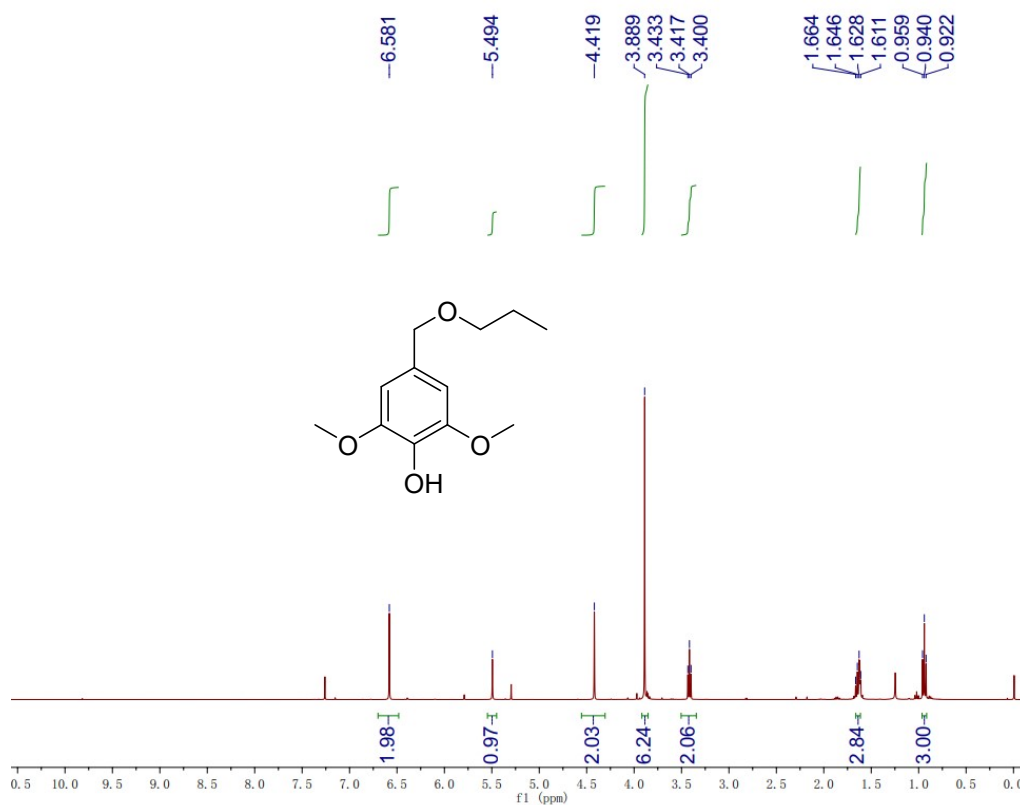

[ $^{13}\text{C}$ \_NMR\_150 MHz\_( $\text{CDCl}_3$ : 77.00 ppm)]

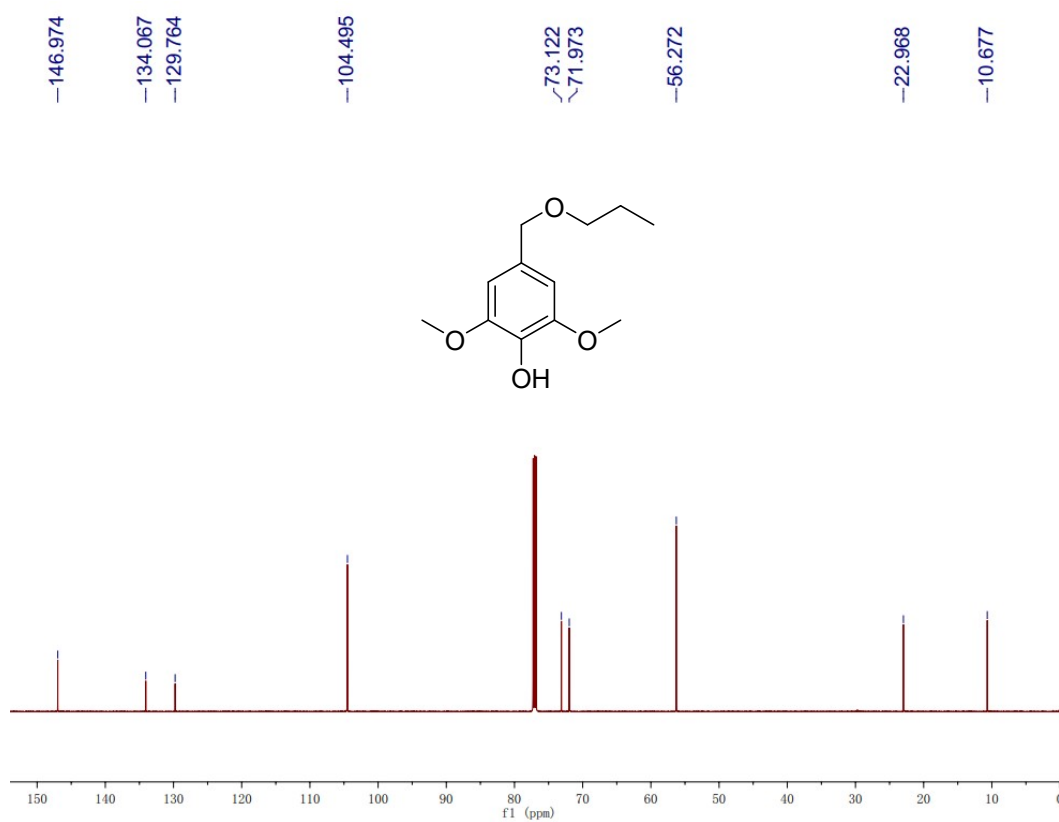

**4-(Butoxymethyl)-2,6-dimethoxyphenol (3c)** [ $^1\text{H}$ \_NMR\_400 MHz\_( $\text{CDCl}_3$ : 7.26 ppm)]

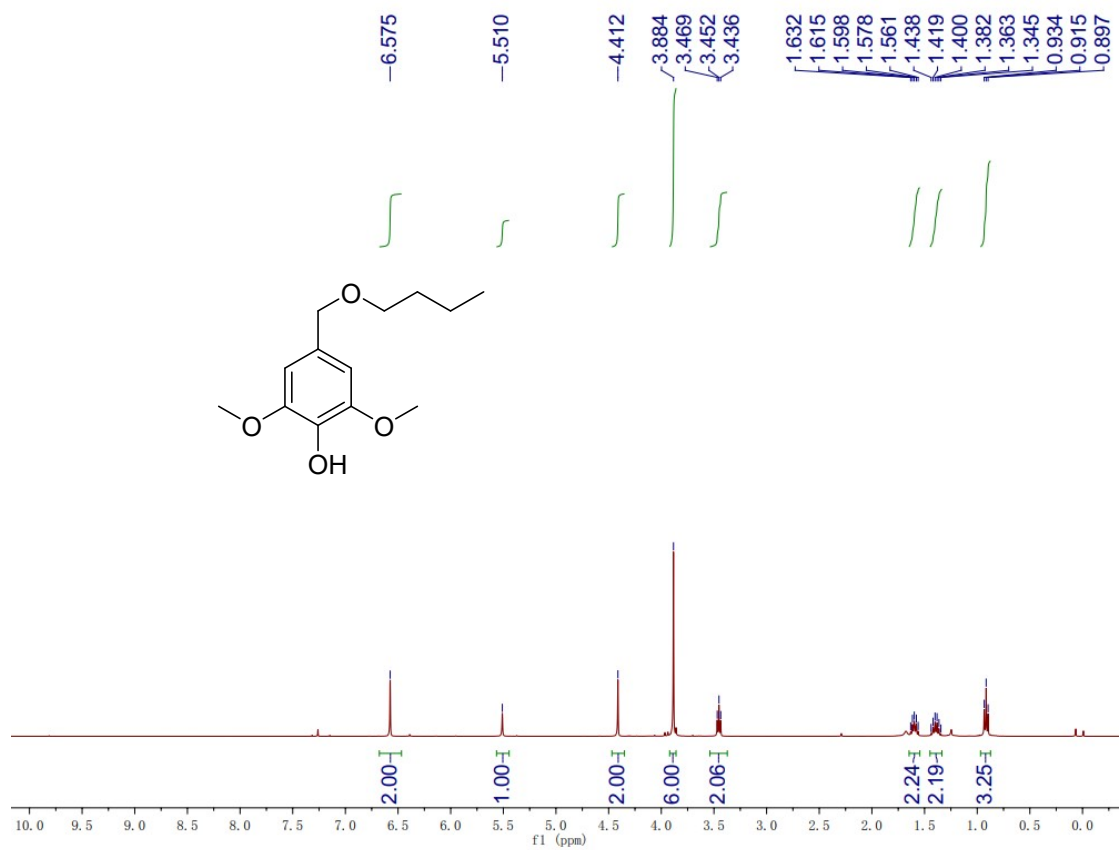

[<sup>13</sup>C\_NMR\_150 MHz\_(CDCl<sub>3</sub>: 77.00 ppm)]

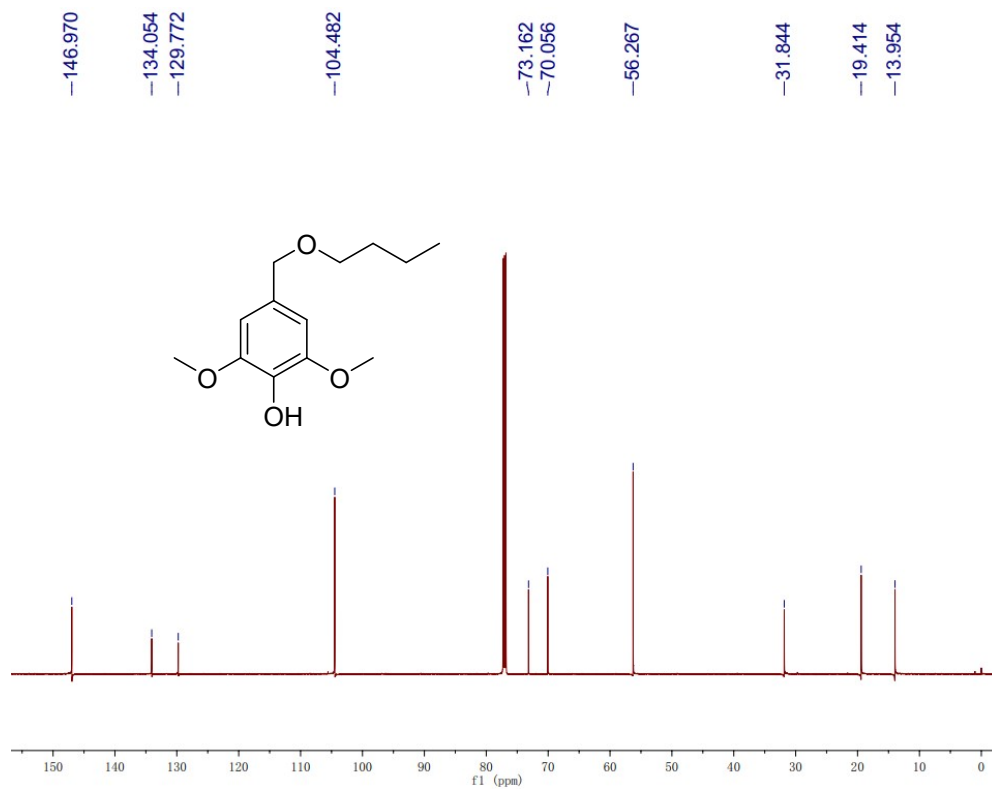

**4-(Isobutoxymethyl)-2,6-dimethoxyphenol (3d)** [<sup>1</sup>H\_NMR\_400 MHz\_(CDCl<sub>3</sub>: 7.26 ppm)]

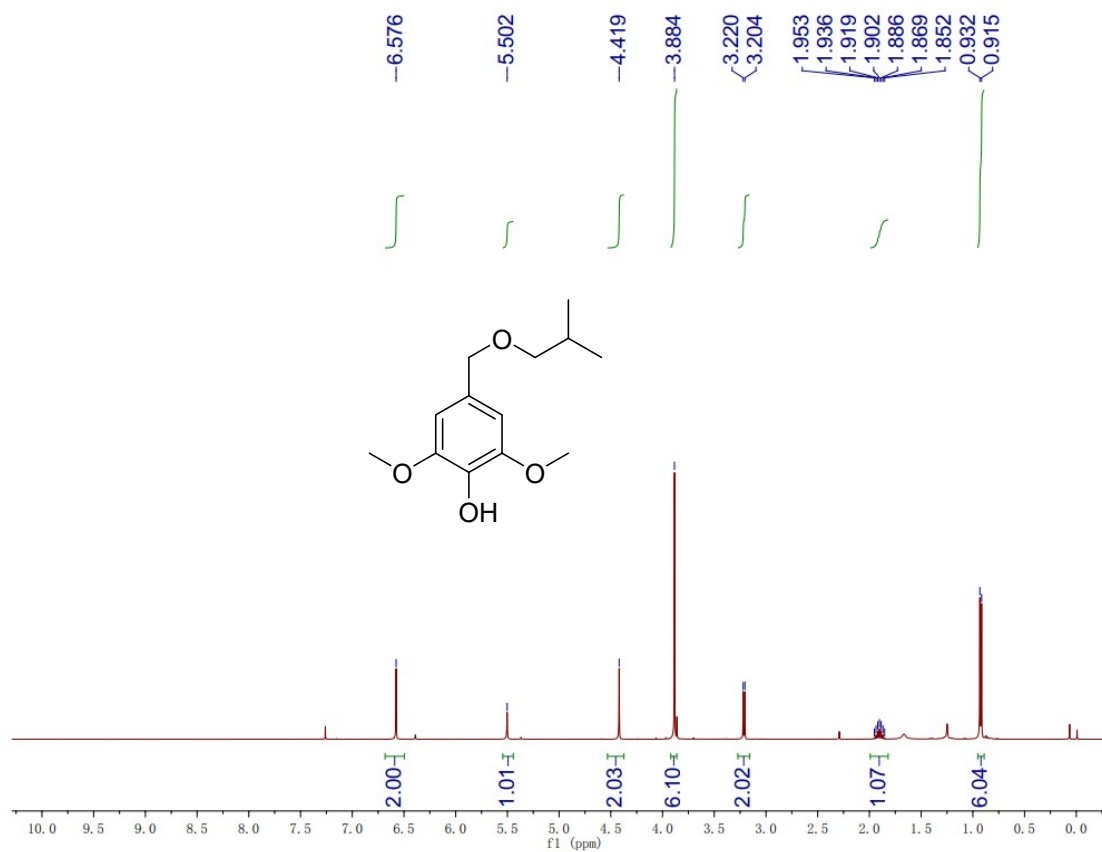

[<sup>13</sup>C\_NMR\_150 MHz\_(CDCl<sub>3</sub>: 77.00 ppm)]

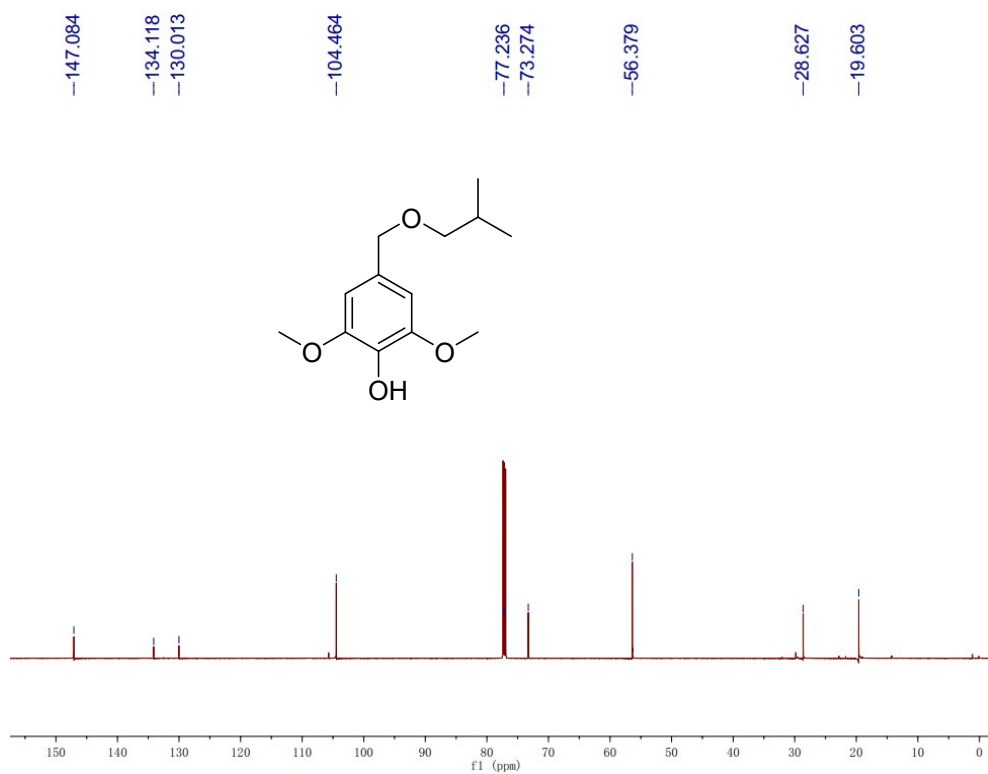

**4-((Cyclopropylmethoxy)methyl)-2,6-dimethoxyphenol (3e)** [<sup>1</sup>H\_NMR\_400 MHz\_(CDCl<sub>3</sub>: 7.26 ppm)]

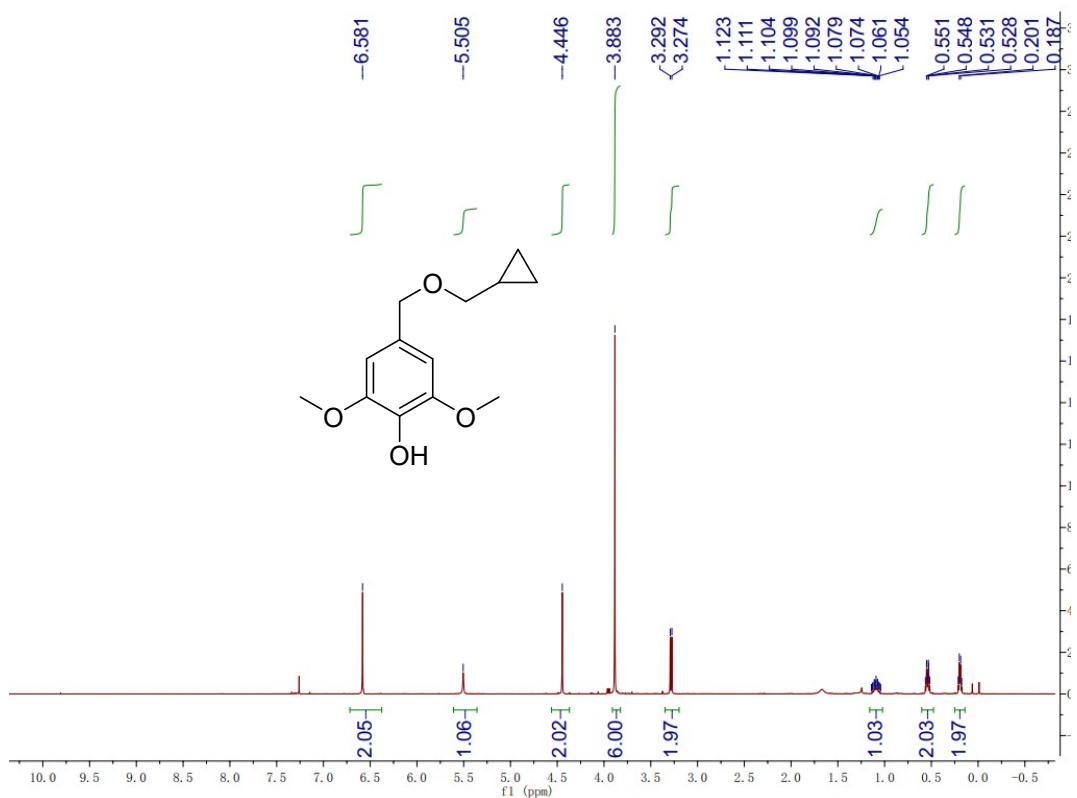

[<sup>13</sup>C\_NMR\_150 MHz\_(CDCl<sub>3</sub>: 77.00 ppm)]

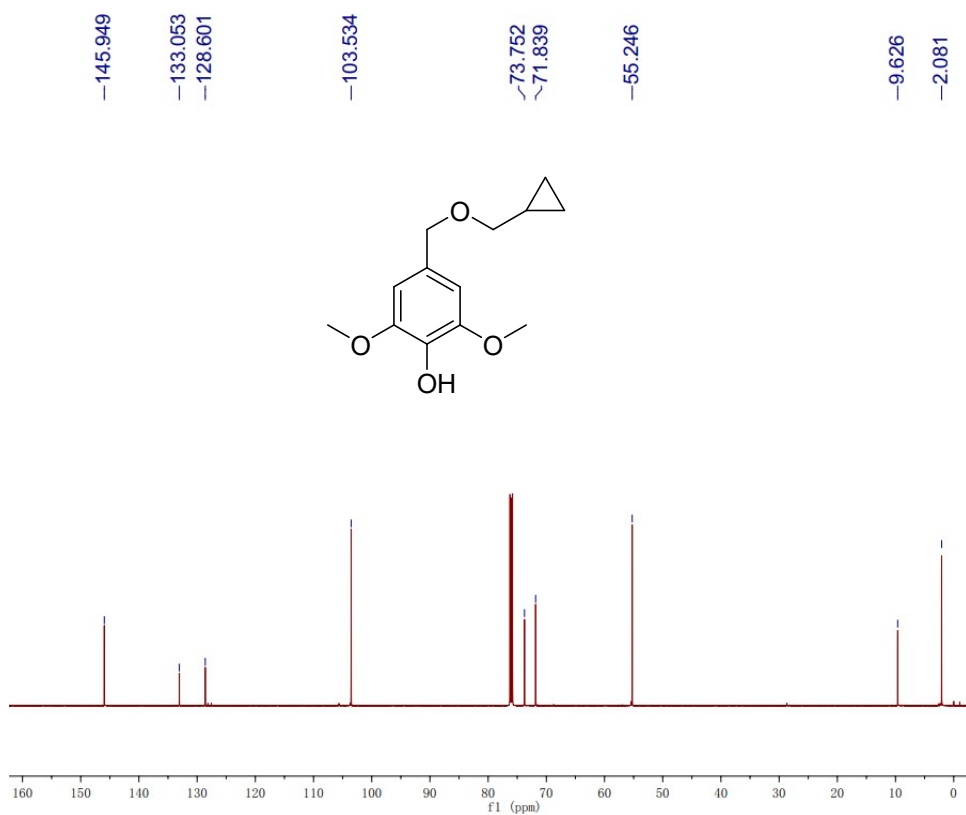

**2,6-Dimethoxy-4-((2-methoxyethoxy)methyl)phenol (3f)** [<sup>1</sup>H\_NMR\_400 MHz\_(CDCl<sub>3</sub>: 7.26 ppm)]

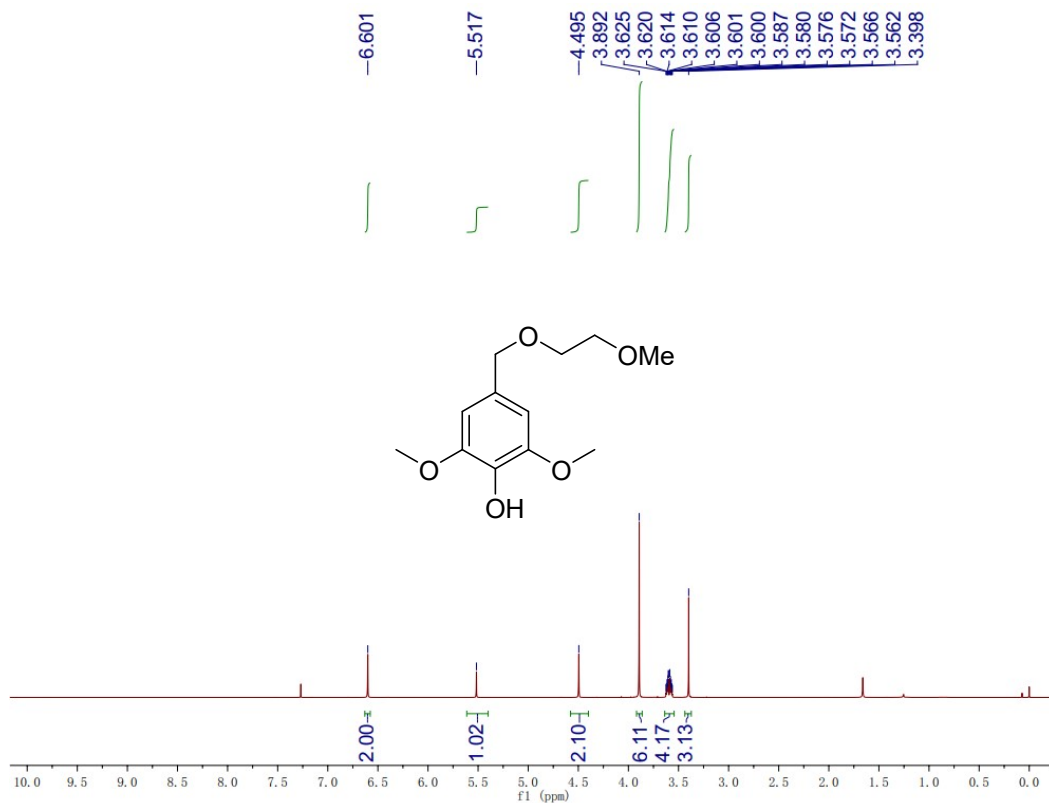

[<sup>13</sup>C\_NMR\_150 MHz\_(CDCl<sub>3</sub>: 77.00 ppm)]

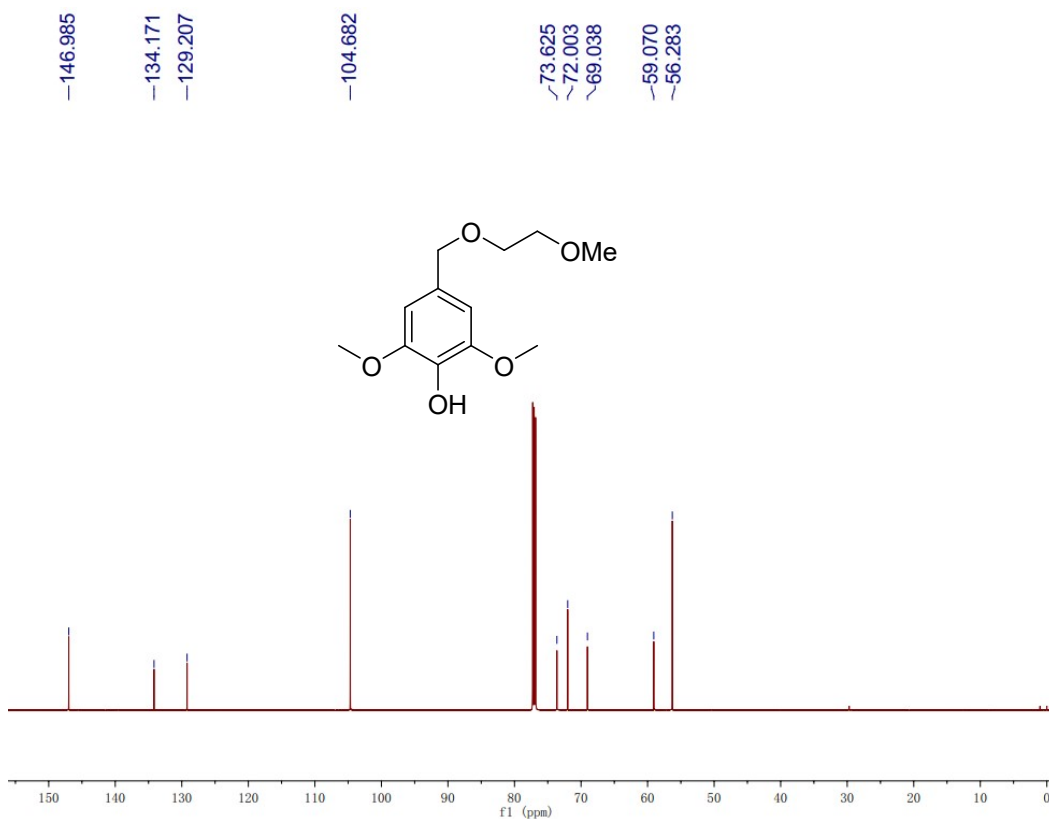

**4-((But-3-en-1-yloxy)methyl)-2,6-dimethoxyphenol (3g)** [<sup>1</sup>H\_NMR\_400 MHz\_(CDCl<sub>3</sub>: 7.26 ppm)]

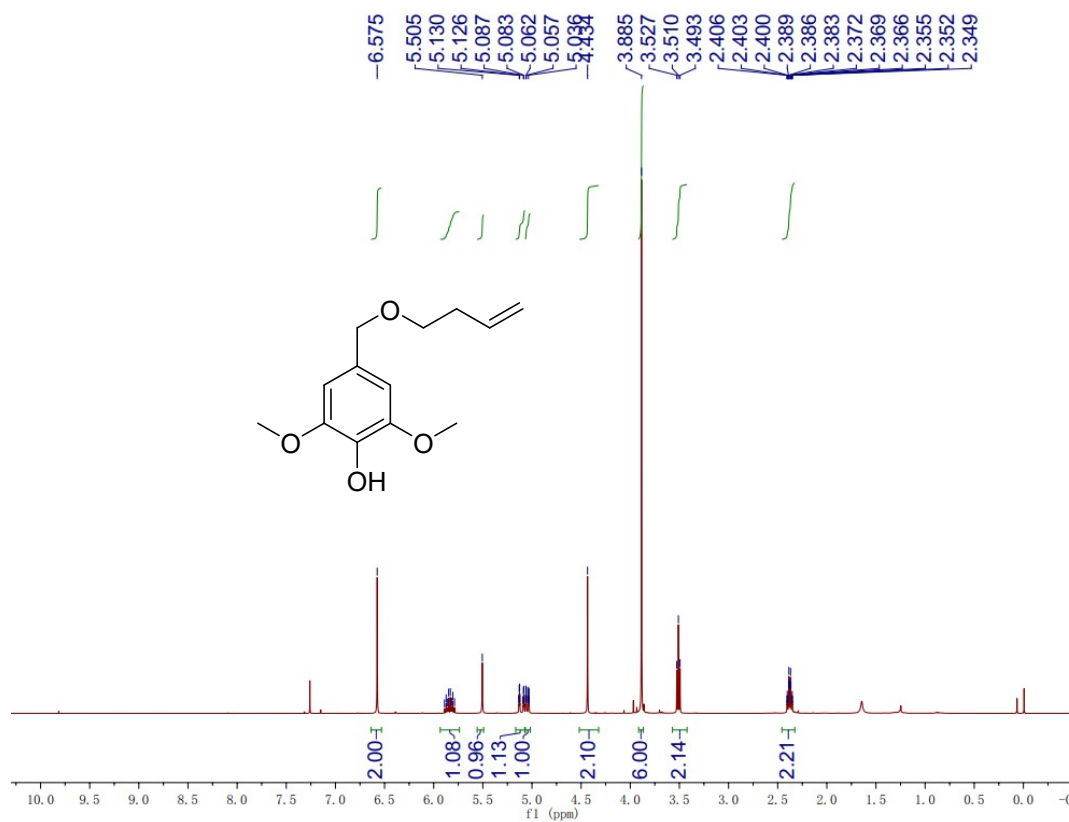

[<sup>13</sup>C\_NMR\_150 MHz\_(CDCl<sub>3</sub>: 77.00 ppm)]

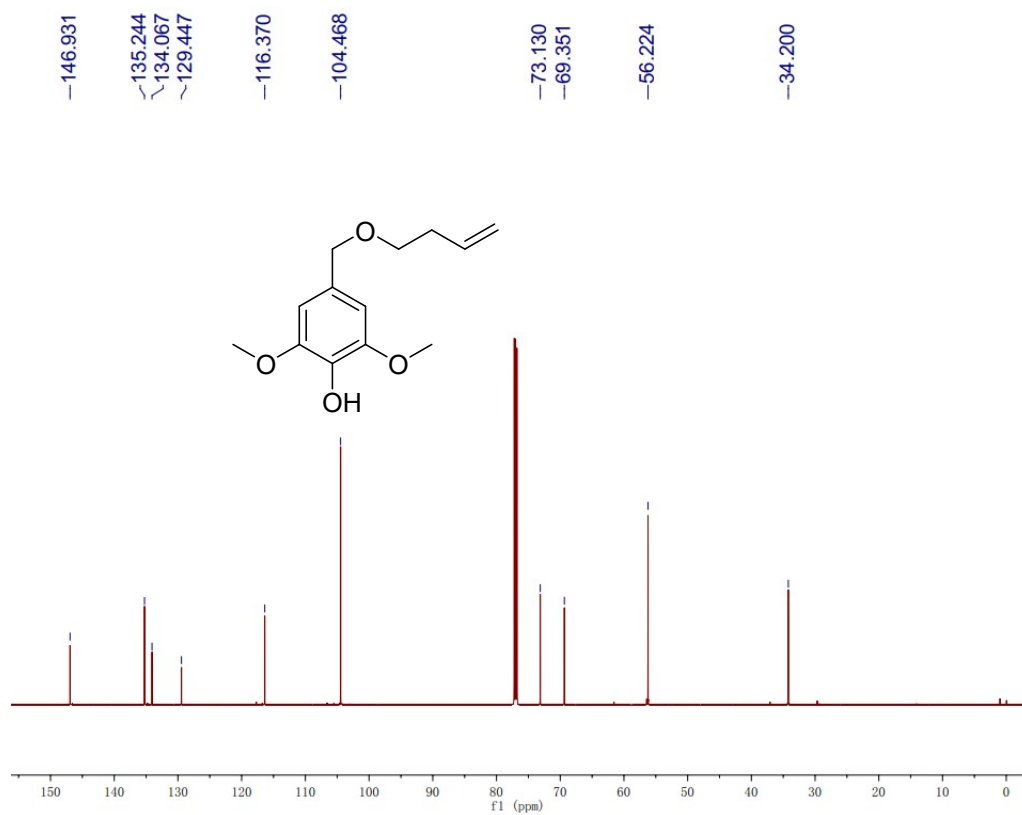

**2,6-Dimethoxy-4-((pent-3-yn-1-yloxy)methyl)phenol (3h)** [<sup>1</sup>H\_NMR\_400 MHz\_(CDCl<sub>3</sub>: 7.26 ppm)]

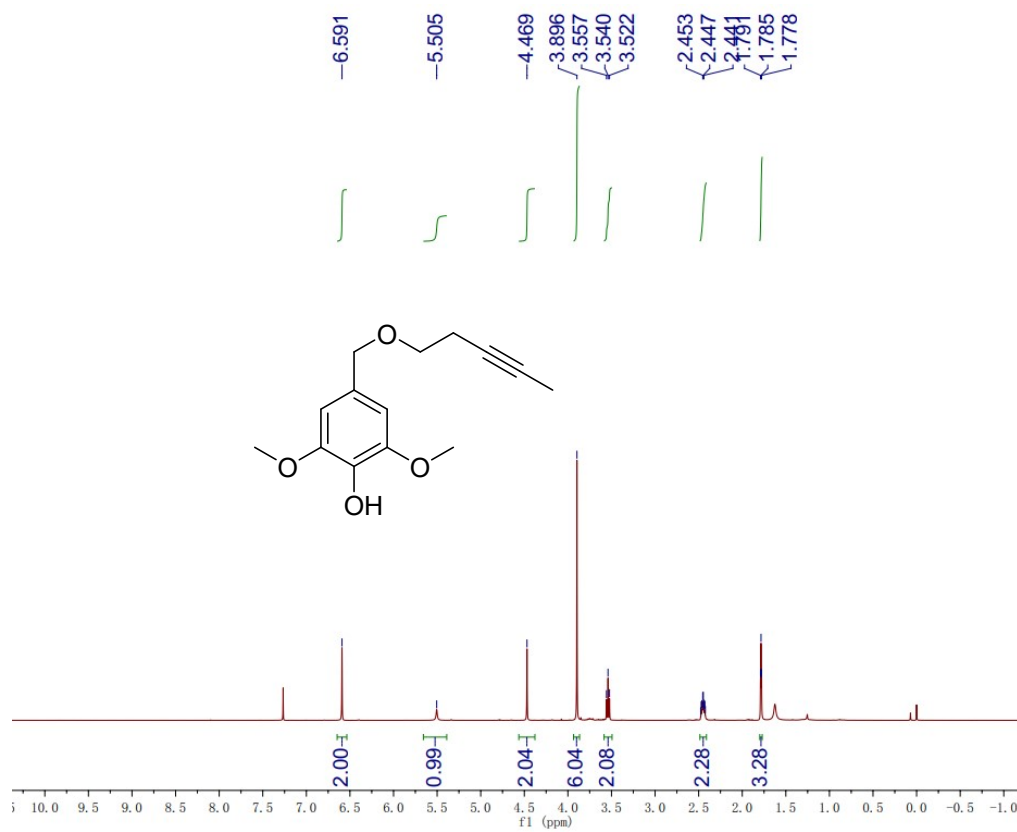

[<sup>13</sup>C\_NMR\_150 MHz\_(CDCl<sub>3</sub>: 77.00 ppm)]

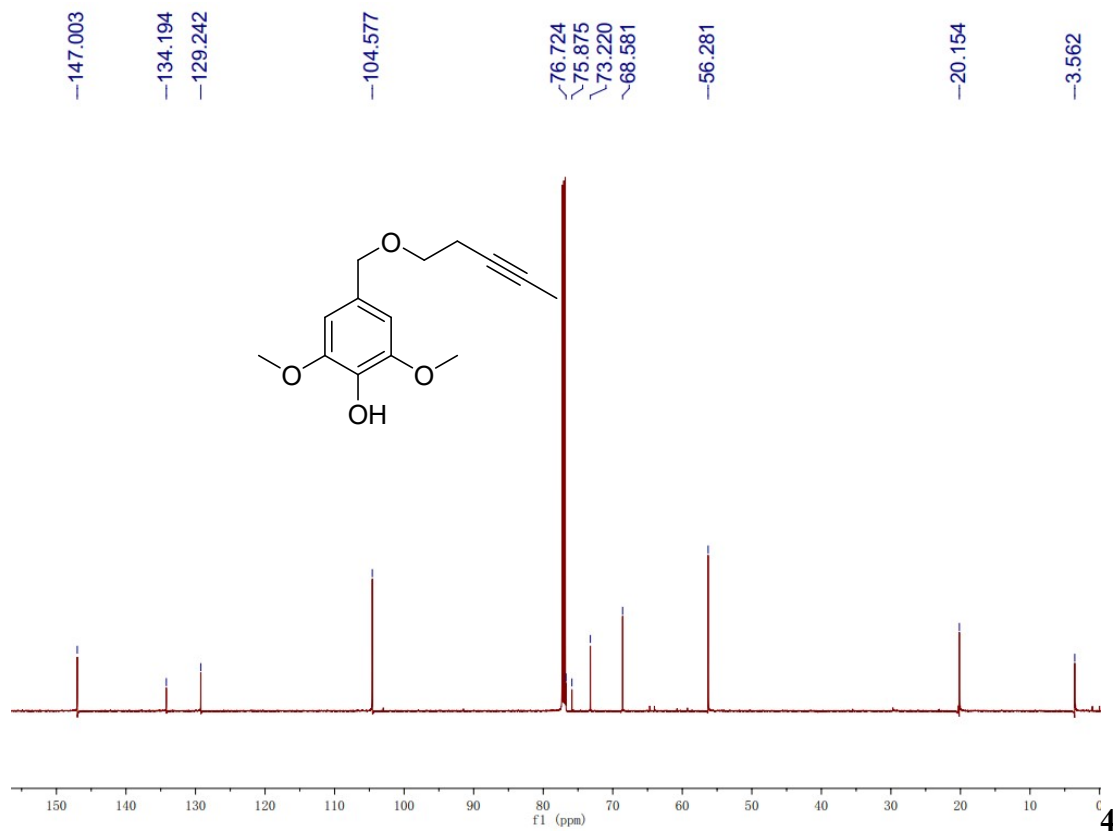

-((Benzyloxy)methyl)-2,6-dimethoxyphenol (3i) [<sup>1</sup>H\_NMR\_400 MHz\_(CDCl<sub>3</sub>: 7.26



ppm)]

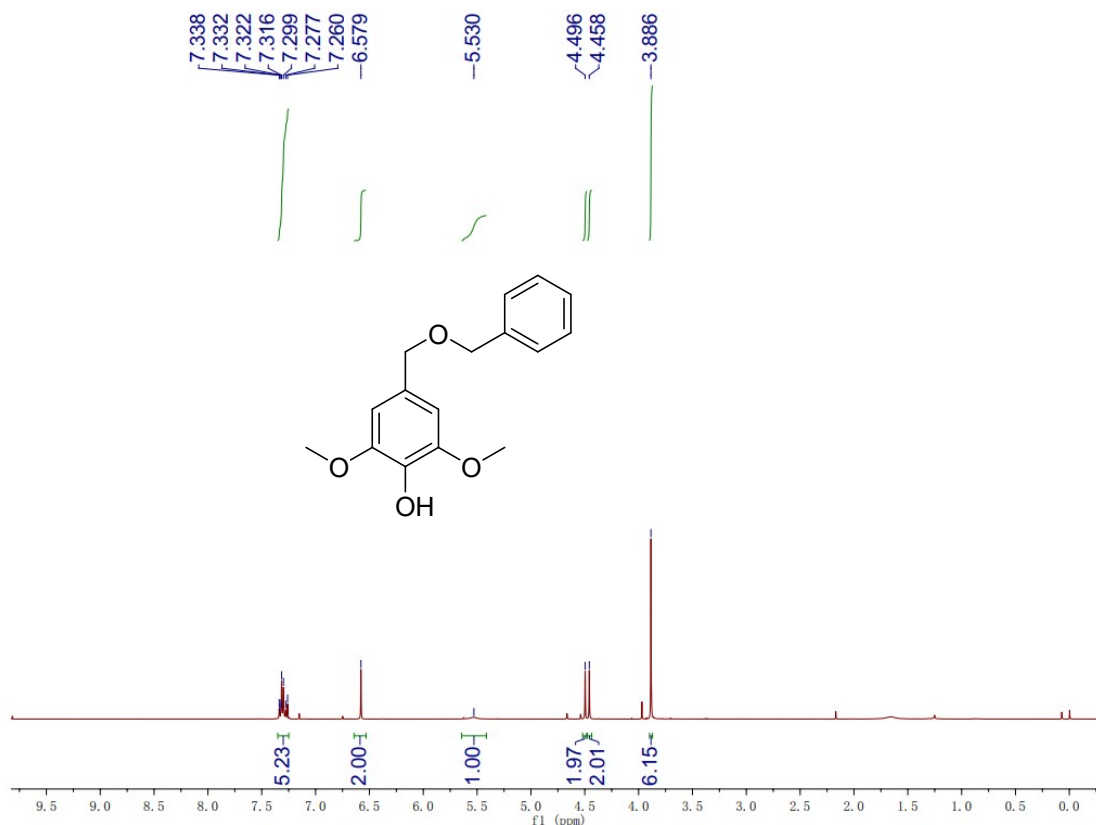

[<sup>13</sup>C\_NMR\_150 MHz\_(CDCl<sub>3</sub>: 77.00 ppm)]

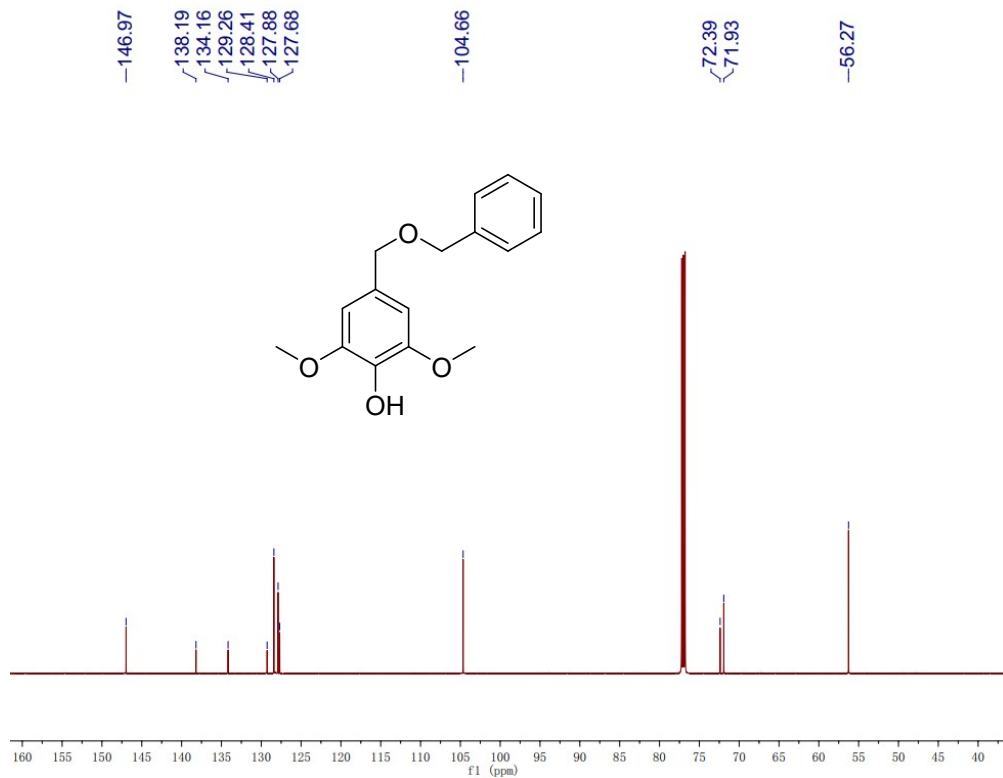

**2,6-Dimethoxy-4-(phenoxymethyl)phenol (3j)** [<sup>1</sup>H\_NMR\_400 MHz\_(CDCl<sub>3</sub>:  
7.26 ppm)]

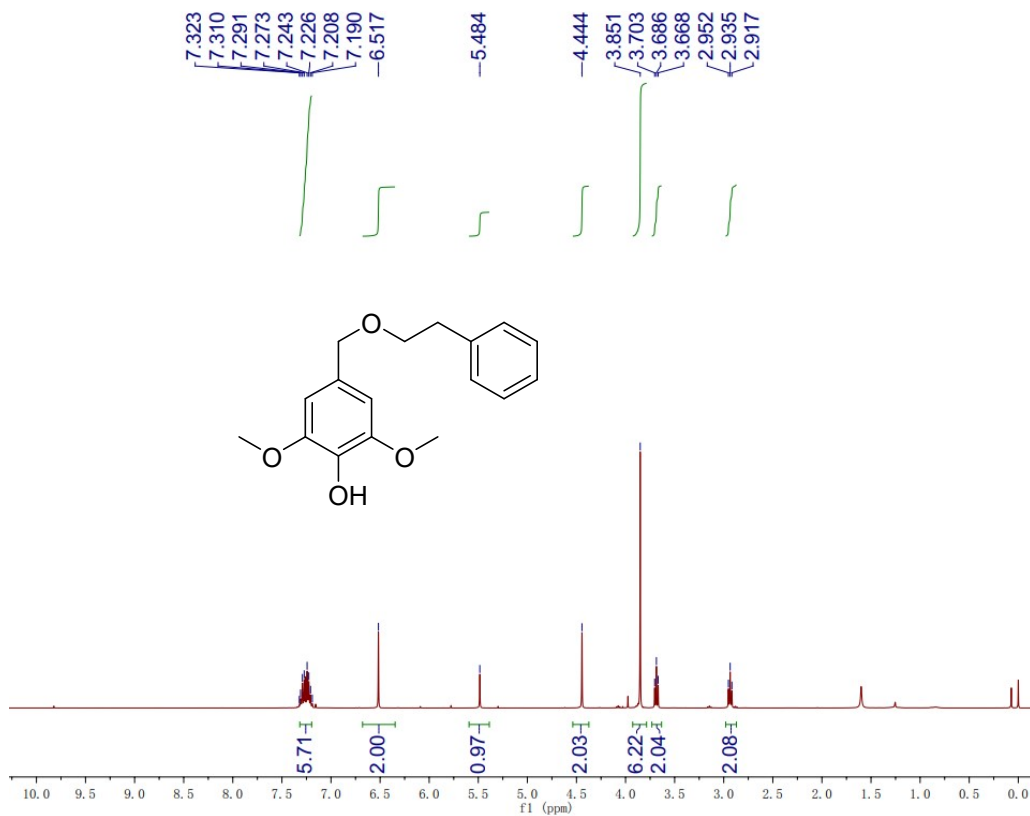

[<sup>13</sup>C\_NMR\_150 MHz\_(CDCl<sub>3</sub>: 77.00 ppm)]

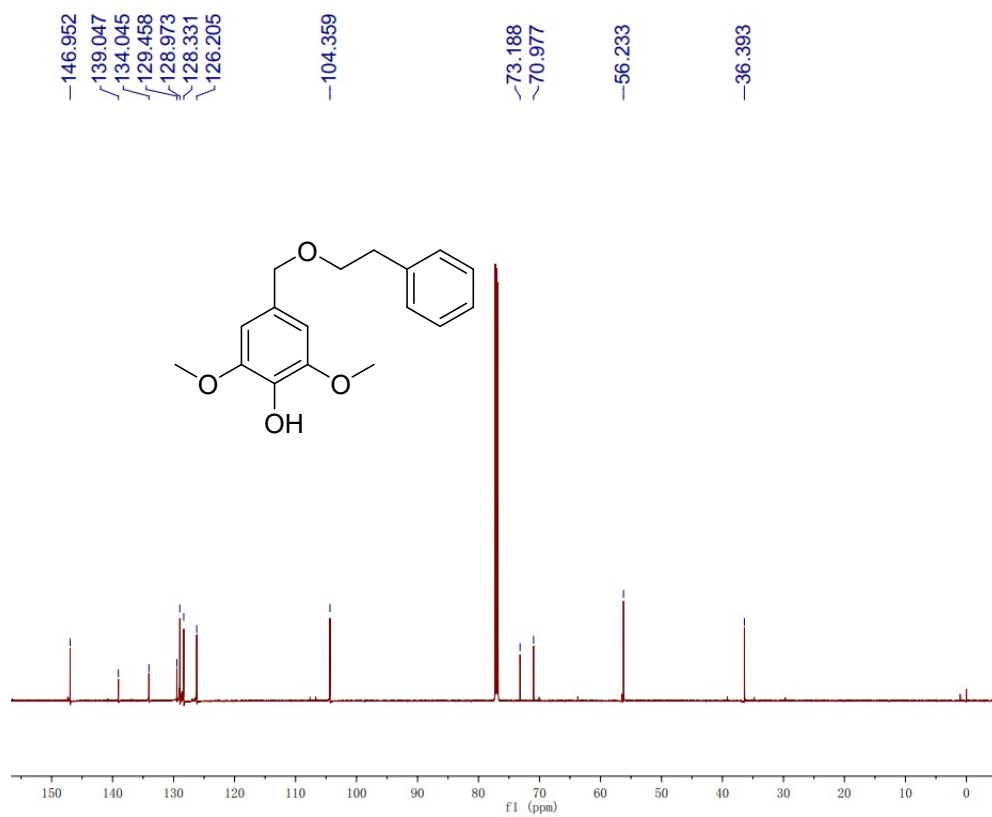

**2,6-Dimethoxy-4-((3-(p-tolyl)propoxy)methyl)phenol (3k)** [<sup>1</sup>H\_NMR\_400 MHz\_(CDCl<sub>3</sub>: 7.26 ppm)]

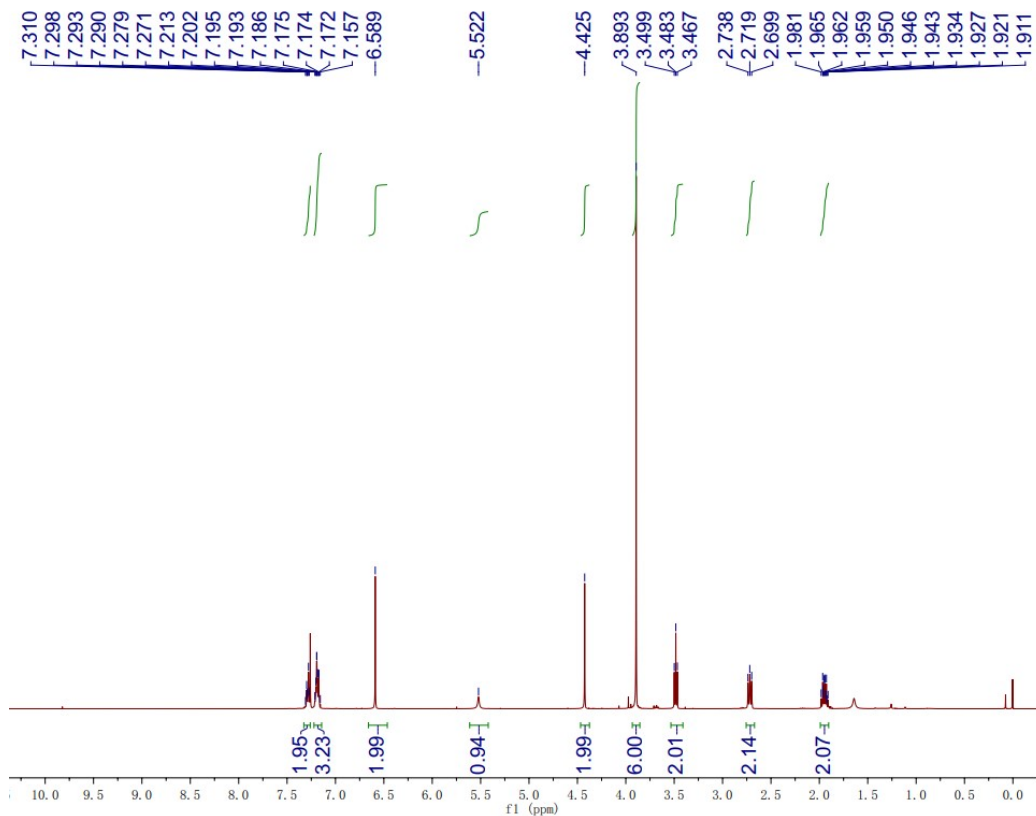

[<sup>13</sup>C\_NMR\_150 MHz\_(CDCl<sub>3</sub>: 77.00 ppm)]

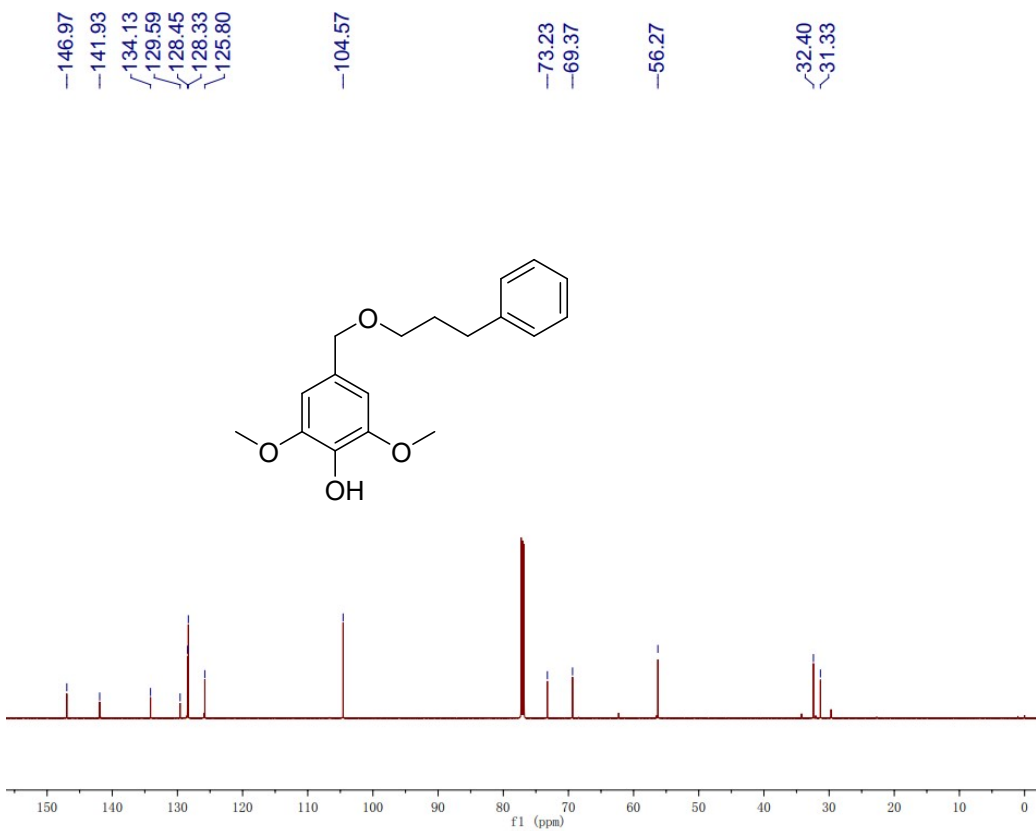

**2,6-Dimethoxy-4-((4-methoxybenzyl)oxy)methylphenol (31)** [<sup>1</sup>H\_NMR\_400 MHz\_(CDCl<sub>3</sub>: 7.26 ppm)]

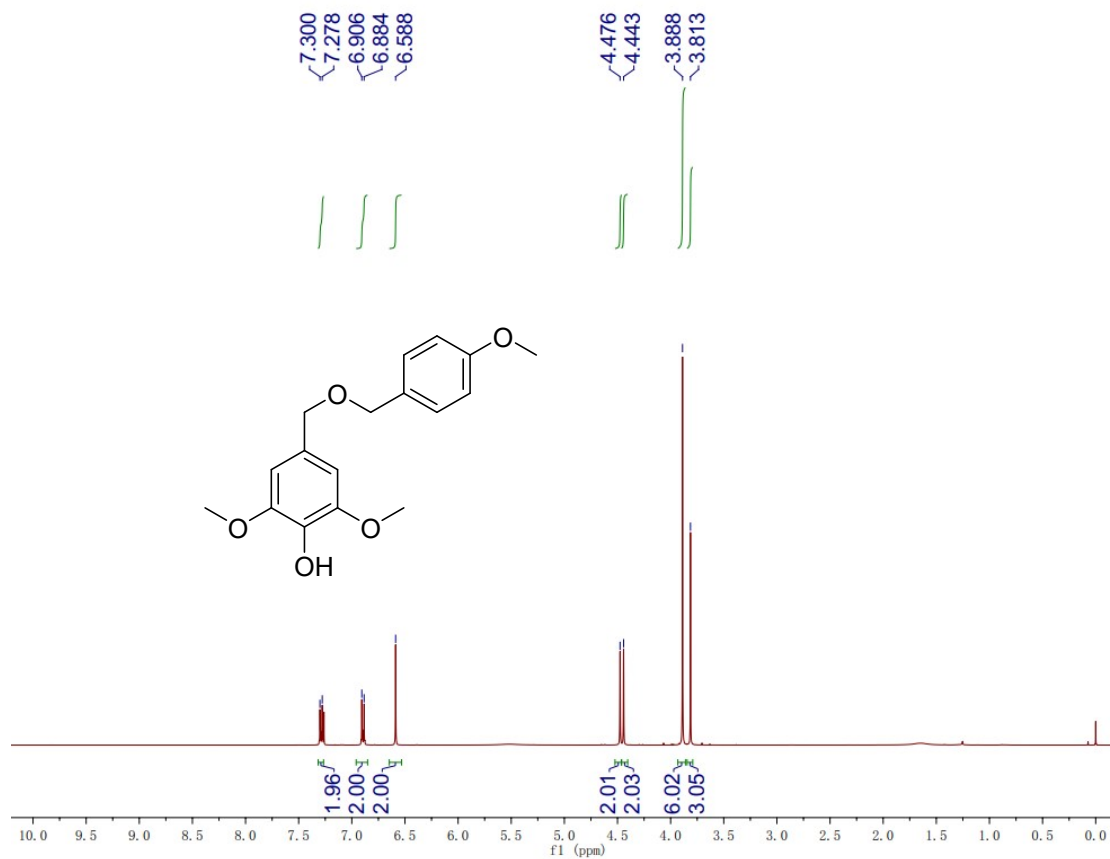

[<sup>13</sup>C\_NMR\_150 MHz\_(CDCl<sub>3</sub>: 77.00 ppm)]

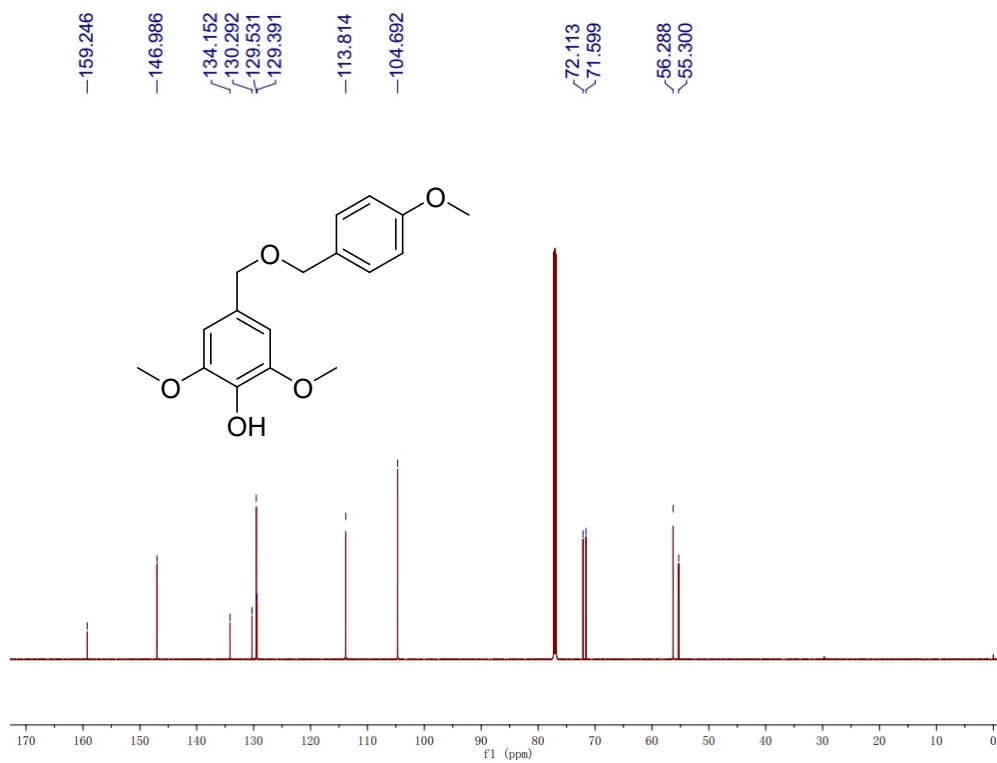

**4-(((4-Chlorobenzyl)oxy)methyl)-2,6-dimethoxyphenol (3m)** [<sup>1</sup>H\_NMR\_400 MHz\_(CDCl<sub>3</sub>: 7.26 ppm)]

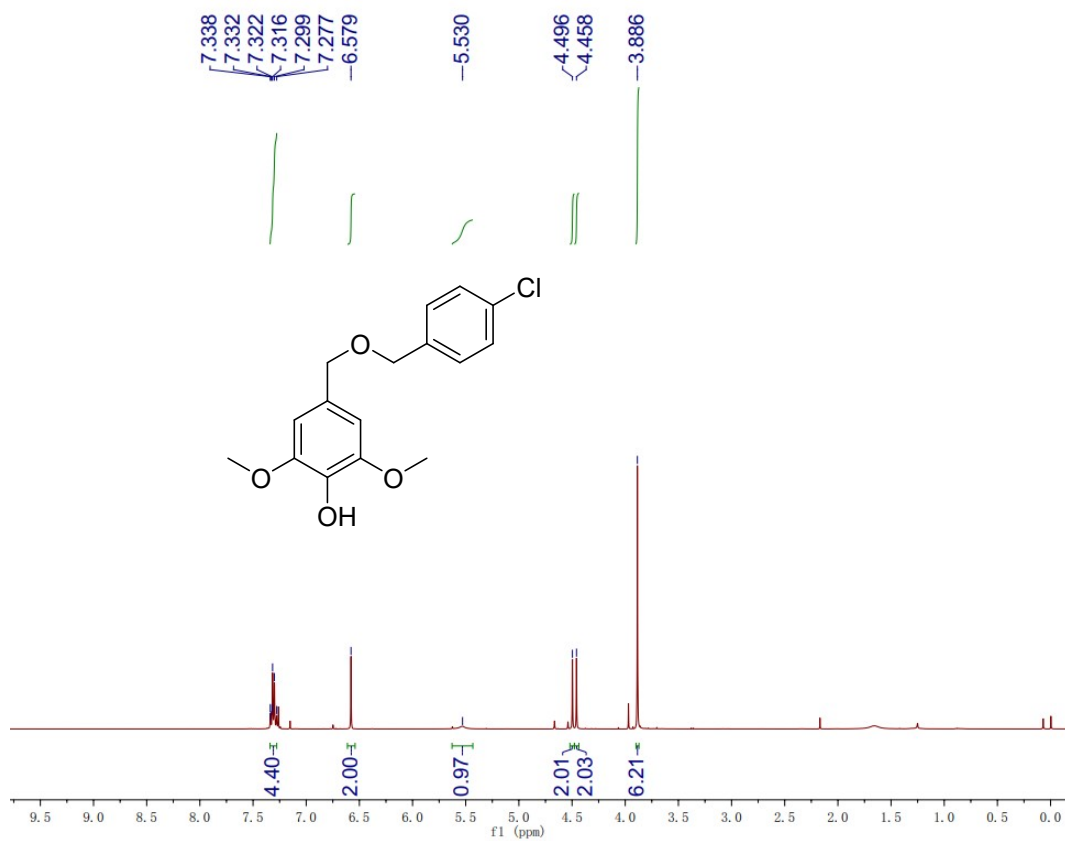

[<sup>13</sup>C\_NMR\_150 MHz\_(CDCl<sub>3</sub>: 77.00 ppm)]

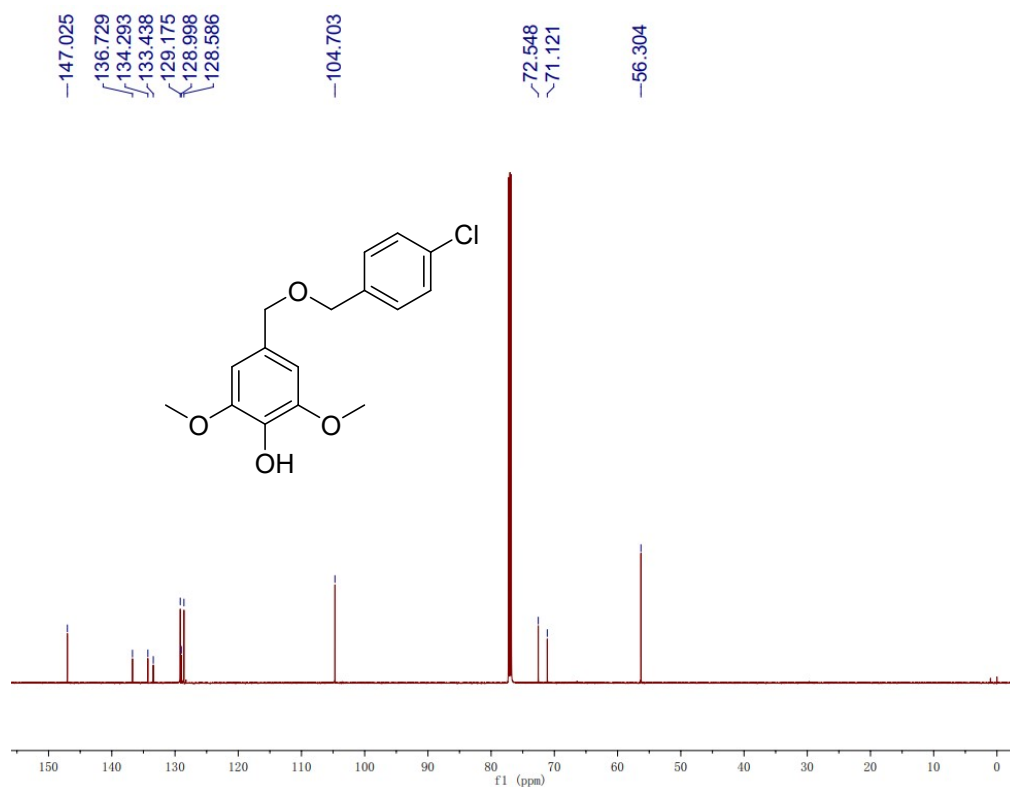

4-(((2-Bromobenzyl)oxy)methyl)-2,6-dimethoxyphenol (3n) [<sup>1</sup>H\_NMR\_400 MHz\_(CDCl<sub>3</sub>: 7.26 ppm)]

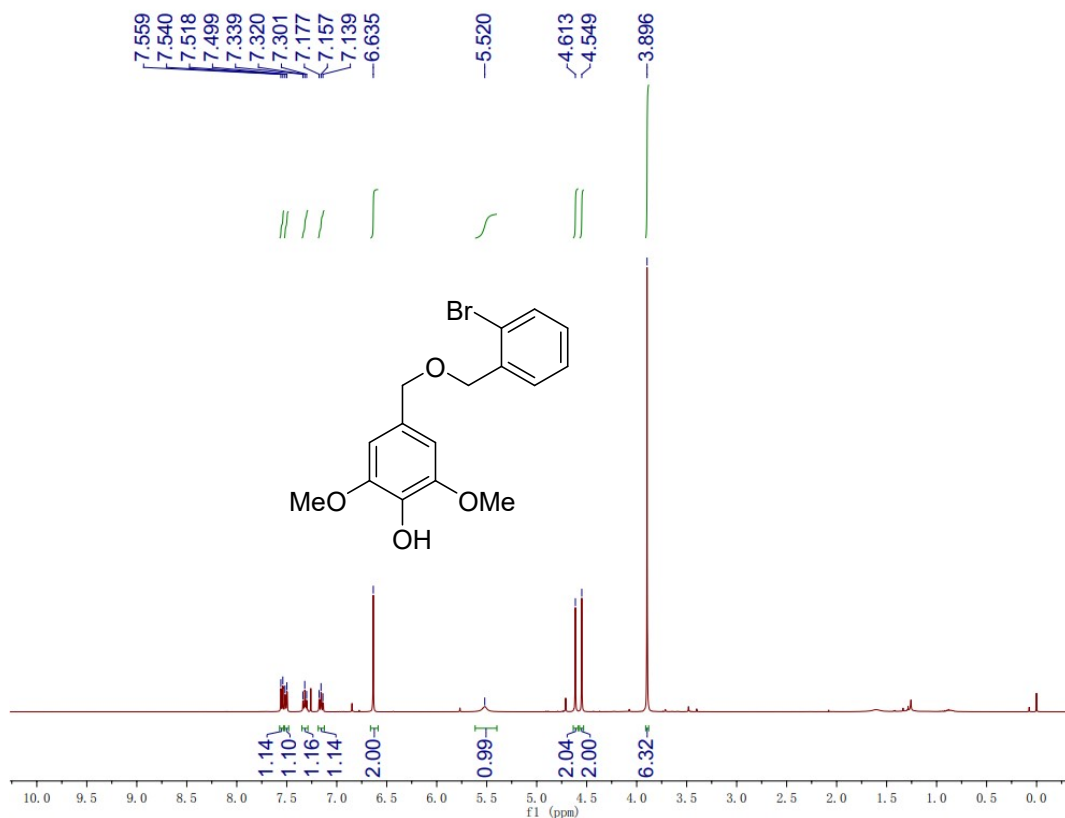

[<sup>13</sup>C\_NMR\_100 MHz\_(CDCl<sub>3</sub>: 77.00 ppm)]

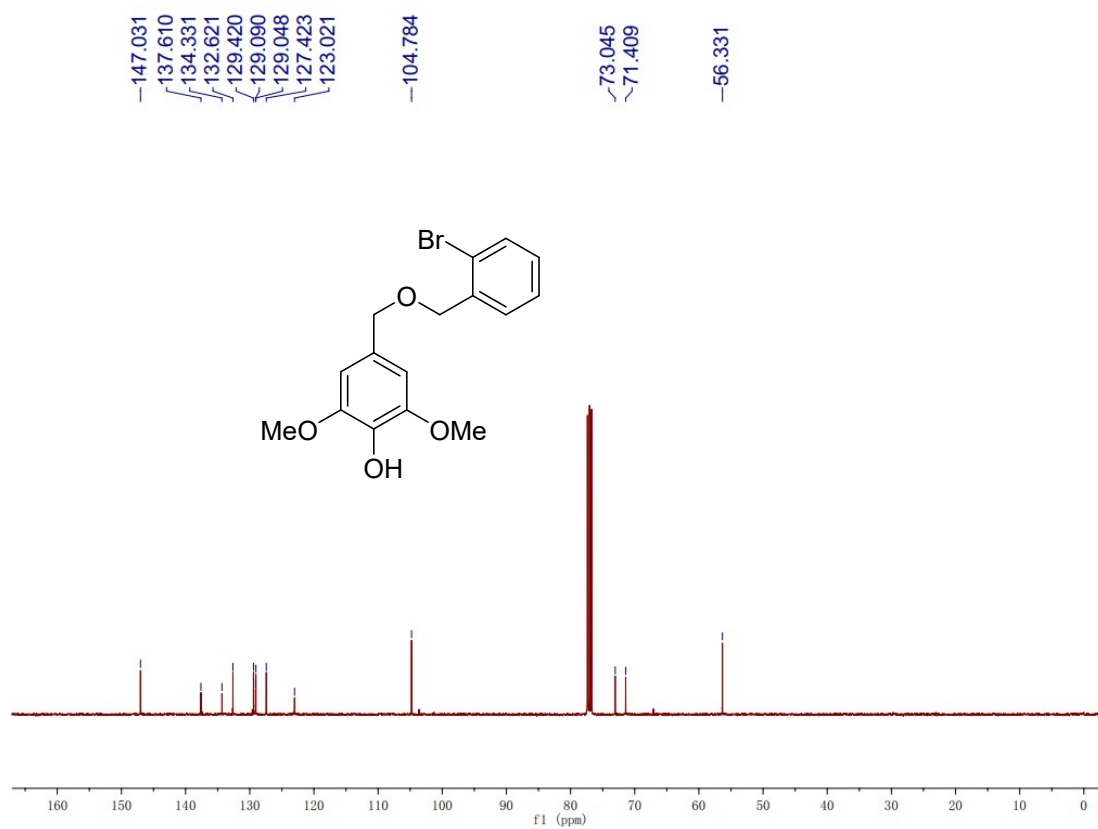

**2,6-Dimethoxy-4-((2-methoxybenzyl)oxy)methylphenol (30)** [<sup>1</sup>H\_NMR\_400 MHz\_(CDCl<sub>3</sub>: 7.26 ppm)]

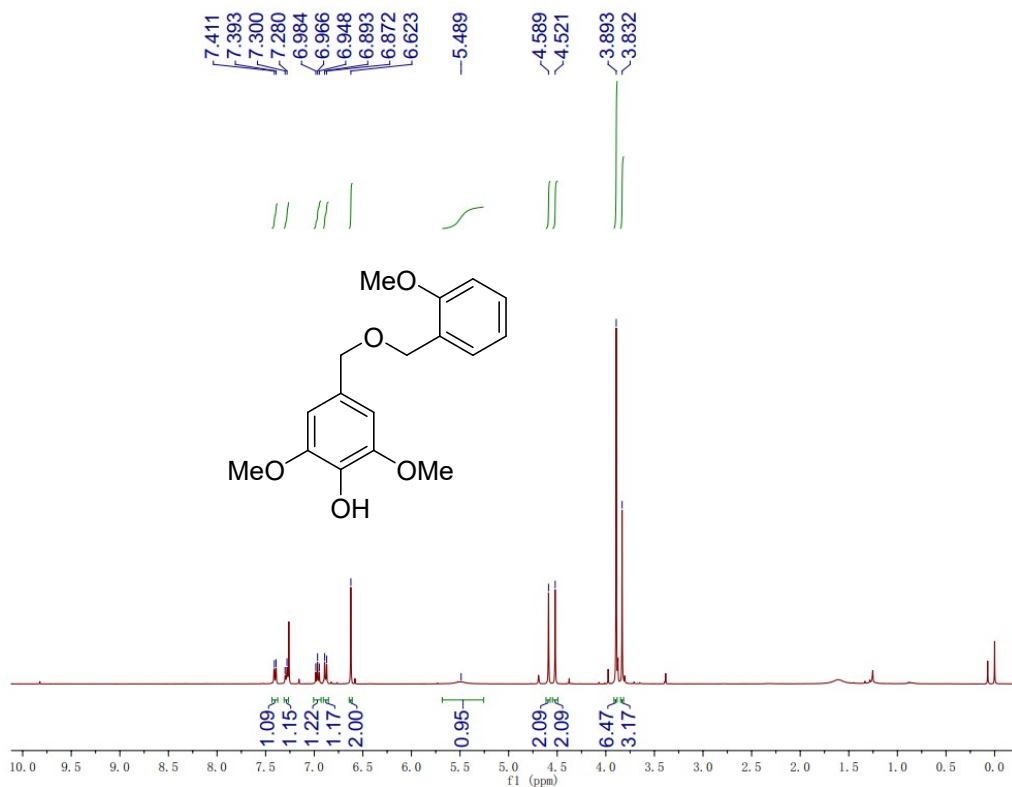

[<sup>13</sup>C\_NMR\_150 MHz\_(CDCl<sub>3</sub>: 77.00 ppm)]

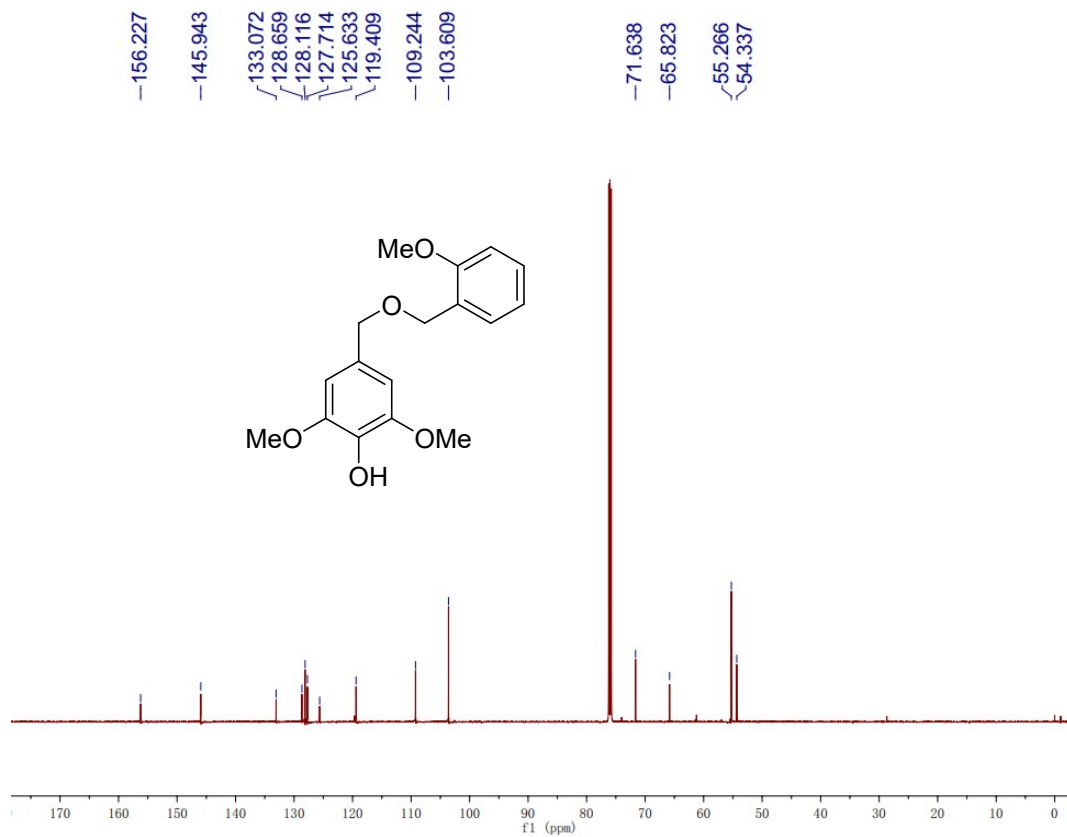

4-(((3-Bromobenzyl)oxy)methyl)-2,6-dimethoxyphenol (3p) [<sup>1</sup>H\_NMR\_400 MHz\_(CDCl<sub>3</sub>: 7.26 ppm)]

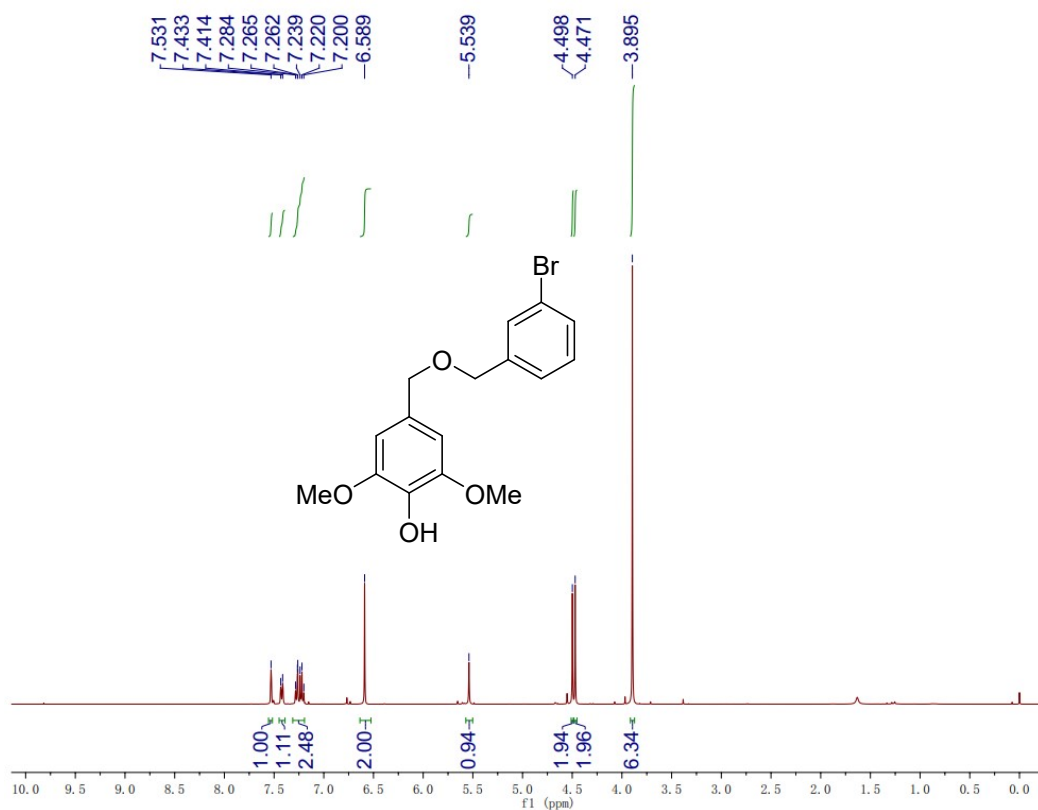

[<sup>13</sup>C\_NMR\_150 MHz\_(CDCl<sub>3</sub>: 77.00 ppm)]

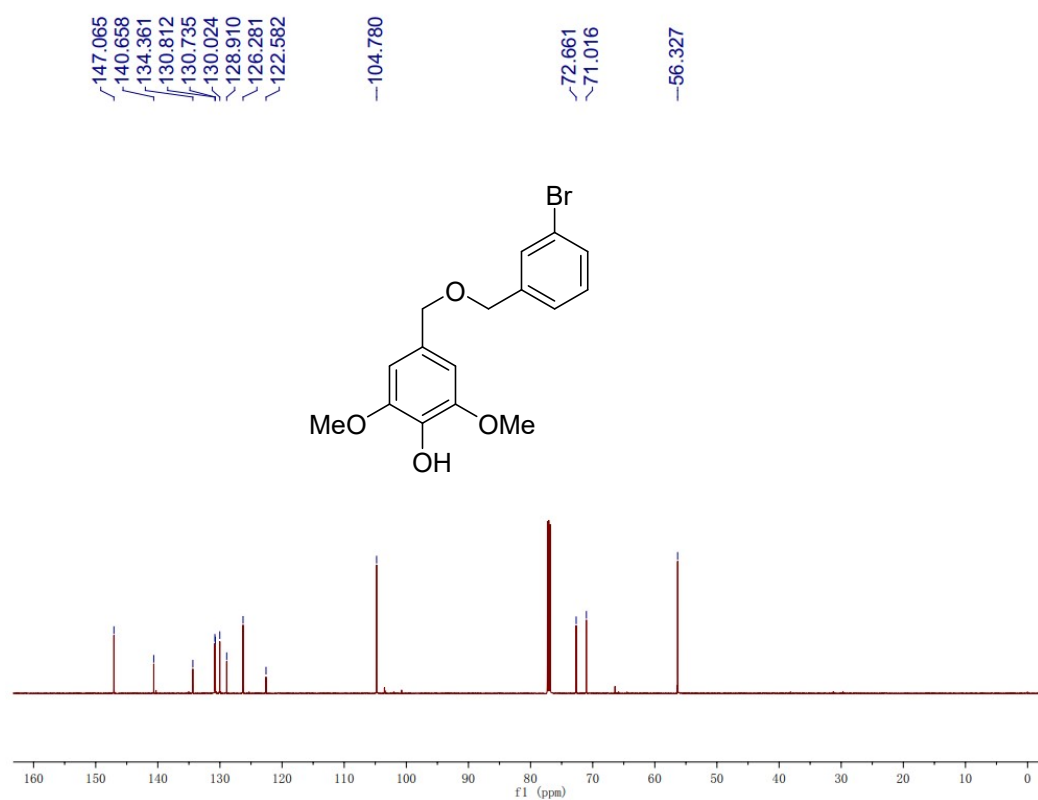

4-((2-Bromophenoxy)methyl)-2,6-dimethoxyphenol (3q) [<sup>1</sup>H\_NMR\_400 MHz\_(CDCl<sub>3</sub>: 7.26 ppm)]



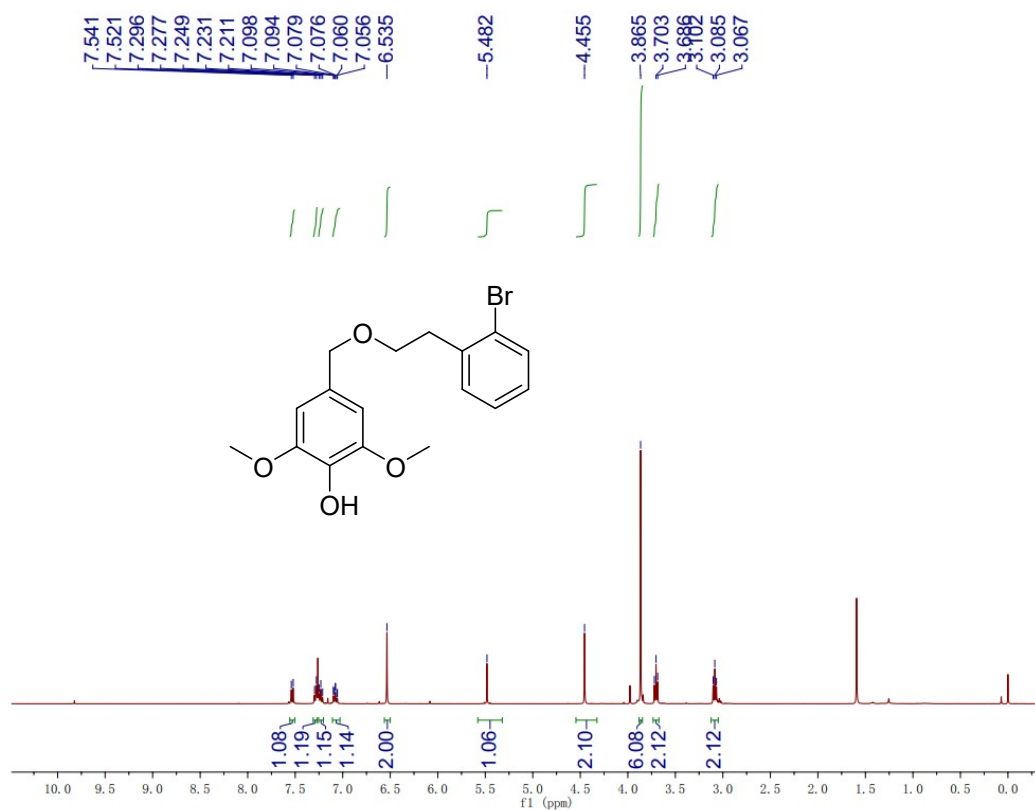

[<sup>13</sup>C\_NMR\_150 MHz\_(CDCl<sub>3</sub>: 77.00 ppm)]

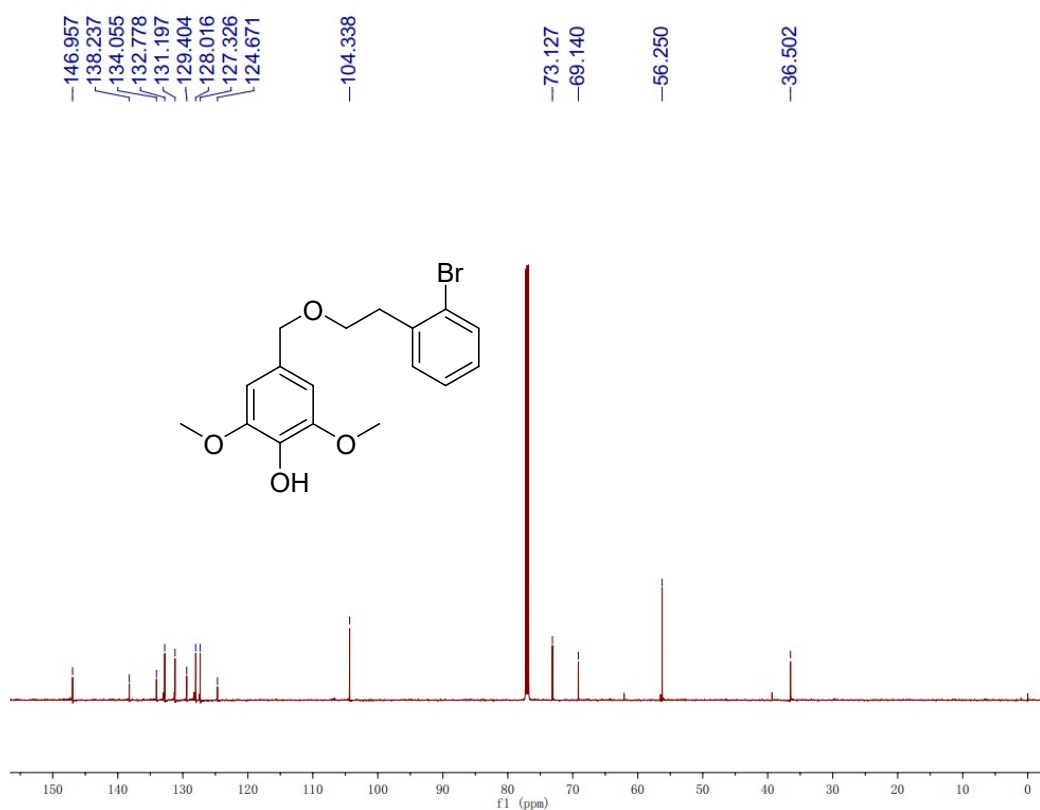

**4-((3-(Benzyloxy)propoxy)methyl)-2,6-dimethoxyphenol (3r)** [<sup>1</sup>H\_NMR\_400 MHz\_(CDCl<sub>3</sub>: 7.26 ppm)]

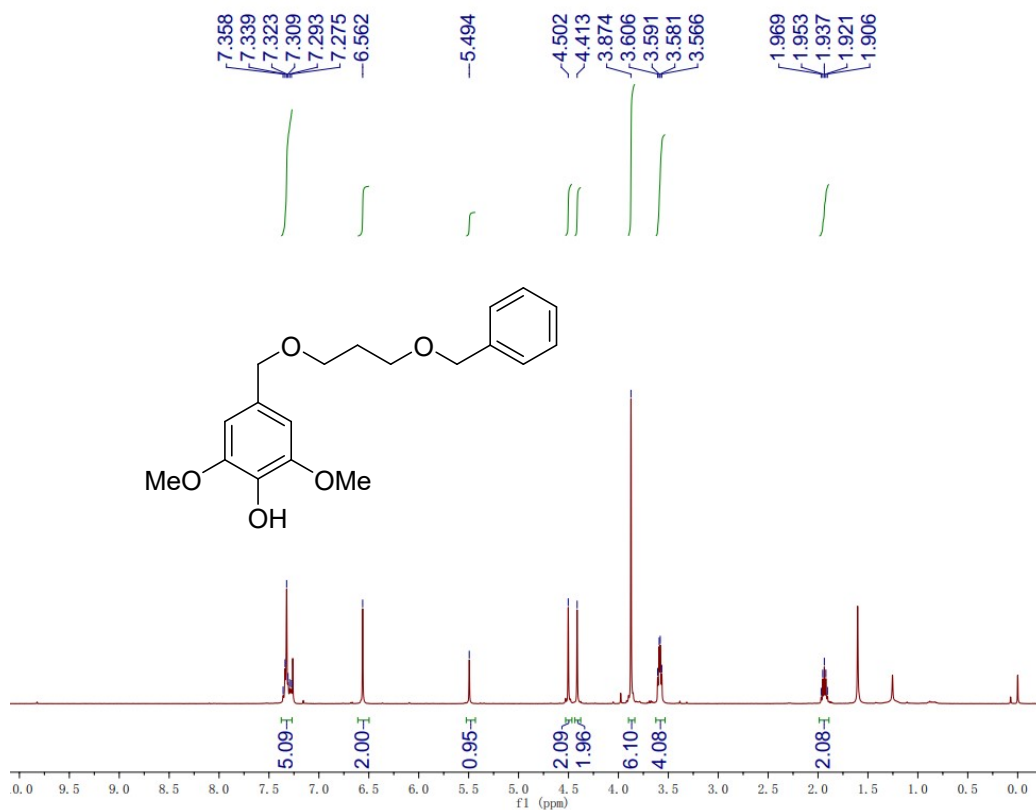

[<sup>13</sup>C\_NMR\_100 MHz\_(CDCl<sub>3</sub>: 77.00 ppm)]

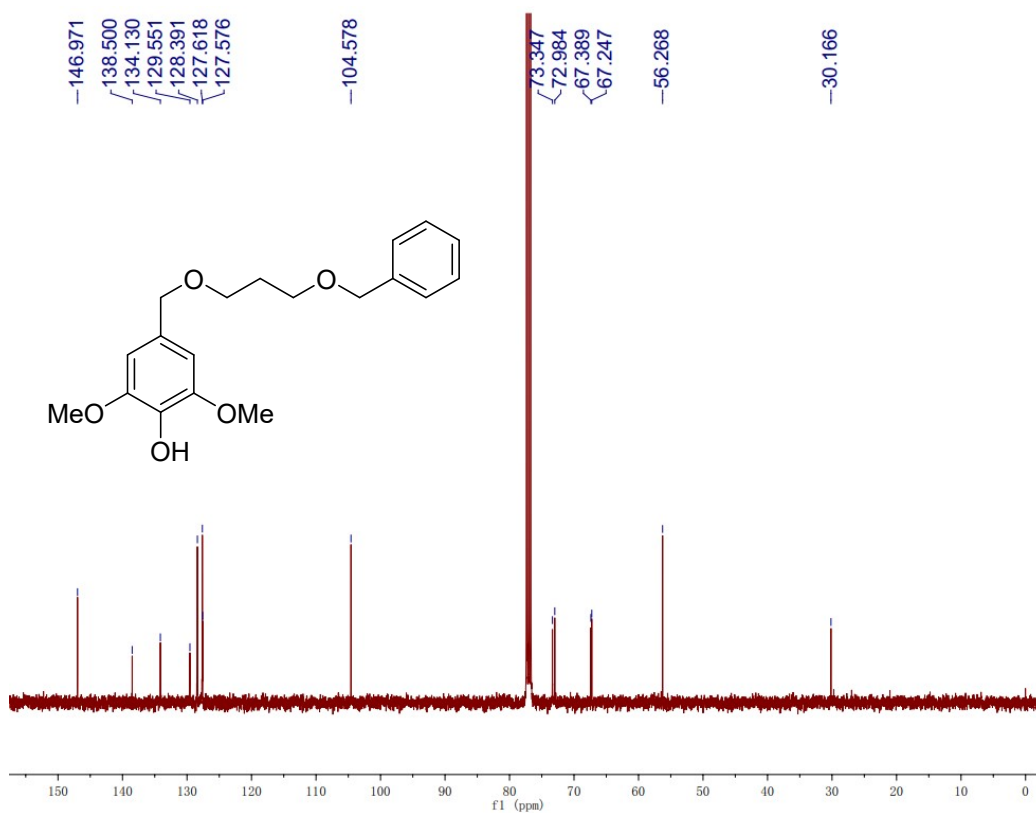

**2,6-Dimethoxy-4-((2-(naphthalen-2-yl)ethoxy)methyl)phenol (3s)** [<sup>1</sup>H\_NMR\_400 MHz\_(CDCl<sub>3</sub>: 7.26 ppm)]

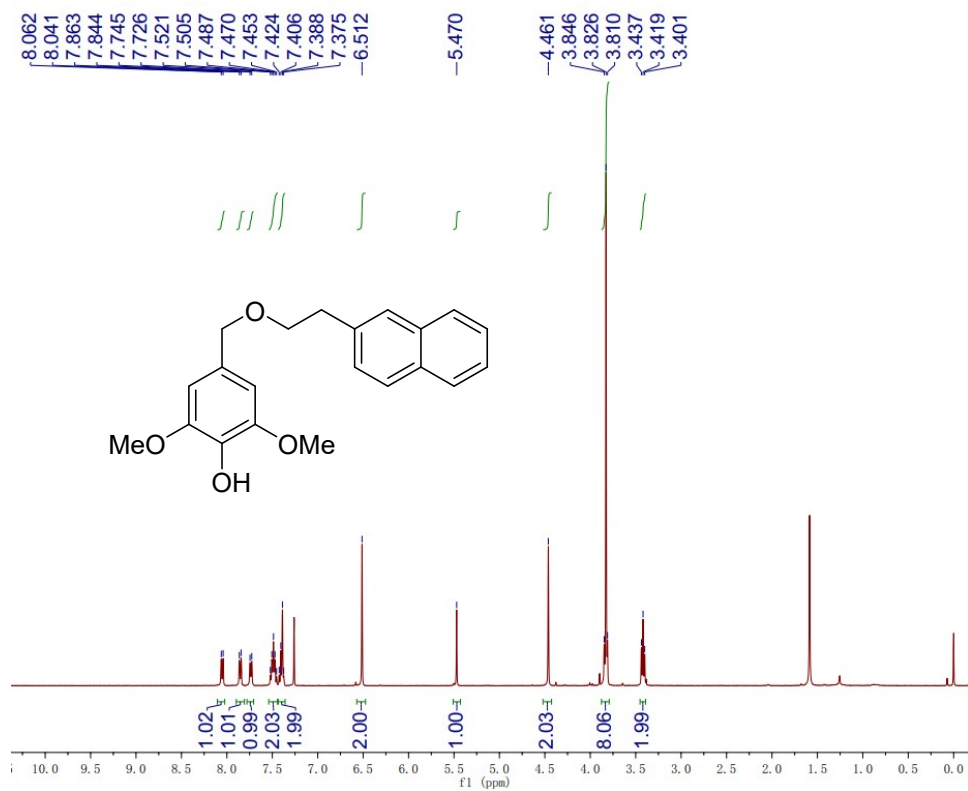

[<sup>13</sup>C\_NMR\_150 MHz\_(CDCl<sub>3</sub>: 77.00 ppm)]

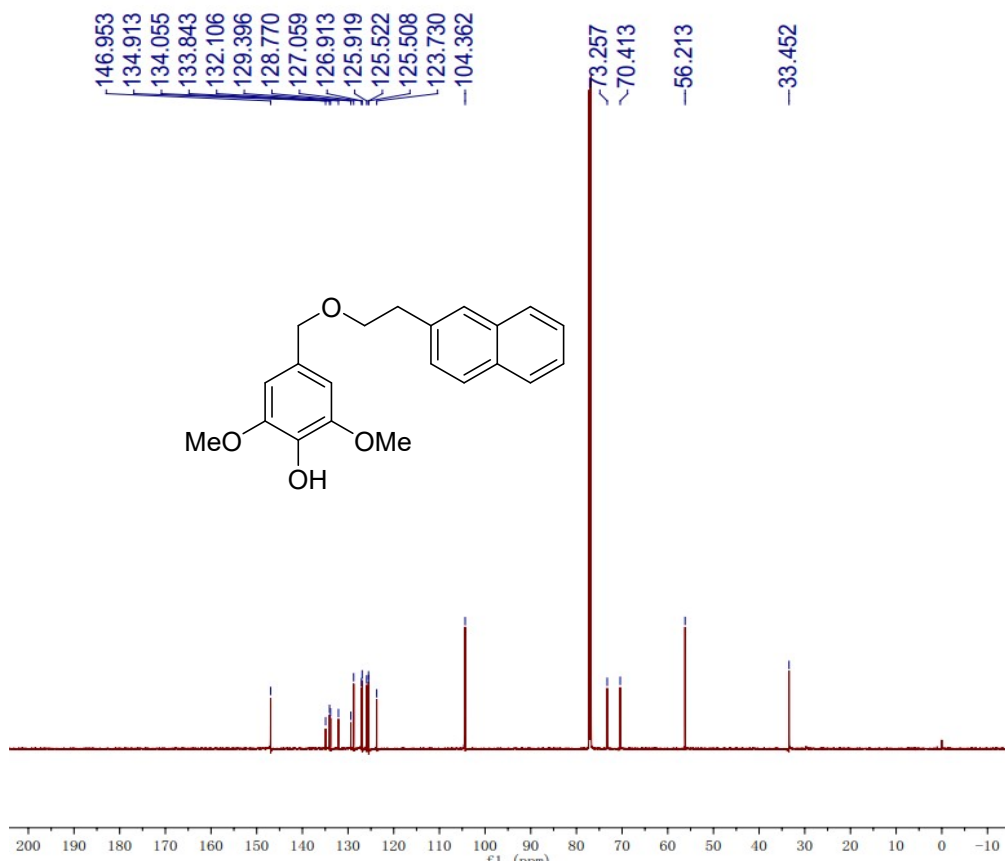

**4-(1-Ethoxyethyl)-2,6-dimethoxyphenol (3t)** [<sup>1</sup>H\_NMR\_400 MHz\_(CDCl<sub>3</sub>: 7.26 ppm)]

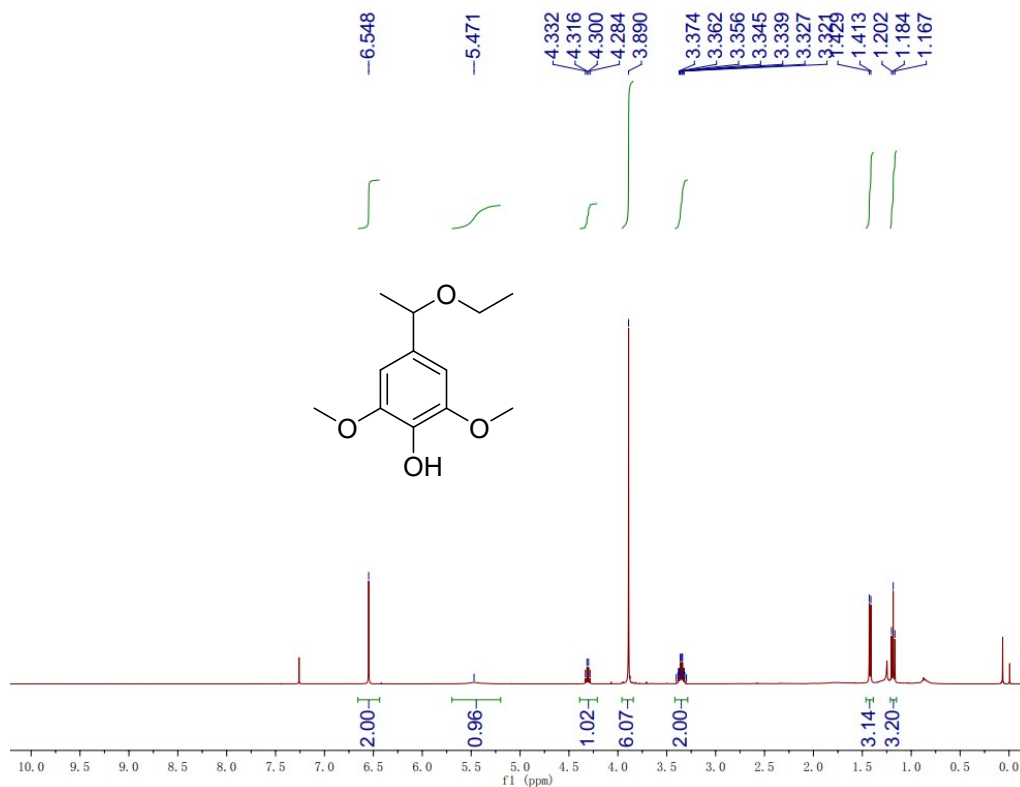

[<sup>13</sup>C\_NMR\_150 MHz\_(CDCl<sub>3</sub>: 77.00 ppm)]

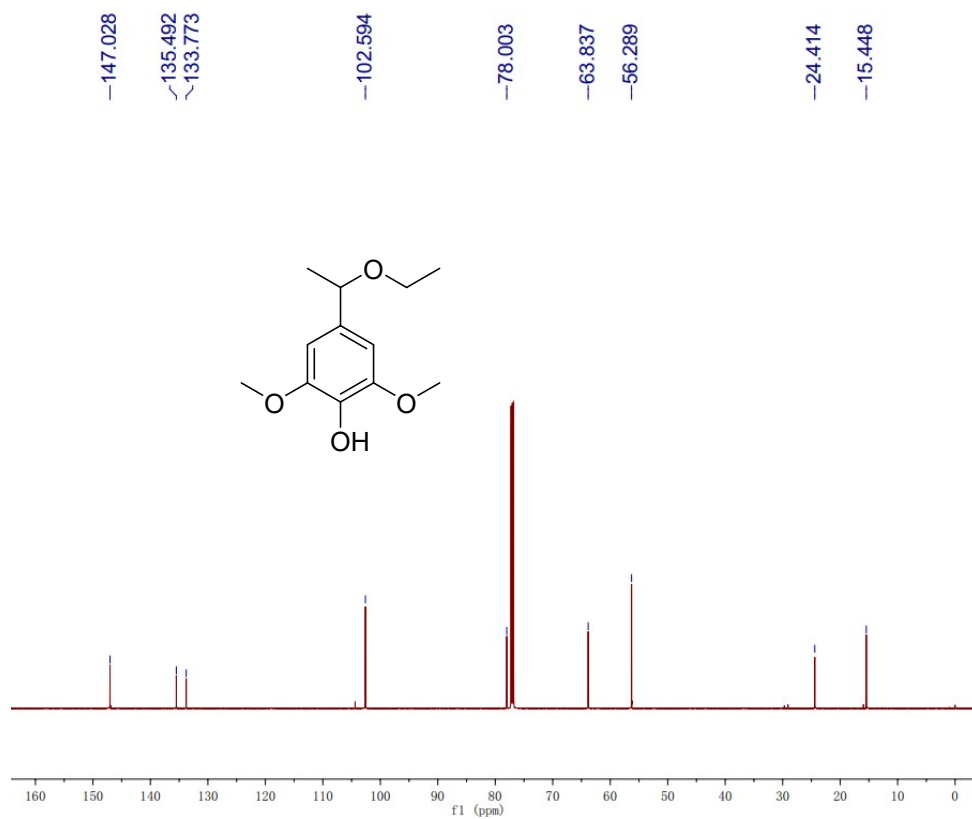

**2,6-Dimethoxy-4-((methoxy-d<sub>3</sub>)(p-tolyl)methyl)phenol (2ax')** [<sup>1</sup>H\_NMR\_400 MHz\_(CDCl<sub>3</sub>: 7.26 ppm)]

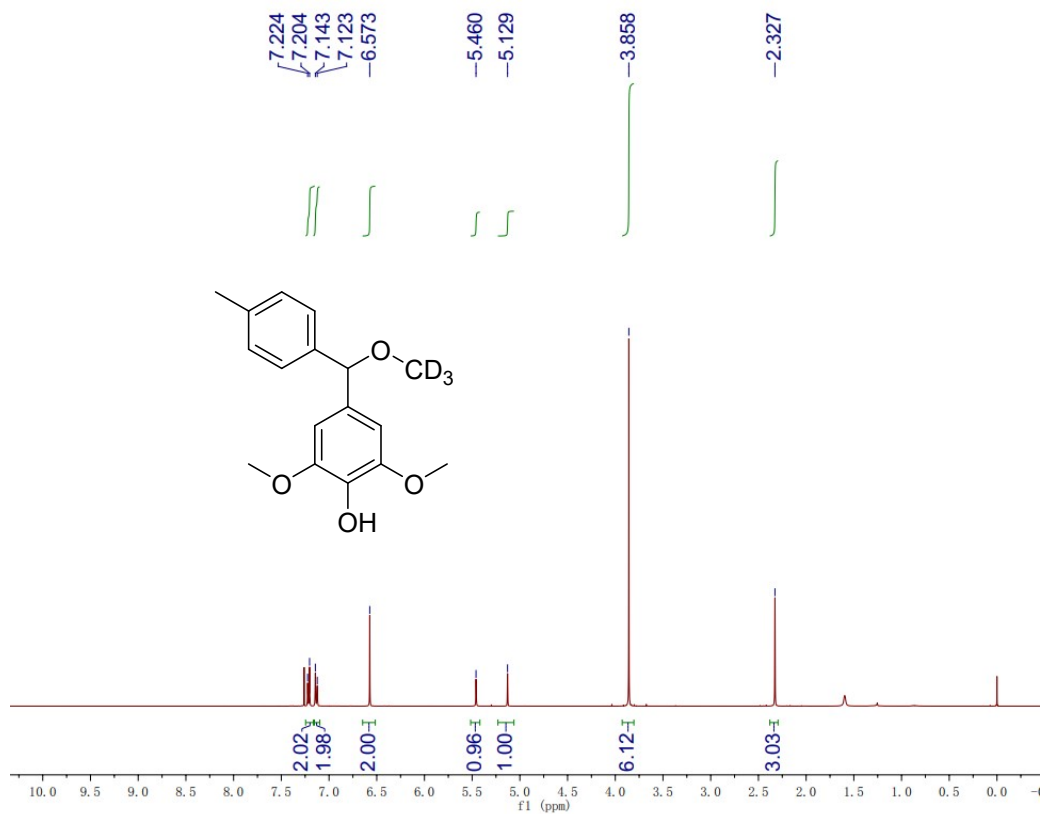

[ $^{13}\text{C}$ \_NMR\_150 MHz\_( $\text{CDCl}_3$ : 77.00 ppm)]

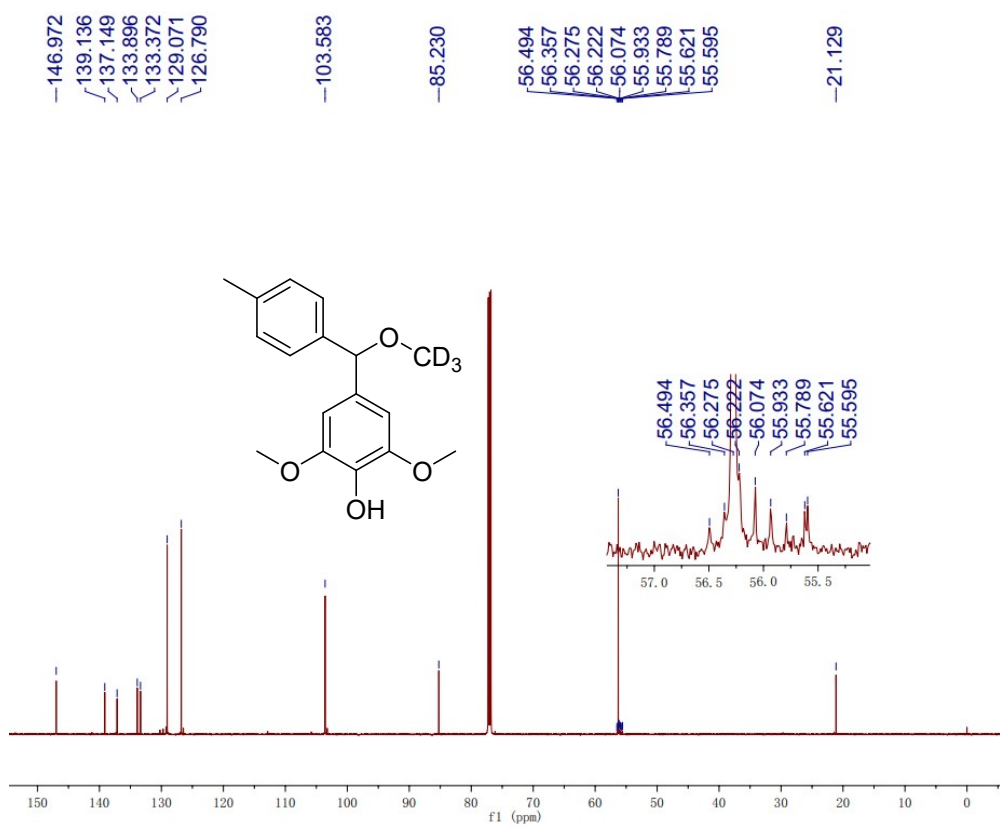

**4-Hydroxy-3,5-dimethoxybenzaldehyde (4a)** [ $^1\text{H}$ \_NMR\_400 MHz\_( $\text{CDCl}_3$ : 7.26 ppm)]

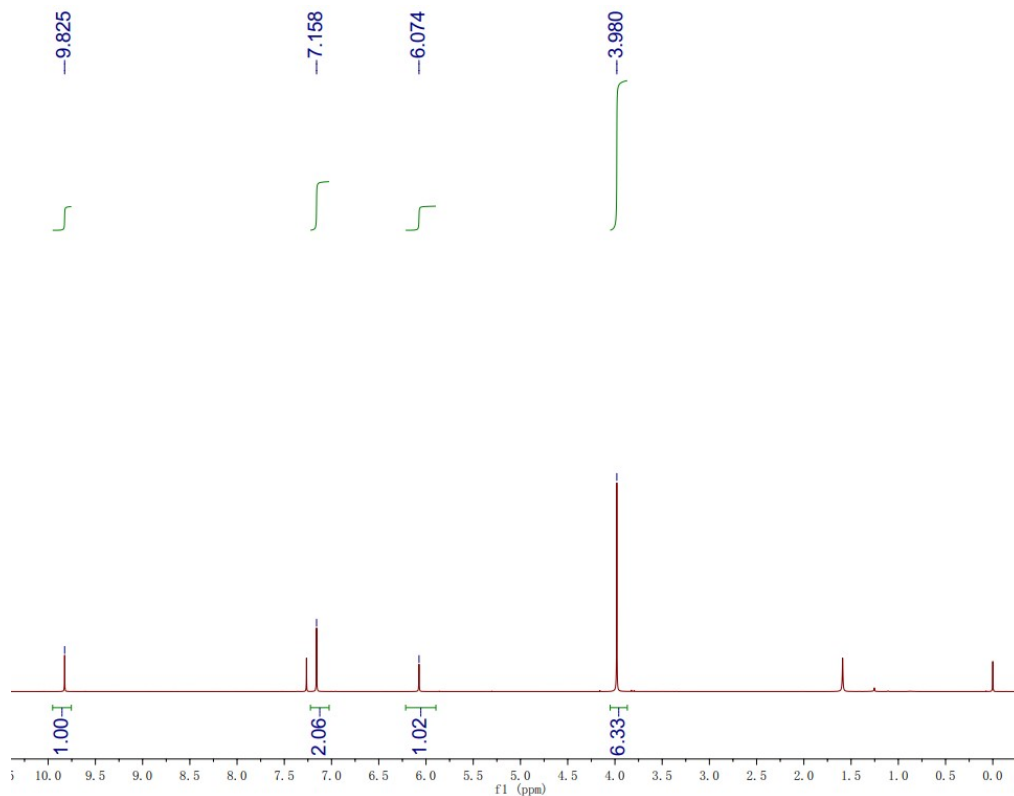

[<sup>13</sup>C\_NMR\_150 MHz\_(CDCl<sub>3</sub>: 77.00 ppm)]

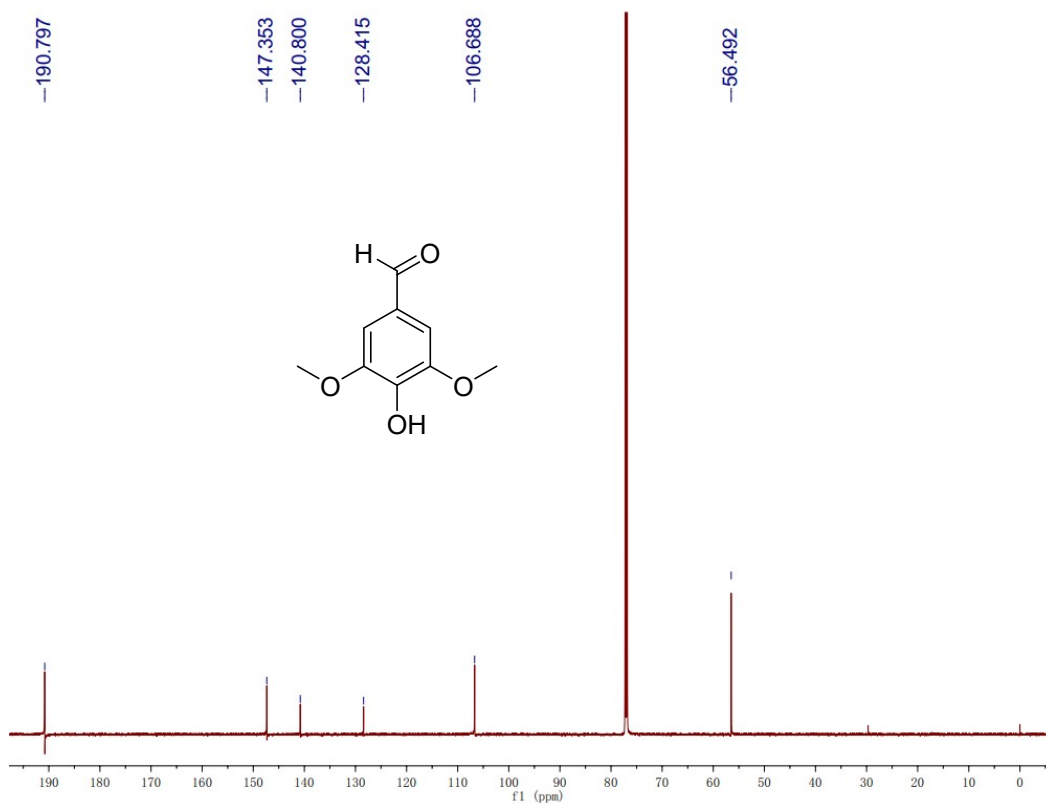

3,3'-Dimethoxy-5,5'-dimethyl-[1,1'-biphenyl]-2,2'-diol (2a') [<sup>1</sup>H\_NMR\_400 MHz\_(CDCl<sub>3</sub>: 7.26 ppm)]

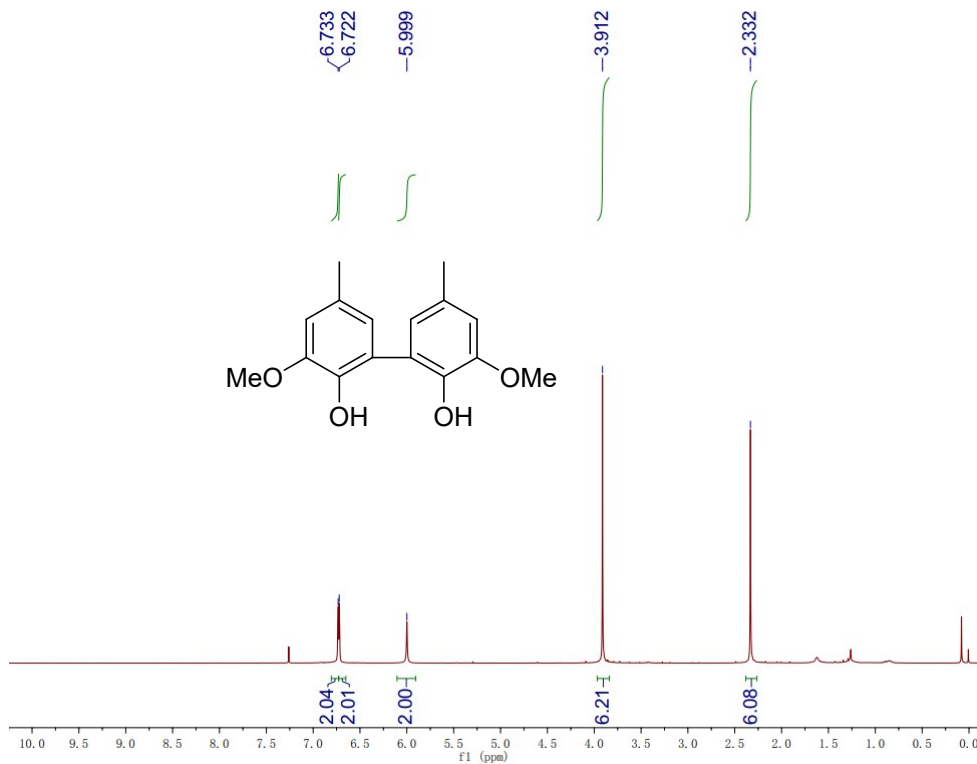

[<sup>13</sup>C\_NMR\_150 MHz\_(CDCl<sub>3</sub>: 77.00 ppm)]

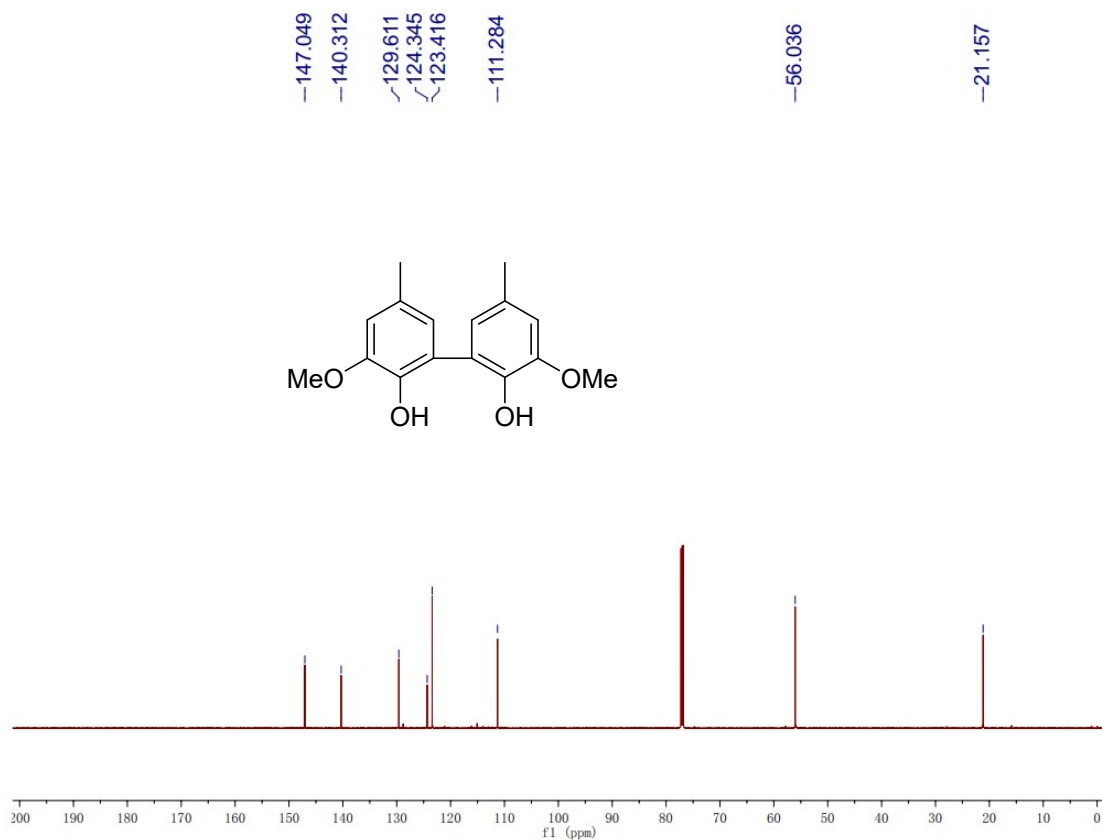

**4-Benzylidene-2,6-dimethoxycyclohexa-2,5-dien-1-one (VII')** [<sup>1</sup>H\_NMR\_400 MHz\_(CDCl<sub>3</sub>: 7.26 ppm)]

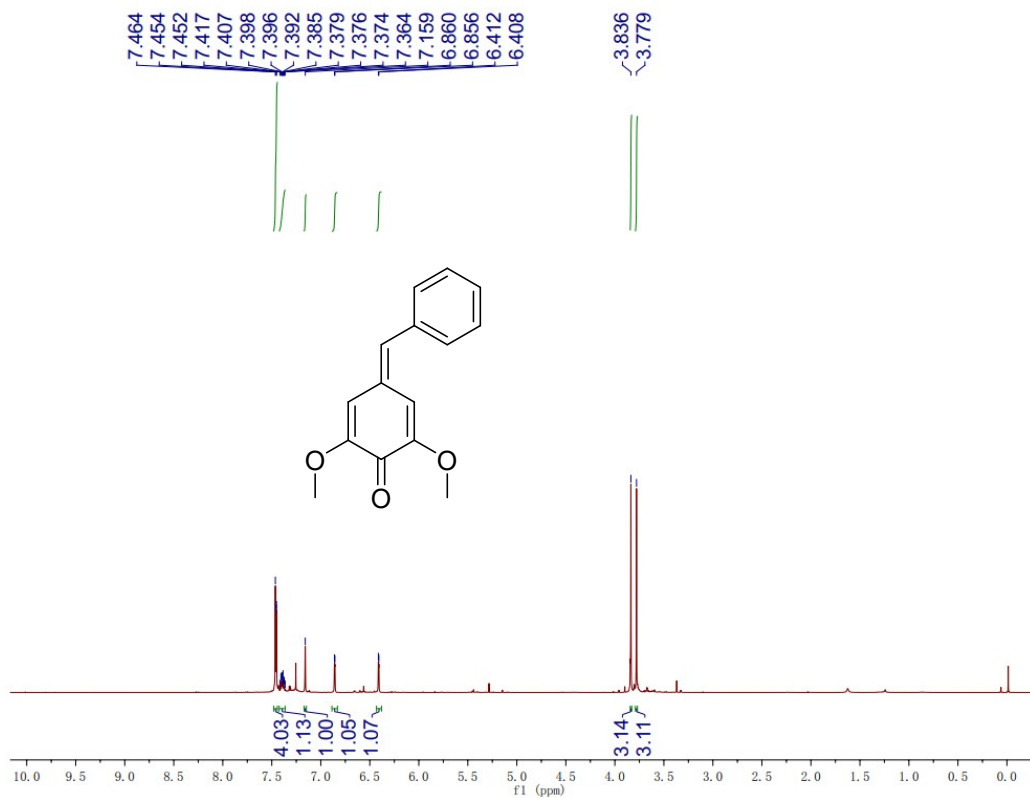

[<sup>13</sup>C\_NMR\_150 MHz\_(CDCl<sub>3</sub>: 77.00 ppm)]

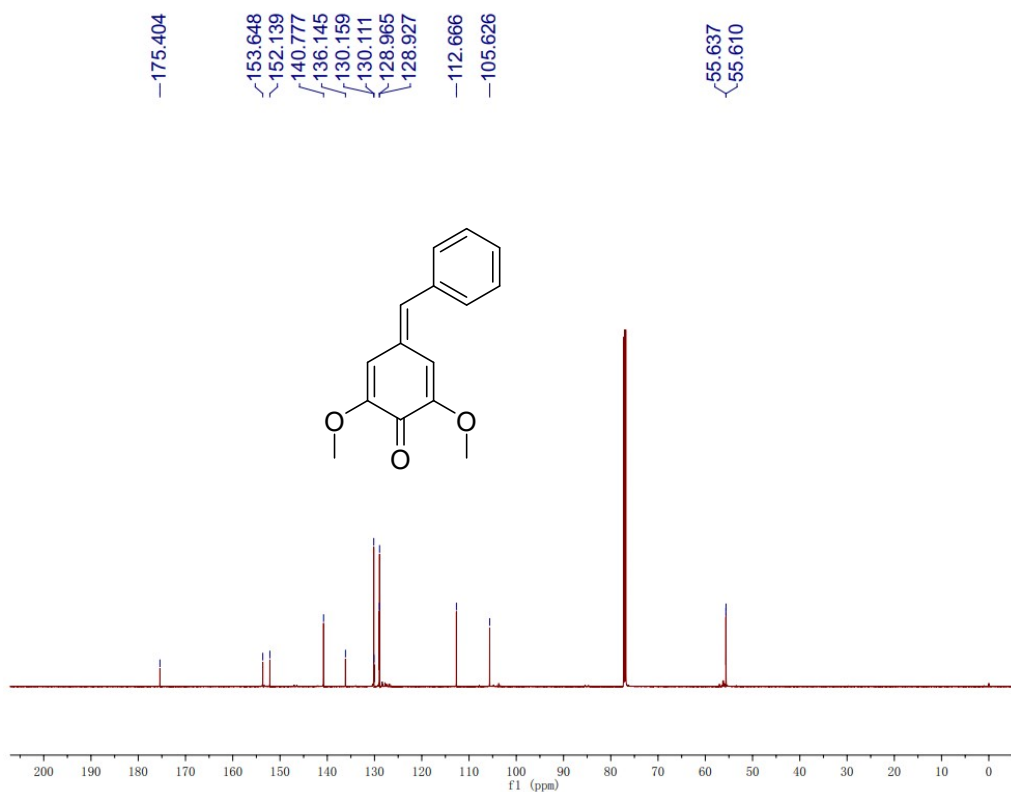

Supplement: d3gc04070d1.pdf [file d3gc04070d1.pdf]
